# Supplementary material for: A resource of “bottom-line” variant associations for 1,281 complex traits by integrating data across published genome-wide association studies
Source: Research Square preprint supplement (doi:10.21203/rs.3.rs-8585052/v1), 2026-01-22
Supplement: Supplementary file 1 [file f625ff348b65c2495a5480c4.xlsx]

## Sheet: Table description
A resource of “bottom-line” variant associations for 1,281 complex traits by integrating data across published genome wide association studies
Table	Description
Table S1	2602 studies across 830 traits and 9 ancestries
Table S2	Traits and studies in GWAS Catalog
Table S3a	Number of significant association signals for each of 270 trait-ancestry pairs in all single-ancestry analyses (main)
Table S3b	Number of significant association signals for each of 97 trait-ancestry pairs in all single-ancestry analyses (validation)
Table S4a	Number of independent signals across all shared association regions in 191 traits in European ancestry
Table S4b	Number of independent signals, number of shared association regions with different numbers of independent signals, sample size for 188 traits in European ancestry (with at least one shared region)
Table S5a	Heritability estimates for 270 trait-ancestry pairs produced by overlap-corrected and largest GWAS
Table S5b	Genetic correlations for 8,097 pairs of traits within the same ancestry produced by overlap-corrected and largest GWAS (where at least one estimate is significant)
Table S5c	Spearman's correlation results for tissue-specific functional enrichment for 179 trait-ancestry pairs with at least two significant functional annotations
Table S6a	Spearman's correlation results for gene-level associations for 244 trait-ancestry pairs with at least two significant gene sets
Table S6b	Spearman's correlation results for gene set enrichment for 212 trait-ancestry pairs with at least two significant gene sets
Table S6c	Enrichment scores for top 50 gene set enrichment for 270 trait-ancestry pairs
Table S7	Number of significant association signals for each trait in all trans-ancestry analyses (each column represents a non-overlapping part of the Venn diagram)
Table S8a	All studies in the A2FKP as of July 2025
Table S8b	Description of all traits in the A2FKP as of July 2025
Table S8c	Description of all ancestries in the A2FKP as of July 2025
Table S9a	Sample size fold increase for each trait-ancestry pair with more than one study available
Table S9b	Traits with trans-ancestry results for the first time
Table S10a	Number of significant single-ancestry association signals (after merging the clumps) for each phenotype in each phenotype group in the A2FKP
Table S10b	Number of significant single-ancestry common association signals (before merging the clumps) for each phenotype in the A2FKP produced by the overlap-corrected meta-analysis that were also replicated in the largest GWAS and any GWAS
Table S10c	Number of significant transancestry association signals (after merging the clumps) for each phenotype in each phenotype group in the A2FKP
Table S11	Highlighted significant associations in the A2FKP
Table S12	LDB3 expression summary

## Sheet: Table S1
Dataset ID	Trait	Technology	Dataset-level sample size	PMID	Number of variants
Agrawal2022_LocalAdiposity_Mixed	ASAT	GWAS	38960	35773277	11485690
Agrawal2022_LocalAdiposity_Mixed	ASATadjBMIHeight	GWAS	38960	35773277	11485690
Agrawal2022_LocalAdiposity_Mixed	ASATtoGFAT	GWAS	38960	35773277	11485690
Agrawal2022_LocalAdiposity_Mixed	GFAT	GWAS	38960	35773277	11485690
Agrawal2022_LocalAdiposity_Mixed	GFATadjBMIHeight	GWAS	38960	35773277	11485690
Agrawal2022_LocalAdiposity_Mixed	VAT	GWAS	38960	35773277	11485690
Agrawal2022_LocalAdiposity_Mixed	VATadjBMIHeight	GWAS	38960	35773277	11485690
Agrawal2022_LocalAdiposity_Mixed	VATtoASAT	GWAS	38960	35773277	11485690
Agrawal2022_LocalAdiposity_Mixed	VATtoGFAT	GWAS	38960	35773277	11485690
Agrawal2022_LocalAdiposity_Mixed_females	ASAT	GWAS	20038	35773277	11485690
Agrawal2022_LocalAdiposity_Mixed_females	ASATadjBMIHeight	GWAS	20038	35773277	11485690
Agrawal2022_LocalAdiposity_Mixed_females	ASATtoGFAT	GWAS	20038	35773277	11485690
Agrawal2022_LocalAdiposity_Mixed_females	GFAT	GWAS	20038	35773277	11485690
Agrawal2022_LocalAdiposity_Mixed_females	GFATadjBMIHeight	GWAS	20038	35773277	11485690
Agrawal2022_LocalAdiposity_Mixed_females	VAT	GWAS	20038	35773277	11485690
Agrawal2022_LocalAdiposity_Mixed_females	VATadjBMIHeight	GWAS	20038	35773277	11485690
Agrawal2022_LocalAdiposity_Mixed_females	VATtoASAT	GWAS	20038	35773277	11485690
Agrawal2022_LocalAdiposity_Mixed_females	VATtoGFAT	GWAS	20038	35773277	11485690
Agrawal2022_LocalAdiposity_Mixed_males	ASAT	GWAS	19038	35773277	11485690
Agrawal2022_LocalAdiposity_Mixed_males	ASATadjBMIHeight	GWAS	19038	35773277	11485690
Agrawal2022_LocalAdiposity_Mixed_males	ASATtoGFAT	GWAS	19038	35773277	11485690
Agrawal2022_LocalAdiposity_Mixed_males	GFAT	GWAS	19038	35773277	11485690
Agrawal2022_LocalAdiposity_Mixed_males	GFATadjBMIHeight	GWAS	19038	35773277	11485690
Agrawal2022_LocalAdiposity_Mixed_males	VAT	GWAS	19038	35773277	11485690
Agrawal2022_LocalAdiposity_Mixed_males	VATadjBMIHeight	GWAS	19038	35773277	11485690
Agrawal2022_LocalAdiposity_Mixed_males	VATtoASAT	GWAS	19038	35773277	11485690
Agrawal2022_LocalAdiposity_Mixed_males	VATtoGFAT	GWAS	19038	35773277	11485690
Akiyama2017_BMI_EA	BMI	GWAS	158284	28892062	5960973
Aldridge2023_PostStrokeMotorRecovery_Mixed	PSMR	GWAS	421	37813584	6578472
Allen2022_IPF_EU	IPF	GWAS	24589	35688625	7554248
Allen2022_LungFunction_EU	DLCOInIPF	GWAS	1048	35985358	7536843
Allen2022_LungFunction_EU	FVCinIPF	GWAS	1048	35985358	7611174
Andlauer2016_MS_EU	MultipleSclerosis	GWAS	15283	27386562	7424285
Anstee2020_NAFLD_eu	NAFLD	GWAS	19264	32298765	7386479
Antikainen2021_CADinT1D_EU	CADinT1D	GWAS	4869	32077919	8742270
Aragam2022_CAD_EU	CAD	GWAS	1347212	36474045	20073070
Aragam2022_CAD_Mixed	CAD	GWAS	1378170	36474045	20804423
Aragam2022_CAD_Mixed_females	CAD	GWAS	333496	36474045	7803917
Aragam2022_CAD_Mixed_males	CAD	GWAS	294536	36474045	7803917
Asgari2020_Height_HS	HEIGHT	GWAS	3134	32499652	7830173
Atkins2021_FrailtyIndex_EU	FrailtyIndex	GWAS	175226	34431594	7663022
Aung2019_LeftVentricular_EU	LVEDV	GWAS	16923	31554410	6404719
Aung2019_LeftVentricular_EU	LVEF	GWAS	16923	31554410	6404689
Aung2019_LeftVentricular_EU	LVESV	GWAS	16923	31554410	6404755
Aung2019_LeftVentricular_EU	LVmass	GWAS	16923	31554410	6404755
Aung2019_LeftVentricular_EU	LVmass-EDVratio	GWAS	16923	31554410	6404733
Backman2021_UKBBTraits_EU	GripL	ExSeq	460844	34662886	415109
Backman2021_UKBBTraits_EU	GripR	ExSeq	460844	34662886	415139
Backman2021_UKBBTraits_EU	SRH	ExSeq	460844	34662886	9851866
Baird2018_HipShape_Mixed	HSM1	GWAS	15934	30320955	7223859
Baird2018_HipShape_Mixed	HSM10	GWAS	15934	30320955	7223820
Baird2018_HipShape_Mixed	HSM2	GWAS	15934	30320955	7223808
Baird2018_HipShape_Mixed	HSM3	GWAS	15934	30320955	7223836
Baird2018_HipShape_Mixed	HSM4	GWAS	15934	30320955	7223882
Baird2018_HipShape_Mixed	HSM5	GWAS	15934	30320955	7223882
Baird2018_HipShape_Mixed	HSM6	GWAS	15934	30320955	7223842
Baird2018_HipShape_Mixed	HSM7	GWAS	15934	30320955	7223820
Baird2018_HipShape_Mixed	HSM8	GWAS	15934	30320955	7223763
Baird2018_HipShape_Mixed	HSM9	GWAS	15934	30320955	7223763
Balcha2020_T1D_AF	T1D	GWAS	436	32705316	660247
Barton2021_Cardiometabolic_EU	ALP	GWAS	458235	34226706	4347363
Barton2021_Cardiometabolic_EU	ALT	GWAS	458235	34226706	4347363
Barton2021_Cardiometabolic_EU	AST	GWAS	458235	34226706	4347363
Barton2021_Cardiometabolic_EU	BILIRUBIN	GWAS	458235	34226706	4347363
Barton2021_Cardiometabolic_EU	BMI	GWAS	458235	34226706	4347363
Barton2021_Cardiometabolic_EU	DBP	GWAS	458235	34226706	4347363
Barton2021_Cardiometabolic_EU	GGT	GWAS	458235	34226706	4347363
Barton2021_Cardiometabolic_EU	HDL	GWAS	458235	34226706	4347363
Barton2021_Cardiometabolic_EU	HEIGHT	GWAS	458235	34226706	4347363
Barton2021_HBA1C_EU	HBA1C	ExSeq	437749	34226706	5515005
Beaumont2018_MBW_EU_Females	MBW	GWAS	68253	29309628	8736122
Beecham2013_MS_eu	MultipleSclerosis	IChip	38582	24076602	151551
Bellenguez2022_Alzheimers_EU	AD	GWAS	487511	35379992	19900946
Bentham2015_SLE_EU	SLE	GWAS	14267	26502338	7083928
Farhan2019_ALS_eu	ALS	ExSeq	11703	NA	NA
Blauwendraat2021_PD_EU_Females	Parkinsons	GWAS	98609	37398408	7076951
Blauwendraat2021_PD_EU_Males	Parkinsons	GWAS	102680	33901317	7016523
Blauwendraat2021_PD_EU_noUKBB_Females	Parkinsons	GWAS	19773	33901317	7309889
Blauwendraat2021_PD_EU_noUKBB_Males	Parkinsons	GWAS	24053	33901317	7234141
Blauwendraat2021_PDwithProxies_EU_Females	Parkinsons	GWAS	104082	33901317	7141403
Blauwendraat2021_PDwithProxies_EU_Males	Parkinsons	GWAS	110616	33901317	7153506
Boer2021_EarlyOA_Mixed	Early_ALLOA	GWAS	48287	34450027	20665855
Boer2021_OA_Mixed_Main	ALLOA	GWAS	826690	34450027	24318111
Boer2021_OA_Mixed_Main	FingerOA	GWAS	826690	34450027	12463386
Boer2021_OA_Mixed_Main	HandOA	GWAS	826690	34450027	14539199
Boer2021_OA_Mixed_Main	HIPKNEEOA	GWAS	826690	34450027	22207635
Boer2021_OA_Mixed_Main	HIPOA	GWAS	826690	34450027	17525302
Boer2021_OA_Mixed_Main	KNEEOA	GWAS	826690	34450027	20646983
Boer2021_OA_Mixed_Main	SpineOA	GWAS	826690	34450027	17907023
Boer2021_OA_Mixed_Main	THR	GWAS	826690	34450027	15848409
Boer2021_OA_Mixed_Main	ThumbOA	GWAS	826690	34450027	13088086
Boer2021_OA_Mixed_Main	TJR	GWAS	826690	34450027	18045898
Boer2021_OA_Mixed_Main	TKR	GWAS	826690	34450027	15281511
Boer2021_OA_Mixed_SexSpecific	ALLOA	GWAS	493805	34450027	18704700
Boer2021_OA_Mixed_SexSpecific	FingerOA	GWAS	493805	34450027	8562198
Boer2021_OA_Mixed_SexSpecific	HandOA	GWAS	493805	34450027	10355440
Boer2021_OA_Mixed_SexSpecific	HIPKNEEOA	GWAS	493805	34450027	16590567
Boer2021_OA_Mixed_SexSpecific	HIPOA	GWAS	493805	34450027	13489332
Boer2021_OA_Mixed_SexSpecific	KNEEOA	GWAS	493805	34450027	15295397
Boer2021_OA_Mixed_SexSpecific	SpineOA	GWAS	493805	34450027	13119040
Boer2021_OA_Mixed_SexSpecific	THR	GWAS	493805	34450027	12213687
Boer2021_OA_Mixed_SexSpecific	ThumbOA	GWAS	493805	34450027	9313722
Boer2021_OA_Mixed_SexSpecific	TJR	GWAS	493805	34450027	13763134
Boer2021_OA_Mixed_SexSpecific	TKR	GWAS	493805	34450027	11468571
Bonfiglio2018_IBS_EU	IBS	GWAS	346075	29626450	7267992
Bonfiglio2021_StoolFreq_EU	StoolFreq	GWAS	167875	34957435	8817117
Boua2022_cIMT_SSAF	cIMT	GWAS	7894	35165267	13971509
Boua2022_cIMT_SSAF_Females	cIMT	GWAS	3963	35165267	13971509
Boua2022_cIMT_SSAF_Males	cIMT	GWAS	3931	35165267	13971509
Broadaway2023_FastingProInsulin_EU	PI	GWAS	45861	36693378	9540781
Broadaway2023_FastingProInsulin_EU	PIadjBMI	GWAS	45861	36693378	9540588
Cade2021_SleepApnea_EU_Female	AHI	WGS	3089	34446064	10560717
Cade2021_SleepApnea_EU_Female	AvgDesaturation	WGS	3089	34446064	10615267
Cade2021_SleepApnea_EU_Female	SpO2avg	WGS	3089	34446064	10631375
Cade2021_SleepApnea_EU_Female	SpO2min	WGS	3089	34446064	10631534
Cade2021_SleepApnea_EU_Female	SpO2per90	WGS	3089	34446064	10560746
Cade2021_SleepApnea_EU_Female_Male	AHI	WGS	8341	34446064	10933226
Cade2021_SleepApnea_EU_Female_Male	AvgDesaturation	WGS	8341	34446064	10929113
Cade2021_SleepApnea_EU_Female_Male	SpO2avg	WGS	8341	34446064	10913855
Cade2021_SleepApnea_EU_Female_Male	SpO2min	WGS	8341	34446064	10952316
Cade2021_SleepApnea_EU_Female_Male	SpO2per90	WGS	8341	34446064	10932412
Cade2021_SleepApnea_EU_Male	AHI	WGS	5252	34446064	10905356
Cade2021_SleepApnea_EU_Male	AvgDesaturation	WGS	5252	34446064	10860003
Cade2021_SleepApnea_EU_Male	SpO2avg	WGS	5252	34446064	10890337
Cade2021_SleepApnea_EU_Male	SpO2min	WGS	5252	34446064	10891354
Cade2021_SleepApnea_EU_Male	SpO2per90	WGS	5252	34446064	10902389
Cade2021_SleepApnea_Mixed_Female	AHI	WGS	10696	34446064	15850625
Cade2021_SleepApnea_Mixed_Female	AvgDesaturation	WGS	10696	34446064	14992528
Cade2021_SleepApnea_Mixed_Female	SpO2avg	WGS	10696	34446064	15861684
Cade2021_SleepApnea_Mixed_Female	SpO2min	WGS	10696	34446064	15865185
Cade2021_SleepApnea_Mixed_Female	SpO2per90	WGS	10696	34446064	15858929
Cade2021_SleepApnea_Mixed_Female_Male	AHI	WGS	21245	34446064	15662750
Cade2021_SleepApnea_Mixed_Female_Male	AvgDesaturation	WGS	21245	34446064	14819266
Cade2021_SleepApnea_Mixed_Female_Male	SpO2avg	WGS	21245	34446064	15527739
Cade2021_SleepApnea_Mixed_Female_Male	SpO2min	WGS	21245	34446064	15535945
Cade2021_SleepApnea_Mixed_Female_Male	SpO2per90	WGS	21245	34446064	15558739
Cade2021_SleepApnea_Mixed_Male	AHI	WGS	10549	34446064	15386600
Cade2021_SleepApnea_Mixed_Male	AvgDesaturation	WGS	10549	34446064	9785930
Cade2021_SleepApnea_Mixed_Male	SpO2avg	WGS	10549	34446064	15394924
Cade2021_SleepApnea_Mixed_Male	SpO2min	WGS	10549	34446064	15395032
Cade2021_SleepApnea_Mixed_Male	SpO2per90	WGS	10549	34446064	15399305
Cai2020_T2D_EU	T2D	GWAS	22326	33188205	8916750
Chan2022_PUV_Mixed	PUV	GWAS	23859	36124557	19527043
Chang2022_Asthma_AA	Asthma	GWAS	4182	36089080	14441006
Charmet2018_CAD_eu	CADinT1D	GWAS	3557	29695256	6723947
Chen2020_BCX_af	BasoCount	GWAS	15171	32888493	33579316
Chen2020_BCX_af	EosinCount	GWAS	15171	32888493	33601289
Chen2020_BCX_af	HbConc	GWAS	15171	32888493	34535248
Chen2020_BCX_af	Hematocrit	GWAS	15171	32888493	34535249
Chen2020_BCX_af	LymphoCount	GWAS	15171	32888493	34121866
Chen2020_BCX_af	MeanCorpHb	GWAS	15171	32888493	33708378
Chen2020_BCX_af	MeanCorpHbConc	GWAS	15171	32888493	33886217
Chen2020_BCX_af	MeanCorpVol	GWAS	15171	32888493	34344407
Chen2020_BCX_af	MonoCount	GWAS	15171	32888493	34118506
Chen2020_BCX_af	NeutCount	GWAS	15171	32888493	34122660
Chen2020_BCX_af	PlatCount	GWAS	15171	32888493	34542128
Chen2020_BCX_af	PlatVol	GWAS	15171	32888493	33706955
Chen2020_BCX_af	RBCDistWidth	GWAS	15171	32888493	34325791
Chen2020_BCX_af	RedCount	GWAS	15171	32888493	34344333
Chen2020_BCX_af	WBC	GWAS	15171	32888493	34529362
Chen2020_BCX_ea	BasoCount	GWAS	151807	32888493	15181661
Chen2020_BCX_ea	EosinCount	GWAS	151807	32888493	15174348
Chen2020_BCX_ea	HbConc	GWAS	151807	32888493	15603977
Chen2020_BCX_ea	Hematocrit	GWAS	151807	32888493	15183872
Chen2020_BCX_ea	LymphoCount	GWAS	151807	32888493	15183919
Chen2020_BCX_ea	MeanCorpHb	GWAS	151807	32888493	15181182
Chen2020_BCX_ea	MeanCorpHbConc	GWAS	151807	32888493	15183934
Chen2020_BCX_ea	MeanCorpVol	GWAS	151807	32888493	15181149
Chen2020_BCX_ea	MonoCount	GWAS	151807	32888493	15183895
Chen2020_BCX_ea	NeutCount	GWAS	151807	32888493	15183944
Chen2020_BCX_ea	PlatCount	GWAS	151807	32888493	15605339
Chen2020_BCX_ea	PlatVol	GWAS	151807	32888493	12525330
Chen2020_BCX_ea	RedCount	GWAS	151807	32888493	15604649
Chen2020_BCX_ea	WBC	GWAS	151807	32888493	15605487
Chen2020_BCX_eu	BasoCount	GWAS	563946	32888493	47035496
Chen2020_BCX_eu	EosinCount	GWAS	563946	32888493	46998985
Chen2020_BCX_eu	HbConc	GWAS	563946	32888493	47636912
Chen2020_BCX_eu	Hematocrit	GWAS	563946	32888493	47639467
Chen2020_BCX_eu	LymphoCount	GWAS	563946	32888493	47264262
Chen2020_BCX_eu	MeanCorpHb	GWAS	563946	32888493	47266227
Chen2020_BCX_eu	MeanCorpHbConc	GWAS	563946	32888493	47281194
Chen2020_BCX_eu	MeanCorpVol	GWAS	563946	32888493	47614769
Chen2020_BCX_eu	MonoCount	GWAS	563946	32888493	47260972
Chen2020_BCX_eu	NeutCount	GWAS	563946	32888493	47249267
Chen2020_BCX_eu	PlatCount	GWAS	563946	32888493	47249259
Chen2020_BCX_eu	PlatVol	GWAS	563946	32888493	46668171
Chen2020_BCX_eu	RBCDistWidth	GWAS	563946	32888493	46859169
Chen2020_BCX_eu	RedCount	GWAS	563946	32888493	47627325
Chen2020_BCX_eu	WBC	GWAS	563946	32888493	47600842
Chen2020_BCX_hs	BasoCount	GWAS	9368	32888493	23758884
Chen2020_BCX_hs	EosinCount	GWAS	9368	32888493	23758042
Chen2020_BCX_hs	HbConc	GWAS	9368	32888493	26810352
Chen2020_BCX_hs	Hematocrit	GWAS	9368	32888493	26810352
Chen2020_BCX_hs	LymphoCount	GWAS	9368	32888493	25652707
Chen2020_BCX_hs	MeanCorpHb	GWAS	9368	32888493	24999652
Chen2020_BCX_hs	MeanCorpHbConc	GWAS	9368	32888493	24999636
Chen2020_BCX_hs	MeanCorpVol	GWAS	9368	32888493	26810224
Chen2020_BCX_hs	MonoCount	GWAS	9368	32888493	25652698
Chen2020_BCX_hs	NeutCount	GWAS	9368	32888493	25652697
Chen2020_BCX_hs	PlatCount	GWAS	9368	32888493	26925389
Chen2020_BCX_hs	PlatVol	GWAS	9368	32888493	24878602
Chen2020_BCX_hs	RBCDistWidth	GWAS	9368	32888493	26792043
Chen2020_BCX_hs	RedCount	GWAS	9368	32888493	26810348
Chen2020_BCX_hs	WBC	GWAS	9368	32888493	26925380
Chen2020_BCX_META_mixed	BasoCount	GWAS	746667	32888493	67077972
Chen2020_BCX_META_mixed	EosinCount	GWAS	746667	32888493	67061880
Chen2020_BCX_META_mixed	HbConc	GWAS	746667	32888493	67816135
Chen2020_BCX_META_mixed	Hematocrit	GWAS	746667	32888493	67681914
Chen2020_BCX_META_mixed	LymphoCount	GWAS	746667	32888493	67211003
Chen2020_BCX_META_mixed	MeanCorpHb	GWAS	746667	32888493	67377432
Chen2020_BCX_META_mixed	MeanCorpHbConc	GWAS	746667	32888493	67527531
Chen2020_BCX_META_mixed	MeanCorpVol	GWAS	746667	32888493	67518484
Chen2020_BCX_META_mixed	MonoCount	GWAS	746667	32888493	67207613
Chen2020_BCX_META_mixed	NeutCount	GWAS	746667	32888493	67199967
Chen2020_BCX_META_mixed	PlatCount	GWAS	746667	32888493	67609861
Chen2020_BCX_META_mixed	PlatVol	GWAS	746667	32888493	65359445
Chen2020_BCX_META_mixed	RBCDistWidth	GWAS	746667	32888493	65174533
Chen2020_BCX_META_mixed	RedCount	GWAS	746667	32888493	67659922
Chen2020_BCX_META_mixed	WBC	GWAS	746667	32888493	67796603
Chen2023_AorticStenosis_EU	AorticStenosis	GWAS	653867	37038246	11591806
Chenji2021_Glycaemic_AA	2hrGadjBMI	GWAS	16579	34059833	21542089
Chenji2021_Glycaemic_AA	FGadjBMI	GWAS	16579	34059833	26399387
Chenji2021_Glycaemic_AA	FIadjBMI	GWAS	16579	34059833	24886015
Chenji2021_Glycaemic_AA	HBA1CadjBMI	GWAS	16579	34059833	25203950
Chenji2021_Glycaemic_AF	HBA1CadjBMI	GWAS	4441	34059833	18139138
Chenji2021_Glycaemic_EA	2hrGadjBMI	GWAS	35619	34059833	8474480
Chenji2021_Glycaemic_EA	FGadjBMI	GWAS	35619	34059833	14360046
Chenji2021_Glycaemic_EA	FIadjBMI	GWAS	35619	34059833	13690207
Chenji2021_Glycaemic_EA	HBA1CadjBMI	GWAS	35619	34059833	14636529
Chenji2021_Glycaemic_EU	2hrGadjBMI	GWAS	200622	34059833	27740163
Chenji2021_Glycaemic_EU	FGadjBMI	GWAS	200622	34059833	31618286
Chenji2021_Glycaemic_EU	FIadjBMI	GWAS	200622	34059833	30234568
Chenji2021_Glycaemic_EU	HBA1CadjBMI	GWAS	200622	34059833	31322199
Chenji2021_Glycaemic_HS	2hrGadjBMI	GWAS	19247	34059833	23266551
Chenji2021_Glycaemic_HS	FGadjBMI	GWAS	19247	34059833	26742228
Chenji2021_Glycaemic_HS	FIadjBMI	GWAS	19247	34059833	24769595
Chenji2021_Glycaemic_HS	HBA1CadjBMI	GWAS	19247	34059833	27765558
Chenji2021_Glycaemic_SA	2hrGadjBMI	GWAS	9525	34059833	NA
Chenji2021_Glycaemic_SA	FGadjBMI	GWAS	9525	34059833	18619145
Chenji2021_Glycaemic_SA	FIadjBMI	GWAS	9525	34059833	18439784
Chia2021_LBD_EU	LBD	GWAS	6618	33589841	7453136
Chia2022_MyastheniaGravis_EU	Myasthenia_gravis	GWAS	38243	35074870	22465930
Chia2022_MyastheniaGravis_EU	Myasthenia_gravis_early	GWAS	38243	35074870	17985151
Chia2022_MyastheniaGravis_EU	Myasthenia_gravis_late	GWAS	38243	35074870	21218491
Cho2015_EmphysemaAndAirway_Mixed	Perc15HUinCOPD	GWAS	12031	26030696	7567666
Cho2015_EmphysemaAndAirway_Mixed	PercLAA950inCOPD	GWAS	12031	26030696	7567666
Cho2015_EmphysemaAndAirway_Mixed	Pi10mminCOPD	GWAS	12031	26030696	7563974
Cho2015_EmphysemaAndAirway_Mixed	WAPinCOPD	GWAS	12031	26030696	7564070
Choi2021_ECGtraits_Mixed	PRI	WGS	28008	34319147	12032091
Choi2021_ECGtraits_Mixed	Pwave_duration	WGS	28008	34319147	11860049
Choi2021_ECGtraits_Mixed	QRS	WGS	28008	34319147	12023302
Choi2021_ECGtraits_Mixed	QTc	WGS	28008	34319147	12032095
Choi2021_ECGtraits_Mixed	RRinterval	WGS	28008	34319147	12017720
Choquet2018_POAG_Mixed	POAG	GWAS	240302	29891935	7751805
Choquet2020_CentralCornealThickness_Mixed	CCthickness	GWAS	44039	32528159	5529844
Choquet2021_Cataract_Mixed	CataractSenile	GWAS	585243	34127677	9436209
ExSeq_52kQT_AA	CHOL	ExSeq	6402	36280733	2071448
Choudhury2022_Lipids_SSAF	HDL	GWAS	24616	35546142	21617621
Choudhury2022_Lipids_SSAF	LDL	GWAS	24616	35546142	21629190
Choudhury2022_Lipids_SSAF	TG	GWAS	24616	35546142	21563900
Codd2021_LTL_Mixed	LTL	GWAS	472174	34611362	20134421
Coleman2020_Depression_EU	MDD	GWAS	92957	31969693	NA
Coleman2020_Depression_EU	MDD_NoTrauma	GWAS	92957	31969693	7788765
Coleman2020_Depression_EU	MDD_Trauma	GWAS	92957	31969693	7788765
Cordell2021_PBC_EU	PBC	GWAS	24510	34033851	4710348
Corvol2015_CF_Mixed	Lung_disease_inCF	GWAS	6365	26417704	7739943
Cousminer2018_LADA_T1D_eu	LADA	GWAS	8581	30254083	5194099
COVID19_HGI_r4_A1_ALL_eu	SeverevNonHospC19	GWAS	957	34237774	9303981
COVID19_HGI_r4_B2_ALL_eu	HospC19vAll	GWAS	908494	34237774	9866228
COVID19_HGI_r4_C1_ALL_mixed	C19vNeg	GWAS	127879	34237774	13060529
COVID19_HGI_r4_C2_ALL_eu	C19vAll	GWAS	1299010	34237774	11578462
COVID19_HGI_r4_D1_ALL_eu	PredC19vPredNoC19	GWAS	38932	34237774	11480651
COVID19_HGI_r6_A2_ALL_mixed	SevereC19vAll	GWAS	1010654	35922517	8141091
COVID19_HGI_r6_B1_ALL_mixed	HospvNonHospC19	GWAS	87671	35922517	13497469
COVID19_HGI_r6_B2_ALL_mixed	HospC19vAll	GWAS	2085803	35922517	11810319
COVID19_HGI_r6_C2_ALL_mixed	C19vAll	GWAS	2586691	35922517	12222969
Cuellar-Partida2020_Handedness_EU	Handedness	GWAS	1470460	32989287	11820208
Currant2021_Retina_EU	GCIPL	GWAS	31434	33979322	8612802
Currant2021_Retina_EU	RNFL	GWAS	31434	33979322	8612802
Currant2023_Photoreceptor_EU	ISthickness	GWAS	31135	36848389	8996904
Currant2023_Photoreceptor_EU	ONLthickness	GWAS	31135	36848389	8996904
Currant2023_Photoreceptor_EU	OSthickness	GWAS	31135	36848389	8996904
Dashti_2019_breakfast_skipping_eu	BreakfastSkipping	GWAS	193860	31190057	14661601
Davies2016_Education_EU	MemPerformance	GWAS	112067	27046643	15932102
Davies2016_Education_EU	ReactionTime	GWAS	112067	27046643	15932103
Davies2016_Education_EU	VerbNumReasoning	GWAS	112067	27046643	15947915
Day2017_MenarcheAge_EU	Men	GWAS	329345	28436984	10562209
Day2018_PCOS_EU	PCOS	GWAS	25295	30566500	8538521
Deelen2019_Longevity_EU	ExtremeLongevity_90thPerc	GWAS	36745	31413261	8078385
Deelen2019_Longevity_EU	ExtremeLongevity_99thPerc	GWAS	36745	31413261	7848967
deLange2017_CD_EU	CD	GWAS	40266	28067908	9253325
deLange2017_IBD_EU	IBD	GWAS	59957	28067908	9413848
deLange2017_UC_EU	UC	GWAS	45975	28067908	9270227
Dixon2022_ICP_EU	ICP	GWAS	154780	35977952	7379347
Doherty2018_PhysicalActivity_EU	PA_ModerateDur	GWAS	91105	30531941	8746006
Doherty2018_PhysicalActivity_EU	PA_OverallDur	GWAS	91105	30531941	8746006
Doherty2018_PhysicalActivity_EU	PA_SedentaryDur	GWAS	91105	30531941	8746006
Doherty2018_PhysicalActivity_EU	SleepDuration	GWAS	91105	30531941	8746006
Dubois2010_celiac_EU	Celiac	GWAS	15283	20190752	518769
Duckworth2020_IPF_EU	IPF	GWAS	437235	33197388	15466584
Eijsbouts2021_IBS_EU	IBS	GWAS	486601	34741163	9584951
Elsworth2018_UsualWalkingPace_EU	PA_UsualWalkPace	GWAS	459915	NA	9851866
Emdin2021_cirrhosis_eu	Cirrhosis	GWAS	77534	33310085	8283123
Eriksson2021_AddisonsDisease_EU	Addison	GWAS	5320	33574239	7021167
Estrada2018_NeuromyelitisOptica_EU	Neuromyelitis_optica	GWAS	2082	29769526	7137531
Estrada2018_NeuromyelitisOptica_EU	Neuromyelitis_optica_IgG_minus	GWAS	2082	29769526	6422953
Estrada2018_NeuromyelitisOptica_EU	Neuromyelitis_optica_IgG_plus	GWAS	2082	29769526	6803842
Evangelou2018_bp_eu	DBP	GWAS	757601	30224653	7160657
Evangelou2018_bp_eu	PulsePress	GWAS	757601	30224653	7088842
Evangelou2018_bp_eu	SBP	GWAS	757601	30224653	7088121
ExChip_AFGen	AF	ExChip	154432	28416797	47424
ExChip_BPGen	DBP	ExChip	192763	27618447	237928
ExChip_BPGen	HYPERTENSION	ExChip	192763	27618447	226231
ExChip_BPGen	PulsePress	ExChip	192763	27618447	237885
ExChip_BPGen	SBP	ExChip	192763	27618447	237925
ExChip_BPGen_eu	DBP	ExChip	165276	27618447	230020
ExChip_BPGen_eu	HYPERTENSION	ExChip	165276	27618447	218560
ExChip_BPGen_eu	PulsePress	ExChip	165276	27618447	229963
ExChip_BPGen_eu	SBP	ExChip	165276	27618447	230017
ExChip_CHARGE-1_eu	QRS	ExChip	77898	30012189	226733
ExChip_CHARGE-2_aa	QRS	ExChip	7695	30012220	176000
ExChip_EPRI	PRI	ExChip	92803	29748316	39046
ExChip_ExTexT2D	T2D	ExChip	228653	29632382	206479
ExChip_ExTexT2D	T2DadjBMI	ExChip	228653	29632382	206158
ExChip_ExTexT2D_eu	T2D	ExChip	177116	29632382	142818
ExChip_ExTexT2D_eu	T2DadjBMI	ExChip	177116	29632382	142516
ExChip_FUSION_eu	BMI	ExChip	3400	NA	86303
ExChip_FUSION_eu	CreatinineUrinary	ExChip	3400	NA	59799
ExChip_FUSION_eu	DBP	ExChip	3400	NA	86289
ExChip_FUSION_eu	FG	ExChip	3400	NA	76221
ExChip_FUSION_eu	FGadjBMI	ExChip	3400	NA	75760
ExChip_FUSION_eu	FI	ExChip	3400	NA	75741
ExChip_FUSION_eu	FIadjBMI	ExChip	3400	NA	75529
ExChip_FUSION_eu	HDL	ExChip	3400	NA	83833
ExChip_FUSION_eu	LDL	ExChip	3400	NA	82049
ExChip_FUSION_eu	SBP	ExChip	3400	NA	85632
ExChip_FUSION_eu	T2D	ExChip	3400	NA	151097
ExChip_FUSION_eu	T2DadjBMI	ExChip	3400	NA	71850
ExChip_GIANT	BMI	ExChip	718734	29273807	261524
ExChip_GIANT	HEIGHT	ExChip	718734	29273807	257354
ExChip_GIANT_aa	BMI	ExChip	27610	29273807	222672
ExChip_GIANT_aa	HEIGHT	ExChip	27610	29273807	227487
ExChip_GIANT_ea	BMI	ExChip	8839	29273807	104983
ExChip_GIANT_ea	HEIGHT	ExChip	8839	29273807	104983
ExChip_GIANT_eu	BMI	ExChip	449889	29273807	256806
ExChip_GIANT_eu	HEIGHT	ExChip	449889	29273807	257402
ExChip_GIANT_hs	BMI	ExChip	10772	29273807	208527
ExChip_GIANT_hs	HEIGHT	ExChip	10772	29273807	208524
ExChip_GIANT_sa	BMI	ExChip	29398	29273807	169780
ExChip_GIANT_sa	HEIGHT	ExChip	29398	29273807	169958
ExChip_GIANTwWHR	WHRadjBMI	ExChip	344369	30778226	179276
ExChip_GIANTwWHR_eu	WHRadjBMI	ExChip	288492	30778226	173686
ExChip_GIANTwWHR_eu_females	WHRadjBMI	ExChip	157516	30778226	169053
ExChip_GIANTwWHR_eu_males	WHRadjBMI	ExChip	130976	30778226	167816
ExChip_GIANTwWHR_females	WHRadjBMI	ExChip	180131	30778226	178354
ExChip_GIANTwWHR_males	WHRadjBMI	ExChip	164238	30778226	178154
Hindy2022_lipids_AF	CHOL	ExSeq	16507	34932938	996589
ExChip_GLGC	HDL	ExChip	370613	29083407	310154
ExChip_GLGC	LDL	ExChip	370613	29083407	310128
ExChip_GLGC	TG	ExChip	370613	29083407	310144
Graham_2021_lipids_AF	CHOL	GWAS	99432	34887591	33089937
ExChip_GLGC_ea	HDL	ExChip	47532	29083407	116931
ExChip_GLGC_ea	LDL	ExChip	47532	29083407	116931
ExChip_GLGC_ea	TG	ExChip	47532	29083407	116931
ExChip_GODARTS_EXOME	Adiponectin	ExChip	4863	NA	69408
ExChip_GODARTS_EXOME	BMI	ExChip	4863	NA	123611
ExSeq_52kQT_EA	CHOL	ExSeq	6031	36280733	1743288
ExChip_GODARTS_EXOME	CreatinineUrinary	ExChip	4863	NA	123624
ExChip_GODARTS_EXOME	DBP	ExChip	4863	NA	123502
ExChip_GODARTS_EXOME	eGFRcrea	ExChip	4863	NA	123624
ExChip_GODARTS_EXOME	FI	ExChip	4863	NA	123139
ExChip_GODARTS_EXOME	HBA1C	ExChip	4863	NA	70208
ExChip_GODARTS_EXOME	HDL	ExChip	4863	NA	123079
ExChip_GODARTS_EXOME	HEIGHT	ExChip	4863	NA	123626
ExChip_GODARTS_EXOME	LDL	ExChip	4863	NA	243708
ExChip_GODARTS_EXOME	SBP	ExChip	4863	NA	140416
ExChip_GODARTS_EXOME	T2D	ExChip	4863	NA	123636
ExChip_GODARTS_EXOME	TG	ExChip	4863	NA	123047
ExChip_GODARTS_EXOME	WAIST	ExChip	4863	NA	246222
ExChip_GODARTS_EXOME	WEIGHT	ExChip	4863	NA	123611
ExChip_MICAD	MI	ExChip	120575	26934567	214883
ExChip_SIGMA1	T2D	ExChip	8214	28838971	170677
ExChip_T2DGO	FG	ExChip	75670	27398621	113473
ExChip_T2DGO	FI	ExChip	75670	27398621	111627
ExSeq_52k	T2D	ExSeq	49147	31118516	6657043
ExSeq_52k_AA	T2D	ExSeq	6416	31118516	1976155
ExSeq_52k_EA	T2D	ExSeq	5920	31118516	1754089
ExSeq_52k_EU	T2D	ExSeq	12461	31118516	2040128
ExSeq_52k_HS	T2D	ExSeq	14464	31118516	2743603
ExSeq_52k_SA	T2D	ExSeq	5858	31118516	2030150
ExSeq_52kQT	2hrCPEP	ExSeq	49147	36280733	571740
ExSeq_52kQT	2hrG	ExSeq	49147	36280733	1629270
ExSeq_52kQT	2hrI	ExSeq	49147	36280733	1171208
ExSeq_52kQT	Adiponectin	ExSeq	49147	36280733	2303697
ExSeq_52kQT	BMI	ExSeq	49147	36280733	6777246
GWAS_CUHK_ea	CHOL	GWAS	6742	30415941	1259894
ExSeq_52kQT	CPEP_FAST	ExSeq	49147	36280733	950563
ExSeq_52kQT	DBP	ExSeq	49147	36280733	6131895
ExSeq_52kQT	FG	ExSeq	49147	36280733	4610464
ExSeq_52kQT	FI	ExSeq	49147	36280733	3734945
ExSeq_52kQT	HBA1C	ExSeq	49147	36280733	3328727
ExSeq_52kQT	HDL	ExSeq	49147	36280733	6153262
ExSeq_52kQT	HEIGHT	ExSeq	49147	36280733	6776181
ExSeq_52kQT	HIPC	ExSeq	49147	36280733	4764613
ExSeq_52kQT	HOMAB	ExSeq	49147	36280733	3654984
ExSeq_52kQT	HOMAIR	ExSeq	49147	36280733	3723112
ExSeq_52kQT	LDL	ExSeq	49147	36280733	6091397
ExSeq_52kQT	LEP	ExSeq	49147	36280733	1338554
ExSeq_52kQT	SBP	ExSeq	49147	36280733	6131455
ExSeq_52kQT	TG	ExSeq	49147	36280733	6162413
ExSeq_52kQT	TGtoHDL	ExSeq	49147	36280733	6095740
ExSeq_52kQT	WAIST	ExSeq	49147	36280733	5939649
ExSeq_52kQT	WHR	ExSeq	49147	36280733	5288828
ExSeq_52kQT_AA	Adiponectin	ExSeq	6402	36280733	982515
ExSeq_52kQT_AA	BMI	ExSeq	6402	36280733	2311365
Hindy2022_lipids_EA	CHOL	ExSeq	10420	34932938	618108
ExSeq_52kQT_AA	Creatinine	ExSeq	6402	36280733	1592309
ExSeq_52kQT_AA	DBP	ExSeq	6402	36280733	2115206
ExSeq_52kQT_AA	FG	ExSeq	6402	36280733	1571223
ExSeq_52kQT_AA	FI	ExSeq	6402	36280733	1095979
ExSeq_52kQT_AA	HBA1C	ExSeq	6402	36280733	1195913
ExSeq_52kQT_AA	HDL	ExSeq	6402	36280733	2070048
ExSeq_52kQT_AA	HEIGHT	ExSeq	6402	36280733	2313501
ExSeq_52kQT_AA	HOMAB	ExSeq	6402	36280733	1084011
ExSeq_52kQT_AA	HOMAIR	ExSeq	6402	36280733	1089798
ExSeq_52kQT_AA	LDL	ExSeq	6402	36280733	2064450
ExSeq_52kQT_AA	LEP	ExSeq	6402	36280733	875104
ExSeq_52kQT_AA	SBP	ExSeq	6402	36280733	2114572
ExSeq_52kQT_AA	TG	ExSeq	6402	36280733	2061054
ExSeq_52kQT_AA	TGtoHDL	ExSeq	6402	36280733	2059820
ExSeq_52kQT_AA	WAIST	ExSeq	6402	36280733	1283263
ExSeq_52kQT_AA	WHR	ExSeq	6402	36280733	818698
ExSeq_52kQT_EA	2hrCPEP	ExSeq	6031	36280733	415496
ExSeq_52kQT_EA	2hrG	ExSeq	6031	36280733	781722
ExSeq_52kQT_EA	2hrI	ExSeq	6031	36280733	779472
ExSeq_52kQT_EA	Adiponectin	ExSeq	6031	36280733	819958
ExSeq_52kQT_EA	BMI	ExSeq	6031	36280733	1762872
ExChip_GLGC_ea	CHOL	ExChip	47532	29083407	116931
ExSeq_52kQT_EA	CPEP_FAST	ExSeq	6031	36280733	629110
ExSeq_52kQT_EA	Creatinine	ExSeq	6031	36280733	1131447
ExSeq_52kQT_EA	DBP	ExSeq	6031	36280733	1763948
ExSeq_52kQT_EA	FG	ExSeq	6031	36280733	1255121
ExSeq_52kQT_EA	FI	ExSeq	6031	36280733	1222236
ExSeq_52kQT_EA	HBA1C	ExSeq	6031	36280733	1092342
ExSeq_52kQT_EA	HDL	ExSeq	6031	36280733	1743422
ExSeq_52kQT_EA	HEIGHT	ExSeq	6031	36280733	1763210
ExSeq_52kQT_EA	HIPC	ExSeq	6031	36280733	1763511
ExSeq_52kQT_EA	HOMAB	ExSeq	6031	36280733	1187142
ExSeq_52kQT_EA	HOMAIR	ExSeq	6031	36280733	1220052
ExSeq_52kQT_EA	LDL	ExSeq	6031	36280733	1726937
ExSeq_52kQT_EA	LEP	ExSeq	6031	36280733	NA
ExSeq_52kQT_EA	SBP	ExSeq	6031	36280733	1763507
ExSeq_52kQT_EA	TG	ExSeq	6031	36280733	1743120
ExSeq_52kQT_EA	TGtoHDL	ExSeq	6031	36280733	1742857
ExSeq_52kQT_EA	WAIST	ExSeq	6031	36280733	1760706
ExSeq_52kQT_EA	WHR	ExSeq	6031	36280733	1760626
ExSeq_52kQT_EU	2hrG	ExSeq	12221	36280733	558516
ExSeq_52kQT_EU	2hrI	ExSeq	12221	36280733	430019
ExSeq_52kQT_EU	Adiponectin	ExSeq	12221	36280733	1048980
ExSeq_52kQT_EU	BMI	ExSeq	12221	36280733	2367596
Graham_2021_lipids_EA	CHOL	GWAS	147492	34887591	16923803
ExSeq_52kQT_EU	CPEP_FAST	ExSeq	12221	36280733	243061
ExSeq_52kQT_EU	Creatinine	ExSeq	12221	36280733	1183872
ExSeq_52kQT_EU	DBP	ExSeq	12221	36280733	2120045
ExSeq_52kQT_EU	FG	ExSeq	12221	36280733	1552973
ExSeq_52kQT_EU	FI	ExSeq	12221	36280733	1434238
ExSeq_52kQT_EU	HBA1C	ExSeq	12221	36280733	856687
ExSeq_52kQT_EU	HDL	ExSeq	12221	36280733	2041120
ExSeq_52kQT_EU	HEIGHT	ExSeq	12221	36280733	2367416
ExSeq_52kQT_EU	HIPC	ExSeq	12221	36280733	1084638
ExSeq_52kQT_EU	HOMAB	ExSeq	12221	36280733	1389882
ExSeq_52kQT_EU	HOMAIR	ExSeq	12221	36280733	1424873
ExSeq_52kQT_EU	LDL	ExSeq	12221	36280733	2022174
ExSeq_52kQT_EU	LEP	ExSeq	12221	36280733	684812
ExSeq_52kQT_EU	SBP	ExSeq	12221	36280733	2120167
ExSeq_52kQT_EU	TG	ExSeq	12221	36280733	2046010
ExSeq_52kQT_EU	TGtoHDL	ExSeq	12221	36280733	2029121
ExSeq_52kQT_EU	WAIST	ExSeq	12221	36280733	2157319
ExSeq_52kQT_EU	WHR	ExSeq	12221	36280733	1549050
ExSeq_52kQT_HS	2hrCPEP	ExSeq	13617	36280733	271414
ExSeq_52kQT_HS	2hrG	ExSeq	13617	36280733	755948
ExSeq_52kQT_HS	2hrI	ExSeq	13617	36280733	300365
ExSeq_52kQT_HS	Adiponectin	ExSeq	13617	36280733	282438
ExSeq_52kQT_HS	BMI	ExSeq	13617	36280733	2724013
GWAS_BBJ_ea	CHOL	GWAS	191764	30718926	6115631
ExSeq_52kQT_HS	CPEP_FAST	ExSeq	13617	36280733	368187
ExSeq_52kQT_HS	Creatinine	ExSeq	13617	36280733	267983
ExSeq_52kQT_HS	DBP	ExSeq	13617	36280733	1967397
ExSeq_52kQT_HS	FG	ExSeq	13617	36280733	1745906
ExSeq_52kQT_HS	FI	ExSeq	13617	36280733	1363499
ExSeq_52kQT_HS	HBA1C	ExSeq	13617	36280733	770217
ExSeq_52kQT_HS	HDL	ExSeq	13617	36280733	2195659
ExSeq_52kQT_HS	HEIGHT	ExSeq	13617	36280733	2718579
ExSeq_52kQT_HS	HIPC	ExSeq	13617	36280733	2378845
ExSeq_52kQT_HS	HOMAB	ExSeq	13617	36280733	1337312
ExSeq_52kQT_HS	HOMAIR	ExSeq	13617	36280733	1363499
ExSeq_52kQT_HS	LDL	ExSeq	13617	36280733	2139460
ExSeq_52kQT_HS	LEP	ExSeq	13617	36280733	193349
ExSeq_52kQT_HS	SBP	ExSeq	13617	36280733	1967549
ExSeq_52kQT_HS	TG	ExSeq	13617	36280733	2296754
ExSeq_52kQT_HS	TGtoHDL	ExSeq	13617	36280733	2195112
ExSeq_52kQT_HS	WAIST	ExSeq	13617	36280733	2538756
ExSeq_52kQT_HS	WHR	ExSeq	13617	36280733	2365557
ExSeq_52kQT_SA	BMI	ExSeq	4110	36280733	1628320
Kim2022_MetabolicTraits_EA	CHOL	GWAS	288127	36333282	8278705
ExSeq_52kQT_SA	Creatinine	ExSeq	4110	36280733	1125660
ExSeq_52kQT_SA	DBP	ExSeq	4110	36280733	1629523
ExSeq_52kQT_SA	FG	ExSeq	4110	36280733	923277
ExSeq_52kQT_SA	FI	ExSeq	4110	36280733	456105
ExSeq_52kQT_SA	HBA1C	ExSeq	4110	36280733	1064105
ExSeq_52kQT_SA	HDL	ExSeq	4110	36280733	1592159
ExSeq_52kQT_SA	HEIGHT	ExSeq	4110	36280733	1629497
ExSeq_52kQT_SA	HIPC	ExSeq	4110	36280733	1418637
ExSeq_52kQT_SA	HOMAB	ExSeq	4110	36280733	456105
ExSeq_52kQT_SA	HOMAIR	ExSeq	4110	36280733	456105
ExSeq_52kQT_SA	LDL	ExSeq	4110	36280733	1577680
ExSeq_52kQT_SA	SBP	ExSeq	4110	36280733	1629523
ExSeq_52kQT_SA	TG	ExSeq	4110	36280733	1509636
ExSeq_52kQT_SA	TGtoHDL	ExSeq	4110	36280733	1509453
ExSeq_52kQT_SA	WAIST	ExSeq	4110	36280733	1416687
ExSeq_52kQT_SA	WHR	ExSeq	4110	36280733	1416687
ExSeq_EOMI	MI	ExSeq	22071	25487149	4696180
ExSeq_EOMI_aa	MI	ExSeq	1175	25487164	3761547
ExSeq_EOMI_eu	MI	ExSeq	13734	25487164	4030853
ExSeq_EOMI_sa	MI	ExSeq	6737	25487164	4144862
ExSeq_FinnMetSeq_eu	2hrFFA	ExSeq	19291	31367044	495429
ExSeq_FinnMetSeq_eu	2hrG	ExSeq	19291	31367044	495432
ExSeq_FinnMetSeq_eu	2hrI	ExSeq	19291	31367044	495149
ExSeq_FinnMetSeq_eu	AcAce	ExSeq	19291	31367044	521135
ExSeq_FinnMetSeq_eu	Ace	ExSeq	19291	31367044	521144
ExSeq_FinnMetSeq_eu	Adiponectin	ExSeq	19291	31367044	568214
ExSeq_FinnMetSeq_eu	Ala	ExSeq	19291	31367044	479598
ExSeq_FinnMetSeq_eu	Alb	ExSeq	19291	31367044	520571
ExSeq_FinnMetSeq_eu	ApoA1	ExSeq	19291	31367044	572629
ExSeq_FinnMetSeq_eu	ApoB	ExSeq	19291	31367044	572645
ExSeq_FinnMetSeq_eu	BFP	ExSeq	19291	31367044	531009
ExSeq_FinnMetSeq_eu	BMI	ExSeq	19291	31367044	637606
ExSeq_FinnMetSeq_eu	bOHBut	ExSeq	19291	31367044	511492
GWAS_GODARTS_BROAD	CHOL	GWAS	1884	NA	16973510
ExSeq_FinnMetSeq_eu	Cit	ExSeq	19291	31367044	521035
ExSeq_FinnMetSeq_eu	Creatinine	ExSeq	19291	31367044	617446
ExSeq_FinnMetSeq_eu	CRP	ExSeq	19291	31367044	621496
ExSeq_FinnMetSeq_eu	DBP	ExSeq	19291	31367044	637435
ExSeq_FinnMetSeq_eu	DHA	ExSeq	19291	31367044	479441
ExSeq_FinnMetSeq_eu	eGFRcrea	ExSeq	19291	31367044	617446
ExSeq_FinnMetSeq_eu	EtOH	ExSeq	19291	31367044	553298
ExSeq_FinnMetSeq_eu	FastFFA	ExSeq	19291	31367044	495798
ExSeq_FinnMetSeq_eu	FAw3	ExSeq	19291	31367044	479441
ExSeq_FinnMetSeq_eu	FAw6	ExSeq	19291	31367044	479441
ExSeq_FinnMetSeq_eu	FG	ExSeq	19291	31367044	498172
ExSeq_FinnMetSeq_eu	FI	ExSeq	19291	31367044	498969
ExSeq_FinnMetSeq_eu	Gln	ExSeq	19291	31367044	479306
ExSeq_FinnMetSeq_eu	Glol	ExSeq	19291	31367044	505728
ExSeq_FinnMetSeq_eu	Gly	ExSeq	19291	31367044	470383
ExSeq_FinnMetSeq_eu	Gp	ExSeq	19291	31367044	521108
ExSeq_FinnMetSeq_eu	HDL	ExSeq	19291	31367044	638114
ExSeq_FinnMetSeq_eu	HDL2chol	ExSeq	19291	31367044	521179
ExSeq_FinnMetSeq_eu	HDL3chol	ExSeq	19291	31367044	521179
ExSeq_FinnMetSeq_eu	HEIGHT	ExSeq	19291	31367044	637626
ExSeq_FinnMetSeq_eu	HIPCadjBMI	ExSeq	19291	31367044	637437
ExSeq_FinnMetSeq_eu	His	ExSeq	19291	31367044	479520
ExSeq_FinnMetSeq_eu	IDLchol	ExSeq	19291	31367044	521246
ExSeq_FinnMetSeq_eu	IDLpart	ExSeq	19291	31367044	521179
ExSeq_FinnMetSeq_eu	Ile	ExSeq	19291	31367044	479429
ExSeq_FinnMetSeq_eu	LDL	ExSeq	19291	31367044	544545
ExSeq_FinnMetSeq_eu	Leu	ExSeq	19291	31367044	479523
ExSeq_FinnMetSeq_eu	MUFA	ExSeq	19291	31367044	479441
ExSeq_FinnMetSeq_eu	n6FA182	ExSeq	19291	31367044	479441
ExSeq_FinnMetSeq_eu	PC	ExSeq	19291	31367044	520969
ExSeq_FinnMetSeq_eu	Phe	ExSeq	19291	31367044	479578
ExSeq_FinnMetSeq_eu	PUFA	ExSeq	19291	31367044	479441
ExSeq_FinnMetSeq_eu	PulsePress	ExSeq	19291	31367044	637425
ExSeq_FinnMetSeq_eu	Pyr	ExSeq	19291	31367044	519988
ExSeq_FinnMetSeq_eu	RemnantC	ExSeq	19291	31367044	521179
ExSeq_FinnMetSeq_eu	SBP	ExSeq	19291	31367044	637470
ExSeq_FinnMetSeq_eu	SFA	ExSeq	19291	31367044	479434
ExSeq_FinnMetSeq_eu	SM	ExSeq	19291	31367044	520969
ExSeq_FinnMetSeq_eu	TG	ExSeq	19291	31367044	545290
ExSeq_FinnMetSeq_eu	TotCho	ExSeq	19291	31367044	520969
ExSeq_FinnMetSeq_eu	TotPG	ExSeq	19291	31367044	520969
ExSeq_FinnMetSeq_eu	Tyr	ExSeq	19291	31367044	479484
ExSeq_FinnMetSeq_eu	Val	ExSeq	19291	31367044	479553
ExSeq_FinnMetSeq_eu	VitD	ExSeq	19291	31367044	385113
ExSeq_FinnMetSeq_eu	VLDLchol	ExSeq	19291	31367044	521179
ExSeq_FinnMetSeq_eu	WAISTadjBMI	ExSeq	19291	31367044	637448
ExSeq_FinnMetSeq_eu	WEIGHT	ExSeq	19291	31367044	637625
ExSeq_FinnMetSeq_eu	WHRadjBMI	ExSeq	19291	31367044	637424
ExSeq_FinnMetSeq_eu	XXLVLDLpart	ExSeq	19291	31367044	521246
ExSeq_FinnMetSeqFemales_eu	WHRadjBMI	ExSeq	4927	31367044	421753
ExSeq_RSNG	AF	ExSeq	11157	27589061	17396
ExSeq_UKBiobankAF_eu	AF	ExSeq	43139	31691645	173855
Eyre2012_RhA_EU	RhA	IChip	47580	23143596	112270
Fairfield2022_NAFLD_EU	NAFLD	GWAS	377988	34535985	8912795
Nicolas2018_ALS_EU	ALS	GWAS	80610	29566793	8959015
Fernandez-Rhodes2022_Anthropometric_HS	BMI	GWAS	59771	35399580	8605167
Fernandez-Rhodes2022_Anthropometric_HS	HEIGHT	GWAS	59771	35399580	8681118
Fernandez-Rhodes2022_Anthropometric_HS	WHRadjBMI	GWAS	59771	35399580	8402611
Fernandez-Rhodes2022_Anthropometric_Mixed	BMI	GWAS	350741	35399580	2426859
Fernandez-Rhodes2022_Anthropometric_Mixed	HEIGHT	GWAS	350741	35399580	2427132
Fernandez-Rhodes2022_Anthropometric_Mixed	WHRadjBMI	GWAS	350741	35399580	2401567
Ferreira2017_allergy_EU	Allergy	GWAS	360838	29083406	7871156
Ferreira2019_Asthma_EU	Asthma_AdultOnset	GWAS	327253	30929738	8796983
Ferreira2019_Asthma_EU	Asthma_ChildhoodOnset	GWAS	327253	30929738	8832120
Forgetta2020_T1D_EU	T1D	GWAS	24840	32005708	12837164
Freidin2019_BackPain_EU_discovery	BackPain	GWAS	350000	30747904	14852147
Freidin2019_BackPain_EU_meta_analysis	BackPain	GWAS	453862	30747904	12768927
Garcia-Etxebarria2022_IBD_EU	CD	GWAS	1433	35232999	5410498
Garcia-Etxebarria2022_IBD_EU	IBD	GWAS	1433	35232999	5410804
Gaulton_UKBB_meta_eu	T1D	GWAS	520580	34012112	61947114
Gharahkhani2016_BarretsEsophagus_EU	BarretsEsophagus	GWAS	23326	27527254	11229070
Gharahkhani2021_POAG_EA	POAG	GWAS	46523	33627673	10726201
Gharahkhani2021_POAG_EU	POAG	GWAS	216257	33627673	13906000
Gharahkhani2021_POAG_Mixed	POAG	GWAS	383500	33627673	14309216
Gharahkhani2021_POAG_SSAF	POAG	GWAS	6072	33627673	14965719
Ghodsian2021_NAFLD_EU	NAFLD	GWAS	778614	34841290	6797908
Gorski2021_eGFRcreaDecline_Mixed	eGFRcreaCKDi25	GWAS	195145	33137338	8641120
Gorski2021_eGFRcreaDecline_Mixed	eGFRcreaRapid3	GWAS	195145	33137338	8034157
Gorski2022_eGFRcreaDecline_Mixed	eGFRcrea_med_DeclineAdjBL	GWAS	343339	35716955	8443727
Gorski2022_eGFRcreaDecline_Mixed	eGFRcrea_med_DeclineAdjDM	GWAS	343339	35716955	12403901
Gorski2022_eGFRcreaDecline_Mixed	eGFRcrea_med_DeclineInCKD	GWAS	343339	35716955	6981266
Gorski2022_eGFRcreaDecline_Mixed	eGFRcrea_med_DeclineInDM	GWAS	343339	35716955	9935748
GPC2015_Neuroticism_EU	Neuroticism	GWAS	63661	25993607	6947795
Graff2021_Height_AA_Female	HEIGHT	GWAS	25369	33713608	18793171
Graff2021_Height_AA_Male	HEIGHT	GWAS	16021	33713608	18706352
Graff2021_Height_AA_Male_Female	HEIGHT	GWAS	41389	33713608	18784694
GWAS_HOORN_2019_DCS	CHOL	GWAS	1997	NA	16062380
Graham_2021_lipids_AF	HDL	GWAS	99432	34887591	32911864
Graham_2021_lipids_AF	LDL	GWAS	99432	34887591	32920337
Graham_2021_lipids_AF	nonHDL	GWAS	99432	34887591	28500238
Graham_2021_lipids_AF	TG	GWAS	99432	34887591	33022026
GWAS_GODARTS_ILLUMINA	CHOL	GWAS	2902	NA	19746315
Graham_2021_lipids_EA	HDL	GWAS	147492	34887591	16523708
Graham_2021_lipids_EA	LDL	GWAS	147492	34887591	15215171
Graham_2021_lipids_EA	nonHDL	GWAS	147492	34887591	16379327
Graham_2021_lipids_EA	TG	GWAS	147492	34887591	15243733
GWAS_GODARTS_AFFYMETRIX	CHOL	GWAS	2917	NA	20189684
Graham_2021_lipids_EU	HDL	GWAS	1320016	34887591	46130360
Graham_2021_lipids_EU	LDL	GWAS	1320016	34887591	46003791
Graham_2021_lipids_EU	nonHDL	GWAS	1320016	34887591	39947207
Graham_2021_lipids_EU	TG	GWAS	1320016	34887591	46193571
GWAS_HOORN_2018_DCS	CHOL	GWAS	3414	NA	17663992
Graham_2021_lipids_HS	HDL	GWAS	49582	34887591	26949994
Graham_2021_lipids_HS	LDL	GWAS	49582	34887591	26245104
Graham_2021_lipids_HS	nonHDL	GWAS	49582	34887591	18323441
Graham_2021_lipids_HS	TG	GWAS	49582	34887591	26290565
ExChip_GODARTS_EXOME	CHOL	ExChip	4863	NA	123079
Graham_2021_lipids_Mixed	HDL	GWAS	1654950	34887591	51703348
Graham_2021_lipids_Mixed	LDL	GWAS	1654950	34887591	49726150
Graham_2021_lipids_Mixed	nonHDL	GWAS	1654950	34887591	48718980
Graham_2021_lipids_Mixed	TG	GWAS	1654950	34887591	50185898
GWAS_GODARTS_METABO	CHOL	GWAS	7119	NA	125548
Graham_2021_lipids_SA	HDL	GWAS	40963	34887591	16760118
Graham_2021_lipids_SA	LDL	GWAS	40963	34887591	16749939
Graham_2021_lipids_SA	nonHDL	GWAS	40963	34887591	16493101
Graham_2021_lipids_SA	TG	GWAS	40963	34887591	16762872
Gurdasani2019_UGR_metabolic_traits_af	Alb	GWAS	14126	31675503	25395174
Gurdasani2019_UGR_metabolic_traits_af	ALP	GWAS	14126	31675503	25260999
Gurdasani2019_UGR_metabolic_traits_af	ALT	GWAS	14126	31675503	25238119
Gurdasani2019_UGR_metabolic_traits_af	AST	GWAS	14126	31675503	24216554
Gurdasani2019_UGR_metabolic_traits_af	BasoCount	GWAS	14126	31675503	17389581
Gurdasani2019_UGR_metabolic_traits_af	BILIRUBIN	GWAS	14126	31675503	25269426
Gurdasani2019_UGR_metabolic_traits_af	BMI	GWAS	14126	31675503	25386781
GWAS_EXTEND	CHOL	GWAS	7159	NA	NA
Gurdasani2019_UGR_metabolic_traits_af	DBP	GWAS	14126	31675503	25439621
Gurdasani2019_UGR_metabolic_traits_af	EosinCount	GWAS	14126	31675503	17385852
Gurdasani2019_UGR_metabolic_traits_af	GGT	GWAS	14126	31675503	24216554
Gurdasani2019_UGR_metabolic_traits_af	Hb	GWAS	14126	31675503	17381621
Gurdasani2019_UGR_metabolic_traits_af	HBA1C	GWAS	14126	31675503	15795435
Gurdasani2019_UGR_metabolic_traits_af	HDL	GWAS	14126	31675503	24525619
Gurdasani2019_UGR_metabolic_traits_af	HEIGHT	GWAS	14126	31675503	25377832
Gurdasani2019_UGR_metabolic_traits_af	Hematocrit	GWAS	14126	31675503	17381856
Gurdasani2019_UGR_metabolic_traits_af	HIPC	GWAS	14126	31675503	25372817
Gurdasani2019_UGR_metabolic_traits_af	LDL	GWAS	14126	31675503	24540629
Gurdasani2019_UGR_metabolic_traits_af	LymphoCount	GWAS	14126	31675503	17389581
Gurdasani2019_UGR_metabolic_traits_af	MeanCorpHb	GWAS	14126	31675503	17381569
Gurdasani2019_UGR_metabolic_traits_af	MeanCorpHbConc	GWAS	14126	31675503	17381856
Gurdasani2019_UGR_metabolic_traits_af	MeanCorpVol	GWAS	14126	31675503	17381569
Gurdasani2019_UGR_metabolic_traits_af	MonoCount	GWAS	14126	31675503	17389581
Gurdasani2019_UGR_metabolic_traits_af	NeutCount	GWAS	14126	31675503	17385852
Gurdasani2019_UGR_metabolic_traits_af	PlatCount	GWAS	14126	31675503	17389588
Gurdasani2019_UGR_metabolic_traits_af	RBCDistWidth	GWAS	14126	31675503	17381856
Gurdasani2019_UGR_metabolic_traits_af	RedCount	GWAS	14126	31675503	17381856
Gurdasani2019_UGR_metabolic_traits_af	SBP	GWAS	14126	31675503	25372319
Gurdasani2019_UGR_metabolic_traits_af	TG	GWAS	14126	31675503	25378774
Gurdasani2019_UGR_metabolic_traits_af	WAIST	GWAS	14126	31675503	25373559
Gurdasani2019_UGR_metabolic_traits_af	WBC	GWAS	14126	31675503	17381733
Gurdasani2019_UGR_metabolic_traits_af	WEIGHT	GWAS	14126	31675503	25383295
Gurdasani2019_UGR_metabolic_traits_af	WHR	GWAS	14126	31675503	25384957
GWAS_70kForT2D	T2D	GWAS	70127	29358691	15173783
GWAS_70kForT2D_chrXfemales	T2D	GWAS	39344	29358691	431228
GWAS_70kForT2D_chrXmales	T2D	GWAS	27598	29358691	431228
GWAS_70kForT2D_noDIAGRAM	T2D	GWAS	57968	29358691	13593908
GWAS_AAGILE	FG	GWAS	77501	27321945	2814214
GWAS_AAGILE	FIadjBMI	GWAS	77501	27321945	2812674
GWAS_Accel_eu	MeanSleepDiurnalInactRN	GWAS	85670	30952852	11998901
GWAS_Accel_eu	MeanSleepDurationRN	GWAS	85670	30952852	11998377
GWAS_Accel_eu	MeanSleepEfficiencyRN	GWAS	85670	30952852	11998876
GWAS_Accel_eu	MeanSleepL5timeRN	GWAS	85670	30952852	11998429
GWAS_Accel_eu	MeanSleepM10timeRN	GWAS	85670	30952852	11998208
GWAS_Accel_eu	MeanSleepMidPointRN	GWAS	85670	30952852	11998876
GWAS_Accel_eu	MeanSleepNumEpisodesRN	GWAS	85670	30952852	11998876
GWAS_Accel_eu	StDevSleepDurationRN	GWAS	85670	30952852	11998825
GWAS_ADIPOGen	Adiponectin	GWAS	45891	22479202	2607771
GWAS_AFHRC	AF	GWAS	588190	29892015	12149713
GWAS_AFHRC_AFGen	AF	GWAS	133073	28416818	10782549
GWAS_AGEN_ea	T2D	GWAS	433540	32499634	11836832
GWAS_AMDGen	AMD	GWAS	57600	23455636	2426381
GWAS_AMDGen	GA	GWAS	57600	23455636	2430374
GWAS_AMDGen	ND	GWAS	57600	23455636	2412718
GWAS_BBJ_ea	AF	GWAS	191764	30718926	5023374
GWAS_BBJ_ea	Alb	GWAS	191764	30718926	6115631
GWAS_BBJ_ea	ALP	GWAS	191764	30718926	6115631
GWAS_BBJ_ea	ALT	GWAS	191764	30718926	6115631
GWAS_BBJ_ea	AST	GWAS	191764	30718926	6115631
GWAS_BBJ_ea	BILIRUBIN	GWAS	191764	30718926	6115631
GWAS_BBJ_ea	BMI	GWAS	191764	30718926	5968207
GWAS_BBJ_ea	BS	GWAS	191764	30718926	6115631
GWAS_BBJ_ea	BUN	GWAS	191764	30718926	6115631
GWAS_BBJ_ea	Ca	GWAS	191764	30718926	6115631
GWAS_OXBB	CHOL	GWAS	7193	NA	126193
GWAS_BBJ_ea	CK	GWAS	191764	30718926	6115631
GWAS_BBJ_ea	Cl	GWAS	191764	30718926	6115631
GWAS_BBJ_ea	Creatinine	GWAS	191764	30718926	6115631
GWAS_BBJ_ea	CRP	GWAS	191764	30718926	6115631
GWAS_BBJ_ea	DBP	GWAS	191764	30718926	6115631
GWAS_BBJ_ea	eGFRcrea	GWAS	191764	30718926	6115631
GWAS_BBJ_ea	Fbg	GWAS	191764	30718926	6115631
GWAS_BBJ_ea	GGT	GWAS	191764	30718926	6115631
GWAS_BBJ_ea	Hb	GWAS	191764	30718926	6115631
GWAS_BBJ_ea	HBA1C	GWAS	191764	30718926	6115631
GWAS_BBJ_ea	HDL	GWAS	191764	30718926	6115631
GWAS_BBJ_ea	K	GWAS	191764	30718926	6115631
GWAS_BBJ_ea	LDH	GWAS	191764	30718926	6115631
GWAS_BBJ_ea	LDL	GWAS	191764	30718926	6115631
GWAS_BBJ_ea	MAP	GWAS	191764	30718926	6115631
GWAS_BBJ_ea	Men	GWAS	191764	30718926	9300071
GWAS_BBJ_ea	MP	GWAS	191764	30718926	9300071
GWAS_BBJ_ea	P	GWAS	191764	30718926	6115631
GWAS_BBJ_ea	POAG	GWAS	191764	30718926	5968035
GWAS_BBJ_ea	PulsePress	GWAS	191764	30718926	6115631
GWAS_BBJ_ea	SBP	GWAS	191764	30718926	6115631
GWAS_BBJ_ea	Sodium	GWAS	191764	30718926	6115631
GWAS_BBJ_ea	T2D	GWAS	191764	30718926	12571953
GWAS_BBJ_ea	TG	GWAS	191764	30718926	6115631
GWAS_BBJ_ea	UA	GWAS	191764	30718926	6115631
GWAS_BBJfemales_ea	BMI	GWAS	72390	29403010	11936414
GWAS_BBJfemales_ea	POAG	GWAS	72390	29403010	147424
GWAS_BBJmales_ea	BMI	GWAS	85894	29403010	11936414
GWAS_BBJmales_ea	POAG	GWAS	85894	29403010	147422
GWAS_BFpercent	BFP	GWAS	100716	26833246	3189682
GWAS_BioMe	BMI	GWAS	9361	NA	1260535
GWAS_BioMe	CADinT2D	GWAS	9361	NA	1357795
GWAS_BioMe	CKDinT2D	GWAS	9361	NA	1347160
GWAS_BioMe	ClaudicationinT2D	GWAS	9361	NA	1353472
GWAS_BioMe	Creatinine	GWAS	9361	NA	1238939
GWAS_BioMe	DBP	GWAS	9361	NA	1267204
GWAS_BioMe	eGFRcrea	GWAS	9361	NA	1233200
GWAS_BioMe	ESRDinT2D	GWAS	9361	NA	1349534
GWAS_BioMe	FG	GWAS	9361	NA	1175375
GWAS_BioMe	FGadjBMI	GWAS	9361	NA	1171245
GWAS_BioMe	HBA1C	GWAS	9361	NA	1160778
GWAS_BioMe	HBA1CadjBMI	GWAS	9361	NA	1155599
GWAS_BioMe	HDL	GWAS	9361	NA	1183560
GWAS_BioMe	HypertensioninT2D	GWAS	9361	NA	1355282
GWAS_BioMe	LDL	GWAS	9361	NA	1181927
GWAS_BioMe	MIinT2D	GWAS	9361	NA	1354777
GWAS_BioMe	NeuropathyinT2D	GWAS	9361	NA	1350344
GWAS_BioMe	PVDinT2D	GWAS	9361	NA	1357337
GWAS_BioMe	SBP	GWAS	9361	NA	1267295
GWAS_BioMe	StrokeinT2D	GWAS	9361	NA	1352880
GWAS_BioMe	T2D	GWAS	9361	NA	1398984
GWAS_BioMe	T2DadjBMI	GWAS	9361	NA	1390589
GWAS_CADISP	Stroke_ischemic	GWAS	9814	NA	9422519
GWAS_CADISP	toastCE	GWAS	9814	NA	9423542
GWAS_CADISP	toastDETER	GWAS	9814	NA	8514992
GWAS_CADISP	toastLAA	GWAS	9814	NA	9312274
GWAS_CADISP	toastSAO	GWAS	9814	NA	8961221
GWAS_CADISP	toastUNDETER	GWAS	9814	NA	9425441
GWAS_CADMETA_eu	CAD	GWAS	547261	29212778	7958718
GWAS_CADMETA_UKBB_eu	CAD	GWAS	296525	29212778	7958718
GWAS_CADT2D	CAD	GWAS	265678	28869590	7916742
GWAS_CADT2D	CADinNonT2D	GWAS	265678	28869590	7916742
GWAS_CADT2D	CADinT2D	GWAS	265678	28869590	7916742
GWAS_CADT2D	T2D	GWAS	265678	28869590	7916742
GWAS_CAMP	BMI	GWAS	3419	NA	297790
GWAS_CAMP	DBP	GWAS	3419	NA	295978
GWAS_CAMP	FG	GWAS	3419	NA	289687
GWAS_CAMP	FGadjBMI	GWAS	3419	NA	290943
GWAS_CAMP	FI	GWAS	3419	NA	289116
GWAS_CAMP	FIadjBMI	GWAS	3419	NA	290465
GWAS_CAMP	HBA1C	GWAS	3419	NA	261555
GWAS_CAMP	HBA1CadjBMI	GWAS	3419	NA	261555
GWAS_CAMP	HDL	GWAS	3419	NA	289833
GWAS_CAMP	LDL	GWAS	3419	NA	289865
GWAS_CAMP	SBP	GWAS	3419	NA	297354
GWAS_CAMP	T2D	GWAS	3419	NA	357946
GWAS_CAMP	T2DadjBMI	GWAS	3419	NA	357719
GWAS_CDKGen-Tin2019Urate_eu	Urate	GWAS	288666	31578528	8217029
GWAS_CDKGen-Tin2019Urate_mixed	Urate	GWAS	457706	31578528	8249580
GWAS_CKDGenConsortium	BUN	GWAS	765348	31152163	8185124
GWAS_CKDGenConsortium	CKD	GWAS	765348	31152163	9596477
GWAS_CKDGenConsortium	eGFRcrea	GWAS	765348	31152163	8285358
GWAS_CKDGenConsortium	MA	GWAS	765348	31152163	2192584
GWAS_CKDGenConsortium_eu	BUN	GWAS	110517	28452372	8367205
GWAS_CKDGenConsortium_eu	CKD	GWAS	110517	28452372	9172445
GWAS_CKDGenConsortium_eu	eGFRcrea	GWAS	110517	28452372	8895508
GWAS_CKDGenConsortiumGFRcys	eGFRcys	GWAS	20063	20383146	8517733
GWAS_CKDGenConsortiumMA	MA	GWAS	348954	31511532	8334882
GWAS_CKDGenConsortiumUACR	UACR	GWAS	564257	31511532	8043238
GWAS_CKDGenConsortiumUACR_aa	UACR	GWAS	6795	31511532	10070738
GWAS_CKDGenConsortiumUACR_eu	UACR	GWAS	547361	31511532	8613110
GWAS_COGENTK	eGFRcrea	GWAS	204402	30604766	6613596
GWAS_CRP_eu	CRP	GWAS	312468	30388399	9238461
GWAS_CUHK_ea	BMI	GWAS	6742	30415941	1259894
GWAS_CUHK_ea	CADinT2D	GWAS	6742	30415941	1259894
Prins2017_Biomarkers_EU	CHOL	GWAS	9961	28887542	23612730
GWAS_CUHK_ea	CKDinT2D	GWAS	6742	30415941	1259894
GWAS_CUHK_ea	CVDinT2D	GWAS	6742	30415941	1259894
GWAS_CUHK_ea	eGFRcrea	GWAS	6742	30415941	1259894
GWAS_CUHK_ea	ESRDinT2D	GWAS	6742	30415941	1251975
GWAS_CUHK_ea	FI	GWAS	6742	30415941	1259894
GWAS_CUHK_ea	HDL	GWAS	6742	30415941	1259894
GWAS_CUHK_ea	HEIGHT	GWAS	6742	30415941	1259894
GWAS_CUHK_ea	HOMAB	GWAS	6742	30415941	1259894
GWAS_CUHK_ea	IGI	GWAS	6742	30415941	1259894
GWAS_CUHK_ea	LDL	GWAS	6742	30415941	1259894
GWAS_CUHK_ea	MA	GWAS	6742	30415941	1259894
GWAS_CUHK_ea	MacrovControl	GWAS	6742	30415941	1259894
GWAS_CUHK_ea	T2D	GWAS	6742	30415941	1259894
GWAS_CUHK_ea	TG	GWAS	6742	30415941	1259894
GWAS_CUHK_ea	UACR	GWAS	6742	30415941	1259894
GWAS_CUHK_ea	WAIST	GWAS	6742	30415941	1259894
GWAS_DCSP2_ea	FI	GWAS	1896	NA	905472
GWAS_DCSP2_ea	FIadjBMI	GWAS	1896	NA	902334
GWAS_DCSP2LB_ea	FG	GWAS	3515	NA	1027255
GWAS_DCSP2LB_ea	FGadjBMI	GWAS	3515	NA	1029945
GWAS_DCSP2LBSEED	BMI	GWAS	12109	32936915	1062101
GWAS_DCSP2LBSEED	Creatinine	GWAS	12109	32936915	1062686
GWAS_DCSP2LBSEED	DBP	GWAS	12109	32936915	1062050
GWAS_DCSP2LBSEED	eGFRcrea	GWAS	12109	32936915	1062796
GWAS_DCSP2LBSEED	HBA1C	GWAS	12109	32936915	1032753
GWAS_DCSP2LBSEED	HBA1CadjBMI	GWAS	12109	32936915	1034842
GWAS_DCSP2LBSEED	HDL	GWAS	12109	32936915	1043405
GWAS_DCSP2LBSEED	LDL	GWAS	12109	32936915	1037346
GWAS_DCSP2LBSEED	SBP	GWAS	12109	32936915	1053488
GWAS_DCSP2SEED	T2D	GWAS	10248	NA	923770
GWAS_DCSP2SEED	T2DadjBMI	GWAS	10248	NA	923001
GWAS_DeCODE_eu	FNarea	GWAS	29059	31053729	14710535
GWAS_DeCODE_eu	IntertrochArea	GWAS	29059	31053729	14710535
GWAS_DeCODE_eu	LSarea	GWAS	29059	31053729	14710535
GWAS_DeCODE_eu	TotHipArea	GWAS	29059	31053729	14710535
GWAS_DeCODE_eu	TrochanterArea	GWAS	29059	31053729	14710535
GWAS_DiabeticRetino_aa	DRvNoDR	GWAS	2611	30487263	12947628
GWAS_DiabeticRetino_aa	DRvNoDRwDoD	GWAS	2611	30487263	12947236
GWAS_DiabeticRetino_aa	NPDRvNoDR	GWAS	2611	30487263	13048258
GWAS_DiabeticRetino_aa	NPDRvNoDRwDoD	GWAS	2611	30487263	13281494
GWAS_DiabeticRetino_aa	PDRvNoDR	GWAS	2611	30487263	14884074
GWAS_DiabeticRetino_aa	PDRvNoDRwDoD	GWAS	2611	30487263	14880833
GWAS_DiabeticRetino_aa	PDRvNoPDR	GWAS	2611	30487263	13384790
GWAS_DiabeticRetino_aa	PDRvNoPDRwDoD	GWAS	2611	30487263	13384408
GWAS_DiabeticRetino_eu	DRvNoDR	GWAS	3246	30487263	7794591
GWAS_DiabeticRetino_eu	DRvNoDRwDoD	GWAS	3246	30487263	7794980
GWAS_DiabeticRetino_eu	NPDRvNoDR	GWAS	3246	30487263	7006232
GWAS_DiabeticRetino_eu	NPDRvNoDRwDoD	GWAS	3246	30487263	7002799
GWAS_DiabeticRetino_eu	PDRvNoDR	GWAS	3246	30487263	7982624
GWAS_DiabeticRetino_eu	PDRvNoDRwDoD	GWAS	3246	30487263	7982027
GWAS_DiabeticRetino_eu	PDRvNoPDR	GWAS	3246	30487263	7843013
GWAS_DiabeticRetino_eu	PDRvNoPDRwDoD	GWAS	3246	30487263	7849755
GWAS_DIAGRAM	T2D	GWAS	110452	24509480	2898658
GWAS_DIAGRAM_eu_onlyGWAS	T2D	GWAS	69033	22885922	2472391
GWAS_DIAGRAM_mixed	T2D	GWAS	149821	22885922	127855
GWAS_DIAGRAM_mixed_females	T2D	GWAS	74998	22885922	118353
GWAS_DIAGRAM_mixed_males	T2D	GWAS	74823	22885922	123489
GWAS_DIAGRAM_mixed_onlyMetaboChip	T2D	GWAS	84780	22885922	137001
GWAS_DIAGRAMimputed_eu	T2D	GWAS	159208	28566273	12071468
GWAS_DIAGRAMimputed_eu	T2DadjBMI	GWAS	159208	28566273	11008488
GWAS_DIAMANTE_eu	T2DadjBMI	GWAS	898130	30297969	21663430
GWAS_DNCRI	allDKD_T1D	GWAS	19327	31537649	10346666
GWAS_DNCRI	allDKDadjHbA1cBMI_T1D	GWAS	19327	31537649	10218959
GWAS_DNCRI	CKD_T1D	GWAS	19327	31537649	9569312
GWAS_DNCRI	CKDadjHbA1cBMI_T1D	GWAS	19327	31537649	9249753
GWAS_DNCRI	CKDextremes_T1D	GWAS	19327	31537649	8589947
GWAS_DNCRI	CKDextremesadjHbA1cBMI_T1D	GWAS	19327	31537649	8254926
GWAS_DNCRI	CKDpDKD_T1D	GWAS	19327	31537649	9017942
GWAS_DNCRI	CKDpDKDadjHbA1cBMI_T1D	GWAS	19327	31537649	8448905
GWAS_DNCRI	ESRDvControl_T1D	GWAS	19327	31537649	8534774
GWAS_DNCRI	ESRDvControladjHbA1cBMI_T1D	GWAS	19327	31537649	8224939
GWAS_DNCRI	ESRDvMacro_T1D	GWAS	19327	31537649	8292126
GWAS_DNCRI	ESRDvMacroadjHbA1cBMI_T1D	GWAS	19327	31537649	7553153
GWAS_DNCRI	ESRDvNonESRD_T1D	GWAS	19327	31537649	8553969
GWAS_DNCRI	ESRDvNonESRDadjHbA1cBMI_T1D	GWAS	19327	31537649	8261063
GWAS_DNCRI	lateDKD_T1D	GWAS	19327	31537649	9908492
GWAS_DNCRI	lateDKDadjHbA1cBMI_T1D	GWAS	19327	31537649	9516519
GWAS_DNCRI	MA_T1D	GWAS	19327	31537649	9389533
GWAS_DNCRI	MAadjHbA1cBMI_T1D	GWAS	19327	31537649	9374837
GWAS_DNCRI	MacrovControl_T1D	GWAS	19327	31537649	9341289
GWAS_DNCRI	MacrovControladjHbA1cBMI_T1D	GWAS	19327	31537649	9171505
GWAS_EAGLE_eu	ChildSleepDuration	GWAS	10554	27568811	7775270
GWAS_EAGLE_eu	ChildSleepDurationAdjBMI	GWAS	10554	27568811	8010778
GWAS_EGGC	ChildObesity	GWAS	13848	22484627	2443664
GWAS_Exeter-Casanova2019UACR_eu	UACR	GWAS	437027	31630189	12079899
GWAS_EXTEND	ALBUMIN	GWAS	7159	NA	NA
GWAS_EXTEND	ALP	GWAS	7159	NA	NA
GWAS_EXTEND	ALT	GWAS	7159	NA	NA
GWAS_EXTEND	BFP	GWAS	7159	NA	NA
GWAS_EXTEND	BILIRUBIN	GWAS	7159	NA	NA
GWAS_EXTEND	BMI	GWAS	7159	NA	NA
GWAS_EXTEND	BUN	GWAS	7159	NA	NA
ExSeq_52kQT_EU	CHOL	ExSeq	12221	36280733	2056261
GWAS_EXTEND	CreatinineUrinary	GWAS	7159	NA	NA
GWAS_EXTEND	DBP	GWAS	7159	NA	NA
GWAS_EXTEND	eGFRcrea	GWAS	7159	NA	NA
GWAS_EXTEND	HBA1CMMOL	GWAS	7159	NA	NA
GWAS_EXTEND	HDL	GWAS	7159	NA	NA
GWAS_EXTEND	HDL_RATIO	GWAS	7159	NA	NA
GWAS_EXTEND	HEIGHT	GWAS	7159	NA	NA
GWAS_EXTEND	HIPC	GWAS	7159	NA	NA
GWAS_EXTEND	K	GWAS	7159	NA	NA
GWAS_EXTEND	LDL	GWAS	7159	NA	NA
GWAS_EXTEND	SBP	GWAS	7159	NA	NA
GWAS_EXTEND	Sodium	GWAS	7159	NA	NA
GWAS_EXTEND	TG	GWAS	7159	NA	NA
GWAS_EXTEND	UACR	GWAS	7159	NA	NA
GWAS_EXTEND	WAIST	GWAS	7159	NA	NA
GWAS_EXTEND	WEIGHT	GWAS	7159	NA	NA
GWAS_FinnGen_eu	AF	GWAS	96499	NA	16032123
GWAS_FinnGen_eu	CKD	GWAS	96499	NA	16059198
GWAS_FinnGen_eu	DiabeticNephro	GWAS	96499	NA	16058509
GWAS_FinnGen_eu	DiabeticRetino	GWAS	96499	NA	16057547
GWAS_FinnGen_eu	GA	GWAS	96499	NA	15995249
GWAS_FinnGen_eu	HF	GWAS	96499	NA	16056005
GWAS_FinnGen_eu	HYPERTENSION	GWAS	96499	NA	16057270
GWAS_FinnGen_eu	ND	GWAS	96499	NA	15995492
GWAS_FinnGen_eu	NeuropathyinT2D	GWAS	96499	NA	16055365
GWAS_FinnGen_eu	Obesity	GWAS	96499	NA	16059467
GWAS_FinnGen_eu	POAG	GWAS	96499	NA	16058885
GWAS_FinnGen_eu	Stroke_hemorrhagic	GWAS	96499	NA	16056847
GWAS_FinnGen_eu	Stroke_ischemic	GWAS	96499	NA	16058508
GWAS_FinnGen_eu	T1D	GWAS	96499	NA	16053817
GWAS_FinnGen_eu	T2D	GWAS	96499	NA	16059004
GWAS_FUSION_eu	BMI	GWAS	1683	NA	300348
GWAS_FUSION_eu	CreatinineUrinary	GWAS	1683	NA	300330
GWAS_FUSION_eu	DBP	GWAS	1683	NA	300348
GWAS_FUSION_eu	FG	GWAS	1683	NA	300345
GWAS_FUSION_eu	FGadjBMI	GWAS	1683	NA	300345
GWAS_FUSION_eu	FI	GWAS	1683	NA	300345
GWAS_FUSION_eu	FIadjBMI	GWAS	1683	NA	300344
GWAS_FUSION_eu	HDL	GWAS	1683	NA	300347
GWAS_FUSION_eu	LDL	GWAS	1683	NA	300347
GWAS_FUSION_eu	SBP	GWAS	1683	NA	300348
GWAS_FUSION_eu	T2D	GWAS	1683	NA	300352
GWAS_FUSION_eu	T2DadjBMI	GWAS	1683	NA	300346
GWAS_FUSIONonlyMetaboChip_eu	BMI	GWAS	2137	NA	132546
GWAS_FUSIONonlyMetaboChip_eu	DBP	GWAS	2137	NA	132544
GWAS_FUSIONonlyMetaboChip_eu	FG	GWAS	2137	NA	130135
GWAS_FUSIONonlyMetaboChip_eu	FGadjBMI	GWAS	2137	NA	130135
GWAS_FUSIONonlyMetaboChip_eu	FI	GWAS	2137	NA	131335
GWAS_FUSIONonlyMetaboChip_eu	FIadjBMI	GWAS	2137	NA	130023
GWAS_FUSIONonlyMetaboChip_eu	HDL	GWAS	2137	NA	131119
GWAS_FUSIONonlyMetaboChip_eu	LDL	GWAS	2137	NA	132013
GWAS_FUSIONonlyMetaboChip_eu	SBP	GWAS	2137	NA	132546
GWAS_FUSIONonlyMetaboChip_eu	T2D	GWAS	2137	NA	167370
GWAS_FUSIONonlyMetaboChip_eu	T2DadjBMI	GWAS	2137	NA	129505
GWAS_GEFOS	Fracture	GWAS	264973	30158200	2541018
GWAS_GEFOS-LeanBodyMass_eu	Ap-LM	GWAS	38292	28724990	2697639
GWAS_GEFOS-LeanBodyMass_eu	TB-LM	GWAS	38292	28724990	2651418
GWAS_GEFOS-LifeTotalBodyBMD_mixed	TB-BMD	GWAS	66628	29304378	16292170
GWAS_GEFOS-PediatricMSK_mixed	TB-LM	GWAS	10414	28743860	2276588
GWAS_GEFOS-PediatricMSK_mixed	TBLH-BMD	GWAS	10414	28743860	2276588
GWAS_GEFOS-UK10KBMD_eu	FNBMD	GWAS	32965	26367794	10586896
GWAS_GEFOS-UK10KBMD_eu	ForearmBMD	GWAS	32965	26367794	9955365
GWAS_GEFOS-UK10KBMD_eu	LSBMD	GWAS	32965	26367794	10582863
GWAS_GEFOS-UKBBeBMD_eu	eBMD	GWAS	142487	28869591	17166350
GWAS_GEFOS2	FNBMD	GWAS	32961	22504420	2480734
GWAS_GEFOS2	LSBMD	GWAS	32961	22504420	2479565
GWAS_GEFOS2_females	FNBMD	GWAS	24676	22504420	2518146
GWAS_GEFOS2_females	LSBMD	GWAS	24676	22504420	2477114
GWAS_GEFOS2_males	FNBMD	GWAS	10568	22504420	2437615
GWAS_GEFOS2_males	LSBMD	GWAS	10568	22504420	2464734
GWAS_GEI	AFxAGE	GWAS	88383	28900195	2231896
GWAS_GEI	AFxAGEo65	GWAS	88383	28900195	2254622
GWAS_GEI	AFxAGEy65	GWAS	88383	28900195	2240153
GWAS_GEI	AFxBMI	GWAS	88383	28900195	2363735
GWAS_GEI	AFxHTN	GWAS	88383	28900195	2363507
GWAS_GEI	AFxSEX	GWAS	88383	28900195	2364139
GWAS_GENESIS_eu	ISen	GWAS	2765	25798622	10956335
GWAS_GENESIS_eu	ISenBMI	GWAS	2765	25798622	10978386
GWAS_GERA_eu	AllergicRhinitis	GWAS	56637	33893285	15657364
GWAS_GERA_eu	ALLOA	GWAS	56637	33893285	15676722
GWAS_GERA_eu	AMD	GWAS	56637	33893285	15389744
GWAS_GERA_eu	AnyCVD	GWAS	56637	33893285	15625940
GWAS_GERA_eu	Asthma	GWAS	56637	33893285	15620650
GWAS_GERA_eu	Cancer	GWAS	56637	33893285	15624266
GWAS_GERA_eu	Dermatophytosis	GWAS	56637	33893285	15615887
GWAS_GERA_eu	Dyslipid	GWAS	56637	33893285	15691952
GWAS_GERA_eu	Hemorrhoids	GWAS	56637	33893285	15627428
GWAS_GERA_eu	HerniaAbdomin	GWAS	56637	33893285	15577689
GWAS_GERA_eu	HYPERTENSION	GWAS	56637	33893285	15663352
GWAS_GERA_eu	IBS	GWAS	56637	33893285	15461020
GWAS_GERA_eu	IronDef	GWAS	56637	33893285	15399163
GWAS_GERA_eu	MDD	GWAS	56637	33893285	15601846
GWAS_GERA_eu	Osteoporosis	GWAS	56637	33893285	15556966
GWAS_GERA_eu	PepticUlcers	GWAS	56637	33893285	15117549
GWAS_GERA_eu	Psychiatric	GWAS	56637	33893285	15634661
GWAS_GERA_eu	PVD	GWAS	56637	33893285	15480826
GWAS_GERA_eu	SleepInsomnia	GWAS	56637	33893285	NA
GWAS_GERA_eu	Stress	GWAS	56637	33893285	15530383
GWAS_GERA_eu	T2D	GWAS	56637	33893285	15546297
GWAS_GERA_eu	VaricoseVeins	GWAS	56637	33893285	15361363
GWAS_GERA_females_eu	AllergicRhinitis	GWAS	33921	33893285	445087
GWAS_GERA_females_eu	ALLOA	GWAS	33921	33893285	445282
GWAS_GERA_females_eu	AMD	GWAS	33921	33893285	435782
GWAS_GERA_females_eu	AnyCVD	GWAS	33921	33893285	441731
GWAS_GERA_females_eu	Asthma	GWAS	33921	33893285	443779
GWAS_GERA_females_eu	Cancer	GWAS	33921	33893285	443627
GWAS_GERA_females_eu	Dermatophytosis	GWAS	33921	33893285	442154
GWAS_GERA_females_eu	Dyslipid	GWAS	33921	33893285	445707
GWAS_GERA_females_eu	Hemorrhoids	GWAS	33921	33893285	443745
GWAS_GERA_females_eu	HerniaAbdomin	GWAS	33921	33893285	436709
GWAS_GERA_females_eu	HYPERTENSION	GWAS	33921	33893285	444717
GWAS_GERA_females_eu	IBS	GWAS	33921	33893285	439994
GWAS_GERA_females_eu	IronDef	GWAS	33921	33893285	435437
GWAS_GERA_females_eu	MDD	GWAS	33921	33893285	443153
GWAS_GERA_females_eu	Osteoporosis	GWAS	33921	33893285	442307
GWAS_GERA_females_eu	PepticUlcers	GWAS	33921	33893285	426160
GWAS_GERA_females_eu	Psychiatric	GWAS	33921	33893285	444623
GWAS_GERA_females_eu	PVD	GWAS	33921	33893285	436946
GWAS_GERA_females_eu	SleepInsomnia	GWAS	33921	33893285	NA
GWAS_GERA_females_eu	Stress	GWAS	33921	33893285	441945
GWAS_GERA_females_eu	T2D	GWAS	33921	33893285	440131
GWAS_GERA_females_eu	VaricoseVeins	GWAS	33921	33893285	437437
GWAS_GERA_males_eu	AllergicRhinitis	GWAS	22716	33893285	450590
GWAS_GERA_males_eu	ALLOA	GWAS	22716	33893285	451483
GWAS_GERA_males_eu	AMD	GWAS	22716	33893285	439288
GWAS_GERA_males_eu	AnyCVD	GWAS	22716	33893285	452778
GWAS_GERA_males_eu	Asthma	GWAS	22716	33893285	445991
GWAS_GERA_males_eu	Cancer	GWAS	22716	33893285	449802
GWAS_GERA_males_eu	Dermatophytosis	GWAS	22716	33893285	448779
GWAS_GERA_males_eu	Dyslipid	GWAS	22716	33893285	451888
GWAS_GERA_males_eu	Hemorrhoids	GWAS	22716	33893285	449873
GWAS_GERA_males_eu	HerniaAbdomin	GWAS	22716	33893285	447969
GWAS_GERA_males_eu	HYPERTENSION	GWAS	22716	33893285	453099
GWAS_GERA_males_eu	IBS	GWAS	22716	33893285	424914
GWAS_GERA_males_eu	IronDef	GWAS	22716	33893285	436836
GWAS_GERA_males_eu	MDD	GWAS	22716	33893285	444334
GWAS_GERA_males_eu	Osteoporosis	GWAS	22716	33893285	424937
GWAS_GERA_males_eu	PepticUlcers	GWAS	22716	33893285	417502
GWAS_GERA_males_eu	Psychiatric	GWAS	22716	33893285	445349
GWAS_GERA_males_eu	PVD	GWAS	22716	33893285	442110
GWAS_GERA_males_eu	SleepInsomnia	GWAS	22716	33893285	NA
GWAS_GERA_males_eu	Stress	GWAS	22716	33893285	440664
GWAS_GERA_males_eu	T2D	GWAS	22716	33893285	448335
GWAS_GERA_males_eu	VaricoseVeins	GWAS	22716	33893285	420585
GWAS_GERFHS	Stroke_hemorrhagic	GWAS	1201	NA	7324073
GWAS_GIANT	BMI	GWAS	253288	22982992	2558268
GWAS_GIANT	HEIGHT	GWAS	253288	22982992	2550457
GWAS_GIANT_eu	BMI	GWAS	133154	22982992	2418748
GWAS_GIANT_eu	HEIGHT	GWAS	133154	22982992	2418748
GWAS_GIANT-A	HIPC	GWAS	245749	25673412	2561887
GWAS_GIANT-A	HIPCadjBMI	GWAS	245749	25673412	2543034
GWAS_GIANT-A	WAIST	GWAS	245749	25673412	2566990
GWAS_GIANT-A	WAISTadjBMI	GWAS	245749	25673412	2547877
GWAS_GIANT-A	WHR	GWAS	245749	25673412	2562840
GWAS_GIANT-A	WHRadjBMI	GWAS	245749	25673412	2544509
GWAS_GIANT-A_eu	HIPC	GWAS	232101	25673412	2560264
GWAS_GIANT-A_eu	HIPCadjBMI	GWAS	232101	25673412	2541397
GWAS_GIANT-A_eu	WAIST	GWAS	232101	25673412	2565820
GWAS_GIANT-A_eu	WAISTadjBMI	GWAS	232101	25673412	2546456
GWAS_GIANT-A_eu	WHR	GWAS	232101	25673412	2561198
GWAS_GIANT-A_eu	WHRadjBMI	GWAS	232101	25673412	2542905
GWAS_GIANT-A_eu_females	HIPC	GWAS	74998	25673412	2469623
GWAS_GIANT-A_eu_females	HIPCadjBMI	GWAS	74998	25673412	2469622
GWAS_GIANT-A_eu_females	WAIST	GWAS	74998	25673412	2447154
GWAS_GIANT-A_eu_females	WAISTadjBMI	GWAS	74998	25673412	2475863
GWAS_GIANT-A_eu_females	WHR	GWAS	74998	25673412	2468907
GWAS_GIANT-A_eu_females	WHRadjBMI	GWAS	74998	25673412	2470594
GWAS_GIANT-A_eu_males	HIPC	GWAS	74823	25673442	2215947
GWAS_GIANT-A_eu_males	HIPCadjBMI	GWAS	74823	25673442	2190965
GWAS_GIANT-A_eu_males	WAIST	GWAS	74823	25673442	2304207
GWAS_GIANT-A_eu_males	WAISTadjBMI	GWAS	74823	25673442	2297166
GWAS_GIANT-A_eu_males	WHR	GWAS	74823	25673442	2209655
GWAS_GIANT-A_eu_males	WHRadjBMI	GWAS	74823	25673442	2148208
GWAS_GIANT-A_females	HIPC	GWAS	134594	25673412	2470187
GWAS_GIANT-A_females	HIPCadjBMI	GWAS	134594	25673412	2470218
GWAS_GIANT-A_females	WAIST	GWAS	134594	25673412	2448396
GWAS_GIANT-A_females	WAISTadjBMI	GWAS	134594	25673412	2477278
GWAS_GIANT-A_females	WHR	GWAS	134594	25673412	2469440
GWAS_GIANT-A_females	WHRadjBMI	GWAS	134594	25673412	2471184
GWAS_GIANT-A_males	HIPC	GWAS	110004	25673412	2217249
GWAS_GIANT-A_males	HIPCadjBMI	GWAS	110004	25673412	2191712
GWAS_GIANT-A_males	WAIST	GWAS	110004	25673412	2305388
GWAS_GIANT-A_males	WAISTadjBMI	GWAS	110004	25673412	2298983
GWAS_GIANT-A_males	WHR	GWAS	110004	25673412	2210935
GWAS_GIANT-A_males	WHRadjBMI	GWAS	110004	25673412	2149030
GWAS_GIANT-PA	BMI	GWAS	200452	28448500	3175867
GWAS_GIANT-PA	WAIST	GWAS	200452	28448500	3167278
GWAS_GIANT-PA	WHR	GWAS	200452	28448500	3065391
GWAS_GIANT-PA_active	BMI	GWAS	150206	28448500	3170798
GWAS_GIANT-PA_active	WAIST	GWAS	150206	28448500	3166057
GWAS_GIANT-PA_active	WHR	GWAS	150206	28448500	3042441
GWAS_GIANT-PA_active_eu	BMI	GWAS	138222	28448500	2695985
GWAS_GIANT-PA_active_eu	WAIST	GWAS	138222	28448500	2699780
GWAS_GIANT-PA_active_eu	WHR	GWAS	138222	28448500	2702098
GWAS_GIANT-PA_active_men	BMI	GWAS	62447	28448500	3164762
GWAS_GIANT-PA_active_men	WAIST	GWAS	62447	28448500	3149007
GWAS_GIANT-PA_active_men	WHR	GWAS	62447	28448500	3040791
GWAS_GIANT-PA_active_men_eu	BMI	GWAS	55518	28448500	2637491
GWAS_GIANT-PA_active_men_eu	WAIST	GWAS	55518	28448500	2639717
GWAS_GIANT-PA_active_men_eu	WHR	GWAS	55518	28448500	2639535
GWAS_GIANT-PA_active_women	BMI	GWAS	89147	28448500	3164695
GWAS_GIANT-PA_active_women	WAIST	GWAS	89147	28448500	3135815
GWAS_GIANT-PA_active_women	WHR	GWAS	89147	28448500	3020660
GWAS_GIANT-PA_active_women_eu	BMI	GWAS	80020	28448500	2692760
GWAS_GIANT-PA_active_women_eu	WAIST	GWAS	80020	28448500	2696918
GWAS_GIANT-PA_active_women_eu	WHR	GWAS	80020	28448500	2699259
GWAS_GIANT-PA_eu	BMI	GWAS	180431	28448500	2721867
GWAS_GIANT-PA_eu	WAIST	GWAS	180431	28448500	2725613
GWAS_GIANT-PA_eu	WHR	GWAS	180431	28448500	2723529
GWAS_GIANT-PA_inactive	BMI	GWAS	47269	28448500	3050798
GWAS_GIANT-PA_inactive	WAIST	GWAS	47269	28448500	3139732
GWAS_GIANT-PA_inactive	WHR	GWAS	47269	28448500	3043273
GWAS_GIANT-PA_inactive_eu	BMI	GWAS	42066	28448500	2647168
GWAS_GIANT-PA_inactive_eu	WAIST	GWAS	42066	28448500	2648751
GWAS_GIANT-PA_inactive_eu	WHR	GWAS	42066	28448500	2651999
GWAS_GIANT-PA_inactive_men	BMI	GWAS	22056	28448500	3056294
GWAS_GIANT-PA_inactive_men	WAIST	GWAS	22056	28448500	2583766
GWAS_GIANT-PA_inactive_men	WHR	GWAS	22056	28448500	3011614
GWAS_GIANT-PA_inactive_men_eu	BMI	GWAS	17107	28448500	2586277
GWAS_GIANT-PA_inactive_men_eu	WAIST	GWAS	17107	28448500	2583766
GWAS_GIANT-PA_inactive_men_eu	WHR	GWAS	17107	28448500	2582546
GWAS_GIANT-PA_inactive_women	BMI	GWAS	26836	28448500	3128396
GWAS_GIANT-PA_inactive_women	WAIST	GWAS	26836	28448500	3108339
GWAS_GIANT-PA_inactive_women	WHR	GWAS	26836	28448500	3015242
GWAS_GIANT-PA_inactive_women_eu	BMI	GWAS	23762	28448500	2643191
GWAS_GIANT-PA_inactive_women_eu	WAIST	GWAS	23762	28448500	2647304
GWAS_GIANT-PA_inactive_women_eu	WHR	GWAS	23762	28448500	2650336
GWAS_GIANT-PA_men	BMI	GWAS	84503	28448500	3172046
GWAS_GIANT-PA_men	WAIST	GWAS	84503	28448500	3157532
GWAS_GIANT-PA_men	WHR	GWAS	84503	28448500	3060920
GWAS_GIANT-PA_men_eu	BMI	GWAS	76038	28448500	2650596
GWAS_GIANT-PA_men_eu	WAIST	GWAS	76038	28448500	2648333
GWAS_GIANT-PA_men_eu	WHR	GWAS	76038	28448500	2647894
GWAS_GIANT-PA_women	BMI	GWAS	115949	28448500	3165533
GWAS_GIANT-PA_women	WAIST	GWAS	115949	28448500	3147425
GWAS_GIANT-PA_women	WHR	GWAS	115949	28448500	3044636
GWAS_GIANT-PA_women_eu	BMI	GWAS	104393	28448500	2718625
GWAS_GIANT-PA_women_eu	WAIST	GWAS	104393	28448500	2722559
GWAS_GIANT-PA_women_eu	WHR	GWAS	104393	28448500	2720481
GWAS_GiantUKBB_eu	BMI	GWAS	795640	30124842	2339437
GWAS_GiantUKBB_eu	HEIGHT	GWAS	795640	30124842	2337143
GWAS_GIANTxSMK	BMIadjSMK	GWAS	241258	28443625	2460892
GWAS_GIANTxSMK	WCadjBMISMK	GWAS	241258	28443625	2448340
GWAS_GIANTxSMK	WHRadjBMISMK	GWAS	241258	28443625	2443527
GWAS_GIANTxSMK_eu	BMIadjSMK	GWAS	209894	28443625	2458878
GWAS_GIANTxSMK_eu	WCadjBMISMK	GWAS	209894	28443625	2452067
GWAS_GIANTxSMK_eu	WHRadjBMISMK	GWAS	209894	28443625	2448849
GWAS_GIANTxSMK_eu_men	BMIadjSMK	GWAS	87109	28443625	2434346
GWAS_GIANTxSMK_eu_men	WCadjBMISMK	GWAS	87109	28443625	2423292
GWAS_GIANTxSMK_eu_men	WHRadjBMISMK	GWAS	87109	28443625	2411750
GWAS_GIANTxSMK_eu_women	BMIadjSMK	GWAS	122785	28443625	2471031
GWAS_GIANTxSMK_eu_women	WCadjBMISMK	GWAS	122785	28443625	2466660
GWAS_GIANTxSMK_eu_women	WHRadjBMISMK	GWAS	122785	28443625	2459647
GWAS_GIANTxSMK_men	BMIadjSMK	GWAS	100789	28443625	2445100
GWAS_GIANTxSMK_men	WCadjBMISMK	GWAS	100789	28443625	2432107
GWAS_GIANTxSMK_men	WHRadjBMISMK	GWAS	100789	28443625	2422958
GWAS_GIANTxSMK_women	BMIadjSMK	GWAS	140469	28443625	2466301
GWAS_GIANTxSMK_women	WCadjBMISMK	GWAS	140469	28443625	2449665
GWAS_GIANTxSMK_women	WHRadjBMISMK	GWAS	140469	28443625	2430740
GWAS_GISCOME_eu	mRS012v3456	GWAS	6165	30796134	8464871
GWAS_GISCOME_eu	mRS012v3456AdjSever	GWAS	6165	30796134	8465075
GWAS_GISCOME_eu	mRS01v23456	GWAS	6165	30796134	11830938
GWAS_GISCOME_eu	mRS01v23456AdjSever	GWAS	6165	30796134	11790868
GWAS_GISCOME_eu	mRSOrdinal	GWAS	6165	30796134	8508047
GWAS_GISCOME_eu	mRSOrdinalAdjSever	GWAS	6165	30796134	8499550
GWAS_GODARTS_AFFYMETRIX	Adiponectin	GWAS	2917	NA	15670548
GWAS_GODARTS_AFFYMETRIX	BMI	GWAS	2917	NA	20321760
ExSeq_FinnMetSeq_eu	CHOL	ExSeq	19291	31367044	638126
GWAS_GODARTS_AFFYMETRIX	CreatinineUrinary	GWAS	2917	NA	20330865
GWAS_GODARTS_AFFYMETRIX	DBP	GWAS	2917	NA	20123917
GWAS_GODARTS_AFFYMETRIX	eGFRcrea	GWAS	2917	NA	20330865
GWAS_GODARTS_AFFYMETRIX	HBA1C	GWAS	2917	NA	20203756
GWAS_GODARTS_AFFYMETRIX	HDL	GWAS	2917	NA	20189684
GWAS_GODARTS_AFFYMETRIX	HEIGHT	GWAS	2917	NA	20326173
GWAS_GODARTS_AFFYMETRIX	LDL_CALCULATED	GWAS	2917	NA	19813288
GWAS_GODARTS_AFFYMETRIX	LEP	GWAS	2917	NA	14506510
GWAS_GODARTS_AFFYMETRIX	SBP	GWAS	2917	NA	20124408
GWAS_GODARTS_AFFYMETRIX	TG	GWAS	2917	NA	20183366
GWAS_GODARTS_AFFYMETRIX	WAIST	GWAS	2917	NA	19966611
GWAS_GODARTS_AFFYMETRIX	WEIGHT	GWAS	2917	NA	20321760
GWAS_GODARTS_BROAD	Adiponectin	GWAS	1884	NA	16401786
GWAS_GODARTS_BROAD	BMI	GWAS	1884	NA	16973563
GWAS_GS-SFHS-2789-3393_eu	CHOL	GWAS	20032	28270201	24102057
GWAS_GODARTS_BROAD	CreatinineUrinary	GWAS	1884	NA	16973616
GWAS_GODARTS_BROAD	DBP	GWAS	1884	NA	16973616
GWAS_GODARTS_BROAD	eGFRcrea	GWAS	1884	NA	16973616
GWAS_GODARTS_BROAD	HBA1C	GWAS	1884	NA	16973510
GWAS_GODARTS_BROAD	HDL	GWAS	1884	NA	16973510
GWAS_GODARTS_BROAD	HEIGHT	GWAS	1884	NA	16973616
GWAS_GODARTS_BROAD	LDL	GWAS	1884	NA	16971961
GWAS_GODARTS_BROAD	LEP	GWAS	1884	NA	16320687
GWAS_GODARTS_BROAD	T2D	GWAS	1884	NA	16927024
GWAS_GODARTS_BROAD	TG	GWAS	1884	NA	16973510
GWAS_GODARTS_BROAD	WAIST	GWAS	1884	NA	16973332
GWAS_GODARTS_BROAD	WEIGHT	GWAS	1884	NA	16973332
GWAS_GODARTS_ILLUMINA	Adiponectin	GWAS	2902	NA	15953467
GWAS_GODARTS_ILLUMINA	BMI	GWAS	2902	NA	19918280
Hindy2022_lipids_EU	CHOL	ExSeq	97493	34932938	4400665
GWAS_GODARTS_ILLUMINA	CreatinineUrinary	GWAS	2902	NA	19927424
GWAS_GODARTS_ILLUMINA	DBP	GWAS	2902	NA	19899456
GWAS_GODARTS_ILLUMINA	eGFRcrea	GWAS	2902	NA	19927424
GWAS_GODARTS_ILLUMINA	HBA1C	GWAS	2902	NA	19749772
GWAS_GODARTS_ILLUMINA	HDL	GWAS	2902	NA	19746315
GWAS_GODARTS_ILLUMINA	HEIGHT	GWAS	2902	NA	19922923
GWAS_GODARTS_ILLUMINA	LDL	GWAS	2902	NA	19718988
GWAS_GODARTS_ILLUMINA	SBP	GWAS	2902	NA	19899456
GWAS_GODARTS_ILLUMINA	TG	GWAS	2902	NA	19731321
GWAS_GODARTS_ILLUMINA	WAIST	GWAS	2902	NA	19915986
GWAS_GODARTS_ILLUMINA	WEIGHT	GWAS	2902	NA	19918280
GWAS_GODARTS_METABO	Adiponectin	GWAS	7119	NA	125106
GWAS_GODARTS_METABO	BMI	GWAS	7119	NA	125548
Willer2013_GLGC_lipids_eu	CHOL	GWAS	188577	24097068	2446945
GWAS_GODARTS_METABO	CreatinineUrinary	GWAS	7119	NA	125548
GWAS_GODARTS_METABO	DBP	GWAS	7119	NA	125548
GWAS_GODARTS_METABO	eGFRcrea	GWAS	7119	NA	125548
GWAS_GODARTS_METABO	FI	GWAS	7119	NA	125548
GWAS_GODARTS_METABO	HBA1C	GWAS	7119	NA	125548
GWAS_GODARTS_METABO	HDL	GWAS	7119	NA	251096
GWAS_GODARTS_METABO	HEIGHT	GWAS	7119	NA	125548
GWAS_GODARTS_METABO	LDL	GWAS	7119	NA	125548
GWAS_GODARTS_METABO	LEP	GWAS	7119	NA	124722
GWAS_GODARTS_METABO	SBP	GWAS	7119	NA	125548
GWAS_GODARTS_METABO	T2D	GWAS	7119	NA	125548
GWAS_GODARTS_METABO	TG	GWAS	7119	NA	125548
GWAS_GODARTS_METABO	WAIST	GWAS	7119	NA	125548
GWAS_GODARTS_METABO	WEIGHT	GWAS	7119	NA	125548
GWAS_GS-SFHS-2789-3393_eu	BFP	GWAS	20032	28270201	24103623
GWAS_GS-SFHS-2789-3393_eu	BMI	GWAS	20032	28270201	24106453
Jurgens2022_Quantitative_EU	CHOL	GWAS	459135	NA	18775436
GWAS_GS-SFHS-2789-3393_eu	Creatinine	GWAS	20032	28270201	24075513
GWAS_GS-SFHS-2789-3393_eu	DBP	GWAS	20032	28270201	24104798
GWAS_GS-SFHS-2789-3393_eu	EtOH	GWAS	20032	28270201	24093009
GWAS_GS-SFHS-2789-3393_eu	FG	GWAS	20032	28270201	24061395
GWAS_GS-SFHS-2789-3393_eu	FG_plus_diab	GWAS	20032	28270201	24072392
GWAS_GS-SFHS-2789-3393_eu	HDL	GWAS	20032	28270201	24102085
GWAS_GS-SFHS-2789-3393_eu	HEIGHT	GWAS	20032	28270201	24106724
GWAS_GS-SFHS-2789-3393_eu	HR	GWAS	20032	28270201	24106287
GWAS_GS-SFHS-2789-3393_eu	PulsePress	GWAS	20032	28270201	24104689
GWAS_GS-SFHS-2789-3393_eu	SBP	GWAS	20032	28270201	24104834
GWAS_GS-SFHS-2789-3393_eu	SerumUrea	GWAS	20032	28270201	24102338
GWAS_GS-SFHS-2789-3393_eu	Urate	GWAS	20032	28270201	21952053
GWAS_GS-SFHS-2789-3393_eu	WHR	GWAS	20032	28270201	24105784
GWAS_GS-SFHS-2802_eu	Urate	GWAS	3162	28270201	595061
GWAS_GUGC_eu	Urate	GWAS	110347	23263486	2451464
GWAS_HERMES_eu	HF	GWAS	972032	31919418	7824608
GWAS_HOORN_2018_DCS	ALBUMIN	GWAS	3414	NA	17213317
GWAS_HOORN_2018_DCS	BMI	GWAS	3414	NA	17664097
Graham_2021_lipids_EU	CHOL	GWAS	1320016	34887591	46492366
GWAS_HOORN_2018_DCS	Creatinine	GWAS	3414	NA	17663929
GWAS_HOORN_2018_DCS	CreatinineUrinary	GWAS	3414	NA	17663504
GWAS_HOORN_2018_DCS	DBP	GWAS	3414	NA	17663862
GWAS_HOORN_2018_DCS	eGFRcrea	GWAS	3414	NA	17214116
GWAS_HOORN_2018_DCS	FG	GWAS	3414	NA	17663997
GWAS_HOORN_2018_DCS	HBA1C	GWAS	3414	NA	17664015
GWAS_HOORN_2018_DCS	HDL	GWAS	3414	NA	17663985
GWAS_HOORN_2018_DCS	HR	GWAS	3414	NA	17192002
GWAS_HOORN_2018_DCS	LDL	GWAS	3414	NA	17662643
GWAS_HOORN_2018_DCS	SBP	GWAS	3414	NA	17663862
GWAS_HOORN_2018_DCS	TG	GWAS	3414	NA	17664033
GWAS_HOORN_2018_DCS	UACR	GWAS	3414	NA	17213317
GWAS_HOORN_2019_DCS	ALBUMIN	GWAS	1997	NA	16323956
GWAS_HOORN_2019_DCS	BMI	GWAS	1997	NA	16063286
Thareja2021_WGS_Qatar_sa	CHOL	WGS	6218	33623009	8155707
GWAS_HOORN_2019_DCS	Creatinine	GWAS	1997	NA	16062362
GWAS_HOORN_2019_DCS	CreatinineUrinary	GWAS	1997	NA	16061185
GWAS_HOORN_2019_DCS	DBP	GWAS	1997	NA	16062911
GWAS_HOORN_2019_DCS	eGFRcrea	GWAS	1997	NA	16061492
GWAS_HOORN_2019_DCS	FG	GWAS	1997	NA	16325071
GWAS_HOORN_2019_DCS	HBA1C	GWAS	1997	NA	16324974
GWAS_HOORN_2019_DCS	HBA1CMMOL	GWAS	1997	NA	NA
GWAS_HOORN_2019_DCS	HDL	GWAS	1997	NA	16062312
GWAS_HOORN_2019_DCS	HEIGHT	GWAS	1997	NA	16063406
GWAS_HOORN_2019_DCS	HR	GWAS	1997	NA	16301610
GWAS_HOORN_2019_DCS	LDL	GWAS	1997	NA	16060959
GWAS_HOORN_2019_DCS	SBP	GWAS	1997	NA	16325621
GWAS_HOORN_2019_DCS	TG	GWAS	1997	NA	16325104
GWAS_HOORN_2019_DCS	UACR	GWAS	1997	NA	16322754
GWAS_HOORN_2019_DCS	WEIGHT	GWAS	1997	NA	16063286
GWAS_HPTxNCGM	toastLAA	GWAS	2175	NA	559489
GWAS_HPTxNCGM	toastSAO	GWAS	2175	NA	550357
GWAS_HRgene	HR	GWAS	181171	23583979	2498726
GWAS_IA-BakkerMK2020_ea	IA	GWAS	238207	33199917	5897108
GWAS_IA-BakkerMK2020_eu	IA	GWAS	79429	33199917	4484251
GWAS_IA-BakkerMK2020_eu	IAU	GWAS	79429	33199917	4445233
GWAS_IA-BakkerMK2020_eu	SAH	GWAS	79429	33199917	4480722
GWAS_IA-BakkerMK2020_mixed	IA	GWAS	317636	33199917	3535976
GWAS_IAMDGC_eu	AMD	GWAS	33976	29529059	12044155
GWAS_IAMDGC_eu_men	AMD	GWAS	14352	29529059	12143715
GWAS_IAMDGC_eu_old	AMD	GWAS	16587	29529059	12232308
GWAS_IAMDGC_eu_women	AMD	GWAS	19624	29529059	12143715
GWAS_IAMDGC_eu_young	AMD	GWAS	17031	29529059	12232308
GWAS_IBDGenetics_eu	CD	IChip	86640	26192919	NA
GWAS_IBDGenetics_eu	IBD	IChip	86640	26192919	NA
GWAS_IBDGenetics_eu	UC	IChip	86640	26192919	NA
GWAS_IPF_eu	IPF	GWAS	11259	31710517	10803299
GWAS_ISGC_eu	WMH	GWAS	11226	30659137	7610223
GWAS_IVGTT	AIR	GWAS	5567	28490609	9368931
GWAS_IVGTT	AIRadjBMInSI	GWAS	5567	28490609	9353050
GWAS_IVGTT	AIRadjSI	GWAS	5567	28490609	9353049
GWAS_IVGTT	DI	GWAS	5567	28490609	9358592
GWAS_IVGTT	DIadjBMI	GWAS	5567	28490609	9358593
GWAS_IVGTT	ISR	GWAS	5567	28490609	6883512
GWAS_IVGTT	ISRadjBMI	GWAS	5567	28490609	6883438
GWAS_IVGTT	PEAK	GWAS	5567	28490609	9396976
GWAS_IVGTT	PEAKadjBMInSI	GWAS	5567	28490609	9321573
GWAS_IVGTT	PEAKadjSI	GWAS	5567	28490609	9360227
GWAS_Leptin_eu	LEP	GWAS	32161	26833098	2474947
GWAS_Leptin_eu	LEPadjBMI	GWAS	32161	26833098	2474801
GWAS_LOLIPOP	ALP	GWAS	61089	22001757	2639096
GWAS_LOLIPOP	ALT	GWAS	61089	22001757	2654294
GWAS_LOLIPOP	AST	GWAS	61089	22001757	2645605
GWAS_LOLIPOP	GGT	GWAS	61089	22001757	2654399
GWAS_MAGIC-2hrGlucose_eu	2hrG	GWAS	15234	20081857	2401308
GWAS_MAGIC-A1C_aa	HBA1C	GWAS	7564	28898252	3011136
GWAS_MAGIC-A1C_ea	HBA1C	GWAS	20838	28898252	2234936
GWAS_MAGIC-A1C_eu	HBA1C	GWAS	123665	28898252	2589418
GWAS_MAGIC-A1C_sa	HBA1C	GWAS	8874	28898252	1071327
GWAS_MAGIC-FastingProInsulin_eu	PI	GWAS	10701	21873528	2495572
GWAS_MAGIC-FGFI2010_eu	FG	GWAS	46186	20081858	2470048
GWAS_MAGIC-FGFI2010_eu	FI	GWAS	46186	20081858	2460677
GWAS_MAGIC-FGFI2010_eu	HOMAB	GWAS	46186	20081858	2456523
GWAS_MAGIC-FGFI2010_eu	HOMAIR	GWAS	46186	20081858	2457649
GWAS_MAGIC-FGFI2012_eu	FG	GWAS	58074	22581228	2628236
GWAS_MAGIC-FGFI2012_eu	FGadjBMI	GWAS	58074	22581228	2628236
GWAS_MAGIC-FGFI2012_eu	FI	GWAS	58074	22581228	2627208
GWAS_MAGIC-FGFI2012_eu	FIadjBMI	GWAS	58074	22581228	2627208
GWAS_MAGIC-HbA1c_eu	HBA1C	GWAS	46368	20858683	2571089
GWAS_MAGIC-InsulinSecretionOGTT_eu	AUCins	GWAS	5318	24699409	2433129
GWAS_MAGIC-InsulinSecretionOGTT_eu	AUCinsAUCgluc	GWAS	5318	24699409	2433274
GWAS_MAGIC-InsulinSecretionOGTT_eu	CIR	GWAS	5318	24699409	2424375
GWAS_MAGIC-InsulinSecretionOGTT_eu	CIRadjISI	GWAS	5318	24699409	2424047
GWAS_MAGIC-InsulinSecretionOGTT_eu	DI	GWAS	5318	24699409	2425235
GWAS_MAGIC-InsulinSecretionOGTT_eu	Incr30	GWAS	5318	24699409	2426443
GWAS_MAGIC-InsulinSecretionOGTT_eu	Ins30	GWAS	5318	24699409	2426440
GWAS_MAGIC-InsulinSecretionOGTT_eu	Ins30adjBMI	GWAS	5318	24699409	2431268
GWAS_MAGIC-InsulinSecretionOGTT_eu	ISI	GWAS	5318	24699409	2417147
GWAS_MAGIC-ISI_eu	ISIadjAgeSex	GWAS	16753	27416945	2403236
GWAS_MAGIC-ISI_eu	ISIadjAgeSexBMI	GWAS	16753	27416945	2403222
GWAS_MAGIC-ISI_eu	ISIadjBMIinterGenoBMI	GWAS	16753	27416945	2403026
GWAS_MAGIC-Metabochip_eu	2hrG	GWAS	133010	22885924	64054
GWAS_MAGIC-Metabochip_eu	FG	GWAS	133010	22885924	64566
GWAS_MAGIC-Metabochip_eu	FI	GWAS	133010	22885924	64507
GWAS_MAGICwFGo_eu	FGovertime	GWAS	13807	31263163	2494782
GWAS_MEDIA_aa	T2D	GWAS	23827	25102180	2579774
GWAS_MEGASTROKE	Stroke	GWAS	521612	29531354	7681843
GWAS_MEGASTROKE	Stroke_ischemic	GWAS	521612	29531354	7584872
GWAS_MEGASTROKE	toastCE	GWAS	521612	29531354	7993320
GWAS_MEGASTROKE	toastLAA	GWAS	521612	29531354	8029623
GWAS_MEGASTROKE	toastSAO	GWAS	521612	29531354	6180897
GWAS_MEGASTROKE_eu	Stroke	GWAS	446696	29531354	8258967
GWAS_MEGASTROKE_eu	Stroke_ischemic	GWAS	446696	29531354	8342170
GWAS_MEGASTROKE_eu	toastCE	GWAS	446696	29531354	8307995
GWAS_MEGASTROKE_eu	toastLAA	GWAS	446696	29531354	8452946
GWAS_MEGASTROKE_eu	toastSAO	GWAS	446696	29531354	8316380
GWAS_METSIM_eu	BMI	GWAS	8493	NA	697809
GWAS_METSIM_eu	Creatinine	GWAS	8493	NA	698167
GWAS_METSIM_eu	DBP	GWAS	8493	NA	697802
GWAS_METSIM_eu	eGFRcrea	GWAS	8493	NA	697815
GWAS_METSIM_eu	FG	GWAS	8493	NA	695448
GWAS_METSIM_eu	FGadjBMI	GWAS	8493	NA	691441
GWAS_METSIM_eu	FI	GWAS	8493	NA	691435
GWAS_METSIM_eu	FIadjBMI	GWAS	8493	NA	695445
GWAS_METSIM_eu	HBA1C	GWAS	8493	NA	695098
GWAS_METSIM_eu	HBA1CadjBMI	GWAS	8493	NA	691449
GWAS_METSIM_eu	HDL	GWAS	8493	NA	689073
GWAS_METSIM_eu	LDL	GWAS	8493	NA	688715
GWAS_METSIM_eu	SBP	GWAS	8493	NA	698166
GWAS_METSIM_eu	T2D	GWAS	8493	NA	674336
GWAS_METSIM_eu	T2DadjBMI	GWAS	8493	NA	674466
GWAS_MTAGICH_eu	allSVS	GWAS	239313	31430377	7143706
GWAS_MTAGICH_eu	lobarSVS	GWAS	239313	31430377	7503837
GWAS_MTAGICH_eu	nonlobarSVS	GWAS	239313	31430377	7143812
GWAS_OSA	AHI	GWAS	19733	29077507	11632926
GWAS_OSA	AHIinNREM	GWAS	19733	29077507	10524208
GWAS_OSA	AHIinREM	GWAS	19733	29077507	10583112
GWAS_OSA_eu	AHI	GWAS	5727	29077507	8824310
GWAS_OSA_eu	AHIinNREM	GWAS	5727	29077507	8703318
GWAS_OSA_eu	AHIinREM	GWAS	5727	29077507	8703154
GWAS_OSA_eu_females	AHI	GWAS	1825	29077507	7812274
GWAS_OSA_eu_females	AHIinNREM	GWAS	1825	29077507	6706969
GWAS_OSA_eu_females	AHIinREM	GWAS	1825	29077507	6705804
GWAS_OSA_eu_males	AHI	GWAS	3902	29077507	8431581
GWAS_OSA_eu_males	AHIinNREM	GWAS	3902	29077507	8426997
GWAS_OSA_eu_males	AHIinREM	GWAS	3902	29077507	8425604
GWAS_OSA_females	AHI	GWAS	10110	29077507	10948446
GWAS_OSA_females	AHIinNREM	GWAS	10110	29077507	7793474
GWAS_OSA_females	AHIinREM	GWAS	10110	29077507	7787374
GWAS_OSA_males	AHI	GWAS	9623	29077507	10802746
GWAS_OSA_males	AHIinNREM	GWAS	9623	29077507	7971721
GWAS_OSA_males	AHIinREM	GWAS	9623	29077507	7967783
GWAS_Osteoarthritis_eu	ALLOA	GWAS	455221	30664745	32415027
GWAS_Osteoarthritis_eu	HIPKNEEOA	GWAS	455221	30664745	31504877
GWAS_Osteoarthritis_eu	HIPOA	GWAS	455221	30664745	30984571
GWAS_Osteoarthritis_eu	KNEEOA	GWAS	455221	30664745	31224724
GWAS_OXBB	Adiponectin	GWAS	7193	NA	125355
GWAS_OXBB	BMI	GWAS	7193	NA	126413
ExSeq_52kQT_HS	CHOL	ExSeq	13617	36280733	2301613
GWAS_OXBB	DBP	GWAS	7193	NA	126172
GWAS_OXBB	FG	GWAS	7193	NA	126402
GWAS_OXBB	FI	GWAS	7193	NA	124102
GWAS_OXBB	HDL	GWAS	7193	NA	126189
GWAS_OXBB	HEIGHT	GWAS	7193	NA	126413
GWAS_OXBB	HYPERTENSION	GWAS	7193	NA	126172
GWAS_OXBB	LDL	GWAS	7193	NA	126054
GWAS_OXBB	PulsePress	GWAS	7193	NA	126172
GWAS_OXBB	SBP	GWAS	7193	NA	126172
GWAS_OXBB	TG	GWAS	7193	NA	126193
GWAS_OXBB	WHR	GWAS	7193	NA	126366
GWAS_PACG	PACG	GWAS	26454	27064256	4563732
GWAS_PGC	BIP	GWAS	16731	22472876	2415197
GWAS_PGC	MDD	GWAS	16731	22472876	1230509
GWAS_PGC	SCZ	GWAS	16731	22472876	1245746
GWAS_PredCausGen_eu	BS	GWAS	380228	35147782	10558707
GWAS_PredCausGen_eu	Ca	GWAS	380228	35147782	10558852
GWAS_PredCausGen_eu	DirectBilirubin	GWAS	380228	35147782	10558823
GWAS_PredCausGen_eu	LDL	GWAS	380228	35147782	10235493
GWAS_PredCausGen_eu	TG	GWAS	380228	35147782	10235609
GWAS_PRw1000GP	PRI	GWAS	293051	32439900	10140101
GWAS_PRw1000GP_eu	PRI	GWAS	271570	32439900	10258191
GWAS_SCOOPaSTILTS_eu	SCOOPvSTILTS	GWAS	9387	30677029	11193826
GWAS_SCOOPaSTILTS_eu	SCOOPvUKHLS	GWAS	9387	30677029	11191117
GWAS_SCOOPaSTILTS_eu	STILTSvUKHLS	GWAS	9387	30677029	11184952
GWAS_SIGMA1	T2D	GWAS	8891	24390345	8368722
GWAS_SmokingT2D_aa	SmokingFGint	GWAS	4824	32379818	42298
GWAS_SmokingT2D_aa	SmokingFGjoint	GWAS	4824	32379818	42298
GWAS_SmokingT2D_aa	SmokingFGmain	GWAS	4824	32379818	42298
GWAS_SmokingT2D_aa	SmokingT2Dint	GWAS	4824	32379818	41806
GWAS_SmokingT2D_aa	SmokingT2Djoint	GWAS	4824	32379818	41806
GWAS_SmokingT2D_aa	SmokingT2Dmain	GWAS	4824	32379818	41806
GWAS_SmokingT2D_eu	SmokingFGint	GWAS	18365	32379818	35202
GWAS_SmokingT2D_eu	SmokingFGjoint	GWAS	18365	32379818	35202
GWAS_SmokingT2D_eu	SmokingFGmain	GWAS	18365	32379818	35202
GWAS_SmokingT2D_eu	SmokingT2Dint	GWAS	18365	32379818	34966
GWAS_SmokingT2D_eu	SmokingT2Djoint	GWAS	18365	32379818	34966
GWAS_SmokingT2D_eu	SmokingT2Dmain	GWAS	18365	32379818	34966
GWAS_SmokingT2Des_aa	SmokingFGmain	GWAS	2430	32379818	42416
GWAS_SmokingT2Des_aa	SmokingT2Dmain	GWAS	2430	32379818	42017
GWAS_SmokingT2Des_eu	SmokingFGmain	GWAS	10639	32379818	35236
GWAS_SmokingT2Des_eu	SmokingT2Dmain	GWAS	10639	32379818	35052
GWAS_SmokingT2Dns_aa	SmokingFGmain	GWAS	2394	32379818	42397
GWAS_SmokingT2Dns_aa	SmokingT2Dmain	GWAS	2394	32379818	42034
GWAS_SmokingT2Dns_eu	SmokingFGmain	GWAS	7726	32379818	35307
GWAS_SmokingT2Dns_eu	SmokingT2Dmain	GWAS	7726	32379818	35070
GWAS_SpiroMeta_eu	FEV1	GWAS	400102	30804560	19839574
GWAS_SpiroMeta_eu	FEV1toFVC	GWAS	400102	30804560	19839659
GWAS_SpiroMeta_eu	FVC	GWAS	400102	30804560	19840771
GWAS_SpiroMeta_eu	PEF	GWAS	400102	30804560	14922549
GWAS_SpiroMeta_eu_Spiro	FEV1	GWAS	79055	30804560	19839574
GWAS_SpiroMeta_eu_Spiro	FEV1toFVC	GWAS	79055	30804560	19839659
GWAS_SpiroMeta_eu_Spiro	FVC	GWAS	79055	30804560	19840771
GWAS_SpiroMeta_eu_Spiro	PEF	GWAS	79055	30804560	14922549
GWAS_SpiroMeta_eu_UKBiobank	FEV1	GWAS	321047	30804560	19839574
GWAS_SpiroMeta_eu_UKBiobank	FEV1toFVC	GWAS	321047	30804560	19839659
GWAS_SpiroMeta_eu_UKBiobank	FVC	GWAS	321047	30804560	19840771
GWAS_SpiroMeta_eu_UKBiobank	PEF	GWAS	321047	30804560	14922549
GWAS_SpO2	SpO2avg	GWAS	22736	30990817	11364705
GWAS_SpO2	SpO2min	GWAS	22736	30990817	11340818
GWAS_SpO2	SpO2per90	GWAS	22736	30990817	11344341
GWAS_Stroke	Stroke_deep	GWAS	3076	24656865	5332611
GWAS_Stroke	Stroke_hemorrhagic	GWAS	3076	24656865	5355214
GWAS_Stroke	Stroke_lobar	GWAS	3076	24656865	5335461
GWAS_Stroke_europe	Stroke_deep	GWAS	967	24656865	6676112
GWAS_Stroke_europe	Stroke_hemorrhagic	GWAS	967	24656865	6676533
GWAS_Stroke_europe	Stroke_lobar	GWAS	967	24656865	6672120
GWAS_Stroke_gerfhs	Stroke_deep	GWAS	1336	24656863	6421784
GWAS_Stroke_gerfhs	Stroke_hemorrhagic	GWAS	1336	24656863	6419769
GWAS_Stroke_gerfhs	Stroke_lobar	GWAS	1336	24656863	6419931
GWAS_Stroke_gocha	Stroke_deep	GWAS	773	24656865	6687719
GWAS_Stroke_gocha	Stroke_hemorrhagic	GWAS	773	24656865	6691344
GWAS_Stroke_gocha	Stroke_lobar	GWAS	773	24656865	6691442
GWAS_SUMMITDKD-ESRDvControl_eu	ESRDvControl_DM	GWAS	5655	29703844	7839843
GWAS_SUMMITDKD-ESRDvControl_eu_T1D	ESRDvControl_T1D	GWAS	3208	29703844	6377623
GWAS_SUMMITDKD-ESRDvControl_eu_T2D	ESRDvControlinT2D	GWAS	2447	29703844	5802984
GWAS_SUMMITDKD-T1DT2D	allDKD	GWAS	40340	29703844	9164091
GWAS_SUMMITDKD-T1DT2D	CKD_DM	GWAS	40340	29703844	8785641
GWAS_SUMMITDKD-T1DT2D	CKDpDKD	GWAS	40340	29703844	8241905
GWAS_SUMMITDKD-T1DT2D	eGFRcrea_DM	GWAS	40340	29703844	9431756
GWAS_SUMMITDKD-T1DT2D	ESRDvNonESRD_DM	GWAS	40340	29703844	7895168
GWAS_SUMMITDKD-T1DT2D	lateDKD	GWAS	40340	29703844	8749593
GWAS_SUMMITDKD-T1DT2D	MA_DM	GWAS	40340	29703844	8860268
GWAS_SUMMITDKD-T1DT2D_eu	allDKD	GWAS	21231	29703844	9164091
GWAS_SUMMITDKD-T1DT2D_eu	CKD_DM	GWAS	21231	29703844	8785641
GWAS_SUMMITDKD-T1DT2D_eu	CKDpDKD	GWAS	21231	29703844	8241905
GWAS_SUMMITDKD-T1DT2D_eu	eGFRcrea_DM	GWAS	21231	29703844	9431756
GWAS_SUMMITDKD-T1DT2D_eu	ESRDvNonESRD_DM	GWAS	21231	29703844	7895168
GWAS_SUMMITDKD-T1DT2D_eu	lateDKD	GWAS	21231	29703844	8749593
GWAS_SUMMITDKD-T1DT2D_eu	MA_DM	GWAS	21231	29703844	8860268
GWAS_SUMMITDKD-T1DT2D_T1D_eu	CKD_T1D	GWAS	13515	29703844	7333028
GWAS_SUMMITDKD-T1DT2D_T1D_eu	CKDpDKD_T1D	GWAS	13515	29703844	7681670
GWAS_SUMMITDKD-T1DT2D_T1D_eu	eGFRcrea_T1D	GWAS	13515	29703844	9075441
GWAS_SUMMITDKD-T1DT2D_T1D_eu	ESRDvNonESRD_T1D	GWAS	13515	29703844	6383050
GWAS_SUMMITDKD-T1DT2D_T1D_eu	lateDKD_T1D	GWAS	13515	29703844	7807249
GWAS_SUMMITDKD-T1DT2D_T1D_eu	MA_T1D	GWAS	13515	29703844	7953872
GWAS_SUMMITDKD-T1DT2D_T2D	allDKD_T2D	GWAS	26827	29703844	9223517
GWAS_SUMMITDKD-T1DT2D_T2D	CKD_T2D	GWAS	26827	29703844	9134303
GWAS_SUMMITDKD-T1DT2D_T2D	CKDpDKDinT2D	GWAS	26827	29703844	7160123
GWAS_SUMMITDKD-T1DT2D_T2D	eGFRcrea_T2D	GWAS	26827	29703844	9230254
GWAS_SUMMITDKD-T1DT2D_T2D	ESRDvNonESRDinT2D	GWAS	26827	29703844	5844462
GWAS_SUMMITDKD-T1DT2D_T2D	lateDKD_T2D	GWAS	26827	29703844	7841086
GWAS_SUMMITDKD-T1DT2D_T2D	MA_T2D	GWAS	26827	29703844	9095788
GWAS_SUMMITDKD-T1DT2D_T2D_eu	allDKD_T2D	GWAS	9716	29703844	9223517
GWAS_SUMMITDKD-T1DT2D_T2D_eu	CKD_T2D	GWAS	9716	29703844	9134303
GWAS_SUMMITDKD-T1DT2D_T2D_eu	CKDpDKDinT2D	GWAS	9716	29703844	7160123
GWAS_SUMMITDKD-T1DT2D_T2D_eu	eGFRcrea_T2D	GWAS	9716	29703844	9230254
GWAS_SUMMITDKD-T1DT2D_T2D_eu	ESRDvNonESRDinT2D	GWAS	9716	29703844	5844462
GWAS_SUMMITDKD-T1DT2D_T2D_eu	lateDKD_T2D	GWAS	9716	29703844	7841086
GWAS_SUMMITDKD-T1DT2D_T2D_eu	MA_T2D	GWAS	9716	29703844	9095788
GWAS_T1DGC_IChipMETA2015	T1D	IChip	18892	25751624	117576
GWAS_T2DinA_aa	T2D	GWAS	4347	31049640	12160176
GWAS_UKBB_eu	SleepChronotype	GWAS	453379	30846698	14679612
GWAS_UKBB_eu	SleepDuration	GWAS	453379	30846698	14679612
GWAS_UKBB_eu	SleepEDS	GWAS	453379	30846698	14679612
GWAS_UKBB_eu	SleepInsomnia	GWAS	453379	30846698	14679612
GWAS_UKBB_eu	SleepLong	GWAS	453379	30846698	14679612
GWAS_UKBB_eu	SleepNaps	GWAS	453379	30846698	14679612
GWAS_UKBB_eu	SleepShort	GWAS	453379	30846698	14679612
GWAS_UKBiobank409k_eu	DBP	GWAS	408963	30297966	11919982
GWAS_UKBiobank409k_eu	RedCount	GWAS	408963	30297966	11919702
GWAS_UKBiobank409k_eu	SBP	GWAS	408963	30297966	11919982
GWAS_UKBiobank409k_eu	Thyroid	GWAS	408963	30297966	11919705
GWAS_UKBiobankACR_eu	UACR	GWAS	382500	30220432	11724314
GWAS_UKBiobankAD_eu	AD	GWAS	455258	30617256	12275745
GWAS_UKBiobankCARDIoGRAM	CAD	GWAS	336924	28714975	9040855
GWAS_UKBiobankCARDIoGRAM_CARDIoGRAM	CAD	GWAS	184305	26343387	8629779
GWAS_UKBiobankCircRhythm_eu	RA	GWAS	77440	30120083	8924484
GWAS_UKBiobankCircRhythm_eu	RAQT	GWAS	77440	30120083	9051283
GWAS_UKBiobankCircRhythm_eu_men	RA	GWAS	36654	30120083	8936849
GWAS_UKBiobankCircRhythm_eu_men	RAQT	GWAS	36654	30120083	9203586
GWAS_UKBiobankCircRhythm_eu_women	RA	GWAS	46592	30120083	8933211
GWAS_UKBiobankCircRhythm_eu_women	RAQT	GWAS	46592	30120083	9342161
GWAS_UKBiobankDietary_eu	freshfruit	GWAS	449210	32193382	11028564
GWAS_UKBiobankDietary_eu	oilyfish	GWAS	449210	32193382	11028574
GWAS_UKBiobankDietary_eu	PC1diet	GWAS	449210	32193382	11028494
GWAS_UKBiobankDietary_eu	PC3diet	GWAS	449210	32193382	11028494
GWAS_UKBiobankDietary_eu	saltconsumption	GWAS	449210	32193382	11028478
GWAS_UKBiobankFatDist_eu	AFR	GWAS	116138	30664634	25487057
GWAS_UKBiobankFatDist_eu	LFR	GWAS	116138	30664634	25487060
GWAS_UKBiobankFatDist_eu	TFR	GWAS	116138	30664634	25487053
GWAS_UKBiobankFatDist_eu_females	AFR	GWAS	61132	30664634	25462163
GWAS_UKBiobankFatDist_eu_females	LFR	GWAS	61132	30664634	25462202
GWAS_UKBiobankFatDist_eu_females	TFR	GWAS	61132	30664634	25462158
GWAS_UKBiobankFatDist_eu_males	AFR	GWAS	55006	30664634	25453202
GWAS_UKBiobankFatDist_eu_males	LFR	GWAS	55006	30664634	25453225
GWAS_UKBiobankFatDist_eu_males	TFR	GWAS	55006	30664634	25453194
GWAS_UKBiobankGEFOS_eu	eBMD	GWAS	426824	30598549	13770153
GWAS_UKBiobankGEFOS_eu	Fracture	GWAS	426824	30598549	13988015
GWAS_UKBiobankGIANT_eu	BMI	GWAS	694649	30239722	27413279
GWAS_UKBiobankGIANT_eu	WHR	GWAS	694649	30239722	27409150
GWAS_UKBiobankGIANT_eu	WHRadjBMI	GWAS	694649	30239722	27408618
GWAS_UKBiobankGIANT_females_eu	BMI	GWAS	379501	30239722	27413279
GWAS_UKBiobankGIANT_females_eu	WHR	GWAS	379501	30239722	27409150
GWAS_UKBiobankGIANT_females_eu	WHRadjBMI	GWAS	379501	30239722	27408618
GWAS_UKBiobankGIANT_males_eu	BMI	GWAS	315284	30239722	27413279
GWAS_UKBiobankGIANT_males_eu	WHR	GWAS	315284	30239722	27409150
GWAS_UKBiobankGIANT_males_eu	WHRadjBMI	GWAS	315284	30239722	27408618
GWAS_UKBiobankHRC_eu	HF	GWAS	394156	30586722	7745274
GWAS_UKBiobankHRC_eu	NICM	GWAS	394156	30586722	7745301
GWAS_UKBiobankModLeic	COPD	GWAS	257811	30804561	6231295
GWAS_UKBiobankMRI_eu	LVEDV	GWAS	36041	32382064	14546747
GWAS_UKBiobankMRI_eu	LVEDVI	GWAS	36041	32382064	14548490
GWAS_UKBiobankMRI_eu	LVEF	GWAS	36041	32382064	14546747
GWAS_UKBiobankMRI_eu	LVESV	GWAS	36041	32382064	14546747
GWAS_UKBiobankMRI_eu	LVESVI	GWAS	36041	32382064	14548490
GWAS_UKBiobankMRI_eu	SVI	GWAS	36041	32382064	14548490
GWAS_UKBiobankMRI_eu	SVL	GWAS	36041	32382064	14546747
GWAS_UKBiobankSnoring_eu	Snoring	GWAS	408317	32060260	11023944
GWAS_UKBiobankSnoring_eu_females	Snoring	GWAS	218346	32060260	11023836
GWAS_UKBiobankSnoring_eu_males	Snoring	GWAS	189971	32060260	11024190
GWAS_UKBiobankSnoringAdjBMI_eu	SnoringAdjBMI	GWAS	407066	32060260	11023952
GWAS_UKBiobankWakingUp_eu	EaseOfWakingUp	GWAS	451872	NA	19424237
GWAS_VHIR	Stroke_ischemic	GWAS	831	NA	8451142
GWAS_VHIR	toastCE	GWAS	831	NA	8434309
GWAS_VHIR	toastLAA	GWAS	831	NA	8413080
GWAS_VHIR	toastUNDETER	GWAS	831	NA	8405962
Ha2021_RhA_Mixed	RhA	GWAS	311292	33310728	12756659
Haas_2021_liverfat_EU	LiverFat	GWAS	36703	34957434	9802892
Hammerschlag2017_Insomnia_EU	SleepInsomnia	GWAS	113006	28604731	NA
Hammerschlag2017_Insomnia_EU_Females	SleepInsomnia	GWAS	59367	28604731	NA
Hammerschlag2017_Insomnia_EU_Males	SleepInsomnia	GWAS	53637	28604731	NA
Hartiala2021_MI_Mixed	MI	GWAS	639221	33532862	8125005
Helgeland2019_BMI_EU	BMI1_5yrs	GWAS	9286	31575865	8604788
Helgeland2019_BMI_EU	BMI1yr	GWAS	9286	31575865	8620728
Helgeland2019_BMI_EU	BMI2yrs	GWAS	9286	31575865	8610824
Helgeland2019_BMI_EU	BMI3mons	GWAS	9286	31575865	8620115
Helgeland2019_BMI_EU	BMI3yrs	GWAS	9286	31575865	8621443
Helgeland2019_BMI_EU	BMI5yrs	GWAS	9286	31575865	8612758
Helgeland2019_BMI_EU	BMI6mons	GWAS	9286	31575865	8609927
Helgeland2019_BMI_EU	BMI6wks	GWAS	9286	31575865	8617541
Helgeland2019_BMI_EU	BMI7yrs	GWAS	9286	31575865	8609606
Helgeland2019_BMI_EU	BMI8mons	GWAS	9286	31575865	8627226
Helgeland2019_BMI_EU	BMI8yrs	GWAS	9286	31575865	8620134
Helgeland2019_BMI_EU	BMIbirth	GWAS	9286	31575865	8622940
Helkkula2023_VaricoseVeins_EU	VaricoseVeins	GWAS	207055	36653477	16307078
Henkel2023_OA_EU	HipOAnoreplacement	GWAS	689962	36376028	26697203
Henkel2023_OA_EU	KneeOAnoreplacement	GWAS	689962	36376028	26697203
Henkel2023_OA_EU	KneeOAreplacement	GWAS	689962	36376028	26697203
Hindy2022_lipids_HS	CHOL	ExSeq	16440	34932938	827566
Hindy2022_lipids_AF	HDL	ExSeq	16507	34932938	996039
Hindy2022_lipids_AF	LDL	ExSeq	16507	34932938	987646
Hindy2022_lipids_AF	nonHDL	ExSeq	16507	34932938	995827
Hindy2022_lipids_AF	TG	ExSeq	16507	34932938	989160
Hindy2022_lipids_AF	TGtoHDL	ExSeq	16507	34932938	993194
Graham_2021_lipids_HS	CHOL	GWAS	49582	34887591	27047397
Hindy2022_lipids_EA	HDL	ExSeq	10420	34932938	616958
Hindy2022_lipids_EA	LDL	ExSeq	10420	34932938	609706
Hindy2022_lipids_EA	nonHDL	ExSeq	10420	34932938	616799
Hindy2022_lipids_EA	TG	ExSeq	10420	34932938	617008
Hindy2022_lipids_EA	TGtoHDL	ExSeq	10420	34932938	616279
ExSeq_52kQT	CHOL	ExSeq	49147	36280733	6220316
Hindy2022_lipids_EU	HDL	ExSeq	97493	34932938	4258892
Hindy2022_lipids_EU	LDL	ExSeq	97493	34932938	4334022
Hindy2022_lipids_EU	nonHDL	ExSeq	97493	34932938	4256705
Hindy2022_lipids_EU	TG	ExSeq	97493	34932938	4382899
Hindy2022_lipids_EU	TGtoHDL	ExSeq	97493	34932938	4247150
Wojcik2019_glycemic_Mixed	CHOL	GWAS	49796	31217584	30894398
Hindy2022_lipids_HS	HDL	ExSeq	16440	34932938	790027
Hindy2022_lipids_HS	LDL	ExSeq	16440	34932938	770924
Hindy2022_lipids_HS	nonHDL	ExSeq	16440	34932938	789689
Hindy2022_lipids_HS	TG	ExSeq	16440	34932938	825505
Hindy2022_lipids_HS	TGtoHDL	ExSeq	16440	34932938	789825
Hindy2022_lipids_Mixed	CHOL	ExSeq	172067	34932938	7379366
Hindy2022_lipids_Mixed	HDL	ExSeq	172067	34932938	7232827
Hindy2022_lipids_Mixed	LDL	ExSeq	172067	34932938	7247024
Hindy2022_lipids_Mixed	nonHDL	ExSeq	172067	34932938	7230073
Hindy2022_lipids_Mixed	TG	ExSeq	172067	34932938	7334827
Hindy2022_lipids_Mixed	TGtoHDL	ExSeq	172067	34932938	7202428
ExChip_GLGC	CHOL	ExChip	370613	29083407	310154
Hindy2022_lipids_SA	HDL	ExSeq	30025	34932938	1104921
Hindy2022_lipids_SA	LDL	ExSeq	30025	34932938	1075693
Hindy2022_lipids_SA	nonHDL	ExSeq	30025	34932938	1104559
Hindy2022_lipids_SA	TG	ExSeq	30025	34932938	1081799
Hindy2022_lipids_SA	TGtoHDL	ExSeq	30025	34932938	1080837
Hodgson2022_T2D_SA	T2D	GWAS	21070	35587468	9867243
Hoffmann2018_BMI_Mixed	BMI	GWAS	334487	30108127	27075444
Honigberg2023_Gestation_Mixed	GestationalHypertension	GWAS	468391	37248299	43464951
Honigberg2023_Gestation_Mixed	PreEclampsia	GWAS	468391	37248299	61371967
Horikoshi2016_FBW_EU	FBW	GWAS	133903	27680694	16237601
Hou2016_BIP_EU	BIP	GWAS	34950	27329760	9063797
Hou2016_LithiumBIP_EU	Lithium_response_inBIP_binary	GWAS	2343	26806518	5841167
Hou2016_LithiumBIP_EU	Lithium_response_inBIP_continuous	GWAS	2343	26806518	5841167
Hou2016_LithiumBIP_Mixed	Lithium_response_inBIP_binary	GWAS	2564	26806518	7021787
Hou2016_LithiumBIP_Mixed	Lithium_response_inBIP_continuous	GWAS	2564	26806518	7026045
Howard2018_DepressionBroad_EU	MDD	GWAS	322580	NA	NA
Howard2018_DepressionICD_EU	MDD	GWAS	217584	NA	NA
Howard2018_DepressionProbable_EU	MDD	GWAS	174519	NA	NA
Huang2021_Cardiometabolic_SA	BMI	GWAS	17348	35945198	9867243
Huang2021_Cardiometabolic_SA	CAD	GWAS	17348	35945198	5828375
Graham_2021_lipids_Mixed	CHOL	GWAS	1654950	34887591	52295975
Huang2021_Cardiometabolic_SA	DBP	GWAS	17348	35945198	9867243
Huang2021_Cardiometabolic_SA	HDL	GWAS	17348	35945198	9867243
Huang2021_Cardiometabolic_SA	LDL	GWAS	17348	35945198	9867243
Huang2021_Cardiometabolic_SA	SBP	GWAS	17348	35945198	9867243
Huang2021_Cardiometabolic_SA	TG	GWAS	17348	35945198	9867243
Hubel2018_Body_EU	BFP	GWAS	155961	30593698	7792639
Hubel2018_Body_EU	TB-LM	GWAS	155961	30593698	7792639
Hubel2018_Body_EU_Female	BFP	GWAS	70700	30593698	7792639
Hubel2018_Body_EU_Female	TB-LM	GWAS	70700	30593698	7792639
Hubel2018_Body_EU_Male	BFP	GWAS	85261	30593698	7792639
Hubel2018_Body_EU_Male	TB-LM	GWAS	85261	30593698	7792639
Huerta-ChagoyaA2022_T2DadjBMI_HS	T2DadjBMI	GWAS	18885	37148359	68673044
Huerta2023_SUGARMGH_Mixed	AUC_insulin_OGTT_metformin	GWAS	890	37233759	12181147
Huerta2023_SUGARMGH_Mixed	Change_in_fasting_glucose_after_metformin_adjusted_baseline_glucose	GWAS	890	37233759	12636139
Huerta2023_SUGARMGH_Mixed	Change_in_fasting_insulin_after_metformin_adjusted_baseline_insulin	GWAS	890	37233759	12436234
Huerta2023_SUGARMGH_Mixed	Change_in_HOMA_B_after_metformin	GWAS	890	37233759	12354539
Huerta2023_SUGARMGH_Mixed	Change_in_HOMA_IR_after_metformin	GWAS	890	37233759	12583356
Huerta2023_SUGARMGH_Mixed	Fasting_glucose_metformin_adjusted_baseline_glucose	GWAS	890	37233759	12639822
Huerta2023_SUGARMGH_Mixed	Fasting_insulin_metformin	GWAS	890	37233759	12499073
Huerta2023_SUGARMGH_Mixed	FG	GWAS	890	37233759	12883451
Huerta2023_SUGARMGH_Mixed	FI	GWAS	890	37233759	12691071
Huerta2023_SUGARMGH_Mixed	Glucose_120_min_glipizide_adjusted_baseline_glucose	GWAS	890	37233759	11310857
Huerta2023_SUGARMGH_Mixed	Glucose_120_min_OGTT_metformin_adjusted_baseline_glucose	GWAS	890	37233759	12503936
Huerta2023_SUGARMGH_Mixed	Glucose_180_min_glipizide_adjusted_baseline_glucose	GWAS	890	37233759	10873158
Huerta2023_SUGARMGH_Mixed	Glucose_240_min_glipizide_adjusted_baseline_glucose	GWAS	890	37233759	10693845
Huerta2023_SUGARMGH_Mixed	Glucose_30_min_glipizide_adjusted_baseline_glucose	GWAS	890	37233759	12704558
Huerta2023_SUGARMGH_Mixed	Glucose_30_min_OGTT_metformin_adjusted_baseline_glucose	GWAS	890	37233759	12523556
Huerta2023_SUGARMGH_Mixed	Glucose_60_min_glipizide_adjusted_baseline_glucose	GWAS	890	37233759	12687617
Huerta2023_SUGARMGH_Mixed	Glucose_60_min_OGTT_metformin_adjusted_baseline_glucose	GWAS	890	37233759	12530484
Huerta2023_SUGARMGH_Mixed	Glucose_90_min_glipizide_adjusted_baseline_glucose	GWAS	890	37233759	12006396
Huerta2023_SUGARMGH_Mixed	Glucose_trough_glipizide_adjusted_baseline_glucose	GWAS	890	37233759	10771020
Huerta2023_SUGARMGH_Mixed	Insulin_120_min_glipizide	GWAS	890	37233759	11208501
Huerta2023_SUGARMGH_Mixed	Insulin_120_min_OGTT_metformin	GWAS	890	37233759	12425729
Huerta2023_SUGARMGH_Mixed	Insulin_180_min_glipizide	GWAS	890	37233759	10753655
Huerta2023_SUGARMGH_Mixed	Insulin_240_min_glipizide	GWAS	890	37233759	10545839
Huerta2023_SUGARMGH_Mixed	Insulin_30_min_glipizide	GWAS	890	37233759	12517206
Huerta2023_SUGARMGH_Mixed	Insulin_30_min_OGTT_metformin	GWAS	890	37233759	12430426
Huerta2023_SUGARMGH_Mixed	Insulin_60_min_glipizide	GWAS	890	37233759	12533855
Huerta2023_SUGARMGH_Mixed	Insulin_60_min_OGTT_metformin	GWAS	890	37233759	12466642
Huerta2023_SUGARMGH_Mixed	Insulin_90_min_glipizide	GWAS	890	37233759	11929095
Huerta2023_SUGARMGH_Mixed	Peak_insulin_glipizide_adjusted_baseline_insulin	GWAS	890	37233759	10526641
Huerta2023_SUGARMGH_Mixed	Slope_to_glucose_recovery_glipizide_adjusted_baseline_glucose	GWAS	890	37233759	9976567
Huerta2023_SUGARMGH_Mixed	Slope_to_glucose_trough_glipizide_adjusted_baseline_glucose	GWAS	890	37233759	10758772
Huerta2023_SUGARMGH_Mixed	Time_to_glucose_trough_glipizide	GWAS	890	37233759	10771020
Huerta2023_SUGARMGH_Mixed	Time_to_peak_insulin_glipizide	GWAS	890	37233759	10771020
vanRheenen_2021_ALS_EU	ALS	GWAS	138086	34873335	10461755
ILAE2018_Epilepsy_EU	Epilepsy_FocalHS	GWAS	26878	30531953	4948008
ILAE2018_Epilepsy_EU	Epilepsy_FocalLN	GWAS	26878	30531953	4988157
ILAE2018_Epilepsy_EU	Epilepsy_GeneralizedTCS	GWAS	26878	30531953	4987322
Ishigaki2022_RhA_EA	RhA	GWAS	173633	36333501	11704724
Ishigaki2022_RhA_EA	SeropositiveRhA	GWAS	173633	36333501	7514459
Ishigaki2022_RhA_EU	RhA	GWAS	97173	36333501	13293556
Ishigaki2022_RhA_EU	SeropositiveRhA	GWAS	97173	36333501	10957505
Ishigaki2022_RhA_Mixed	RhA	GWAS	276020	36333501	21716940
Ishigaki2022_RhA_Mixed	SeropositiveRhA	GWAS	276020	36333501	13668682
Iwaki2019_Parkinsons_EU	ConstipationInPD	GWAS	4093	31505070	8555384
Iwaki2019_Parkinsons_EU	DaySleepInPD	GWAS	4093	31505070	8597203
Iwaki2019_Parkinsons_EU	DementiaInPD	GWAS	4093	31505070	8730782
Iwaki2019_Parkinsons_EU	DepressionInPD	GWAS	4093	31505070	7549224
Iwaki2019_Parkinsons_EU	DyskinesiasInPD	GWAS	4093	31505070	7656692
Iwaki2019_Parkinsons_EU	HY3inPD	GWAS	4093	31505070	7680444
Iwaki2019_Parkinsons_EU	HyinPD	GWAS	4093	31505070	8719353
Iwaki2019_Parkinsons_EU	HyposmiaInPD	GWAS	4093	31505070	8594543
Iwaki2019_Parkinsons_EU	InsomniaInPD	GWAS	4093	31505070	8611254
Iwaki2019_Parkinsons_EU	MMSEinPD	GWAS	4093	31505070	7692254
Iwaki2019_Parkinsons_EU	MOCAinPD	GWAS	4093	31505070	2868901
Iwaki2019_Parkinsons_EU	MotorFlucInPD	GWAS	4093	31505070	7694192
Iwaki2019_Parkinsons_EU	RBDinPD	GWAS	4093	31505070	8308316
Iwaki2019_Parkinsons_EU	RLinPD	GWAS	4093	31505070	2892798
Iwaki2019_Parkinsons_EU	SEADL70inPD	GWAS	4093	31505070	2728091
Iwaki2019_Parkinsons_EU	SEADLinPD	GWAS	4093	31505070	7660456
Iwaki2019_Parkinsons_EU	UPDRS	GWAS	4093	31505070	7715549
Iwaki2019_Parkinsons_EU	UPDRS1	GWAS	4093	31505070	7387524
Iwaki2019_Parkinsons_EU	UPDRS2	GWAS	4093	31505070	7268206
Iwaki2019_Parkinsons_EU	UPDRS3	GWAS	4093	31505070	8457140
Iwaki2019_Parkinsons_EU	UPDRS4	GWAS	4093	31505070	6991741
Ji2016_IBD_EU	PSC	GWAS	14890	27992413	7293118
Jiang_2021_GDM_EU	GDM	GWAS	7841	34737426	11831065
Jiang_2021_GDM-GT_EU	GDM_abnormal_gluc	GWAS	247540	34737426	11832029
John2022_AsthmaCOPD_EU	AsthmaCOPD	GWAS	48428	NA	NA
Jones2021_low_hand_grip_eu	LowGripEWGSOP	GWAS	256523	33510174	9457422
Jones2021_low_hand_grip_eu	LowGripFNIH	GWAS	256523	33510174	9465622
Jones2021_low_hand_grip_eu_female	LowGripEWGSOP	GWAS	132443	33510174	9449805
Jones2021_low_hand_grip_eu_female	LowGripFNIH	GWAS	132443	33510174	9431324
Jones2021_low_hand_grip_eu_male	LowGripEWGSOP	GWAS	118371	33510174	9464541
Jones2021_low_hand_grip_eu_male	LowGripFNIH	GWAS	118371	33510174	9471904
Jurgens2022_Quantitative_EU	Alb	GWAS	459135	NA	18165624
Jurgens2022_Quantitative_EU	ALP	GWAS	459135	NA	18776069
Jurgens2022_Quantitative_EU	ALT	GWAS	459135	NA	18773578
Jurgens2022_Quantitative_EU	ApoA	GWAS	459135	NA	18125932
Jurgens2022_Quantitative_EU	ApoB	GWAS	459135	NA	18729806
Jurgens2022_Quantitative_EU	AST	GWAS	459135	NA	18743783
Jurgens2022_Quantitative_EU	BasoCount	GWAS	459135	NA	18869212
Jurgens2022_Quantitative_EU	BasoPerc	GWAS	459135	NA	18869272
Jurgens2022_Quantitative_EU	BILIRUBIN	GWAS	459135	NA	18739693
Jurgens2022_Quantitative_EU	BMI	GWAS	459135	NA	19111635
Jurgens2022_Quantitative_EU	BS	GWAS	459135	NA	18156500
Jurgens2022_Quantitative_EU	Ca	GWAS	459135	NA	18163514
ExSeq_52kQT_SA	CHOL	ExSeq	4110	36280733	1591798
Jurgens2022_Quantitative_EU	Creatinine	GWAS	459135	NA	18772026
Jurgens2022_Quantitative_EU	CRP	GWAS	459135	NA	18760432
Jurgens2022_Quantitative_EU	CystatinC	GWAS	459135	NA	18774993
Jurgens2022_Quantitative_EU	DBP	GWAS	459135	NA	19155366
Jurgens2022_Quantitative_EU	DirectBilirubin	GWAS	459135	NA	17553203
Jurgens2022_Quantitative_EU	EosinCount	GWAS	459135	NA	18869212
Jurgens2022_Quantitative_EU	EosinPerc	GWAS	459135	NA	18869272
Jurgens2022_Quantitative_EU	GGT	GWAS	459135	NA	18772105
Jurgens2022_Quantitative_EU	HBA1C	GWAS	459135	NA	18442835
Jurgens2022_Quantitative_EU	HbConc	GWAS	459135	NA	18885940
Jurgens2022_Quantitative_EU	HDL	GWAS	459135	NA	18162356
Jurgens2022_Quantitative_EU	HEIGHT	GWAS	459135	NA	19121644
Jurgens2022_Quantitative_EU	HighScatReticuloCount	GWAS	459135	NA	18735992
Jurgens2022_Quantitative_EU	HighScatReticuloPerc	GWAS	459135	NA	18736002
Jurgens2022_Quantitative_EU	HmPerc	GWAS	459135	NA	18885939
Jurgens2022_Quantitative_EU	IGF1	GWAS	459135	NA	18732198
Jurgens2022_Quantitative_EU	ImReticuloFrac	GWAS	459135	NA	18735697
Jurgens2022_Quantitative_EU	LDL	GWAS	459135	NA	18752228
Jurgens2022_Quantitative_EU	LipoproteinA	GWAS	459135	NA	17339039
Jurgens2022_Quantitative_EU	LymphoCount	GWAS	459135	NA	18869212
Jurgens2022_Quantitative_EU	LymphoPerc	GWAS	459135	NA	18869272
Jurgens2022_Quantitative_EU	MeanCorpHb	GWAS	459135	NA	18875409
Jurgens2022_Quantitative_EU	MeanCorpHbConc	GWAS	459135	NA	18885889
Jurgens2022_Quantitative_EU	MeanCorpVol	GWAS	459135	NA	18885926
Jurgens2022_Quantitative_EU	MeanReticuloVol	GWAS	459135	NA	18735697
Jurgens2022_Quantitative_EU	MeanSpheredVol	GWAS	459135	NA	18736002
Jurgens2022_Quantitative_EU	MonoCount	GWAS	459135	NA	18869212
Jurgens2022_Quantitative_EU	MonoPerc	GWAS	459135	NA	18869272
Jurgens2022_Quantitative_EU	NeutCount	GWAS	459135	NA	18869212
Jurgens2022_Quantitative_EU	NeutroPerc	GWAS	459135	NA	18869272
Jurgens2022_Quantitative_EU	NucleatedRedCount	GWAS	459135	NA	18869121
Jurgens2022_Quantitative_EU	NucleatedRedPerc	GWAS	459135	NA	18869069
Jurgens2022_Quantitative_EU	Phosphate	GWAS	459135	NA	18151803
Jurgens2022_Quantitative_EU	PlatCount	GWAS	459135	NA	18885907
Jurgens2022_Quantitative_EU	PlatCrit	GWAS	459135	NA	18885871
Jurgens2022_Quantitative_EU	PlatDistWidth	GWAS	459135	NA	18885863
Jurgens2022_Quantitative_EU	PlatVol	GWAS	459135	NA	18885863
Jurgens2022_Quantitative_EU	PulseRate	GWAS	459135	NA	19155366
Jurgens2022_Quantitative_EU	RBCDistWidth	GWAS	459135	NA	18885926
Jurgens2022_Quantitative_EU	RedCount	GWAS	459135	NA	18885939
Jurgens2022_Quantitative_EU	ReticuloCount	GWAS	459135	NA	18735992
Jurgens2022_Quantitative_EU	ReticuloPerc	GWAS	459135	NA	18735998
Jurgens2022_Quantitative_EU	SBP	GWAS	459135	NA	19155351
Jurgens2022_Quantitative_EU	SerumUrea	GWAS	459135	NA	18770989
Jurgens2022_Quantitative_EU	SHBG	GWAS	459135	NA	18097609
Jurgens2022_Quantitative_EU	Testosterone_total	GWAS	459135	NA	NA
Jurgens2022_Quantitative_EU	TG	GWAS	459135	NA	18770272
Jurgens2022_Quantitative_EU	TotalProtein	GWAS	459135	NA	18160059
Jurgens2022_Quantitative_EU	Urate	GWAS	459135	NA	18756047
Jurgens2022_Quantitative_EU	VitD	GWAS	459135	NA	18467048
Jurgens2022_Quantitative_EU	WBC	GWAS	459135	NA	18876207
Jurgens2022_Quantitative_EU	WEIGHT	GWAS	459135	NA	19119897
Keene2020_Stroke_AA	Stroke	GWAS	22051	32693751	14998043
Kessler2022_CHIP_AF	CHIP	ExSeq	8552	36450978	43048152
Kessler2022_CHIP_EA	CHIP	ExSeq	2145	36450978	17040484
Kessler2022_CHIP_EU	CHIP	ExSeq	418401	36450978	61736688
Kessler2022_CHIP_EU	CHIP_ASXL1	ExSeq	418401	36450978	61112255
Kessler2022_CHIP_EU	CHIP_DNMT3A	ExSeq	418401	36450978	61499014
Kessler2022_CHIP_EU	CHIP_JAK2	ExSeq	418401	36450978	61064644
Kessler2022_CHIP_EU	CHIP_PPM1D	ExSeq	418401	36450978	61076705
Kessler2022_CHIP_EU	CHIP_SF3B1	ExSeq	418401	36450978	61061971
Kessler2022_CHIP_EU	CHIP_SRSF2	ExSeq	418401	36450978	61063438
Kessler2022_CHIP_EU	CHIP_TET2	ExSeq	418401	36450978	61163632
Kessler2022_CHIP_EU	CHIP_TP53	ExSeq	418401	36450978	61069401
Kessler2022_CHIP_EU	CHIPwithoutmCA	ExSeq	418401	36450978	61615511
Kessler2022_CHIP_EU	mCAA	ExSeq	418401	36450978	61346460
Kessler2022_CHIP_EU	mCAX	ExSeq	418401	36450978	56681548
Kessler2022_CHIP_EU	mCAY	ExSeq	418401	36450978	54898473
Kessler2022_CHIP_EU	TL	ExSeq	418401	36450978	62861434
Kessler2022_CHIP_SA	CHIP	ExSeq	9548	36450978	34578903
Khurshid2023_AF_Mixed	LVmass	GWAS	43230	36944631	9851680
Khurshid2023_AF_Mixed	LVmassBSAindexed	GWAS	43230	36944631	9851680
Kim2022_MetabolicTraits_EA	ALT	GWAS	288127	36333282	8284039
Kim2022_MetabolicTraits_EA	AST	GWAS	288127	36333282	8284305
Huang2021_Cardiometabolic_SA	CHOL	GWAS	17348	35945198	9867243
Kim2022_MetabolicTraits_EA	FG	GWAS	288127	36333282	8281985
Kim2022_MetabolicTraits_EA	GGT	GWAS	288127	36333282	8282562
Kim2022_MetabolicTraits_EA	HBA1C	GWAS	288127	36333282	8283596
Kim2022_MetabolicTraits_EA	HDL	GWAS	288127	36333282	8281972
Kim2022_MetabolicTraits_EA	LDL	GWAS	288127	36333282	8282175
Kim2022_MetabolicTraits_EA	TG	GWAS	288127	36333282	8277036
Kim2023_Parkinsons_Mixed	Parkinsons	GWAS	1028993	38155330	8937061
Kiryluk2023_IgAN_Mixed	IgAN	GWAS	38897	37337107	10015430
Klimentidis2018_PhysicalActivity_EU	PA_AvgAcc	GWAS	377234	29899525	11824711
Klimentidis2018_PhysicalActivity_EU	PA_FracTimeAcc425MG	GWAS	377234	29899525	11826725
Klimentidis2018_PhysicalActivity_EU	PA_ModerateToVigorous	GWAS	377234	29899525	11836573
Klimentidis2018_PhysicalActivity_EU	PA_Vigorous	GWAS	377234	29899525	11832550
Klimentidis2020_LDL_EU	LDL	GWAS	431167	32493714	15216507
Knol2020_brain_microbleeds_mixed	BMB_any_noexclusions	GWAS	29418	32913026	6808001
Knol2020_brain_microbleeds_mixed	BMB_any_withexclusions	GWAS	29418	32913026	6744520
Knol2020_brain_microbleeds_mixed	BMB_mixed_or_strictlydeep_noexclusions	GWAS	29418	32913026	5802478
Knol2020_brain_microbleeds_mixed	BMB_mixed_or_strictlydeep_withexclusions	GWAS	29418	32913026	6131445
Knol2020_brain_microbleeds_mixed	BMB_strictlylobar_noexclusions	GWAS	29418	32913026	6386864
Knol2020_brain_microbleeds_mixed	BMB_strictlylobar_withexclusions	GWAS	29418	32913026	6321660
Koyama2020_CAD_EA	CAD	GWAS	168228	33020668	19707525
Kunkle2019_Alzheimers_eu	LateAD	GWAS	63926	30820047	11479985
Kurki2023_FinnGen_EU	AD	GWAS	342499	36653562	20055308
Kurki2023_FinnGen_EU	AfibFlutter	GWAS	342499	36653562	20048491
Kurki2023_FinnGen_EU	AMD	GWAS	342499	36653562	20054896
Kurki2023_FinnGen_EU	AnkylosingSpondylitis	GWAS	342499	36653562	20051731
Kurki2023_FinnGen_EU	Asthma	GWAS	342499	36653562	20049771
Kurki2023_FinnGen_EU	CataractSenile	GWAS	342499	36653562	20055196
Kurki2023_FinnGen_EU	Eczema	GWAS	342499	36653562	20054711
Kurki2023_FinnGen_EU	MI	GWAS	342499	36653562	20054247
Kurki2023_FinnGen_EU	POAG	GWAS	342499	36653562	20055094
Kurki2023_FinnGen_EU	Psoriasis	GWAS	342499	36653562	20055237
Kurki2023_FinnGen_EU	SeropositiveRhA	GWAS	342499	36653562	20052653
Kurki2023_FinnGen_EU	T1D	GWAS	342499	36653562	20053489
Kurki2023_FinnGen_EU	T2D	GWAS	342499	36653562	20055021
Lagou2021_FGFI_EU	FG	GWAS	151188	33402679	8536902
Lagou2021_FGFI_EU	FI	GWAS	151188	33402679	8530037
Lagou2021_FGFI_females_EU	FG	GWAS	73089	33402679	8515014
Lagou2021_FGFI_females_EU	FI	GWAS	73089	33402679	8510848
Lagou2021_FGFI_males_EU	FG	GWAS	67506	33402679	8518271
Lagou2021_FGFI_males_EU	FI	GWAS	67506	33402679	8512498
Lahrouchi2020_long_qt_syndrome_mixed	LongQT	GWAS	11546	32429735	8446321
Laisk2020_Miscarriage_EU	SporadicMiscarriage	GWAS	224105	33239672	29634304
Lake2023_AD_Mixed	AD	GWAS	644188	37198259	7525151
Lambert2013_AD_EU	LateAD	GWAS	54162	24162737	7034789
Le2022_InternalOrgansAge_EU	AbAge	GWAS	40760	35418184	20134200
Le2022_InternalOrgansAge_EU	LiverAge	GWAS	40760	35418184	20134200
Le2022_InternalOrgansAge_EU	PanAge	GWAS	40760	35418184	20134200
Lee2018_Education_EU	CogPerformance	GWAS	257841	30038396	10096884
Levin2022_HF_Mixed	HF	GWAS	1665481	36376295	18503178
Li2022_UMOD_EU	UMOD_aptamer	GWAS	18070	35446786	8815557
Li2022_UMOD_Mixed	UMOD_antibody	GWAS	13985	35446786	10735251
Liang2017_BP_AF	DBP	GWAS	31968	28498854	20865126
Liang2017_BP_AF	HYPERTENSION	GWAS	31968	28498854	20817075
Liang2017_BP_AF	PulsePress	GWAS	31968	28498854	20857641
Liang2017_BP_AF	SBP	GWAS	31968	28498854	20772289
Lin2021_eGFR_Mixed	eGFRcrea	WGS	23732	33418499	43125904
Liu2021_NeckCircumference_Mixed	NeckCir	GWAS	15090	33907307	8865547
Liu2021_NeckCircumference_Mixed	NeckCiradjBMI	GWAS	15090	33907307	8865513
Liu2021_NeckCircumference_Mixed_females	NeckCir	GWAS	6762	33907307	7322639
Liu2021_NeckCircumference_Mixed_females	NeckCiradjBMI	GWAS	6762	33907307	7322639
Liu2021_NeckCircumference_Mixed_males	NeckCir	GWAS	8328	33907307	7784259
Liu2021_NeckCircumference_Mixed_males	NeckCiradjBMI	GWAS	8328	33907307	7789444
Liu2021_OrganTraits_EU	Kidney_volume	GWAS	32860	34128465	8748900
Liu2021_OrganTraits_EU	Liver_volume	GWAS	32860	34128465	8748900
Liu2021_OrganTraits_EU	LiverIron	GWAS	32860	34128465	8748900
Liu2021_OrganTraits_EU	Lung_volume	GWAS	32860	34128465	8748900
Liu2021_OrganTraits_EU	Pancreas_volume	GWAS	32860	34128465	8748900
Liu2021_OrganTraits_EU	PancreasFat	GWAS	32860	34128465	8748900
Liu2021_OrganTraits_EU	PancreasIron	GWAS	32860	34128465	8748900
Liu2021_OrganTraits_EU	SAT	GWAS	32860	34128465	8748900
Liu2021_OrganTraits_EU	Spleen_volume	GWAS	32860	34128465	8748900
Liu2021_OrganTraits_EU	VAT	GWAS	32860	34128465	8748900
Liu2022_eGFRcrea_Mixed	eGFRcrea	GWAS	1508659	35710981	12653797
Liu2023_IBD_EA	CD	GWAS	29849	37156999	13460866
Liu2023_IBD_EA	IBD	GWAS	29849	37156999	13454067
Liu2023_IBD_EA	UC	GWAS	29849	37156999	13457516
Liu2023_IBD_Mixed	CD	GWAS	398668	37156999	22985225
Liu2023_IBD_Mixed	IBD	GWAS	398668	37156999	23009680
Liu2023_IBD_Mixed	UC	GWAS	398668	37156999	22964492
Loesch2021_Parkinsons_HS	Parkinsons	GWAS	1497	34227697	8670188
LoFaro2022_POAG_EA	POAG	GWAS	269960	38382466	7177619
LoFaro2022_POAG_EU	POAG	GWAS	1172905	38382466	27382448
LoFaro2022_POAG_Mixed	POAG	GWAS	1487447	38382466	33040489
LoFaro2022_POAG_Mixed_Female	POAG	GWAS	582981	38382466	25191959
LoFaro2022_POAG_Mixed_Male	POAG	GWAS	498040	38382466	23600088
Loh2022_T2D_SA	T2D	GWAS	50533	35393509	14757057
Loh2022_T2D_SA	T2DadjBMI	GWAS	50533	35393509	14645638
Luciano2017_Neuroticism_EU	Neuroticism	GWAS	329821	29255261	18471663
Mahajan2015_glycemic_EU	FGadjBMI	ExChip	33231	25625282	106430
Mahajan2015_glycemic_EU	FIadjBMI	ExChip	33231	25625282	104703
Mahajan2022_T2D_EA	T2D	GWAS	283423	35551307	9106248
Mahajan2022_T2D_EU	T2D	GWAS	933970	35551307	10454875
Mahajan2022_T2D_Mixed	T2D	GWAS	1339889	35551307	10454873
Mahajan2022_T2D_SA	T2D	GWAS	49492	35551307	10401621
Mansour2021_DiabetesSubtypes_EU	T2D	GWAS	12230	34737425	5398633
Mansour2021_DiabetesSubtypes_EU	T2D_age-related	GWAS	12230	34737425	5396832
Mansour2021_DiabetesSubtypes_EU	T2D_autoimmune	GWAS	12230	34737425	5396033
Mansour2021_DiabetesSubtypes_EU	T2D_insulin-deficient	GWAS	12230	34737425	5397481
Mansour2021_DiabetesSubtypes_EU	T2D_insulin-resistant	GWAS	12230	34737425	5396538
Mansour2021_DiabetesSubtypes_EU	T2D_obesity-related	GWAS	12230	34737425	5399276
Marioni2018_ADFamilyHistory_EU	Family_AD_history	GWAS	314278	29777097	7793212
Marioni2018_ADFamilyHistory_EU	Maternal_AD_history	GWAS	314278	29777097	7793212
Marioni2018_ADFamilyHistory_EU	Paternal_AD_history	GWAS	314278	29777097	7793212
Martin2017_ADHD_EU_Females	ADHD	GWAS	21191	29325848	6888471
Martin2017_ADHD_EU_Males	ADHD	GWAS	32012	29325848	6913019
Matsunaga2020_CAD_ea	CAD	GWAS	51442	32469254	5968989
Maukonen2020_Finnish_chronotype_eu	ChronotypeSingle	GWAS	8433	32579418	5839185
Maukonen2020_Finnish_chronotype_eu	smeq_binary	GWAS	8433	32579418	5839185
Maukonen2020_Finnish_chronotype_eu	smeq_cont	GWAS	8433	32579418	5839185
McCartney2021_EAA_AA	DNAme_PAI1	GWAS	6149	34187551	12988751
McCartney2021_EAA_AA	EAA_Grim	GWAS	6149	34187551	12987938
McCartney2021_EAA_AA	EAA_Hannum	GWAS	6149	34187551	12988204
McCartney2021_EAA_AA	EAA_Intrinsic	GWAS	6149	34187551	12988462
McCartney2021_EAA_AA	EAA_Pheno	GWAS	6149	34187551	12987537
McCartney2021_EAA_EU	DNAme_PAI1	GWAS	34467	34187551	7566645
McCartney2021_EAA_EU	EAA_Grim	GWAS	34467	34187551	7567178
McCartney2021_EAA_EU	EAA_Hannum	GWAS	34467	34187551	7564524
McCartney2021_EAA_EU	EAA_Intrinsic	GWAS	34467	34187551	7567008
McCartney2021_EAA_EU	EAA_Pheno	GWAS	34467	34187551	7567062
McCartney2021_EAA_Mixed	DNAme_PAI1	GWAS	40615	34187551	6210372
McCartney2021_EAA_Mixed	EAA_Grim	GWAS	40615	34187551	6210095
McCartney2021_EAA_Mixed	EAA_Hannum	GWAS	40615	34187551	6209859
McCartney2021_EAA_Mixed	EAA_Intrinsic	GWAS	40615	34187551	6210600
McCartney2021_EAA_Mixed	EAA_Pheno	GWAS	40615	34187551	6209716
Meng2019_KneePain_EU	KneePain	GWAS	171516	31482140	15273966
Merino2022_DietaryIntake_EU	CarbIntake	GWAS	191157	34426670	12400759
Merino2022_DietaryIntake_EU	CarbIntakeBMIadj	GWAS	191157	34426670	12799593
Merino2022_DietaryIntake_EU	FatIntake	GWAS	191157	34426670	12398505
Merino2022_DietaryIntake_EU	FatIntakeBMIadj	GWAS	191157	34426670	12789909
Merino2022_DietaryIntake_EU	ProteinIntake	GWAS	191157	34426670	12402599
Merino2022_DietaryIntake_EU	ProteinIntakeBMIadj	GWAS	191157	34426670	12800859
Mishra2022_Stroke_AA	Stroke	GWAS	23991	36180795	10830182
Mishra2022_Stroke_AA	Stroke_cardioembolic	GWAS	23991	36180795	6634290
Mishra2022_Stroke_AA	Stroke_ischemic	GWAS	23991	36180795	8355656
Mishra2022_Stroke_AA	Stroke_largeartery	GWAS	23991	36180795	5298014
Mishra2022_Stroke_AA	Stroke_smallvessel	GWAS	23991	36180795	5258729
Mishra2022_Stroke_EA	Stroke	GWAS	264655	36180795	6788702
Mishra2022_Stroke_EA	Stroke_cardioembolic	GWAS	264655	36180795	5168877
Mishra2022_Stroke_EA	Stroke_ischemic	GWAS	264655	36180795	6724175
Mishra2022_Stroke_EA	Stroke_largeartery	GWAS	264655	36180795	5992233
Mishra2022_Stroke_EA	Stroke_smallvessel	GWAS	264655	36180795	6172839
Mishra2022_Stroke_EU	Stroke	GWAS	1308460	36180795	7510402
Mishra2022_Stroke_EU	Stroke_cardioembolic	GWAS	1308460	36180795	6658927
Mishra2022_Stroke_EU	Stroke_ischemic	GWAS	1308460	36180795	7480968
Mishra2022_Stroke_EU	Stroke_largeartery	GWAS	1308460	36180795	5784073
Mishra2022_Stroke_EU	Stroke_smallvessel	GWAS	1308460	36180795	5973275
Mishra2022_Stroke_HS	Stroke	GWAS	5662	36180795	7717678
Mishra2022_Stroke_HS	Stroke_cardioembolic	GWAS	5662	36180795	7403435
Mishra2022_Stroke_HS	Stroke_ischemic	GWAS	5662	36180795	7276637
Mishra2022_Stroke_HS	Stroke_largeartery	GWAS	5662	36180795	7175616
Mishra2022_Stroke_HS	Stroke_smallvessel	GWAS	5662	36180795	7356477
Mishra2022_Stroke_Mixed	Stroke	GWAS	1614080	36180795	7587194
Mishra2022_Stroke_Mixed	Stroke_cardioembolic	GWAS	1614080	36180795	6613784
Mishra2022_Stroke_Mixed	Stroke_ischemic	GWAS	1614080	36180795	7406798
Mishra2022_Stroke_Mixed	Stroke_largeartery	GWAS	1614080	36180795	5979248
Mishra2022_Stroke_Mixed	Stroke_smallvessel	GWAS	1614080	36180795	6394696
Mishra2022_Stroke_SA	Stroke	GWAS	11312	36180795	3306413
Mishra2022_Stroke_SA	Stroke_cardioembolic	GWAS	11312	36180795	3936235
Mishra2022_Stroke_SA	Stroke_ischemic	GWAS	11312	36180795	3306410
Mishra2022_Stroke_SA	Stroke_largeartery	GWAS	11312	36180795	3863577
Mishra2022_Stroke_SA	Stroke_smallvessel	GWAS	11312	36180795	3802675
Miyazawa2023_AF_Mixed	AF	GWAS	1244730	36653681	5000030
Moreno2019_Alzheimers_eu	AD	GWAS	7409	31473137	7747925
Nagel2018_Neuroticism_EU	Neuroticism_DepressedAffect	GWAS	357957	29942085	10845630
Nagel2018_Neuroticism_EU	Neuroticism_Worry	GWAS	357957	29942085	10845630
Nalls2019_Parkinsons_eu	Parkinsons	GWAS	482730	31701892	NA
Namjou_2019_NAFLD_EU	NAFLD	GWAS	9677	31311600	7260841
Namjou_2019_NAFLD_EU	NAFLDfibrosis	GWAS	9677	31311600	6161925
[truncated: 603 more rows]

## Sheet: Table S2
Trait	GWAS Catalog Study IDs
http://www.ebi.ac.uk/efo/EFO_0021898	GCST90269581
http://www.ebi.ac.uk/efo/EFO_0803360	GCST90244757,GCST90244759,GCST90244760,GCST90256681,GCST90256682,GCST90256683
http://www.ebi.ac.uk/efo/EFO_0007860	GCST007279,GCST003657,GCST009812,GCST010542,GCST90239692
http://www.ebi.ac.uk/efo/EFO_0021899	GCST90269623
http://www.ebi.ac.uk/efo/EFO_0803361	GCST90244767
http://www.ebi.ac.uk/efo/EFO_0803362	GCST90295945,GCST90295946,GCST90244756,GCST90244757,GCST90244758,GCST90244759,GCST90244760,GCST90256681,GCST90256682,GCST90256683,GCST90256684,GCST90256685,GCST90256686,GCST90256687,GCST90256688,GCST90256689,GCST90256690,GCST90256691,GCST90256692,GCST90256693,GCST90256694,GCST90256695,GCST90256696,GCST90256697,GCST90256698
http://www.ebi.ac.uk/efo/EFO_0007863	GCST010578
http://www.ebi.ac.uk/efo/EFO_0803363	GCST90104210,GCST90244774,GCST90244782
http://www.ebi.ac.uk/efo/EFO_0803364	GCST90244775,GCST90244783
http://purl.obolibrary.org/obo/MONDO_0002076	GCST90080152,GCST90084139,GCST90084138,GCST90080153,GCST90018682,GCST90018902,GCST90246127
http://www.ebi.ac.uk/efo/EFO_0007864	GCST003723,GCST90026009,GCST90266021,GCST90266022,GCST90140728,GCST90245441,GCST90103204,GCST90202334,GCST90201297,GCST90199896,GCST90203336,GCST90300242
http://www.ebi.ac.uk/efo/EFO_0803365	GCST90244669
http://www.ebi.ac.uk/efo/EFO_0007865	GCST006942,GCST006923,GCST006924,GCST90042742,GCST90271704,GCST90082358,GCST90078372,GCST003773,GCST003771,GCST003772,GCST012110,GCST009463,GCST013156,GCST90267288,GCST90267289
http://purl.obolibrary.org/obo/HP_0100806	GCST002725,GCST90104583,GCST90104584,GCST90079544,GCST90083532,GCST90083530,GCST90083531,GCST90079545,GCST90079546,GCST90044692,GCST90017227,GCST90017228,GCST011598,GCST011595,GCST011594,GCST90244712,GCST90281174,GCST90281175,GCST90281176,GCST90281177,GCST90281178,GCST90281179,GCST90281180,GCST90281183,GCST90270871
http://www.ebi.ac.uk/efo/EFO_0803366	GCST90270127,GCST90244681,GCST90244682
http://purl.obolibrary.org/obo/MONDO_0002078	GCST011985
http://www.ebi.ac.uk/efo/EFO_0803367	GCST90250902,GCST90250903,GCST90250904
http://purl.obolibrary.org/obo/OBA_2042530	GCST90234150
http://purl.obolibrary.org/obo/HP_0001744	GCST90084791,GCST90084790,GCST90080804,GCST90080805
http://www.ebi.ac.uk/efo/EFO_0803368	GCST90255366
http://purl.obolibrary.org/obo/OBA_2042531	GCST90236918
http://www.ebi.ac.uk/efo/EFO_0803369	GCST90255363,GCST90255362
http://purl.obolibrary.org/obo/OBA_2042532	GCST90233653
http://www.ebi.ac.uk/efo/EFO_0007869	GCST005325,GCST005328,GCST003766,GCST003767,GCST003768,GCST90078471,GCST90081313,GCST90081314,GCST90078542,GCST90078545,GCST90078543,GCST90078544,GCST90081304,GCST90079197,GCST90079195,GCST90079198,GCST90079194,GCST90079199,GCST90079196,GCST90104627,GCST90032654,GCST90032657,GCST90032159,GCST90032160,GCST90032161,GCST90032162,GCST90032163,GCST90032164,GCST90042789,GCST90044037,GCST006665,GCST9007…
http://purl.obolibrary.org/obo/OBA_2042533	GCST90239453
http://purl.obolibrary.org/obo/OBA_2042534	GCST90236418
http://purl.obolibrary.org/obo/OBA_2042535	GCST90235920
http://purl.obolibrary.org/obo/OBA_2042536	GCST90236637
http://purl.obolibrary.org/obo/OBA_2042537	GCST90234945
http://purl.obolibrary.org/obo/OBA_2042538	GCST90238720
http://purl.obolibrary.org/obo/OBA_2042539	GCST90238404
http://www.ebi.ac.uk/efo/EFO_0020570	GCST90101318,GCST90162455,GCST90248420
http://www.ebi.ac.uk/efo/EFO_0020571	GCST90241936,GCST90101319,GCST90237147,GCST90161537,GCST90248473
http://www.ebi.ac.uk/efo/EFO_0020572	GCST90241941,GCST90101320,GCST90237901,GCST90162363
http://www.ebi.ac.uk/efo/EFO_0020573	GCST90241942,GCST90101321,GCST90237677,GCST90162112,GCST90249877
http://www.ebi.ac.uk/efo/EFO_0020574	GCST90241948,GCST90101322,GCST90237238,GCST90161636,GCST90248404
http://www.ebi.ac.uk/efo/EFO_0020575	GCST90101323,GCST90237788,GCST90162236,GCST90225823
http://www.ebi.ac.uk/efo/EFO_0020576	GCST90101324,GCST90237789,GCST90162237,GCST90248405
http://www.ebi.ac.uk/efo/EFO_0020577	GCST90241949,GCST90101325,GCST90237790,GCST90162238,GCST90248406
http://www.ebi.ac.uk/efo/EFO_0802040	GCST90242730
http://www.ebi.ac.uk/efo/EFO_0020578	GCST90241950,GCST90101326,GCST90237791,GCST90162239,GCST90248407
http://www.ebi.ac.uk/efo/EFO_0802041	GCST90242731
http://www.ebi.ac.uk/efo/EFO_0020579	GCST90241951,GCST90101327,GCST90237126,GCST90161516,GCST90248408
http://www.ebi.ac.uk/efo/EFO_0802042	GCST90242735,GCST90249447
http://www.ebi.ac.uk/efo/EFO_0802043	GCST90242737,GCST90249610
http://www.ebi.ac.uk/efo/EFO_0010060	GCST008308
http://www.ebi.ac.uk/efo/EFO_0802044	GCST90242738,GCST90247375
http://www.ebi.ac.uk/efo/EFO_0802045	GCST90242740,GCST90249645
http://www.ebi.ac.uk/efo/EFO_0010062	GCST008292,GCST008294,GCST008293
http://www.ebi.ac.uk/efo/EFO_0802046	GCST90242741,GCST90249481
http://purl.obolibrary.org/obo/OBA_2041210	GCST90234908
http://www.ebi.ac.uk/efo/EFO_0802047	GCST90242743
http://purl.obolibrary.org/obo/OBA_2041211	GCST90235116
http://www.ebi.ac.uk/efo/EFO_0802048	GCST90242744,GCST90249485
http://purl.obolibrary.org/obo/OBA_2041212	GCST90238550
http://www.ebi.ac.uk/efo/EFO_0802049	GCST90242746,GCST90249487
http://www.ebi.ac.uk/efo/EFO_0010065	GCST008314
http://purl.obolibrary.org/obo/OBA_2041213	GCST90236779
http://www.ebi.ac.uk/efo/EFO_0010066	GCST90079339,GCST90079335,GCST90083325,GCST90083321,GCST008315,GCST008277,GCST011391,GCST90103355,GCST90103356
http://purl.obolibrary.org/obo/OBA_2041214	GCST90233290
http://www.ebi.ac.uk/efo/EFO_0010067	GCST90079340,GCST90079336,GCST90083326,GCST90100568,GCST90308682,GCST008318,GCST90102517,GCST008276,GCST011390,GCST90103357,GCST90103358
http://purl.obolibrary.org/obo/OBA_2041215	GCST90236944
http://www.ebi.ac.uk/efo/EFO_0010068	GCST009277,GCST008292
http://purl.obolibrary.org/obo/OBA_2041216	GCST90238195
http://www.ebi.ac.uk/efo/EFO_0010069	GCST008313
http://purl.obolibrary.org/obo/OBA_2041217	GCST90235640
http://purl.obolibrary.org/obo/OBA_2041218	GCST90233526
http://purl.obolibrary.org/obo/HP_0004308	GCST90018720,GCST90018940
http://purl.obolibrary.org/obo/OBA_2041219	GCST90235693
http://purl.obolibrary.org/obo/OBA_2045100	GCST90277309,GCST90244262,GCST90244441
http://purl.obolibrary.org/obo/OBA_2045101	GCST90277310,GCST90244263,GCST90244442
http://purl.obolibrary.org/obo/OBA_2045102	GCST90277311,GCST90244264,GCST90244443
http://www.ebi.ac.uk/efo/EFO_0005210	GCST001889,GCST90165317,GCST90165318,GCST009730,GCST009729,GCST009728,GCST009727,GCST90005091,GCST90005092,GCST90005093,GCST90005094,GCST90005095,GCST90005096,GCST90005097,GCST90005098,GCST90005099,GCST90005100,GCST90005101,GCST90005102,GCST90005103,GCST90005104,GCST90005105,GCST90005106,GCST90005107,GCST90005108,GCST90005109,GCST90005110,GCST90005111,GCST90005112,GCST90005113,GCST90005114,GCST90…
http://purl.obolibrary.org/obo/OBA_2045103	GCST90277312,GCST90244265,GCST90244444
http://purl.obolibrary.org/obo/OBA_2042080	GCST90235257
http://www.ebi.ac.uk/efo/EFO_0005211	GCST001910
http://purl.obolibrary.org/obo/OBA_2050400	GCST90300385
http://purl.obolibrary.org/obo/OBA_2045104	GCST90277313,GCST90244266,GCST90244445
http://purl.obolibrary.org/obo/OBA_2042081	GCST90238361
http://purl.obolibrary.org/obo/OBA_2050401	GCST90300391
http://purl.obolibrary.org/obo/OBA_2045105	GCST90277267,GCST90244399,GCST90244220
http://purl.obolibrary.org/obo/OBA_2042082	GCST90235175
http://www.ebi.ac.uk/efo/EFO_0005213	GCST005667,GCST006366,GCST006367,GCST009414,GCST009415,GCST006050,GCST006049,GCST003856,GCST008317,GCST90102518,GCST90000654
http://purl.obolibrary.org/obo/OBA_2050402	GCST90300391
http://purl.obolibrary.org/obo/OBA_2045106	GCST90277314,GCST90244267,GCST90244446
http://purl.obolibrary.org/obo/OBA_2042083	GCST90236655
http://purl.obolibrary.org/obo/OBA_2050403	GCST90299841
http://purl.obolibrary.org/obo/OBA_2045107	GCST90277315,GCST90244268,GCST90244447
http://purl.obolibrary.org/obo/OBA_2042084	GCST90238505
http://purl.obolibrary.org/obo/OBA_2045108	GCST90277316,GCST90244269,GCST90244448
http://purl.obolibrary.org/obo/OBA_2042085	GCST90236491
http://purl.obolibrary.org/obo/OBA_2045109	GCST90277317,GCST90244270,GCST90244449
http://purl.obolibrary.org/obo/OBA_2042086	GCST90232802
http://www.ebi.ac.uk/efo/EFO_0802500	GCST90240988,GCST90247231
http://purl.obolibrary.org/obo/OBA_2050406	GCST90299528
http://purl.obolibrary.org/obo/OBA_2042087	GCST90236360
http://purl.obolibrary.org/obo/OBA_2043870	GCST90234483
http://www.ebi.ac.uk/efo/EFO_0802501	GCST90240990,GCST90247871
http://purl.obolibrary.org/obo/OBA_2050407	GCST90300006
http://purl.obolibrary.org/obo/OBA_2042088	GCST90238801
http://purl.obolibrary.org/obo/OBA_2043871	GCST90238680
http://www.ebi.ac.uk/efo/EFO_0802502	GCST90240992,GCST90246923
http://purl.obolibrary.org/obo/OBA_2001030	GCST006290,GCST006291,GCST90239747
http://purl.obolibrary.org/obo/OBA_2050408	GCST90300217
http://purl.obolibrary.org/obo/OBA_2043872	GCST90233863
http://purl.obolibrary.org/obo/OBA_2042089	GCST90234003
http://www.ebi.ac.uk/efo/EFO_0802503	GCST90240993,GCST90247365
http://www.ebi.ac.uk/efo/EFO_1001331	GCST90041851,GCST90041852,GCST90042877
http://purl.obolibrary.org/obo/OBA_2050409	GCST90301166
http://purl.obolibrary.org/obo/OBA_2043873	GCST90239379
http://www.ebi.ac.uk/efo/EFO_0010520	GCST90134141,GCST90134142,GCST90134143,GCST90134144,GCST90134145,GCST90134146,GCST90134148,GCST90134149,GCST90134150,GCST90134153,GCST90134154,GCST90134157,GCST90134158,GCST90134159,GCST90134160,GCST90134161,GCST90134162,GCST90134163,GCST90257517,GCST90258122,GCST90258272,GCST90257667,GCST90271658,GCST90271675
http://www.ebi.ac.uk/efo/EFO_0802504	GCST90240995
http://purl.obolibrary.org/obo/OBA_2001032	GCST002261
http://www.ebi.ac.uk/efo/EFO_0010521	GCST90176069,GCST90301107
http://purl.obolibrary.org/obo/OBA_2043874	GCST90233415
http://www.ebi.ac.uk/efo/EFO_0802505	GCST90240996,GCST90247865
http://www.ebi.ac.uk/efo/EFO_0009100	GCST005759
http://purl.obolibrary.org/obo/OBA_2043875	GCST90239564
http://www.ebi.ac.uk/efo/EFO_0802506	GCST90240999,GCST90249108
http://www.ebi.ac.uk/efo/EFO_0009101	GCST007336,GCST006769,GCST006770,GCST003795,GCST006044,GCST006045,GCST90078957,GCST90082943,GCST90000048,GCST90000049,GCST90000050,GCST011757,GCST90133146,GCST90133122
http://purl.obolibrary.org/obo/OBA_2043876	GCST90238806
http://www.ebi.ac.uk/efo/EFO_0802507	GCST90241000,GCST90248942
http://www.ebi.ac.uk/efo/EFO_0009102	GCST003796,GCST006046,GCST006047,GCST90029038,GCST011757,GCST90133147,GCST90133123,GCST90271628,GCST90271629,GCST90271630,GCST90271631,GCST90271632,GCST90271633
http://purl.obolibrary.org/obo/OBA_2043877	GCST90233563
http://www.ebi.ac.uk/efo/EFO_0009103	GCST005797
http://www.ebi.ac.uk/efo/EFO_0802508	GCST90241001
http://www.ebi.ac.uk/efo/EFO_1001336	GCST90080430,GCST90084416,GCST90044578
http://www.ebi.ac.uk/efo/EFO_0010525	GCST90257458,GCST90258063
http://purl.obolibrary.org/obo/OBA_2043878	GCST90233732
http://www.ebi.ac.uk/efo/EFO_0802509	GCST90241002
http://www.ebi.ac.uk/efo/EFO_0009104	GCST90129647,GCST90129648,GCST007916,GCST005801,GCST005802,GCST008460
http://www.ebi.ac.uk/efo/EFO_0010526	GCST90257488,GCST90258093
http://purl.obolibrary.org/obo/OBA_2043879	GCST90233738
http://www.ebi.ac.uk/efo/EFO_0009105	GCST006054
http://www.ebi.ac.uk/efo/EFO_0010527	GCST90134136,GCST90265888,GCST90265889,GCST90243572,GCST90257709,GCST90258314,GCST90139636,GCST90245394,GCST90103161,GCST90202124,GCST90199701,GCST90203165,GCST90299769
http://www.ebi.ac.uk/efo/EFO_0010528	GCST90176073,GCST90279598
http://www.ebi.ac.uk/efo/EFO_0803370	GCST90255614
http://www.ebi.ac.uk/efo/EFO_0007870	GCST012158
http://www.ebi.ac.uk/efo/EFO_0803371	GCST90243953
http://www.ebi.ac.uk/efo/EFO_0803372	GCST90243954
http://www.ebi.ac.uk/efo/EFO_0007872	GCST003850,GCST003847,GCST003849,GCST003846,GCST003848,GCST003851,GCST90140932
http://www.ebi.ac.uk/efo/EFO_0803373	GCST90243955
http://www.ebi.ac.uk/efo/EFO_0007873	GCST003853
http://www.ebi.ac.uk/efo/EFO_0803374	GCST90255653,GCST90255654,GCST90255655,GCST90255656,GCST90255658
http://www.ebi.ac.uk/efo/EFO_0007874	GCST90027647,GCST90027648,GCST90027649,GCST90027650,GCST90027651,GCST90027652,GCST90027653,GCST90027654,GCST90027655,GCST90027656,GCST90027657,GCST90027658,GCST90027659,GCST90027660,GCST90027661,GCST90027662,GCST90027663,GCST90027664,GCST90027665,GCST90027666,GCST90027667,GCST90027668,GCST90027669,GCST90027670,GCST90027671,GCST90027572,GCST90027573,GCST90027574,GCST90027575,GCST90027576,GCST90027…
http://www.ebi.ac.uk/efo/EFO_0803375	GCST90255657
http://www.ebi.ac.uk/efo/EFO_0007875	GCST004699,GCST003979,GCST003982,GCST012956,GCST90081569,GCST90081568,GCST90077583,GCST90077582,GCST007984
http://www.ebi.ac.uk/efo/EFO_0803376	GCST90255659
http://www.ebi.ac.uk/efo/EFO_0007876	GCST001586,GCST003982,GCST003981,GCST002052,GCST007988,GCST007387,GCST007388,GCST90018649,GCST90018869
http://www.ebi.ac.uk/efo/EFO_0803377	GCST90269770,GCST90269771,GCST90269772
http://purl.obolibrary.org/obo/OBA_2042540	GCST90235434
http://www.ebi.ac.uk/efo/EFO_0007877	GCST004956,GCST004955,GCST003860,GCST007326
http://www.ebi.ac.uk/efo/EFO_0803378	GCST90255670,GCST90255671
http://purl.obolibrary.org/obo/OBA_2042541	GCST90235147
http://www.ebi.ac.uk/efo/EFO_0007878	GCST004886,GCST004887,GCST004405,GCST004404,GCST003873,GCST001082,GCST001731,GCST008675,GCST001753,GCST004579,GCST004026,GCST004027,GCST004990,GCST008805,GCST008811,GCST90319537,GCST90319891,GCST90319893,GCST90319895,GCST90319889,GCST90134526,GCST90043654,GCST90043655,GCST90032654,GCST90032655,GCST90032656,GCST012717,GCST90043656,GCST90043657,GCST90043658,GCST90042653,GCST90042654,GCST90042655,GC…
http://www.ebi.ac.uk/efo/EFO_0803379	GCST90257012
http://purl.obolibrary.org/obo/OBA_2042542	GCST90235572
http://www.ebi.ac.uk/efo/EFO_0007879	GCST003843
http://purl.obolibrary.org/obo/OBA_2042543	GCST90236095,GCST90236302
http://purl.obolibrary.org/obo/OBA_2042544	GCST90238603
http://purl.obolibrary.org/obo/OBA_2042545	GCST90239471
http://purl.obolibrary.org/obo/OBA_2042546	GCST90232925
http://purl.obolibrary.org/obo/OBA_2042547	GCST90238604
http://purl.obolibrary.org/obo/OBA_2042548	GCST90236349
http://purl.obolibrary.org/obo/OBA_2042549	GCST90236363
http://www.ebi.ac.uk/efo/EFO_1000014	GCST90083761,GCST90079775
http://www.ebi.ac.uk/efo/EFO_1000015	GCST90129618,GCST90129623
http://www.ebi.ac.uk/efo/EFO_0020580	GCST90241952,GCST90101328,GCST90237507,GCST90137852,GCST90161922,GCST90248409
http://www.ebi.ac.uk/efo/EFO_0020581	GCST90241953,GCST90101329,GCST90234460,GCST90236220,GCST90239450,GCST90162342,GCST90248410
http://www.ebi.ac.uk/efo/EFO_0020582	GCST90241955,GCST90101330,GCST90162353
http://www.ebi.ac.uk/efo/EFO_0020583	GCST90101331,GCST90237793,GCST90162241,GCST90225910
http://www.ebi.ac.uk/efo/EFO_1000018	GCST90038632,GCST90081700,GCST90081701,GCST90044245,GCST90077715,GCST90077714,GCST90084586,GCST90084587,GCST90084593,GCST90080600,GCST90080601,GCST90080605,GCST90080606,GCST90084591,GCST90084592,GCST90080607,GCST90018665,GCST90018885
http://www.ebi.ac.uk/efo/EFO_0020584	GCST90241971,GCST90101332,GCST90137736,GCST90237752,GCST90162191,GCST90248474
http://www.ebi.ac.uk/efo/EFO_0020585	GCST90241987,GCST90241988,GCST90101333,GCST90234050,GCST90237420,GCST90137652,GCST90161827,GCST90179398,GCST90248550
http://www.ebi.ac.uk/efo/EFO_0020586	GCST90242006,GCST90242007,GCST90101338,GCST90237445,GCST90137925,GCST90238882,GCST90161857,GCST90225641,GCST90248590
http://www.ebi.ac.uk/efo/EFO_0020587	GCST90101342,GCST90237520,GCST90161936,GCST90248572
http://www.ebi.ac.uk/efo/EFO_0020588	GCST90242032,GCST90242033,GCST90101343,GCST90137738,GCST90237846,GCST90238911,GCST90162297,GCST90248750
http://www.ebi.ac.uk/efo/EFO_0802050	GCST90242748,GCST90249490
http://www.ebi.ac.uk/efo/EFO_0020589	GCST90242034,GCST90101344,GCST90237067,GCST90161449
http://www.ebi.ac.uk/efo/EFO_0802051	GCST90242754,GCST90249497
http://www.ebi.ac.uk/efo/EFO_0802052	GCST90242755
http://www.ebi.ac.uk/efo/EFO_0802053	GCST90242758,GCST90249499
http://www.ebi.ac.uk/efo/EFO_0010070	GCST008312
http://www.ebi.ac.uk/efo/EFO_0802054	GCST90242763,GCST90249633
http://www.ebi.ac.uk/efo/EFO_0802055	GCST90242765,GCST90249636
http://www.ebi.ac.uk/efo/EFO_0010071	GCST90054799,GCST008309,GCST90095173,GCST90095175,GCST90095177,GCST90095181,GCST90012758,GCST90012777
http://www.ebi.ac.uk/efo/EFO_0802056	GCST90242769,GCST90249655
http://www.ebi.ac.uk/efo/EFO_0010072	GCST90079440,GCST90044345,GCST90083426,GCST008305
http://purl.obolibrary.org/obo/OBA_2041220	GCST90233663
http://www.ebi.ac.uk/efo/EFO_0010073	GCST011877,GCST008298,GCST90266934
http://www.ebi.ac.uk/efo/EFO_0802057	GCST90242771
http://purl.obolibrary.org/obo/OBA_2041221	GCST90233982
http://www.ebi.ac.uk/efo/EFO_0802058	GCST90242777,GCST90249707
http://www.ebi.ac.uk/efo/EFO_0010074	GCST008279
http://purl.obolibrary.org/obo/OBA_2041222	GCST90238133
http://www.ebi.ac.uk/efo/EFO_0802059	GCST90242780
http://www.ebi.ac.uk/efo/EFO_0010075	GCST008280
http://purl.obolibrary.org/obo/OBA_2041223	GCST90236466
http://www.ebi.ac.uk/efo/EFO_0010076	GCST008278
http://purl.obolibrary.org/obo/OBA_2041224	GCST90235942
http://www.ebi.ac.uk/efo/EFO_0010077	GCST008307
http://purl.obolibrary.org/obo/OBA_2041225	GCST90236251,GCST90238917
http://www.ebi.ac.uk/efo/EFO_0010078	GCST90079441,GCST90044346,GCST90083427,GCST008295,GCST008306
http://purl.obolibrary.org/obo/OBA_2041226	GCST90236481
http://www.ebi.ac.uk/efo/EFO_0010079	GCST008339,GCST008316,GCST008321
http://purl.obolibrary.org/obo/OBA_2041227	GCST90235098
http://purl.obolibrary.org/obo/OBA_2041228	GCST90235114
http://purl.obolibrary.org/obo/OBA_2041229	GCST90234094
http://purl.obolibrary.org/obo/OBA_2045110	GCST90277268,GCST90244400,GCST90244221
http://purl.obolibrary.org/obo/MONDO_0024355	GCST90038701
http://purl.obolibrary.org/obo/OBA_2045111	GCST90277318,GCST90244271,GCST90244450
http://purl.obolibrary.org/obo/OBA_2045112	GCST90277319,GCST90244272,GCST90244451
http://www.ebi.ac.uk/efo/EFO_0005220	GCST003787
http://purl.obolibrary.org/obo/OBA_2045113	GCST90277320,GCST90244273,GCST90244452
http://purl.obolibrary.org/obo/OBA_2042090	GCST90232897
http://www.ebi.ac.uk/efo/EFO_0005221	GCST005855,GCST005860,GCST90018583,GCST90018803
http://purl.obolibrary.org/obo/OBA_2050410	GCST90299524
http://purl.obolibrary.org/obo/OBA_2045114	GCST90277321,GCST90244274,GCST90244453
http://purl.obolibrary.org/obo/OBA_2042091	GCST90239087
http://purl.obolibrary.org/obo/OBA_2050411	GCST90299632
http://purl.obolibrary.org/obo/OBA_2045115	GCST90277322,GCST90244275,GCST90244454
http://purl.obolibrary.org/obo/OBA_2042092	GCST90232981
http://www.ebi.ac.uk/efo/EFO_0005223	GCST90086138,GCST90086139,GCST90086140,GCST90086141,GCST90086142
http://purl.obolibrary.org/obo/OBA_2050412	GCST90299805
http://purl.obolibrary.org/obo/OBA_2045116	GCST90277323,GCST90244276,GCST90244455
http://purl.obolibrary.org/obo/OBA_2042093	GCST90236379
http://purl.obolibrary.org/obo/OBA_2050413	GCST90299998
http://purl.obolibrary.org/obo/OBA_2045117	GCST90277324,GCST90244277,GCST90244456
http://purl.obolibrary.org/obo/OBA_2042094	GCST90235899
http://purl.obolibrary.org/obo/OBA_2050414	GCST90300025
http://purl.obolibrary.org/obo/OBA_2045118	GCST90277325,GCST90244278,GCST90244457
http://purl.obolibrary.org/obo/OBA_2042095	GCST90236754
http://purl.obolibrary.org/obo/OBA_2050415	GCST90300066
http://purl.obolibrary.org/obo/OBA_2045119	GCST90277326,GCST90244279,GCST90244458
http://purl.obolibrary.org/obo/OBA_2042096	GCST90233348
http://www.ebi.ac.uk/efo/EFO_0802510	GCST90241003,GCST90249337
http://purl.obolibrary.org/obo/OBA_2050416	GCST90300194
http://purl.obolibrary.org/obo/OBA_2042097	GCST90239531
http://purl.obolibrary.org/obo/OBA_2043880	GCST90236408
http://www.ebi.ac.uk/efo/EFO_0802511	GCST90241006,GCST90249341
http://purl.obolibrary.org/obo/OBA_2050417	GCST90300263
http://purl.obolibrary.org/obo/OBA_2043881	GCST90238559
http://purl.obolibrary.org/obo/OBA_2042098	GCST90233656
http://www.ebi.ac.uk/efo/EFO_0802512	GCST90241007,GCST90249350
http://www.ebi.ac.uk/efo/EFO_0005229	GCST002522,GCST008910,GCST007479
http://purl.obolibrary.org/obo/OBA_2043882	GCST90233019
http://purl.obolibrary.org/obo/OBA_2042099	GCST90234098
http://www.ebi.ac.uk/efo/EFO_0802513	GCST90241010
http://purl.obolibrary.org/obo/OBA_2043883	GCST90238331
http://www.ebi.ac.uk/efo/EFO_0802514	GCST90241013,GCST90247395
http://purl.obolibrary.org/obo/OBA_2043884	GCST90238757
http://www.ebi.ac.uk/efo/EFO_0010531	GCST90134147,GCST90265918,GCST90265919,GCST90139559,GCST90245406,GCST90200345,GCST90201759,GCST90202790,GCST90300219
http://www.ebi.ac.uk/efo/EFO_0802515	GCST90241014
http://www.ebi.ac.uk/efo/EFO_0010532	GCST90264365,GCST90264366,GCST90257463,GCST90243504,GCST90258068,GCST90140924,GCST90244993,GCST90102777,GCST90201732,GCST90200347,GCST90203783,GCST90202779,GCST90299657
http://purl.obolibrary.org/obo/OBA_2043885	GCST90233143
http://www.ebi.ac.uk/efo/EFO_0802516	GCST90241018,GCST90247461
http://www.ebi.ac.uk/efo/EFO_0010533	GCST90265477,GCST90265478,GCST90257465,GCST90258070,GCST90267522,GCST90139615,GCST90103047,GCST90245287,GCST90202253,GCST90203287,GCST90199818,GCST90300227
http://purl.obolibrary.org/obo/OBA_2043886	GCST90236883
http://www.ebi.ac.uk/efo/EFO_0802517	GCST90241025,GCST90247469
http://www.ebi.ac.uk/efo/EFO_1001345	GCST004784
http://purl.obolibrary.org/obo/OBA_2043887	GCST90236246
http://www.ebi.ac.uk/efo/EFO_0010534	GCST90129200
http://www.ebi.ac.uk/efo/EFO_0802518	GCST90241028,GCST90247398
http://www.ebi.ac.uk/efo/EFO_0009113	GCST005653,GCST90079069,GCST90043794,GCST009542,GCST90078436,GCST90078433,GCST90078434,GCST90078432,GCST90078435,GCST90078401,GCST90078427,GCST90078426,GCST90078428,GCST90078429,GCST90078430,GCST90078397,GCST90078398,GCST90078399,GCST90078400,GCST90079792,GCST90078305,GCST90078303,GCST90078304,GCST90082413,GCST90082412,GCST90082414,GCST90082415,GCST90082416,GCST90082387,GCST90082383,GCST90082384,…
http://purl.obolibrary.org/obo/OBA_2043888	GCST90234127
http://www.ebi.ac.uk/efo/EFO_0010535	GCST90134198,GCST90013576,GCST90266001,GCST90266002,GCST90257469,GCST90258074,GCST90245440,GCST90200449,GCST90201864,GCST90202888,GCST90203873,GCST90300477
http://www.ebi.ac.uk/efo/EFO_0802519	GCST90241030,GCST90247414
http://purl.obolibrary.org/obo/OBA_2043889	GCST90233544
http://www.ebi.ac.uk/efo/EFO_0010536	GCST90026035,GCST90102483,GCST90134202,GCST90010752,GCST90013577,GCST90176076,GCST90178697,GCST90176111,GCST90266031,GCST90266032,GCST90134383,GCST90258238,GCST90257633,GCST90267528,GCST90139591,GCST90245444,GCST90103206,GCST90201807,GCST90200420,GCST90203836,GCST90300246
http://www.ebi.ac.uk/efo/EFO_0009115	GCST005654,GCST008808,GCST008803,GCST009544,GCST90103789,GCST90297549
http://www.ebi.ac.uk/efo/EFO_0010537	GCST90134204,GCST90176078,GCST90266035,GCST90243516,GCST90140198,GCST90245446,GCST90103207,GCST90201730,GCST90200337,GCST90203774,GCST90202783,GCST90299794
http://www.ebi.ac.uk/efo/EFO_0009116	GCST005652,GCST90083453,GCST90083454,GCST90083455,GCST90083456,GCST90083457,GCST90083451,GCST90083452,GCST90041769,GCST90042585,GCST90042586,GCST90042587,GCST90042588,GCST90042590,GCST90042591,GCST90042592,GCST90042593,GCST90042594,GCST90042595,GCST90042596,GCST90042597,GCST90042598,GCST90042599,GCST90042600,GCST90042601,GCST90042602,GCST90042603,GCST90042604,GCST90042605,GCST90044378,GCST9004437…
http://www.ebi.ac.uk/efo/EFO_0010538	GCST90134205,GCST90176077,GCST90266038,GCST90266039,GCST90257472,GCST90243517,GCST90258077,GCST90140199,GCST90245447,GCST90103208,GCST90201737,GCST90200333,GCST90203777,GCST90202777,GCST90299795
http://www.ebi.ac.uk/efo/EFO_0009117	GCST90044060
http://www.ebi.ac.uk/efo/EFO_0010539	GCST90134207,GCST90176078,GCST90266043,GCST90257473,GCST90243471,GCST90258078,GCST90140200,GCST90245449,GCST90201736,GCST90200334,GCST90203773,GCST90202773,GCST90299797
http://www.ebi.ac.uk/efo/EFO_0803380	GCST90239748,GCST90239749,GCST90255651
http://www.ebi.ac.uk/efo/EFO_0007880	GCST003852
http://www.ebi.ac.uk/efo/EFO_0803381	GCST90269832
http://www.ebi.ac.uk/efo/EFO_0007881	GCST003868
http://www.ebi.ac.uk/efo/EFO_0803382	GCST90244151,GCST90244152,GCST90244153,GCST90244154,GCST90244155,GCST90244156
http://www.ebi.ac.uk/efo/EFO_0803383	GCST90279978
http://www.ebi.ac.uk/efo/EFO_0007883	GCST003875
http://purl.obolibrary.org/obo/HP_0001760	GCST008541,GCST90080431,GCST90084417,GCST90044582,GCST90044610
http://www.ebi.ac.uk/efo/EFO_0803384	GCST90300278
http://www.ebi.ac.uk/efo/EFO_0803385	GCST90280452
http://www.ebi.ac.uk/efo/EFO_0007885	GCST004032,GCST010918,GCST90179157,GCST90179158,GCST90179159,GCST90179160,GCST90179167,GCST90179168,GCST90179173,GCST90179174
http://www.ebi.ac.uk/efo/EFO_0007886	GCST003923,GCST012233,GCST90165228,GCST90165229,GCST90165230
http://purl.obolibrary.org/obo/OBA_2042550	GCST90235496
http://www.ebi.ac.uk/efo/EFO_0007887	GCST003992,GCST007687,GCST005809
http://www.ebi.ac.uk/efo/EFO_0803388	GCST90281010
http://purl.obolibrary.org/obo/OBA_2042551	GCST90235722
http://www.ebi.ac.uk/efo/EFO_0007888	GCST90078942,GCST90078943,GCST90078941,GCST90082929,GCST90082927,GCST90082928,GCST003994
http://www.ebi.ac.uk/efo/EFO_0803389	GCST90280514
http://purl.obolibrary.org/obo/OBA_2042552	GCST90233739
http://www.ebi.ac.uk/efo/EFO_0007889	GCST003927,GCST006656,GCST006636
http://purl.obolibrary.org/obo/OBA_2042553	GCST90239532
http://purl.obolibrary.org/obo/OBA_2042554	GCST90232835
http://purl.obolibrary.org/obo/OBA_2042555	GCST90235727
http://purl.obolibrary.org/obo/OBA_2042556	GCST90233633
http://purl.obolibrary.org/obo/OBA_2042557	GCST90238328
http://purl.obolibrary.org/obo/OBA_2042558	GCST90238140
http://www.ebi.ac.uk/efo/EFO_1001800	GCST90044552
http://purl.obolibrary.org/obo/OBA_2042559	GCST90239249
http://www.ebi.ac.uk/efo/EFO_1000023	GCST90044233,GCST90080596,GCST90084582
http://www.ebi.ac.uk/efo/EFO_1000024	GCST007444,GCST012015,GCST90018603,GCST90018823,GCST90269778,GCST90269789
http://www.ebi.ac.uk/efo/EFO_0020590	GCST90088952,GCST90242044,GCST90101346,GCST90237868,GCST90162322,GCST90248759
http://www.ebi.ac.uk/efo/EFO_1000025	GCST90081900,GCST90081901,GCST90044232,GCST90044235,GCST90077915,GCST90077914,GCST90080598,GCST90080597,GCST90084585,GCST90084583,GCST90084584,GCST90080599,GCST90013953,GCST90013903,GCST90018611,GCST90018831,GCST90129435,GCST90246186
http://www.ebi.ac.uk/efo/EFO_0020591	GCST90088953,GCST90090241,GCST90242045,GCST90242046,GCST90101347,GCST90234518,GCST90237869,GCST90238983,GCST90162323,GCST90248760
http://www.ebi.ac.uk/efo/EFO_0020592	GCST90242049,GCST90101348,GCST90237319,GCST90137863,GCST90161719,GCST90225699,GCST90248644
http://www.ebi.ac.uk/efo/EFO_0020593	GCST90242054,GCST90101349,GCST90237667,GCST90137646,GCST90162101,GCST90248611
http://www.ebi.ac.uk/efo/EFO_0020594	GCST90242056,GCST90101350,GCST90162025,GCST90248613
http://www.ebi.ac.uk/efo/EFO_0020595	GCST90242057,GCST90101351,GCST90237439,GCST90239119,GCST90161848,GCST90248617
http://www.ebi.ac.uk/efo/EFO_0020596	GCST90242064,GCST90101352,GCST90236132,GCST90237851,GCST90162303,GCST90248735
http://www.ebi.ac.uk/efo/EFO_0020597	GCST90242066,GCST90242067,GCST90242068,GCST90101353,GCST90237852,GCST90162304,GCST90248738
http://www.ebi.ac.uk/efo/EFO_0020598	GCST90242072,GCST90101355,GCST90237156,GCST90161547
http://www.ebi.ac.uk/efo/EFO_0802060	GCST90242790
http://www.ebi.ac.uk/efo/EFO_0802061	GCST90242792,GCST90249609
http://www.ebi.ac.uk/efo/EFO_0020599	GCST90086671,GCST90088928,GCST90090191,GCST90101357,GCST90233179,GCST90238941,GCST90162299,GCST90248711
http://www.ebi.ac.uk/efo/EFO_0802062	GCST90242793,GCST90249611
http://www.ebi.ac.uk/efo/EFO_0802063	GCST90242799,GCST90249528
http://www.ebi.ac.uk/efo/EFO_0010080	GCST008356
http://www.ebi.ac.uk/efo/EFO_0802064	GCST90242805
http://www.ebi.ac.uk/efo/EFO_0802065	GCST90242806,GCST90249545
http://www.ebi.ac.uk/efo/EFO_0802066	GCST90242807,GCST90242808,GCST90249546
http://purl.obolibrary.org/obo/OBA_2041230	GCST90236563
http://www.ebi.ac.uk/efo/EFO_0802067	GCST90242812,GCST90249552
http://www.ebi.ac.uk/efo/EFO_0010083	GCST008557,GCST008558,GCST90267923,GCST90267924,GCST90267901,GCST90267902,GCST90267945,GCST90267946,GCST90267967,GCST90267968
http://purl.obolibrary.org/obo/OBA_2041231	GCST90233610
http://www.ebi.ac.uk/efo/EFO_0010084	GCST008498
http://purl.obolibrary.org/obo/MONDO_0020476	GCST002170
http://www.ebi.ac.uk/efo/EFO_0802068	GCST90242814
http://purl.obolibrary.org/obo/OBA_2041232	GCST90233433
http://www.ebi.ac.uk/efo/EFO_0010085	GCST008500
http://www.ebi.ac.uk/efo/EFO_0802069	GCST90242820,GCST90249559
http://purl.obolibrary.org/obo/OBA_2041233	GCST90236921
http://www.ebi.ac.uk/efo/EFO_0010086	GCST008501
http://purl.obolibrary.org/obo/OBA_2041234	GCST90236382
http://www.ebi.ac.uk/efo/EFO_0010087	GCST008499
http://www.ebi.ac.uk/efo/EFO_0010088	GCST90096899,GCST90096910,GCST90096928,GCST90096929,GCST90096916,GCST90132985,GCST90133002
http://purl.obolibrary.org/obo/OBA_2041235	GCST90234617
http://purl.obolibrary.org/obo/OBA_2041236	GCST90236500
http://www.ebi.ac.uk/efo/EFO_0010089	GCST008521
http://purl.obolibrary.org/obo/OBA_2041237	GCST90235809
http://purl.obolibrary.org/obo/OBA_2041238	GCST90235239
http://purl.obolibrary.org/obo/OBA_2041239	GCST90239486
http://purl.obolibrary.org/obo/OBA_2045120	GCST90277327,GCST90244280,GCST90244459
http://purl.obolibrary.org/obo/OBA_2045121	GCST90277328,GCST90244281,GCST90244460
http://purl.obolibrary.org/obo/OBA_2045122	GCST90277329,GCST90244282,GCST90244461
http://www.ebi.ac.uk/efo/EFO_0005230	GCST002202,GCST002200,GCST001948,GCST90085908,GCST90085909,GCST90085910,GCST90085914,GCST90085915,GCST90085916,GCST90038651,GCST90078445,GCST90081610,GCST90041879,GCST90042778,GCST90042840,GCST90042841,GCST90042842,GCST90042843,GCST90042844,GCST90078826,GCST90082431,GCST90077624,GCST90082812,GCST90302856,GCST012450,GCST012449,GCST012448,GCST012447,GCST90085696,GCST90085697,GCST90102281,GCST902672…
http://purl.obolibrary.org/obo/OBA_2045123	GCST90277330,GCST90244283,GCST90244462
http://purl.obolibrary.org/obo/OBA_2045124	GCST90277332,GCST90244285,GCST90244464
http://www.ebi.ac.uk/efo/EFO_0001357	GCST004901,GCST008472,GCST000482,GCST003632,GCST002283,GCST002337
http://purl.obolibrary.org/obo/OBA_2045125	GCST90277334,GCST90244287,GCST90244466
http://www.ebi.ac.uk/efo/EFO_0001358	GCST002038,GCST002037,GCST003495,GCST002401,GCST002171,GCST001630,GCST002681,GCST002914,GCST002963,GCST90020063,GCST009977,GCST007651,GCST007776,GCST90308728,GCST011459,GCST90103929,GCST90103931,GCST009315,GCST011300,GCST90095185,GCST90095187,GCST90271773,GCST90271774,GCST90271775,GCST90271776,GCST90297545,GCST90271326,GCST90271332,GCST90271338
http://purl.obolibrary.org/obo/OBA_2045126	GCST90277335,GCST90244288,GCST90244467
http://purl.obolibrary.org/obo/OBA_2045127	GCST90277336,GCST90244289,GCST90244468
http://purl.obolibrary.org/obo/OBA_2045128	GCST90277337,GCST90244290,GCST90244469
http://purl.obolibrary.org/obo/OBA_2045129	GCST90277338,GCST90244291,GCST90244470
http://www.ebi.ac.uk/efo/EFO_0802520	GCST90241033,GCST90247503
http://purl.obolibrary.org/obo/OBA_2043890	GCST90235654
http://www.ebi.ac.uk/efo/EFO_0802521	GCST90241035
http://purl.obolibrary.org/obo/OBA_2043891	GCST90239535
http://www.ebi.ac.uk/efo/EFO_0802522	GCST90241058,GCST90247441
http://www.ebi.ac.uk/efo/EFO_0005239	GCST005785,GCST001865,GCST009870,GCST90271563,GCST90271564,GCST90271565,GCST90271566
http://purl.obolibrary.org/obo/OBA_2043892	GCST90238349
http://www.ebi.ac.uk/efo/EFO_0802523	GCST90241059,GCST90247392
http://www.ebi.ac.uk/efo/EFO_1001351	GCST90080385,GCST90084371
http://www.ebi.ac.uk/efo/EFO_0010540	GCST90178698,GCST90266065,GCST90258253,GCST90257648,GCST90300747
http://purl.obolibrary.org/obo/OBA_2043893	GCST90237905
http://www.ebi.ac.uk/efo/EFO_0802524	GCST90241062
http://purl.obolibrary.org/obo/OBA_2043894	GCST90239474
http://www.ebi.ac.uk/efo/EFO_0010541	GCST90178702,GCST90266097,GCST90266098,GCST90139885,GCST90245464,GCST90103225,GCST90202361,GCST90201333,GCST90199920,GCST90203363
http://www.ebi.ac.uk/efo/EFO_0802525	GCST90241064
http://purl.obolibrary.org/obo/OBA_2043895	GCST90239542
http://www.ebi.ac.uk/efo/EFO_0802526	GCST90241084,GCST90241085,GCST90247403
http://www.ebi.ac.uk/efo/EFO_1001354	GCST012212
http://purl.obolibrary.org/obo/OBA_2043896	GCST90238043
http://www.ebi.ac.uk/efo/EFO_0802527	GCST90241093,GCST90247507
http://purl.obolibrary.org/obo/OBA_2043897	GCST90234099
http://www.ebi.ac.uk/efo/EFO_0802528	GCST90241095,GCST90247506
http://www.ebi.ac.uk/efo/EFO_0010545	GCST90257477,GCST90258082,GCST90267531,GCST90267532
http://purl.obolibrary.org/obo/OBA_2043898	GCST90236957
http://www.ebi.ac.uk/efo/EFO_0802529	GCST90241108,GCST90247501
http://www.ebi.ac.uk/efo/EFO_0009124	GCST90085379,GCST90085380,GCST90085381,GCST90081393,GCST90081394,GCST90081395
http://purl.obolibrary.org/obo/OBA_2043899	GCST90234005
http://www.ebi.ac.uk/efo/EFO_0010546	GCST90026036,GCST008894,GCST90134233,GCST90129209,GCST90176082,GCST90266122,GCST90266123,GCST90257481,GCST90243416,GCST90258086,GCST90140268,GCST90245473,GCST90103233,GCST90201812,GCST90200407,GCST90203846,GCST90202856,GCST90299817
http://www.ebi.ac.uk/efo/EFO_0010547	GCST90134234,GCST90266127,GCST90243447,GCST90140179,GCST90245474,GCST90103234,GCST90201713,GCST90202733,GCST90200297,GCST90203743,GCST90299819
http://www.ebi.ac.uk/efo/EFO_0010548	GCST90026037,GCST008868,GCST90176083,GCST90178713,GCST90266864,GCST90266865,GCST90257482,GCST90243465,GCST90257561,GCST90258166,GCST90258087,GCST90140252,GCST90134460,GCST90245759,GCST90103346,GCST90201687,GCST90200285,GCST90203717,GCST90202721,GCST90299894
http://www.ebi.ac.uk/efo/EFO_0010549	GCST90134243,GCST90176084,GCST90266867,GCST90258266,GCST90257661,GCST90140235,GCST90300269
http://www.ebi.ac.uk/efo/EFO_0803390	GCST90279347
http://www.ebi.ac.uk/efo/EFO_0007890	GCST001522,GCST003968,GCST003971,GCST006543,GCST006544,GCST006545,GCST006546
http://www.ebi.ac.uk/efo/EFO_0803391	GCST90278962
http://www.ebi.ac.uk/efo/EFO_0007891	GCST003940
http://www.ebi.ac.uk/efo/EFO_0007892	GCST003942,GCST005429,GCST005430,GCST005432,GCST005433,GCST90092525,GCST90092519,GCST90092522,GCST010683,GCST010682,GCST007644,GCST007648,GCST007646,GCST90102555,GCST90102561,GCST90102567,GCST90102556,GCST90102562,GCST90102568,GCST90102557,GCST90102563,GCST90102569,GCST90102558,GCST90102564,GCST90102570,GCST90102559,GCST90102565,GCST90102571,GCST90102560,GCST90102566,GCST90102572
http://www.ebi.ac.uk/efo/EFO_0803393	GCST90280026
http://www.ebi.ac.uk/efo/EFO_0007893	GCST003938
http://www.ebi.ac.uk/efo/EFO_0803394	GCST90280756,GCST90245087
http://www.ebi.ac.uk/efo/EFO_0007894	GCST003931
http://purl.obolibrary.org/obo/MONDO_0005129	GCST90038649,GCST90079349,GCST90079348,GCST90079347,GCST90081742,GCST90081743,GCST90079433,GCST90083335,GCST90083334,GCST90083333,GCST90043785,GCST90044144,GCST90044145,GCST90044146,GCST90044337,GCST009963,GCST90077757,GCST90077756,GCST90083419,GCST90079890,GCST90079891,GCST90079893,GCST90083879,GCST90083876,GCST90083877,GCST90083878,GCST90079892,GCST90104236,GCST001736,GCST90014268,GCST012012,GC…
http://www.ebi.ac.uk/efo/EFO_0803395	GCST90301051
http://www.ebi.ac.uk/efo/EFO_0007895	GCST003932
http://www.ebi.ac.uk/efo/EFO_0803396	GCST90278792
http://www.ebi.ac.uk/efo/EFO_0007896	GCST003933
http://www.ebi.ac.uk/efo/EFO_0803397	GCST90278949
http://purl.obolibrary.org/obo/OBA_2042560	GCST90239085
http://www.ebi.ac.uk/efo/EFO_0007897	GCST003934,GCST90264852,GCST90139646,GCST90201249,GCST90203310,GCST90202294,GCST90199837
http://www.ebi.ac.uk/efo/EFO_0803398	GCST90280337
http://purl.obolibrary.org/obo/OBA_2042561	GCST90234246
http://www.ebi.ac.uk/efo/EFO_0007898	GCST90133764,GCST003935,GCST90264793,GCST90243441,GCST90139664,GCST90245109,GCST90102871,GCST90201690,GCST90200302,GCST90203734,GCST90202742,GCST90299533
http://www.ebi.ac.uk/efo/EFO_0803399	GCST90278862
http://purl.obolibrary.org/obo/OBA_2042562	GCST90234304,GCST90238006
http://www.ebi.ac.uk/efo/EFO_0007899	GCST003936,GCST90243688,GCST90139655,GCST90245213,GCST90102977,GCST90299612
http://purl.obolibrary.org/obo/OBA_2042563	GCST90232915
http://purl.obolibrary.org/obo/OBA_2042564	GCST90238137,GCST90234364
http://purl.obolibrary.org/obo/OBA_2042565	GCST90233978
http://purl.obolibrary.org/obo/OBA_2042566	GCST90236304
http://purl.obolibrary.org/obo/OBA_2042567	GCST90236991
http://purl.obolibrary.org/obo/OBA_2042568	GCST90238521
http://purl.obolibrary.org/obo/OBA_2042569	GCST90233297
http://www.ebi.ac.uk/efo/EFO_0002686	GCST006040,GCST000540,GCST000870,GCST001075,GCST90081463,GCST90085449,GCST90258649,GCST90258648
http://www.ebi.ac.uk/efo/EFO_0002689	GCST004227
http://www.orpha.net/ORDO/Orphanet_1945	GCST010566
http://www.ebi.ac.uk/efo/EFO_0802070	GCST90242821
http://www.ebi.ac.uk/efo/EFO_0802071	GCST90242822,GCST90249560
http://www.ebi.ac.uk/efo/EFO_0802072	GCST90242826,GCST90249554
http://www.ebi.ac.uk/efo/EFO_0802073	GCST90242828
http://www.ebi.ac.uk/efo/EFO_0010090	GCST008528
http://www.ebi.ac.uk/efo/EFO_0802074	GCST90242836,GCST90249567
http://www.ebi.ac.uk/efo/EFO_0802075	GCST90242843,GCST90249557
http://www.ebi.ac.uk/efo/EFO_0010091	GCST90081544,GCST90081573,GCST90041729,GCST009802,GCST012044,GCST90077587,GCST90077558,GCST008529,GCST011124,GCST011126,GCST90096926,GCST90132983
http://www.ebi.ac.uk/efo/EFO_0010092	GCST008522
http://www.ebi.ac.uk/efo/EFO_0802076	GCST90242850,GCST90249453
http://purl.obolibrary.org/obo/OBA_2041240	GCST90234632
http://www.ebi.ac.uk/efo/EFO_0010093	GCST008524
http://www.ebi.ac.uk/efo/EFO_0802077	GCST90242853
http://purl.obolibrary.org/obo/OBA_2041241	GCST90238652
http://www.ebi.ac.uk/efo/EFO_0010094	GCST008531
http://www.ebi.ac.uk/efo/EFO_0802078	GCST90242854,GCST90249615
http://purl.obolibrary.org/obo/OBA_2041242	GCST90234126
http://www.ebi.ac.uk/efo/EFO_0010095	GCST008523
http://www.ebi.ac.uk/efo/EFO_0802079	GCST90242856,GCST90249412
http://purl.obolibrary.org/obo/OBA_2041243	GCST90235342
http://www.ebi.ac.uk/efo/EFO_0010096	GCST008525
http://purl.obolibrary.org/obo/OBA_2041244	GCST90235709
http://www.ebi.ac.uk/efo/EFO_0010097	GCST008527
http://purl.obolibrary.org/obo/OBA_2041245	GCST90234776
http://www.ebi.ac.uk/efo/EFO_0010098	GCST90044458,GCST008559,GCST008567,GCST008565,GCST008564,GCST008563,GCST008562,GCST008561,GCST008560,GCST90085696,GCST90085697,GCST90134643
http://purl.obolibrary.org/obo/OBA_2041246	GCST90234680
http://www.ebi.ac.uk/efo/EFO_0010099	GCST90025872,GCST008511,GCST011779,GCST90129441
http://purl.obolibrary.org/obo/OBA_2041247	GCST90235262
http://purl.obolibrary.org/obo/OBA_2041248	GCST90233947
http://purl.obolibrary.org/obo/OBA_2041249	GCST90239011
http://www.ebi.ac.uk/efo/EFO_0001361	GCST001908,GCST004947,GCST007228,GCST90270938
http://purl.obolibrary.org/obo/OBA_2045130	GCST90277339,GCST90244292,GCST90244471
http://purl.obolibrary.org/obo/OBA_2045131	GCST90277340,GCST90244293,GCST90244472
http://purl.obolibrary.org/obo/OBA_2045132	GCST90277341,GCST90244294,GCST90244473
http://www.ebi.ac.uk/efo/EFO_0005240	GCST001966,GCST009961
http://www.ebi.ac.uk/efo/EFO_0001365	GCST005359,GCST004737,GCST001814,GCST000001,GCST001986,GCST001990,GCST001987,GCST000653,GCST000921,GCST000006,GCST001884,GCST000806,GCST001899,GCST001571,GCST001100,GCST000652,GCST003219,GCST004868,GCST004869,GCST004870,GCST004871,GCST004872,GCST90134545,GCST90086108,GCST90086109,GCST90086110,GCST90086111,GCST90086112,GCST90043776,GCST011376,GCST009776,GCST90013851,GCST90013854,GCST001232,GCST010…
http://purl.obolibrary.org/obo/OBA_2045133	GCST90277342,GCST90244295,GCST90244474
http://www.ebi.ac.uk/efo/EFO_0005241	GCST001952,GCST90043590,GCST90043591,GCST90043592,GCST90043593,GCST90043594,GCST90043595,GCST90043596,GCST90043597,GCST90043598,GCST90043599,GCST90043600,GCST90043601,GCST90043602,GCST90043603,GCST90043604,GCST90043605,GCST90043606,GCST90043607,GCST90043561,GCST90043562,GCST90043563,GCST90043564,GCST90043565,GCST90043566,GCST90043567,GCST90043568,GCST90043569,GCST90043570,GCST90043571,GCST9004357…
http://purl.obolibrary.org/obo/OBA_2045134	GCST90277343,GCST90244296,GCST90244475
http://www.ebi.ac.uk/efo/EFO_0005242	GCST001975
http://purl.obolibrary.org/obo/OBA_2045135	GCST90277344,GCST90244297,GCST90244476
http://www.ebi.ac.uk/efo/EFO_0005243	GCST001979,GCST001980,GCST90012031,GCST90241991,GCST90101335,GCST90236970,GCST90161379,GCST90179367,GCST90248549,GCST90274907
http://purl.obolibrary.org/obo/OBA_2045136	GCST90277345,GCST90244298,GCST90244477
http://purl.obolibrary.org/obo/OBA_2045137	GCST90277346,GCST90244299,GCST90244478
http://www.ebi.ac.uk/efo/EFO_0005245	GCST001985,GCST001991,GCST90044906,GCST90044907,GCST90084880,GCST90080894
http://purl.obolibrary.org/obo/OBA_2045138	GCST90277269,GCST90244401,GCST90244222
http://www.ebi.ac.uk/efo/EFO_0005246	GCST001971,GCST003016,GCST007191
http://purl.obolibrary.org/obo/OBA_2045139	GCST90277347,GCST90244300,GCST90244479
http://www.ebi.ac.uk/efo/EFO_0802530	GCST90241109
http://www.ebi.ac.uk/efo/EFO_0005247	GCST002014,GCST006363
http://www.ebi.ac.uk/efo/EFO_0802531	GCST90241111
http://purl.obolibrary.org/obo/HP_0040187	GCST004230
http://www.ebi.ac.uk/efo/EFO_0802532	GCST90241114
http://www.ebi.ac.uk/efo/EFO_0802533	GCST90241117
http://www.ebi.ac.uk/efo/EFO_0802534	GCST90241118,GCST90247438
http://www.ebi.ac.uk/efo/EFO_1001362	GCST90044061
http://www.ebi.ac.uk/efo/EFO_0010551	GCST90134244,GCST90176085,GCST90266868,GCST90266869,GCST90257483,GCST90258088,GCST90139390,GCST90245760,GCST90103347,GCST90202071,GCST90199626,GCST90201028,GCST90203113,GCST90300270
http://www.ebi.ac.uk/efo/EFO_0802535	GCST90241123,GCST90247429
http://www.ebi.ac.uk/efo/EFO_0009130	GCST005686,GCST012277,GCST012276,GCST90079537,GCST90083523,GCST010380
http://www.ebi.ac.uk/efo/EFO_0802536	GCST90241129
http://www.ebi.ac.uk/efo/EFO_0009131	GCST005668,GCST005669,GCST009642
http://www.ebi.ac.uk/efo/EFO_0010552	GCST90041823,GCST90041842,GCST90042710,GCST90042711,GCST90042712,GCST90042713,GCST90042714,GCST90042715,GCST90042716,GCST90042717,GCST90044307,GCST90044308,GCST90044309,GCST90044310,GCST90044311,GCST90044312,GCST90044313,GCST009386,GCST009387,GCST009389,GCST009390
http://www.ebi.ac.uk/efo/EFO_0010553	GCST009384
http://purl.obolibrary.org/obo/OBA_2041700	GCST90233926
http://www.ebi.ac.uk/efo/EFO_0009132	GCST007114,GCST007115,GCST007116,GCST007117,GCST005671,GCST90104624,GCST90104625
http://www.ebi.ac.uk/efo/EFO_0802537	GCST90241135,GCST90247559
http://purl.obolibrary.org/obo/OBA_2041701	GCST90233709
http://www.ebi.ac.uk/efo/EFO_0802538	GCST90241136,GCST90241137,GCST90241138,GCST90247560
http://www.ebi.ac.uk/efo/EFO_0010554	GCST90095200,GCST90095201,GCST009420,GCST009421,GCST009422,GCST009423,GCST009424,GCST009425,GCST009426,GCST009474,GCST009475,GCST90270397,GCST90270398,GCST90270399,GCST90270400,GCST90239688,GCST90239689,GCST90239690,GCST90293087,GCST90293088
http://www.ebi.ac.uk/efo/EFO_0009133	GCST90089679,GCST90089680,GCST005672,GCST90238495
http://purl.obolibrary.org/obo/OBA_2041702	GCST90235786
http://www.ebi.ac.uk/efo/EFO_0802539	GCST90241139
http://purl.obolibrary.org/obo/HP_0003011	GCST90084822,GCST90080836
http://www.ebi.ac.uk/efo/EFO_0009134	GCST005670,GCST90301168
http://www.ebi.ac.uk/efo/EFO_0010555	GCST009392,GCST010129,GCST010126,GCST90268130,GCST90268139
http://purl.obolibrary.org/obo/OBA_2041703	GCST90236037
http://www.ebi.ac.uk/efo/EFO_1001368	GCST90084161,GCST90080175
http://www.ebi.ac.uk/efo/EFO_0010556	GCST009393,GCST011208,GCST011213,GCST90268131,GCST90268140
http://purl.obolibrary.org/obo/OBA_2041704	GCST90234353
http://www.ebi.ac.uk/efo/EFO_0010557	GCST009418
http://purl.obolibrary.org/obo/OBA_2041705	GCST90235577
http://purl.obolibrary.org/obo/OBA_2041706	GCST90236496
http://purl.obolibrary.org/obo/HP_0031456	GCST90044475,GCST90018617,GCST90018837,GCST90245822,GCST90272883
http://www.ebi.ac.uk/efo/EFO_0010559	GCST005710,GCST005706,GCST005707,GCST005708,GCST005709,GCST90093327,GCST90093328,GCST90093329,GCST90093331,GCST90093332,GCST90093333,GCST90093334,GCST90093336,GCST90093337,GCST90093338,GCST90093341,GCST90093342,GCST90093343,GCST90093344,GCST90093345,GCST90093347,GCST90093348,GCST90093349,GCST90093350,GCST90093351,GCST90093330,GCST90093335,GCST90093339,GCST90093340,GCST90093346,GCST90093352,GCST90…
http://purl.obolibrary.org/obo/OBA_2041707	GCST90233971
http://purl.obolibrary.org/obo/OBA_2041708	GCST90233353
http://purl.obolibrary.org/obo/OBA_2041709	GCST90235910
http://purl.obolibrary.org/obo/GO_0033273	GCST001450,GCST007366
http://purl.obolibrary.org/obo/GO_1902518	GCST002002,GCST002176,GCST002178,GCST003445
http://www.ebi.ac.uk/efo/EFO_0801200	GCST90301176
http://purl.obolibrary.org/obo/GO_1902519	GCST003627,GCST003672,GCST001995,GCST002180,GCST90044859,GCST011316
http://www.ebi.ac.uk/efo/EFO_0801201	GCST90301179
http://purl.obolibrary.org/obo/OBA_2042570	GCST90233091
http://www.ebi.ac.uk/efo/EFO_0801202	GCST90176316,GCST90257252,GCST90257857,GCST90300971
http://purl.obolibrary.org/obo/OBA_2042571	GCST90236097
http://www.ebi.ac.uk/efo/EFO_0801203	GCST90176317,GCST90257251,GCST90257856,GCST90300867,GCST90300972
http://purl.obolibrary.org/obo/OBA_2042572	GCST90236952
http://purl.obolibrary.org/obo/OBA_2042573	GCST90235101
http://www.ebi.ac.uk/efo/EFO_0801204	GCST90176318,GCST90257261,GCST90257866,GCST90300979
http://purl.obolibrary.org/obo/HP_0001787	GCST90084725,GCST90080731,GCST90080727,GCST90080728,GCST90080739,GCST90080738,GCST90080729,GCST90080730,GCST90080732,GCST90084724,GCST90084717,GCST90084713,GCST90084714,GCST90084715,GCST90084716,GCST90084718,GCST90044488,GCST90245834
http://purl.obolibrary.org/obo/OBA_2042574	GCST90238618
http://www.ebi.ac.uk/efo/EFO_0801205	GCST90176319,GCST90257260,GCST90257865,GCST90300980
http://www.ebi.ac.uk/efo/EFO_0801206	GCST90176321,GCST90301085
http://purl.obolibrary.org/obo/OBA_2042575	GCST90236098
http://www.ebi.ac.uk/efo/EFO_0801207	GCST90176095,GCST90176322,GCST90257546,GCST90258151,GCST90301087
http://purl.obolibrary.org/obo/OBA_2042576	GCST90236099
http://purl.obolibrary.org/obo/MONDO_0001703	GCST90301670,GCST90301671
http://www.ebi.ac.uk/efo/EFO_0801208	GCST90176096
http://purl.obolibrary.org/obo/OBA_2042577	GCST90238512
http://www.ebi.ac.uk/efo/EFO_0801209	GCST90176097
http://purl.obolibrary.org/obo/OBA_2042578	GCST90233206
http://www.ebi.ac.uk/efo/EFO_1001821	GCST90094929
http://purl.obolibrary.org/obo/OBA_2042579	GCST90235511
http://www.ebi.ac.uk/efo/EFO_1000042	GCST004417
http://www.ebi.ac.uk/efo/EFO_1001825	GCST90081669,GCST90081670,GCST90077683,GCST90084766,GCST90077684,GCST90080780,GCST90018679,GCST90018899
http://www.ebi.ac.uk/efo/EFO_1000045	GCST003788
http://www.ebi.ac.uk/efo/EFO_1000049	GCST90013692,GCST90013734,GCST90013769,GCST90018672,GCST90018892,GCST90270069,GCST90270070,GCST90101733,GCST90275073,GCST90246013,GCST90246014
http://www.ebi.ac.uk/efo/EFO_0802080	GCST90242857,GCST90249413
http://www.ebi.ac.uk/efo/EFO_0802081	GCST90242876,GCST90249421
http://purl.obolibrary.org/obo/GO_0042476	GCST002031,GCST000610,GCST000609
http://www.ebi.ac.uk/efo/EFO_0802082	GCST90242877,GCST90249520
http://www.ebi.ac.uk/efo/EFO_0802083	GCST90242879,GCST90249648
http://www.ebi.ac.uk/efo/EFO_0802084	GCST90242882,GCST90249464
http://www.ebi.ac.uk/efo/EFO_0802085	GCST90242883,GCST90249509
http://www.ebi.ac.uk/efo/EFO_0802086	GCST90242889,GCST90249669
http://purl.obolibrary.org/obo/OBA_2041250	GCST90234778
http://www.ebi.ac.uk/efo/EFO_0802087	GCST90242893,GCST90249705
http://purl.obolibrary.org/obo/OBA_2041251	GCST90235251
http://www.ebi.ac.uk/efo/EFO_0802088	GCST90242894,GCST90249706
http://purl.obolibrary.org/obo/OBA_2041252	GCST90236960
http://www.ebi.ac.uk/efo/EFO_0802089	GCST90242895
http://www.ebi.ac.uk/efo/EFO_0022300	GCST90269615
http://purl.obolibrary.org/obo/OBA_2041253	GCST90236936
http://www.ebi.ac.uk/efo/EFO_0022301	GCST90292798,GCST90292805,GCST90292812,GCST90292819,GCST90292826,GCST90292944,GCST90292951,GCST90292958,GCST90292965,GCST90292972,GCST90292652,GCST90292659,GCST90292666,GCST90292673,GCST90292680,GCST90302146,GCST90302158,GCST90302065,GCST90302027,GCST90269509,GCST90302112
http://purl.obolibrary.org/obo/OBA_2041254	GCST90235097
http://www.ebi.ac.uk/efo/EFO_0022302	GCST90269555
http://purl.obolibrary.org/obo/OBA_2041255	GCST90234820
http://www.ebi.ac.uk/efo/EFO_0022303	GCST90269550
http://purl.obolibrary.org/obo/OBA_2041256	GCST90234634
http://www.ebi.ac.uk/efo/EFO_0022304	GCST90292770,GCST90292916,GCST90293062,GCST90302077,GCST90269545
http://purl.obolibrary.org/obo/OBA_2041257	GCST90235167
http://www.ebi.ac.uk/efo/EFO_0022305	GCST90269552
http://purl.obolibrary.org/obo/OBA_2041258	GCST90236833
http://www.ebi.ac.uk/efo/EFO_0022306	GCST90269579
http://purl.obolibrary.org/obo/OBA_2041259	GCST90235011
http://purl.obolibrary.org/obo/HP_0004348	GCST90080562,GCST90080563,GCST90084549,GCST90084548
http://www.ebi.ac.uk/efo/EFO_0022307	GCST90269523
http://www.ebi.ac.uk/efo/EFO_0022308	GCST90269522
http://www.ebi.ac.uk/efo/EFO_0022309	GCST90269520
http://purl.obolibrary.org/obo/OBA_2045140	GCST90277348,GCST90244301,GCST90244480
http://purl.obolibrary.org/obo/OBA_2045141	GCST90277270,GCST90244402,GCST90244223
http://purl.obolibrary.org/obo/OBA_2045142	GCST90277349,GCST90244302,GCST90244481
http://www.ebi.ac.uk/efo/EFO_0005250	GCST001983
http://purl.obolibrary.org/obo/OBA_2045143	GCST90277271,GCST90244403,GCST90244224
http://www.ebi.ac.uk/efo/EFO_0005251	GCST90044033,GCST90044034,GCST010762,GCST90080082,GCST90084069,GCST90084068,GCST90080083,GCST90134321,GCST90134322,GCST90134323
http://purl.obolibrary.org/obo/OBA_2045144	GCST90277350,GCST90244303,GCST90244482
http://www.ebi.ac.uk/efo/EFO_0005252	GCST002209,GCST90044032,GCST90080081,GCST90084067
http://purl.obolibrary.org/obo/OBA_2045145	GCST90277351,GCST90244304,GCST90244483
http://www.ebi.ac.uk/efo/EFO_0001378	GCST004483,GCST001331,GCST001907,GCST001906,GCST002140,GCST002921,GCST002922,GCST003051,GCST006432,GCST90079122,GCST90079123,GCST90083108,GCST90083109,GCST90041909,GCST90042760,GCST90043910,GCST009680,GCST012397,GCST012396,GCST90083626,GCST90083625,GCST90079640,GCST90079639,GCST002614,GCST004099,GCST010508,GCST90141004,GCST90141021,GCST90267403
http://purl.obolibrary.org/obo/OBA_2045146	GCST90277352,GCST90244305,GCST90244484
http://www.ebi.ac.uk/efo/EFO_0001379	GCST90038599
http://purl.obolibrary.org/obo/OBA_2045147	GCST90277353,GCST90244306,GCST90244485
http://purl.obolibrary.org/obo/OBA_2045148	GCST90277354,GCST90244307,GCST90244486
http://purl.obolibrary.org/obo/OBA_2045149	GCST90277355,GCST90244308,GCST90244487
http://www.ebi.ac.uk/efo/EFO_0802540	GCST90241141,GCST90247550
http://www.ebi.ac.uk/efo/EFO_0005257	GCST002008,GCST003224,GCST003062,GCST003300,GCST004353,GCST90029057,GCST90029066,GCST90095481,GCST90095482,GCST003939,GCST009721,GCST010456,GCST90267155,GCST90267154
http://www.ebi.ac.uk/efo/EFO_0802541	GCST90243400,GCST90241142,GCST90241143
http://www.ebi.ac.uk/efo/EFO_0802542	GCST90241144
http://www.ebi.ac.uk/efo/EFO_1001370	GCST90084526,GCST90080540
http://www.ebi.ac.uk/efo/EFO_0802543	GCST90241149
http://www.ebi.ac.uk/efo/EFO_0802544	GCST90241151
http://www.ebi.ac.uk/efo/EFO_0802545	GCST90241154,GCST90247568
http://www.ebi.ac.uk/efo/EFO_0802546	GCST90241156
http://purl.obolibrary.org/obo/OBA_2041710	GCST90239332
http://www.ebi.ac.uk/efo/EFO_0802547	GCST90241159
http://purl.obolibrary.org/obo/HP_0000924	GCST90084822,GCST90084821,GCST90084820,GCST90084819,GCST90082899,GCST90082898,GCST90082897,GCST90082896,GCST90082895,GCST90078910,GCST90078911,GCST90078909,GCST90078913,GCST90078912,GCST90080833,GCST90080834,GCST90080835,GCST90080836,GCST90309837,GCST90309840,GCST90309841,GCST90309838,GCST90309839
http://www.ebi.ac.uk/efo/EFO_1001375	GCST90043959,GCST90043960,GCST90104131,GCST008816,GCST90297710,GCST90297758,GCST90297661,GCST90297607
http://purl.obolibrary.org/obo/OBA_2041711	GCST90234798
http://www.ebi.ac.uk/efo/EFO_0802548	GCST90241160,GCST90247608
http://purl.obolibrary.org/obo/HP_0000925	GCST90044556,GCST90044557
http://purl.obolibrary.org/obo/OBA_2041712	GCST90238214
http://www.ebi.ac.uk/efo/EFO_0802549	GCST90241181,GCST90247627
http://purl.obolibrary.org/obo/OBA_2041713	GCST90235765
http://purl.obolibrary.org/obo/OBA_2041714	GCST90233047
http://purl.obolibrary.org/obo/OBA_2041715	GCST90234510,GCST90239373
http://purl.obolibrary.org/obo/GO_1902520	GCST002009,GCST002178,GCST90044854
http://purl.obolibrary.org/obo/OBA_2041716	GCST90236445
http://purl.obolibrary.org/obo/GO_1902521	GCST002000,GCST90044851
http://purl.obolibrary.org/obo/OBA_2041717	GCST90234731,GCST90179309
http://purl.obolibrary.org/obo/GO_1902522	GCST001996,GCST002176,GCST90044855
http://purl.obolibrary.org/obo/OBA_2041718	GCST90236696
http://purl.obolibrary.org/obo/OBA_2041719	GCST90236115
http://purl.obolibrary.org/obo/MONDO_0005147	GCST005563,GCST000043,GCST000258,GCST000244,GCST000038,GCST000054,GCST001191,GCST000141,GCST001394,GCST000392,GCST001479,GCST008377,GCST001255,GCST000539,GCST003097,GCST005536,GCST005320,GCST005321,GCST005322,GCST90085511,GCST90000529,GCST011539,GCST90281275,GCST90043633,GCST90043634,GCST90043635,GCST90013445,GCST90013446,GCST006196,GCST006197,GCST010681,GCST011773,GCST90014023,GCST90081525,GCST9…
http://purl.obolibrary.org/obo/MONDO_0005148	GCST004304,GCST004305,GCST004782,GCST004894,GCST004880,GCST003619,GCST000073,GCST000074,GCST000047,GCST000796,GCST000712,GCST000167,GCST000601,GCST000976,GCST000219,GCST000025,GCST000383,GCST001033,GCST000221,GCST001461,GCST001809,GCST001843,GCST001173,GCST000028,GCST000478,GCST000024,GCST001326,GCST000075,GCST001759,GCST001397,GCST000049,GCST000064,GCST000665,GCST001369,GCST001550,GCST001213,GCS…
http://purl.obolibrary.org/obo/MONDO_0005149	GCST90296098
http://www.ebi.ac.uk/efo/EFO_0801210	GCST90176098
http://www.ebi.ac.uk/efo/EFO_0801211	GCST90176066
http://purl.obolibrary.org/obo/OBA_2042580	GCST90233976
http://www.ebi.ac.uk/efo/EFO_0801212	GCST90176067
http://purl.obolibrary.org/obo/OBA_2042581	GCST90236361
http://purl.obolibrary.org/obo/OBA_2042582	GCST90233545
http://www.ebi.ac.uk/efo/EFO_0801213	GCST90176125,GCST90265767,GCST90265768
http://purl.obolibrary.org/obo/OBA_2042583	GCST90233659
http://www.ebi.ac.uk/efo/EFO_0801214	GCST90176327,GCST90258243,GCST90257638
http://www.ebi.ac.uk/efo/EFO_0801215	GCST90176126
http://purl.obolibrary.org/obo/OBA_2042584	GCST90234814
http://www.ebi.ac.uk/efo/EFO_0801216	GCST90257550,GCST90258155,GCST90176331
http://purl.obolibrary.org/obo/OBA_2042585	GCST90236100
http://www.ebi.ac.uk/efo/EFO_0801217	GCST90278867,GCST90176072
http://purl.obolibrary.org/obo/OBA_2042586	GCST90235663
http://www.ebi.ac.uk/efo/EFO_0801218	GCST90179103,GCST90301095
http://purl.obolibrary.org/obo/OBA_2042587	GCST90235787
http://www.ebi.ac.uk/efo/EFO_0801219	GCST90176128
http://purl.obolibrary.org/obo/OBA_2042588	GCST90234471,GCST90236226,GCST90238791
http://purl.obolibrary.org/obo/OBA_2042589	GCST90234701,GCST90239106
http://purl.obolibrary.org/obo/HP_0012219	GCST002729,GCST002380,GCST90301374
http://www.ebi.ac.uk/efo/EFO_0009601	GCST90044274,GCST90077720,GCST90077721,GCST90081706,GCST90081707,GCST90084612,GCST90084611,GCST90080625,GCST90080626
http://www.ebi.ac.uk/efo/EFO_0009602	GCST90080621,GCST90080622,GCST90044271,GCST90081704,GCST90081705,GCST90077718,GCST90077719,GCST90084608,GCST90084607
http://www.ebi.ac.uk/efo/EFO_0009603	GCST007672,GCST007673,GCST007674,GCST007675,GCST007676,GCST006935,GCST90239734,GCST90239735,GCST90239736,GCST90239737
http://www.ebi.ac.uk/efo/EFO_0009604	GCST90079944,GCST90083930
http://www.ebi.ac.uk/efo/EFO_1001837	GCST90080657,GCST90084643
http://www.ebi.ac.uk/efo/EFO_0009605	GCST90044207,GCST90081675,GCST90081676,GCST90077689,GCST90077690,GCST90080312,GCST90080313,GCST90084299,GCST90084298,GCST90083736,GCST90079750,GCST90246156
http://www.ebi.ac.uk/efo/EFO_0000501	GCST004754
http://www.ebi.ac.uk/efo/EFO_0009606	GCST90079399,GCST90079398,GCST90079434,GCST90083385,GCST90083384,GCST90044338,GCST90083420,GCST90104238,GCST90013955,GCST90013905
http://www.ebi.ac.uk/efo/EFO_1000059	GCST002700,GCST90103794,GCST90269767
http://www.ebi.ac.uk/efo/EFO_0009607	GCST90083740,GCST90079754
http://www.ebi.ac.uk/efo/EFO_0000503	GCST002990
http://www.ebi.ac.uk/efo/EFO_0009608	GCST90038620,GCST90077688,GCST90078828,GCST90081673,GCST90081674,GCST90082814,GCST90077687,GCST90080212,GCST90080211,GCST90084197,GCST90084198
http://www.ebi.ac.uk/efo/EFO_0009609	GCST009817,GCST90018662,GCST90018882
http://www.ebi.ac.uk/efo/EFO_0802090	GCST90242896,GCST90249449
http://www.ebi.ac.uk/efo/EFO_0802091	GCST90242897
http://www.ebi.ac.uk/efo/EFO_0802092	GCST90242898,GCST90249415
http://www.ebi.ac.uk/efo/EFO_0802093	GCST90242903,GCST90249678
http://www.ebi.ac.uk/efo/EFO_0802094	GCST90242904,GCST90249577
http://purl.obolibrary.org/obo/HP_0000471	GCST90080238,GCST90084224
http://www.ebi.ac.uk/efo/EFO_0802095	GCST90242905,GCST90242906,GCST90249716
http://www.ebi.ac.uk/efo/EFO_0802096	GCST90242907,GCST90249578
http://purl.obolibrary.org/obo/OBA_2041260	GCST90234111
http://www.ebi.ac.uk/efo/EFO_0802097	GCST90242908
http://purl.obolibrary.org/obo/OBA_2041261	GCST90238229
http://www.ebi.ac.uk/efo/EFO_0802098	GCST90242911,GCST90249730
http://purl.obolibrary.org/obo/OBA_2041262	GCST90233620,GCST90179282
http://www.ebi.ac.uk/efo/EFO_0802099	GCST90242912,GCST90242913
http://www.ebi.ac.uk/efo/EFO_0022310	GCST90293020,GCST90292728,GCST90292874,GCST90302037,GCST90269663
http://purl.obolibrary.org/obo/OBA_2041263	GCST90234970
http://purl.obolibrary.org/obo/HP_0000478	GCST90301375
http://www.ebi.ac.uk/efo/EFO_0022311	GCST90293027,GCST90292735,GCST90292881,GCST90302085,GCST90269670
http://purl.obolibrary.org/obo/OBA_2041264	GCST90234181
http://purl.obolibrary.org/obo/MONDO_0019091	GCST004783,GCST001197,GCST002104,GCST001789,GCST006460
http://www.ebi.ac.uk/efo/EFO_0022312	GCST90292714,GCST90292860,GCST90293006,GCST90302132,GCST90269649
http://purl.obolibrary.org/obo/OBA_2041265	GCST90238374
http://www.ebi.ac.uk/efo/EFO_0022313	GCST90292797,GCST90292943,GCST90292651,GCST90302144,GCST90269586
http://purl.obolibrary.org/obo/OBA_2041266	GCST90238031
http://www.ebi.ac.uk/efo/EFO_0022314	GCST90269521
http://purl.obolibrary.org/obo/OBA_2041267	GCST90238090
http://www.ebi.ac.uk/efo/EFO_0022315	GCST90269508
http://purl.obolibrary.org/obo/OBA_2041268	GCST90238022
http://www.ebi.ac.uk/efo/EFO_0022316	GCST90269584
http://purl.obolibrary.org/obo/OBA_2041269	GCST90238251
http://www.ebi.ac.uk/efo/EFO_0001380	GCST90043643
http://www.ebi.ac.uk/efo/EFO_0022317	GCST90269507
http://www.ebi.ac.uk/efo/EFO_0022318	GCST90293018,GCST90292726,GCST90292872,GCST90269661,GCST90302005
http://www.ebi.ac.uk/efo/EFO_0001382	GCST001876
http://www.ebi.ac.uk/efo/EFO_0022319	GCST90292844,GCST90292990,GCST90292698,GCST90269633,GCST90302017
http://purl.obolibrary.org/obo/OBA_2045150	GCST90277356,GCST90244309,GCST90244488
http://purl.obolibrary.org/obo/OBA_2045151	GCST90277357,GCST90244310,GCST90244489
http://purl.obolibrary.org/obo/OBA_2045152	GCST90277358,GCST90244311,GCST90244490
http://www.ebi.ac.uk/efo/EFO_0005260	GCST002001,GCST002177,GCST90044861,GCST90044863,GCST010732
http://purl.obolibrary.org/obo/OBA_2045153	GCST90277359,GCST90244312,GCST90244491
http://purl.obolibrary.org/obo/OBA_2045154	GCST90277360,GCST90244313,GCST90244492
http://www.ebi.ac.uk/efo/EFO_0005262	GCST001864
http://purl.obolibrary.org/obo/OBA_2045155	GCST90277361,GCST90244314,GCST90244493
http://purl.obolibrary.org/obo/OBA_2045156	GCST90277362,GCST90244315,GCST90244494
http://purl.obolibrary.org/obo/OBA_2045157	GCST90277363,GCST90244316,GCST90244495
http://purl.obolibrary.org/obo/OBA_2045158	GCST90277364,GCST90244317,GCST90244496
http://www.ebi.ac.uk/efo/EFO_0005266	GCST002028,GCST002039,GCST90100532,GCST90100553
http://purl.obolibrary.org/obo/OBA_2045159	GCST90277365,GCST90244318,GCST90244497
http://www.ebi.ac.uk/efo/EFO_0802550	GCST90241183,GCST90247612
http://www.ebi.ac.uk/efo/EFO_0005267	GCST002041,GCST90032165
http://www.ebi.ac.uk/efo/EFO_0802551	GCST90241190,GCST90247572
http://www.ebi.ac.uk/efo/EFO_0005268	GCST002040,GCST90032166
http://www.ebi.ac.uk/efo/EFO_0802552	GCST90241199
http://www.ebi.ac.uk/efo/EFO_0005269	GCST002036,GCST013022
http://www.ebi.ac.uk/efo/EFO_0802553	GCST90241200,GCST90247630
http://www.ebi.ac.uk/efo/EFO_0010570	GCST009557
http://www.ebi.ac.uk/efo/EFO_0802554	GCST90241202
http://www.ebi.ac.uk/efo/EFO_0802555	GCST90241205,GCST90247651
http://www.ebi.ac.uk/efo/EFO_0802556	GCST90241207,GCST90247527
http://www.ebi.ac.uk/efo/EFO_0010572	GCST009552,GCST009551,GCST012433,GCST012432,GCST012434
http://purl.obolibrary.org/obo/OBA_2041720	GCST90234509,GCST90238084
http://www.ebi.ac.uk/efo/EFO_0802557	GCST90241210,GCST90247558
http://purl.obolibrary.org/obo/MONDO_0022208	GCST90084383,GCST90080397
http://purl.obolibrary.org/obo/HP_0000934	GCST90043663
http://www.ebi.ac.uk/efo/EFO_0010573	GCST90012012,GCST90241670,GCST90101220,GCST90237110,GCST009567,GCST90137609,GCST90238620,GCST90161500,GCST90225741,GCST90248156,GCST90274899
http://www.ebi.ac.uk/efo/EFO_0010574	GCST009568,GCST90179290,GCST90225722,GCST90274891
http://purl.obolibrary.org/obo/OBA_2041721	GCST90236211,GCST90235185
http://www.ebi.ac.uk/efo/EFO_0802558	GCST90241213,GCST90247794
http://purl.obolibrary.org/obo/OBA_2041722	GCST90233640
http://www.ebi.ac.uk/efo/EFO_0802559	GCST90241214,GCST90247652
http://www.ebi.ac.uk/efo/EFO_0010575	GCST90012069,GCST90087372,GCST90087913,GCST90243321,GCST90243322,GCST90234295,GCST009571,GCST90161285,GCST90179465,GCST90250162,GCST90277419
http://purl.obolibrary.org/obo/OBA_2041723	GCST90233350
http://www.ebi.ac.uk/efo/EFO_1001388	GCST90044299,GCST90044300,GCST90080642,GCST90080645,GCST90084628,GCST90084631,GCST90246192
http://www.ebi.ac.uk/efo/EFO_0010576	GCST010677,GCST010678,GCST90011734,GCST90011735,GCST90011736,GCST009547,GCST010864,GCST010860
http://purl.obolibrary.org/obo/OBA_2041724	GCST90234339
http://purl.obolibrary.org/obo/HP_0000938	GCST90077962,GCST90081947,GCST90081948,GCST90077961
http://www.ebi.ac.uk/efo/EFO_0010577	GCST009546,GCST009545
http://purl.obolibrary.org/obo/OBA_2041725	GCST90238265
http://www.ebi.ac.uk/efo/EFO_0010578	GCST90079076,GCST90079075,GCST90083061,GCST90083062,GCST009923,GCST009924,GCST009606,GCST90270117,GCST90270119
http://purl.obolibrary.org/obo/OBA_2041726	GCST90234453
http://purl.obolibrary.org/obo/OBA_2041727	GCST90238640
http://purl.obolibrary.org/obo/OBA_2041728	GCST90235491
http://purl.obolibrary.org/obo/OBA_2041729	GCST90239279
http://www.ebi.ac.uk/efo/EFO_0801220	GCST90176104
http://www.ebi.ac.uk/efo/EFO_0801221	GCST90178703,GCST90301167
http://purl.obolibrary.org/obo/OBA_2042590	GCST90235824
http://www.ebi.ac.uk/efo/EFO_0801222	GCST90176079
http://purl.obolibrary.org/obo/OBA_2042591	GCST90233341
http://purl.obolibrary.org/obo/OBA_2042592	GCST90233712
http://www.ebi.ac.uk/efo/EFO_0801223	GCST90178710
http://purl.obolibrary.org/obo/OBA_2042593	GCST90233694
http://www.ebi.ac.uk/efo/EFO_0801224	GCST90178711,GCST90179104,GCST90266131,GCST90266132,GCST90257559,GCST90258164,GCST90300482
http://purl.obolibrary.org/obo/OBA_2042594	GCST90239311
http://www.ebi.ac.uk/efo/EFO_0801225	GCST90179105,GCST90300266
http://www.ebi.ac.uk/efo/EFO_0801226	GCST90176106,GCST90179106,GCST90300268
http://purl.obolibrary.org/obo/OBA_2042595	GCST90234576
http://www.ebi.ac.uk/efo/EFO_0801227	GCST90104902,GCST90104903,GCST90104904
http://purl.obolibrary.org/obo/OBA_2042596	GCST90236400
http://www.ebi.ac.uk/efo/EFO_0801228	GCST90133164,GCST90133165,GCST90133166,GCST90133167,GCST90133168,GCST90133169,GCST90133170,GCST90133171,GCST90133172,GCST90133173,GCST90133174,GCST90133175,GCST90133176,GCST90133177,GCST90133178,GCST90133179,GCST90133180,GCST90133181,GCST90133182,GCST90133183,GCST90133184,GCST90133185,GCST90133186,GCST90133187,GCST90133188,GCST90133289,GCST90133290,GCST90133291,GCST90133292,GCST90133293,GCST90133…
http://purl.obolibrary.org/obo/OBA_2042597	GCST90238256
http://www.ebi.ac.uk/efo/EFO_0801229	GCST90255365,GCST90255364,GCST90101804,GCST90101805,GCST90101806,GCST90101807,GCST90204202,GCST90204203,GCST90204204,GCST90204205,GCST90239753,GCST90239754,GCST90239755,GCST90239756,GCST90239757,GCST90239758,GCST90239759,GCST90239760,GCST90239761,GCST90239762,GCST90239763,GCST90239764,GCST90239765,GCST90239766,GCST90239767,GCST90239768,GCST90239769,GCST90239770,GCST90239771,GCST90239772,GCST90239…
http://purl.obolibrary.org/obo/OBA_2042598	GCST90234725
http://purl.obolibrary.org/obo/OBA_2042599	GCST90235077
http://www.ebi.ac.uk/efo/EFO_1000062	GCST90044159
http://purl.obolibrary.org/obo/HP_0012228	GCST90043719
http://www.ebi.ac.uk/efo/EFO_0009610	GCST90038693,GCST90081877,GCST90081878,GCST90077892,GCST90077891
http://purl.obolibrary.org/obo/OBA_2040400	GCST90234475,GCST90237132
http://purl.obolibrary.org/obo/OBA_2040401	GCST90233966
http://purl.obolibrary.org/obo/HP_0010992	GCST90025929,GCST009927,GCST90084598,GCST90080612
http://purl.obolibrary.org/obo/HP_0030148	GCST90038612,GCST90084742,GCST90084741,GCST90080755,GCST90080756
http://www.ebi.ac.uk/efo/EFO_0009613	GCST90081968,GCST90081969,GCST90077982,GCST90077983,GCST90044634
http://purl.obolibrary.org/obo/OBA_2040402	GCST90238943,GCST90238944,GCST90239492
http://www.ebi.ac.uk/efo/EFO_0009614	GCST90081952,GCST90081953,GCST90084961,GCST90077966,GCST90077967,GCST90080975,GCST90044641
http://purl.obolibrary.org/obo/OBA_2040403	GCST90236564
http://www.ebi.ac.uk/efo/EFO_0009615	GCST90044637
http://purl.obolibrary.org/obo/OBA_2040404	GCST90235178
http://www.ebi.ac.uk/efo/EFO_0009616	GCST90081960,GCST90081961,GCST90077974,GCST90077975
http://purl.obolibrary.org/obo/OBA_2040405	GCST90234968
http://www.ebi.ac.uk/efo/EFO_0009617	GCST90044635
http://purl.obolibrary.org/obo/OBA_2040406	GCST90233325,GCST90233789
http://www.ebi.ac.uk/efo/EFO_0009618	GCST90043721,GCST90081970,GCST90077984,GCST90044637
http://purl.obolibrary.org/obo/OBA_2040407	GCST90236000
http://purl.obolibrary.org/obo/OBA_2040408	GCST90236976
http://purl.obolibrary.org/obo/OBA_2040409	GCST90235747
http://www.ebi.ac.uk/efo/EFO_0000519	GCST001470,GCST003220,GCST006480,GCST004349
http://purl.obolibrary.org/obo/HP_0000483	GCST000706,GCST001339,GCST001819,GCST002064,GCST002685,GCST90079393,GCST90079392,GCST90079391,GCST90081507,GCST90083379,GCST90083378,GCST90083377,GCST90044224,GCST90044225,GCST90044226,GCST90044329,GCST90081505,GCST90079271,GCST90085492,GCST90085491,GCST90085493,GCST90081506,GCST90079272,GCST90083258,GCST90083257,GCST007158,GCST007160
http://purl.obolibrary.org/obo/OBA_2041270	GCST90237984
http://purl.obolibrary.org/obo/OBA_2041271	GCST90238897
http://purl.obolibrary.org/obo/OBA_2041272	GCST90238036
http://purl.obolibrary.org/obo/HP_0000486	GCST90079490,GCST90079489,GCST90083476,GCST90083475,GCST90043804,GCST90044330,GCST90079915,GCST90083901,GCST009247
http://www.ebi.ac.uk/efo/EFO_0022320	GCST90269506
http://purl.obolibrary.org/obo/OBA_2041273	GCST90233846
http://www.ebi.ac.uk/efo/EFO_0022321	GCST90293025,GCST90292733,GCST90292879,GCST90302041,GCST90269668
http://purl.obolibrary.org/obo/OBA_2041274	GCST90238929
http://www.ebi.ac.uk/efo/EFO_0022322	GCST90292851,GCST90292997,GCST90292705,GCST90302053,GCST90269640
http://purl.obolibrary.org/obo/OBA_2041275	GCST90233084
http://www.ebi.ac.uk/efo/EFO_0022323	GCST90292712,GCST90292858,GCST90293004,GCST90302101,GCST90269647
http://purl.obolibrary.org/obo/OBA_2041276	GCST90239302
http://www.ebi.ac.uk/efo/EFO_0022324	GCST90293011,GCST90292719,GCST90292865,GCST90302136,GCST90269654
http://purl.obolibrary.org/obo/OBA_2041277	GCST90238883
http://www.ebi.ac.uk/efo/EFO_0022325	GCST90292802,GCST90292948,GCST90292656,GCST90302148,GCST90269591
http://purl.obolibrary.org/obo/OBA_2041278	GCST90238092
http://www.ebi.ac.uk/efo/EFO_0022326	GCST90269505
http://purl.obolibrary.org/obo/OBA_2041279	GCST90239372
http://www.ebi.ac.uk/efo/EFO_0022327	GCST90269532
http://www.ebi.ac.uk/efo/EFO_0022328	GCST90269680
http://www.ebi.ac.uk/efo/EFO_0022329	GCST90269710
http://purl.obolibrary.org/obo/OBA_2045160	GCST90277366,GCST90244319,GCST90244498
http://purl.obolibrary.org/obo/OBA_2045161	GCST90277367,GCST90244320,GCST90244499
http://purl.obolibrary.org/obo/OBA_2045162	GCST90277386,GCST90244339,GCST90244518
http://purl.obolibrary.org/obo/OBA_2045163	GCST90277394,GCST90244347,GCST90244526
http://www.ebi.ac.uk/efo/EFO_0005271	GCST004694,GCST003741,GCST002711,GCST003112,GCST003111,GCST003839,GCST003840,GCST006685,GCST006686,GCST003980,GCST003982,GCST007801,GCST009368,GCST009358,GCST009367,GCST009366,GCST009365,GCST009364,GCST009363,GCST009362,GCST009369,GCST009361,GCST009360,GCST009359,GCST002053,GCST002565,GCST003542,GCST006914,GCST011659,GCST007559,GCST007560,GCST007561,GCST007982,GCST008770,GCST012039,GCST012038,GCS…
http://purl.obolibrary.org/obo/OBA_2045164	GCST90277395,GCST90244348,GCST90244527
http://www.ebi.ac.uk/efo/EFO_0005272	GCST007803,GCST007804,GCST002049,GCST003542,GCST011976,GCST90244776,GCST90244784
http://purl.obolibrary.org/obo/OBA_2045165	GCST90277402,GCST90244355,GCST90244534
http://www.ebi.ac.uk/efo/EFO_0005273	GCST002054
http://purl.obolibrary.org/obo/OBA_2045166	GCST90277403,GCST90244356,GCST90244535
http://www.ebi.ac.uk/efo/EFO_0005274	GCST002050,GCST90244771,GCST90244779
http://purl.obolibrary.org/obo/OBA_2045167	GCST90277258,GCST90244390,GCST90244211
http://www.ebi.ac.uk/efo/EFO_0005275	GCST002120
http://purl.obolibrary.org/obo/OBA_2045168	GCST90277259,GCST90244391,GCST90244212
http://www.ebi.ac.uk/efo/EFO_0005276	GCST002119
http://purl.obolibrary.org/obo/OBA_2045169	GCST90277260,GCST90244392,GCST90244213
http://www.ebi.ac.uk/efo/EFO_0802560	GCST90241232,GCST90247682
http://www.ebi.ac.uk/efo/EFO_0802561	GCST90241239
http://www.ebi.ac.uk/efo/EFO_0005278	GCST000087,GCST003298,GCST90102513
http://www.ebi.ac.uk/efo/EFO_0802562	GCST90241240,GCST90247684
http://www.ebi.ac.uk/efo/EFO_0005279	GCST004034,GCST002029,GCST007619,GCST90044107
http://www.ebi.ac.uk/efo/EFO_0802563	GCST90241241
http://www.ebi.ac.uk/efo/EFO_0802564	GCST90241252
http://www.ebi.ac.uk/efo/EFO_1001393	GCST90093139,GCST90093140,GCST90093141
http://www.ebi.ac.uk/efo/EFO_0802565	GCST90241254
http://www.ebi.ac.uk/efo/EFO_0802566	GCST90241255,GCST90247732
http://purl.obolibrary.org/obo/OBA_2041730	GCST90234418
http://www.ebi.ac.uk/efo/EFO_0802567	GCST90241260,GCST90247736
http://www.ebi.ac.uk/efo/EFO_0010583	GCST009651,GCST90104260,GCST90240247,GCST90238093,GCST90162441,GCST90225925,GCST90225987,GCST90239635,GCST90278615,GCST90103741
http://www.ebi.ac.uk/efo/EFO_1001395	GCST90044025,GCST90080058,GCST90084045,GCST90084044,GCST90080059,GCST90103408
http://purl.obolibrary.org/obo/OBA_2041731	GCST90239519,GCST90179310
http://www.ebi.ac.uk/efo/EFO_0802568	GCST90241262,GCST90247738
http://www.ebi.ac.uk/efo/EFO_0010584	GCST009648,GCST90104259,GCST90103745
http://purl.obolibrary.org/obo/HP_0003040	GCST90080393,GCST90084379,GCST90044652
http://purl.obolibrary.org/obo/OBA_2041732	GCST90234981
http://www.ebi.ac.uk/efo/EFO_0802569	GCST90241263
http://www.ebi.ac.uk/efo/EFO_0010585	GCST009649,GCST90085712,GCST90085794,GCST90103744
http://purl.obolibrary.org/obo/OBA_2041733	GCST90233494
http://www.ebi.ac.uk/efo/EFO_0021000	GCST90133834,GCST90264976,GCST90264980,GCST90243568,GCST90139602,GCST90102921,GCST90245157,GCST90200439,GCST90201840,GCST90202877,GCST90203854,GCST90299576
http://www.ebi.ac.uk/efo/EFO_0010586	GCST90090256,GCST90090651,GCST90000451,GCST90274772,GCST90085714,GCST90244824,GCST90274884
http://purl.obolibrary.org/obo/OBA_2041734	GCST90234538
http://www.ebi.ac.uk/efo/EFO_0021001	GCST90133833,GCST90264981,GCST90243806,GCST90280366,GCST90139434,GCST90102923,GCST90245160,GCST90202207,GCST90203247,GCST90201180,GCST90199784,GCST90299958
http://www.ebi.ac.uk/efo/EFO_0010587	GCST90019431,GCST90088237,GCST90241612,GCST90161640,GCST90179335,GCST90274897
http://purl.obolibrary.org/obo/OBA_2041735	GCST90234539
http://www.ebi.ac.uk/efo/EFO_0021002	GCST90134029,GCST90129183,GCST90265572,GCST90265573,GCST90243561,GCST90139415,GCST90245320,GCST90239712,GCST90103081,GCST90202133,GCST90199688,GCST90201087,GCST90203154,GCST90299721
http://www.ebi.ac.uk/efo/EFO_0010588	GCST90038447,GCST90012033,GCST90000487,GCST90274826,GCST90085804,GCST90085755,GCST90244842,GCST90274903
http://www.ebi.ac.uk/efo/EFO_0009167	GCST90094874
http://purl.obolibrary.org/obo/OBA_2041736	GCST90236750
http://www.ebi.ac.uk/efo/EFO_0021003	GCST90133701,GCST90176141,GCST90264594,GCST90264595,GCST90243440,GCST90128867,GCST90258312,GCST90257707,GCST90139545,GCST90245047,GCST90102819,GCST90201701,GCST90200311,GCST90203731,GCST90202744,GCST90299514
http://www.ebi.ac.uk/efo/EFO_0010589	GCST90012050,GCST90000488,GCST90274827,GCST90085756,GCST90274904
http://purl.obolibrary.org/obo/OBA_2041737	GCST90233511
http://www.ebi.ac.uk/efo/EFO_0021004	GCST90133693,GCST90264568,GCST90264569,GCST90243486,GCST90258311,GCST90257706,GCST90139393,GCST90245042,GCST90102814,GCST90202061,GCST90199628,GCST90201025,GCST90203107,GCST90299704
http://www.ebi.ac.uk/efo/EFO_0021005	GCST90243827,GCST90128983,GCST90129026
http://purl.obolibrary.org/obo/OBA_2041738	GCST90236979
http://purl.obolibrary.org/obo/OBA_2041739	GCST90235168
http://www.ebi.ac.uk/efo/EFO_0021006	GCST90134123,GCST90265850,GCST90265851,GCST90243435,GCST90139537,GCST90245379,GCST90103150,GCST90201668,GCST90200294,GCST90203718,GCST90202710,GCST90299761
http://www.ebi.ac.uk/efo/EFO_0021007	GCST90243836
http://www.ebi.ac.uk/efo/EFO_0021008	GCST90133664,GCST90243575,GCST90139567,GCST90245013,GCST90102791,GCST90200371,GCST90201758,GCST90203788,GCST90202795,GCST90299829
http://www.ebi.ac.uk/efo/EFO_0021009	GCST90133684,GCST90264547,GCST90264548,GCST90243467,GCST90139553,GCST90245034,GCST90102810,GCST90201725,GCST90200328,GCST90203760,GCST90299698
http://www.ebi.ac.uk/efo/EFO_0801230	GCST90091143,GCST90091175,GCST90091156,GCST90091186,GCST90091205,GCST90091198,GCST90091165
http://www.ebi.ac.uk/efo/EFO_0801231	GCST002961
http://www.ebi.ac.uk/efo/EFO_0801232	GCST90239997
http://www.ebi.ac.uk/efo/EFO_0801233	GCST90239998
http://www.ebi.ac.uk/efo/EFO_0801234	GCST90239999
http://www.ebi.ac.uk/efo/EFO_0801235	GCST90240000
http://www.ebi.ac.uk/efo/EFO_0801236	GCST90240003
http://www.ebi.ac.uk/efo/EFO_0801237	GCST90240004
http://www.ebi.ac.uk/efo/EFO_0801238	GCST90240005
http://purl.obolibrary.org/obo/HP_0030151	GCST90044199,GCST90080305,GCST90084291
http://purl.obolibrary.org/obo/HP_0012235	GCST002595,GCST004781,GCST003628,GCST003018,GCST003527,GCST003526,GCST003450,GCST011105,GCST011106,GCST003580
http://www.ebi.ac.uk/efo/EFO_0801239	GCST90240007
http://www.ebi.ac.uk/efo/EFO_0009620	GCST90081962,GCST90081963,GCST90077977,GCST90084949,GCST90084947,GCST90084946,GCST90077976,GCST90080960,GCST90080961,GCST90080963,GCST90044645,GCST90246220
http://www.ebi.ac.uk/efo/EFO_0009621	GCST90044641
http://purl.obolibrary.org/obo/OBA_2040410	GCST90233570
http://www.ebi.ac.uk/efo/EFO_0009622	GCST90044638
http://purl.obolibrary.org/obo/HP_0030158	GCST90246355
http://purl.obolibrary.org/obo/OBA_2040411	GCST90234973
http://www.ebi.ac.uk/efo/EFO_0009623	GCST90081950,GCST90081951,GCST90084939,GCST90077964,GCST90077965,GCST90080953,GCST90044665
http://purl.obolibrary.org/obo/OBA_2040412	GCST90235634
http://www.ebi.ac.uk/efo/EFO_1001857	GCST006575,GCST006984,GCST011939,GCST011938,GCST011937,GCST011936,GCST011935,GCST011934,GCST006863,GCST90137503
http://purl.obolibrary.org/obo/OBA_2040413	GCST90238163
http://www.ebi.ac.uk/efo/EFO_0009625	GCST90044342,GCST90044404
http://www.ebi.ac.uk/efo/EFO_1001858	GCST90077794,GCST90081780
http://purl.obolibrary.org/obo/OBA_2040414	GCST90239360
http://www.ebi.ac.uk/efo/EFO_1001859	GCST90080624,GCST90044272,GCST90084610,GCST90084609,GCST90080623,GCST90281191
http://purl.obolibrary.org/obo/OBA_2040415	GCST90234251
http://purl.obolibrary.org/obo/OBA_2040416	GCST90234358
http://www.ebi.ac.uk/efo/EFO_0009628	GCST90084923,GCST90084920,GCST90084921,GCST90084922,GCST90080934,GCST90080936,GCST90080937,GCST90080935,GCST90246214
http://purl.obolibrary.org/obo/OBA_2040417	GCST90236065
http://purl.obolibrary.org/obo/HP_0009588	GCST90134433
http://purl.obolibrary.org/obo/OBA_2040418	GCST90234130
http://purl.obolibrary.org/obo/OBA_2040419	GCST90236242
http://purl.obolibrary.org/obo/OBA_2044300	GCST90236032
http://purl.obolibrary.org/obo/OBA_2044301	GCST90236036
http://purl.obolibrary.org/obo/OBA_2044302	GCST90236381
http://purl.obolibrary.org/obo/OBA_2041280	GCST90235464
http://purl.obolibrary.org/obo/OBA_2044303	GCST90235398
http://purl.obolibrary.org/obo/OBA_2041281	GCST90238223
http://purl.obolibrary.org/obo/OBA_2041282	GCST90238901
http://purl.obolibrary.org/obo/OBA_2044305	GCST90236828
http://purl.obolibrary.org/obo/HP_0004371	GCST90043671
http://www.ebi.ac.uk/efo/EFO_0022330	GCST90269735
http://purl.obolibrary.org/obo/OBA_2044306	GCST90239440
http://purl.obolibrary.org/obo/OBA_2041283	GCST90239159
http://www.ebi.ac.uk/efo/EFO_0022331	GCST90269715
http://purl.obolibrary.org/obo/OBA_2044307	GCST90233162
http://purl.obolibrary.org/obo/OBA_2041284	GCST90238261
http://www.ebi.ac.uk/efo/EFO_0022332	GCST90269690
http://purl.obolibrary.org/obo/OBA_2041285	GCST90239315
http://purl.obolibrary.org/obo/OBA_2044308	GCST90238005
http://www.ebi.ac.uk/efo/EFO_0022333	GCST90269740
http://purl.obolibrary.org/obo/OBA_2041286	GCST90235205
http://purl.obolibrary.org/obo/OBA_2044309	GCST90238498
http://www.ebi.ac.uk/efo/EFO_0022334	GCST90269720
http://purl.obolibrary.org/obo/OBA_2041287	GCST90238520
http://www.ebi.ac.uk/efo/EFO_0022335	GCST90269695
http://purl.obolibrary.org/obo/OBA_2041288	GCST90233855
http://www.ebi.ac.uk/efo/EFO_0022336	GCST90269745
http://purl.obolibrary.org/obo/OBA_2041289	GCST90233390
http://www.ebi.ac.uk/efo/EFO_0022337	GCST90269725
http://www.ebi.ac.uk/efo/EFO_0022338	GCST90269700
http://purl.obolibrary.org/obo/GO_1905119	GCST006298,GCST002465
http://www.ebi.ac.uk/efo/EFO_0008300	GCST90012011,GCST004424,GCST90274843,GCST90085785,GCST90274916
http://www.ebi.ac.uk/efo/EFO_0022339	GCST90269730
http://purl.obolibrary.org/obo/OBA_2045170	GCST90277261,GCST90244393,GCST90244214
http://www.ebi.ac.uk/efo/EFO_0008301	GCST90243031,GCST90101609,GCST90237462,GCST90137894,GCST90161876,GCST90225854,GCST90225669,GCST90249896
http://purl.obolibrary.org/obo/OBA_2045171	GCST90277262,GCST90244394,GCST90244215
http://www.ebi.ac.uk/efo/EFO_0008302	GCST90243062,GCST90101615,GCST90237289,GCST90137770,GCST90161688,GCST90225827,GCST90249854
http://purl.obolibrary.org/obo/OBA_2045172	GCST90277263,GCST90244395,GCST90244216
http://www.ebi.ac.uk/efo/EFO_0005280	GCST003481,GCST90104209,GCST002051,GCST003542
http://www.ebi.ac.uk/efo/EFO_0008303	GCST90090629,GCST90243078,GCST90243079,GCST90243080,GCST90243081,GCST90101618,GCST90137790,GCST90238868,GCST90237826,GCST90238982,GCST90238840,GCST90162277,GCST90225972,GCST90225660,GCST90249856
http://purl.obolibrary.org/obo/OBA_2045173	GCST90277368,GCST90244321,GCST90244500
http://www.ebi.ac.uk/efo/EFO_0008304	GCST90243110,GCST90243111,GCST90101619,GCST90237706,GCST90137761,GCST90238887,GCST90162141,GCST90179435,GCST90249815
http://purl.obolibrary.org/obo/OBA_2045174	GCST90277371,GCST90244324,GCST90244503
http://www.ebi.ac.uk/efo/EFO_0008305	GCST90243126,GCST90101626,GCST90137836,GCST90237813,GCST90162262,GCST90249983
http://purl.obolibrary.org/obo/OBA_2045175	GCST90277370,GCST90244323,GCST90244502
http://www.ebi.ac.uk/efo/EFO_0008306	GCST90243128,GCST90101628,GCST90234294,GCST90237362,GCST90137856,GCST90161765,GCST90225892,GCST90225723,GCST90249955
http://purl.obolibrary.org/obo/OBA_2045176	GCST90277369,GCST90244322,GCST90244501
http://www.ebi.ac.uk/efo/EFO_0008307	GCST004689,GCST004690,GCST90087135
http://purl.obolibrary.org/obo/OBA_2045177	GCST90277373,GCST90244326,GCST90244505
http://www.ebi.ac.uk/efo/EFO_0008308	GCST004425,GCST90000499
http://purl.obolibrary.org/obo/OBA_2045178	GCST90277372,GCST90244325,GCST90244504
http://www.ebi.ac.uk/efo/EFO_0008309	GCST90243168,GCST90243169,GCST90101651,GCST90234199,GCST90137740,GCST90237855,GCST90162307,GCST90249838
http://purl.obolibrary.org/obo/OBA_2045179	GCST90277375,GCST90244328,GCST90244507
http://www.ebi.ac.uk/efo/EFO_0802570	GCST90241276,GCST90247789
http://www.ebi.ac.uk/efo/EFO_0802571	GCST90241284,GCST90248165
http://www.ebi.ac.uk/efo/EFO_0802572	GCST90241289,GCST90247824
http://www.ebi.ac.uk/efo/EFO_0802573	GCST90241290
http://purl.obolibrary.org/obo/MONDO_0001285	GCST90080650,GCST90084636
http://www.ebi.ac.uk/efo/EFO_0802574	GCST90241292,GCST90247788
http://purl.obolibrary.org/obo/HP_0000951	GCST90084811,GCST90084810,GCST90080824,GCST90080825
http://www.ebi.ac.uk/efo/EFO_0010590	GCST90012070,GCST90179362,GCST90274905
http://www.ebi.ac.uk/efo/EFO_0802575	GCST90241295
http://www.ebi.ac.uk/efo/EFO_0009170	GCST90044874,GCST90044875,GCST90044876,GCST90044877,GCST90044878,GCST90044879,GCST90044881,GCST90044882,GCST90044883,GCST90044884,GCST90044885,GCST90044886,GCST90044887,GCST90044889,GCST90044890
http://purl.obolibrary.org/obo/HP_0000952	GCST90044191,GCST90081893,GCST90081894,GCST90084792,GCST90077907,GCST90077908,GCST90080806
http://www.ebi.ac.uk/efo/EFO_0010591	GCST90012056,GCST90085758,GCST90085805,GCST90179365,GCST90274906
http://www.ebi.ac.uk/efo/EFO_0010592	GCST90243150,GCST90101639,GCST90237373,GCST90137689,GCST90161776,GCST90225666,GCST90225996,GCST90249826,GCST90274883
http://www.ebi.ac.uk/efo/EFO_0802576	GCST90241297
http://purl.obolibrary.org/obo/OBA_2041740	GCST90235261
http://www.ebi.ac.uk/efo/EFO_0009172	GCST90101604,GCST90237056,GCST90161438,GCST90249772
http://www.ebi.ac.uk/efo/EFO_0802577	GCST90241300,GCST90241301,GCST90247761
http://www.ebi.ac.uk/efo/EFO_0010593	GCST90012006,GCST90235310,GCST90085722,GCST90179272,GCST90274889
http://purl.obolibrary.org/obo/OBA_2041741	GCST90235328
http://www.ebi.ac.uk/efo/EFO_0010594	GCST90241191,GCST90241192,GCST90101025,GCST90237217,GCST90234183,GCST90161613,GCST90274791,GCST90247626,GCST90244833,GCST90274892
http://www.ebi.ac.uk/efo/EFO_0802578	GCST90241305,GCST90247762
http://purl.obolibrary.org/obo/OBA_2041742	GCST90234375
http://www.ebi.ac.uk/efo/EFO_0010595	GCST90233060,GCST90233321,GCST90137556,GCST90161270,GCST90247943,GCST90274894
http://www.ebi.ac.uk/efo/EFO_0802579	GCST90241321,GCST90247771
http://purl.obolibrary.org/obo/OBA_2041743	GCST90234965
http://www.ebi.ac.uk/efo/EFO_0021010	GCST90133695,GCST90243487,GCST90140655,GCST90245044,GCST90102816,GCST90202064,GCST90199635,GCST90201035,GCST90203111,GCST90299759
http://www.ebi.ac.uk/efo/EFO_0009175	GCST005925,GCST005926
http://purl.obolibrary.org/obo/HP_0000957	GCST011464
http://www.ebi.ac.uk/efo/EFO_0010596	GCST90012007,GCST90000483,GCST90274900
http://purl.obolibrary.org/obo/OBA_2041744	GCST90234750
http://www.ebi.ac.uk/efo/EFO_0021011	GCST90134115,GCST90265808,GCST90265809,GCST90243600,GCST90139437,GCST90245368,GCST90103137,GCST90203237,GCST90201188,GCST90202220,GCST90199773,GCST90299754
http://purl.obolibrary.org/obo/HP_0000958	GCST90084357,GCST90080371
http://www.ebi.ac.uk/efo/EFO_0009176	GCST005927,GCST005924
http://www.ebi.ac.uk/efo/EFO_0010597	GCST90012079,GCST90179370,GCST90274908
http://purl.obolibrary.org/obo/OBA_2041745	GCST90235180
http://www.ebi.ac.uk/efo/EFO_0009177	GCST005715
http://www.ebi.ac.uk/efo/EFO_0021012	GCST90134116,GCST90265810,GCST90243490,GCST90139389,GCST90245369,GCST90202070,GCST90199630,GCST90201030,GCST90203101,GCST90299755
http://www.ebi.ac.uk/efo/EFO_0010598	GCST90012081,GCST90242281,GCST90101425,GCST90237051,GCST90161432,GCST90085765,GCST90179386,GCST90248937,GCST90274909
http://purl.obolibrary.org/obo/OBA_2041746	GCST90235254
http://www.ebi.ac.uk/efo/EFO_0021013	GCST90134118,GCST90176325,GCST90265818,GCST90265819,GCST90243803,GCST90257549,GCST90258154,GCST90140316,GCST90245370,GCST90103138,GCST90202201,GCST90199768,GCST90203246,GCST90201170,GCST90299756
http://www.ebi.ac.uk/efo/EFO_0009178	GCST005713,GCST009517,GCST90101844,GCST90101850,GCST90101856,GCST008497,GCST90297542,GCST90271744,GCST90271745
http://www.ebi.ac.uk/efo/EFO_0010599	GCST90012040,GCST90085774,GCST90085810,GCST90179430,GCST90274911
http://purl.obolibrary.org/obo/OBA_2041747	GCST90235193
http://www.ebi.ac.uk/efo/EFO_0021014	GCST90133798,GCST90264883,GCST90264884,GCST90257498,GCST90243616,GCST90258103,GCST90139500,GCST90102904,GCST90245137,GCST90201432,GCST90200008,GCST90202459,GCST90299947
http://www.ebi.ac.uk/efo/EFO_0009179	GCST005714
http://purl.obolibrary.org/obo/OBA_2041748	GCST90233591
http://www.ebi.ac.uk/efo/EFO_0021015	GCST90133955,GCST90265386,GCST90265387,GCST90257443,GCST90243558,GCST90257515,GCST90258120,GCST90258048,GCST90139416,GCST90103020,GCST90245260,GCST90202131,GCST90199683,GCST90201091,GCST90203163,GCST90299667
http://purl.obolibrary.org/obo/OBA_2041749	GCST90236434
http://www.ebi.ac.uk/efo/EFO_0021016	GCST90133958,GCST90265395,GCST90243588,GCST90139419,GCST90103022,GCST90245263,GCST90202129,GCST90199686,GCST90201096,GCST90203167
http://www.ebi.ac.uk/efo/EFO_0021017	GCST90134225,GCST90266101,GCST90266102,GCST90243875,GCST90139449,GCST90245466,GCST90103227,GCST90201226,GCST90202261,GCST90203276,GCST90199819,GCST90299812
http://www.ebi.ac.uk/efo/EFO_0021018	GCST90133944,GCST90265349,GCST90265350,GCST90257511,GCST90243543,GCST90258116,GCST90139414,GCST90103012,GCST90245248,GCST90202113,GCST90199682,GCST90201080,GCST90203148,GCST90299646
http://purl.obolibrary.org/obo/MONDO_0005178	GCST000421,GCST000923,GCST000558,GCST001516,GCST001592,GCST005811,GCST005814,GCST002410,GCST002155,GCST001209,GCST000869,GCST005225,GCST005228,GCST90038686,GCST90034531,GCST90061030,GCST90061034,GCST90034520,GCST90034524,GCST90034532,GCST90080427,GCST90086113,GCST90086114,GCST90086115,GCST90086116,GCST90086117,GCST007093,GCST90081861,GCST90081862,GCST90077875,GCST90077876,GCST90080417,GCST9008042…
http://www.ebi.ac.uk/efo/EFO_0021019	GCST90243825
http://purl.obolibrary.org/obo/MONDO_0024876	GCST90044566
http://www.ebi.ac.uk/efo/EFO_0801240	GCST90240008
http://www.ebi.ac.uk/efo/EFO_0801241	GCST90240013
http://www.ebi.ac.uk/efo/EFO_0005741	GCST90038676,GCST90078835,GCST90041704,GCST90041776,GCST90082821,GCST90079572,GCST90083558,GCST011593,GCST011591,GCST90270866,GCST90270868,GCST90246019
http://www.ebi.ac.uk/efo/EFO_0801242	GCST90240015
http://www.ebi.ac.uk/efo/EFO_0801243	GCST90240021
http://www.ebi.ac.uk/efo/EFO_0801244	GCST90240022
http://www.ebi.ac.uk/efo/EFO_0801245	GCST90240025
http://www.ebi.ac.uk/efo/EFO_0801246	GCST90240026
http://www.ebi.ac.uk/efo/EFO_0801247	GCST90240027
http://purl.obolibrary.org/obo/HP_0030160	GCST90080643,GCST90084629,GCST90246356,GCST90246191
http://www.ebi.ac.uk/efo/EFO_0801248	GCST90240028
http://www.ebi.ac.uk/efo/EFO_0801249	GCST90240029
http://www.ebi.ac.uk/efo/EFO_1001864	GCST90080658,GCST90084644,GCST90044442,GCST90018937,GCST90018717,GCST90246194
http://www.ebi.ac.uk/efo/EFO_0009631	GCST90082871,GCST90078885,GCST90078884,GCST90082870
http://purl.obolibrary.org/obo/OBA_2040420	GCST90235174
http://www.ebi.ac.uk/efo/EFO_0009632	GCST90085375,GCST90081389
http://purl.obolibrary.org/obo/OBA_2040421	GCST90233183
http://www.ebi.ac.uk/efo/EFO_1001866	GCST90044151,GCST90080226,GCST90080225,GCST90084212,GCST90084211,GCST90027171
http://purl.obolibrary.org/obo/OBA_2040422	GCST90233355
http://www.ebi.ac.uk/efo/EFO_0009635	GCST90244014
http://purl.obolibrary.org/obo/OBA_2040423	GCST90234170
http://www.ebi.ac.uk/efo/EFO_1001869	GCST90018616,GCST90018836
http://purl.obolibrary.org/obo/OBA_2040424	GCST90233536
http://www.ebi.ac.uk/efo/EFO_0009636	GCST007403,GCST007404,GCST007405,GCST90078830,GCST90082816,GCST90018590,GCST90018810,GCST90275370,GCST90275371
http://purl.obolibrary.org/obo/OBA_2040425	GCST90234975
http://www.ebi.ac.uk/efo/EFO_0009637	GCST90044083,GCST90084134,GCST90080148,GCST90246126
http://purl.obolibrary.org/obo/OBA_2040426	GCST90232794
http://purl.obolibrary.org/obo/GO_0014072	GCST002235,GCST001751
http://purl.obolibrary.org/obo/OBA_2040427	GCST90234441,GCST90235036
http://www.ebi.ac.uk/efo/EFO_0009639	GCST90080721,GCST90080722,GCST90084708,GCST90084707,GCST90245831
http://www.ebi.ac.uk/efo/EFO_0000536	GCST90129619,GCST90129624
http://purl.obolibrary.org/obo/OBA_2040428	GCST90234641
http://purl.obolibrary.org/obo/OBA_2040429	GCST90235565
http://www.ebi.ac.uk/efo/EFO_0000537	GCST004889,GCST004384,GCST004388,GCST006229,GCST000041,GCST000799,GCST000398,GCST000849,GCST000973,GCST000361,GCST001405,GCST001085,GCST000447,GCST001238,GCST006023,GCST012577,GCST002627,GCST001423,GCST001467,GCST003276,GCST003613,GCST007707,GCST007610,GCST007611,GCST90038604,GCST90086157,GCST013041,GCST90086088,GCST90086089,GCST90086090,GCST90086091,GCST90086092,GCST90042688,GCST90042675,GCST900…
http://www.ebi.ac.uk/efo/EFO_0000538	GCST001778,GCST011205,GCST011211,GCST012101,GCST012100,GCST012099,GCST90132261,GCST90018641,GCST90018861,GCST90296096
http://purl.obolibrary.org/obo/OBA_2044310	GCST90235494
http://purl.obolibrary.org/obo/OBA_2044311	GCST90233635
http://purl.obolibrary.org/obo/OBA_2044312	GCST90235401
http://www.ebi.ac.uk/efo/EFO_0801700	GCST90241507,GCST90248014
http://purl.obolibrary.org/obo/OBA_2044313	GCST90239501
http://purl.obolibrary.org/obo/OBA_2041290	GCST90233211
http://www.ebi.ac.uk/efo/EFO_0801701	GCST90241508
http://purl.obolibrary.org/obo/OBA_2041291	GCST90238793
http://purl.obolibrary.org/obo/OBA_2044314	GCST90234000
http://www.ebi.ac.uk/efo/EFO_0801702	GCST90241514,GCST90248007
http://purl.obolibrary.org/obo/OBA_2041292	GCST90239355
http://purl.obolibrary.org/obo/OBA_2044315	GCST90234983
http://www.ebi.ac.uk/efo/EFO_0801703	GCST90241518,GCST90248011
http://www.ebi.ac.uk/efo/EFO_0022340	GCST90269685
http://purl.obolibrary.org/obo/OBA_2041293	GCST90233759
http://purl.obolibrary.org/obo/OBA_2044316	GCST90236281
http://www.ebi.ac.uk/efo/EFO_0004424	GCST90104205
http://www.ebi.ac.uk/efo/EFO_0801704	GCST90241524,GCST90241525,GCST90248137
http://www.ebi.ac.uk/efo/EFO_0022341	GCST90269705
http://purl.obolibrary.org/obo/OBA_2044317	GCST90236342
http://purl.obolibrary.org/obo/OBA_2041294	GCST90235682
http://www.ebi.ac.uk/efo/EFO_0801705	GCST90241535,GCST90247968
http://purl.obolibrary.org/obo/OBA_2044318	GCST90236621
http://purl.obolibrary.org/obo/OBA_2041295	GCST90236714
http://www.ebi.ac.uk/efo/EFO_0801706	GCST90241536,GCST90247972
http://purl.obolibrary.org/obo/OBA_2041296	GCST90235659
http://purl.obolibrary.org/obo/OBA_2044319	GCST90233485
http://www.ebi.ac.uk/efo/EFO_0801707	GCST90241537,GCST90248103
http://purl.obolibrary.org/obo/OBA_2041297	GCST90234716
http://www.ebi.ac.uk/efo/EFO_0801708	GCST90241540,GCST90248106
http://purl.obolibrary.org/obo/OBA_2041298	GCST90234002
http://www.ebi.ac.uk/efo/EFO_0801709	GCST90241566
http://purl.obolibrary.org/obo/OBA_2041299	GCST90233316
http://purl.obolibrary.org/obo/HP_0025328	GCST90080719,GCST90080720,GCST90084706,GCST90084705,GCST90245830
http://www.ebi.ac.uk/efo/EFO_0008310	GCST90243183,GCST90101662,GCST90137711,GCST90161568,GCST90249849
http://purl.obolibrary.org/obo/OBA_2045180	GCST90277374,GCST90244327,GCST90244506
http://www.ebi.ac.uk/efo/EFO_0008311	GCST90243184,GCST90101663,GCST90137702,GCST90237815,GCST90162264,GCST90225605,GCST90249989
http://purl.obolibrary.org/obo/OBA_2045181	GCST90277377,GCST90244330,GCST90244509
http://www.ebi.ac.uk/efo/EFO_0008312	GCST90243207,GCST90101676,GCST90237120,GCST90137627,GCST90161510,GCST90225564,GCST90250042
http://purl.obolibrary.org/obo/OBA_2045182	GCST90277376,GCST90244329,GCST90244508
http://www.ebi.ac.uk/efo/EFO_0008313	GCST90243260,GCST90243261,GCST90101693,GCST90234905,GCST90238881,GCST90162148
http://purl.obolibrary.org/obo/OBA_2045183	GCST90277378,GCST90244331,GCST90244510
http://www.ebi.ac.uk/efo/EFO_0008314	GCST90243323,GCST90101701,GCST90237463,GCST90137629,GCST90161877,GCST90225855,GCST90250164,GCST90274917
http://purl.obolibrary.org/obo/OBA_2045184	GCST90277254,GCST90244386,GCST90244207
http://www.ebi.ac.uk/efo/EFO_0008315	GCST90243324,GCST90101702,GCST90234499,GCST90236450,GCST90137634,GCST90161351,GCST90085790,GCST90225804,GCST90225768,GCST90250165
http://purl.obolibrary.org/obo/OBA_2045185	GCST90277253,GCST90244385,GCST90244206
http://www.ebi.ac.uk/efo/EFO_0008316	GCST004644
http://purl.obolibrary.org/obo/OBA_2045186	GCST90277256,GCST90244388,GCST90244209
http://www.ebi.ac.uk/efo/EFO_0008317	GCST005450,GCST005451,GCST005453,GCST005454,GCST005458,GCST005459,GCST005461,GCST005462,GCST005463,GCST005464,GCST005465,GCST005466,GCST005468,GCST005469,GCST005470,GCST005471,GCST005473,GCST005474,GCST005510,GCST005511,GCST90091720,GCST90091721,GCST90091722,GCST90095342,GCST90095343,GCST90095344,GCST90095345,GCST90095346,GCST90095348,GCST90095349,GCST90095350,GCST90095351,GCST90095352,GCST900953…
http://purl.obolibrary.org/obo/OBA_2045187	GCST90277255,GCST90244387,GCST90244208
http://www.ebi.ac.uk/efo/EFO_0008318	GCST90019423,GCST90101704,GCST90237165,GCST90137526,GCST90161556,GCST90225917,GCST90225767,GCST90250174
http://purl.obolibrary.org/obo/OBA_2045188	GCST90277238,GCST90244370,GCST90244191
http://www.ebi.ac.uk/efo/EFO_0008319	GCST90243358,GCST90243359,GCST90101709,GCST90237287,GCST90137837,GCST90233860,GCST90161685,GCST90225895,GCST90225730,GCST90250211
http://purl.obolibrary.org/obo/OBA_2045189	GCST90277239,GCST90244371,GCST90244192
http://www.ebi.ac.uk/efo/EFO_0802580	GCST90241329,GCST90247807
http://www.ebi.ac.uk/efo/EFO_0005297	GCST002160,GCST002159,GCST90044018
http://www.ebi.ac.uk/efo/EFO_0802581	GCST90241356,GCST90247818
http://www.ebi.ac.uk/efo/EFO_0005298	GCST006408,GCST002084,GCST90296334,GCST90296335,GCST90296336,GCST90296337,GCST90296338,GCST90296339,GCST90296340,GCST90296341,GCST90296342,GCST90296343,GCST90296344,GCST90296345,GCST90296346,GCST90296347,GCST90296348,GCST90296349,GCST90296350,GCST90296351,GCST90296352,GCST90296353,GCST90296354,GCST90296355,GCST90296356,GCST90296357,GCST90296358,GCST90296359,GCST90296360,GCST90296361,GCST90296362,…
http://www.ebi.ac.uk/efo/EFO_0802582	GCST90241357,GCST90247821
http://www.ebi.ac.uk/efo/EFO_0005299	GCST002059,GCST007478,GCST90104464,GCST90104465,GCST90104470,GCST90104471,GCST90027034,GCST90027039
http://www.ebi.ac.uk/efo/EFO_0802583	GCST90241358
http://www.ebi.ac.uk/efo/EFO_0802584	GCST90241359,GCST90247827
http://www.ebi.ac.uk/efo/EFO_0802585	GCST90241362,GCST90247831
http://www.ebi.ac.uk/efo/EFO_0009180	GCST005790
http://www.ebi.ac.uk/efo/EFO_0802586	GCST90241363,GCST90247832
http://www.ebi.ac.uk/efo/EFO_0003100	GCST003627,GCST005804,GCST003672,GCST002923,GCST003438,GCST002792,GCST90038643,GCST90081722,GCST90077736,GCST90044616,GCST90308729,GCST003964,GCST010732,GCST008223,GCST90017191,GCST90017192,GCST90017193,GCST90017194,GCST90134249
http://www.ebi.ac.uk/efo/EFO_0009181	GCST90011998,GCST005712,GCST005711,GCST006519,GCST90088672,GCST90241351,GCST90137647,GCST90162057,GCST90085737,GCST90179306,GCST90225820,GCST90225753
http://purl.obolibrary.org/obo/OBA_2041750	GCST90235900
http://www.ebi.ac.uk/efo/EFO_0802587	GCST90241364,GCST90247836
http://purl.obolibrary.org/obo/HP_0000964	GCST90038680,GCST90029017,GCST012462,GCST009718,GCST009717,GCST009716,GCST90079457,GCST90083443,GCST90044763,GCST007075
http://www.ebi.ac.uk/efo/EFO_0009182	GCST90078505,GCST90078509,GCST90078499,GCST90078504,GCST90078498,GCST90078497,GCST90078500,GCST90078501,GCST90042791,GCST90042793,GCST90042794,GCST90042795,GCST90042796,GCST005718,GCST005719,GCST005720,GCST005717,GCST90078507,GCST90078502,GCST90078506,GCST90078508,GCST90082488,GCST90082494,GCST90082493,GCST90082495,GCST90082487,GCST90082490,GCST90082491,GCST90082492,GCST90082485,GCST90082484,GCST…
http://purl.obolibrary.org/obo/OBA_2041751	GCST90235844
http://www.ebi.ac.uk/efo/EFO_0802588	GCST90241365,GCST90247694
http://www.ebi.ac.uk/efo/EFO_0003102	GCST90044537,GCST90044538,GCST90077778,GCST90081763,GCST90081764,GCST90077777,GCST90080564,GCST90084550,GCST90281166
http://www.ebi.ac.uk/efo/EFO_0009183	GCST005751,GCST005755
http://purl.obolibrary.org/obo/OBA_2041752	GCST90234924
http://www.ebi.ac.uk/efo/EFO_0802589	GCST90241367,GCST90247837
http://www.ebi.ac.uk/efo/EFO_0003103	GCST90038630,GCST90044231,GCST90077710,GCST90077711,GCST90081696,GCST90081697,GCST90084597,GCST90080611,GCST90044483,GCST011590,GCST90013890,GCST90013940,GCST90225545,GCST90245827,GCST90281182,GCST90270867
http://www.ebi.ac.uk/efo/EFO_0009184	GCST005787,GCST90079419,GCST90083405,GCST90310239,GCST005845,GCST90093319,GCST90093320,GCST90093321
http://purl.obolibrary.org/obo/OBA_2041753	GCST90236861
http://www.ebi.ac.uk/efo/EFO_0021020	GCST90133687,GCST90264553,GCST90264554,GCST90243532,GCST90139412,GCST90245037,GCST90102812,GCST90202111,GCST90199677,GCST90201079,GCST90203146,GCST90299699
http://purl.obolibrary.org/obo/MONDO_0005180	GCST000528,GCST000772,GCST000005,GCST000002,GCST000530,GCST000261,GCST000567,GCST000950,GCST001126,GCST001430,GCST000874,GCST000959,GCST001546,GCST001445,GCST000855,GCST001205,GCST003600,GCST005548,GCST002353,GCST001617,GCST002077,GCST001189,GCST002544,GCST002455,GCST003059,GCST002778,GCST004902,GCST012431,GCST90000014,GCST90043734,GCST90042681,GCST90042694,GCST90042668,GCST009325,GCST009324,GCST…
http://www.ebi.ac.uk/efo/EFO_0009185	GCST005788,GCST005850,GCST005849,GCST005848,GCST005846,GCST005847,GCST90134618
http://purl.obolibrary.org/obo/OBA_2041754	GCST90233026
http://www.ebi.ac.uk/efo/EFO_0021021	GCST90133688,GCST90264555,GCST90264556,GCST90243485,GCST90139391,GCST90245038,GCST90102813,GCST90202066,GCST90199631,GCST90201024,GCST90203114,GCST90299701
http://www.ebi.ac.uk/efo/EFO_0009187	GCST90257015,GCST90257019,GCST90257022,GCST90257023,GCST90281200
http://purl.obolibrary.org/obo/OBA_2041755	GCST90234124
http://www.ebi.ac.uk/efo/EFO_0021022	GCST90133715,GCST90264649,GCST90264650,GCST90243541,GCST90139404,GCST90245066,GCST90102835,GCST90202089,GCST90199655,GCST90201048,GCST90203134,GCST90299700
http://www.ebi.ac.uk/efo/EFO_0003106	GCST002725,GCST90038665,GCST90027159,GCST90134363,GCST90044067,GCST011104,GCST90081805,GCST90081806,GCST90077819,GCST90077820,GCST90080096,GCST90080098,GCST90080097,GCST90084084,GCST90084082,GCST90084083,GCST90027247,GCST90027252,GCST90027257,GCST90027262,GCST011597,GCST011596,GCST011592,GCST90225541,GCST90276151,GCST90018681,GCST90018901,GCST90104347,GCST90246112,GCST90281167,GCST90281168,GCST90…
http://www.ebi.ac.uk/efo/EFO_0021023	GCST90265402,GCST90265403,GCST90243691,GCST90128895,GCST90139418,GCST90103023,GCST90245266,GCST90202128,GCST90199698,GCST90201095,GCST90203170,GCST90299673
http://purl.obolibrary.org/obo/OBA_2041756	GCST90239091
http://www.ebi.ac.uk/efo/EFO_0009188	GCST90082972,GCST90078986,GCST90297351,GCST90297307,GCST90297439,GCST90297395,GCST90297483,GCST90297527,GCST90134686,GCST90134687,GCST90012734,GCST90012735,GCST90309868
http://www.ebi.ac.uk/efo/EFO_0021024	GCST90265441,GCST90265442,GCST90243545,GCST90140665,GCST90300082
http://purl.obolibrary.org/obo/OBA_2041757	GCST90234093
http://purl.obolibrary.org/obo/MONDO_0005184	GCST90026648,GCST90296102
http://www.ebi.ac.uk/efo/EFO_0003108	GCST000329,GCST001590,GCST003762,GCST90101814
http://purl.obolibrary.org/obo/MONDO_0024880	GCST90043947,GCST90043948
http://www.ebi.ac.uk/efo/EFO_0009189	GCST006897,GCST90038636,GCST90043625,GCST90081714,GCST90081715,GCST90077728,GCST90077729,GCST90054803,GCST90103389,GCST90018640,GCST90018860
http://purl.obolibrary.org/obo/OBA_2041758	GCST90232951
http://www.ebi.ac.uk/efo/EFO_0021025	GCST90133871,GCST90265088,GCST90265089,GCST90257426,GCST90243696,GCST90258031,GCST90139614,GCST90245188,GCST90102954,GCST90202187,GCST90199746,GCST90201154,GCST90203203,GCST90299600
http://www.ebi.ac.uk/efo/EFO_0021026	GCST90243564
http://purl.obolibrary.org/obo/OBA_2041759	GCST90237995
http://purl.obolibrary.org/obo/MONDO_0009061	GCST001077,GCST000346,GCST002025
http://www.ebi.ac.uk/efo/EFO_0021027	GCST90265477,GCST90265478,GCST90243478,GCST90139615,GCST90103047,GCST90245287,GCST90299691
http://www.ebi.ac.uk/efo/EFO_0021028	GCST90264313,GCST90243533,GCST90299839
http://www.ebi.ac.uk/efo/EFO_0021029	GCST90133904,GCST90265259,GCST90265260,GCST90257434,GCST90243443,GCST90258039,GCST90139621,GCST90134448,GCST90245221,GCST90102988,GCST90201707,GCST90202724,GCST90200290,GCST90203723,GCST90299620
http://www.ebi.ac.uk/efo/EFO_0801250	GCST90240030
http://www.ebi.ac.uk/efo/EFO_0801251	GCST90240031
http://www.ebi.ac.uk/efo/EFO_0801252	GCST90240032
http://www.ebi.ac.uk/efo/EFO_0801253	GCST90240033
http://www.ebi.ac.uk/efo/EFO_0801254	GCST90240034
http://www.ebi.ac.uk/efo/EFO_0801255	GCST90240035
http://www.ebi.ac.uk/efo/EFO_0005755	GCST90080543,GCST90080542,GCST90079960,GCST90079958,GCST90079959,GCST90083944,GCST90083945,GCST90083946,GCST90084529,GCST90084528,GCST90044571
http://www.ebi.ac.uk/efo/EFO_0801256	GCST90240036
http://purl.obolibrary.org/obo/MONDO_0001751	GCST90084292,GCST90080306
http://www.ebi.ac.uk/efo/EFO_0801257	GCST90240037
http://www.ebi.ac.uk/efo/EFO_0005757	GCST90080647,GCST90084633
http://www.ebi.ac.uk/efo/EFO_0801258	GCST90240038
http://www.ebi.ac.uk/efo/EFO_0801259	GCST90240039
http://www.ebi.ac.uk/efo/EFO_1001870	GCST005549,GCST003815,GCST006806,GCST90044699,GCST013197,GCST013196,GCST012976,GCST90026599,GCST90026600,GCST90026601,GCST007511
http://www.ebi.ac.uk/efo/EFO_1001872	GCST90078641,GCST90082627
http://www.ebi.ac.uk/efo/EFO_0009640	GCST90082246,GCST90082245,GCST90082277,GCST90082278,GCST90082273,GCST90082242,GCST90082261,GCST90082262,GCST90082260,GCST90085320,GCST90085315,GCST90085316,GCST90085317,GCST90085318,GCST90085319,GCST90078275,GCST90078276,GCST90078274,GCST90081330,GCST90078259,GCST90078256,GCST90078260,GCST90081329,GCST90081332,GCST90078291,GCST90078292,GCST90081334,GCST90081331,GCST90081333,GCST90078287
http://www.ebi.ac.uk/efo/EFO_0009641	GCST90080878,GCST90084860,GCST90084864,GCST90080874,GCST90044631
http://purl.obolibrary.org/obo/OBA_2040431	GCST90233324
http://www.ebi.ac.uk/efo/EFO_1000096	GCST90102502,GCST90102503,GCST90102506,GCST90102507
http://purl.obolibrary.org/obo/OBA_2040432	GCST90235152
http://www.ebi.ac.uk/efo/EFO_0000540	GCST000987,GCST001611,GCST90038603
http://purl.obolibrary.org/obo/OBA_2040433	GCST90234688
http://purl.obolibrary.org/obo/OBA_2040434	GCST90236892
http://purl.obolibrary.org/obo/OBA_2040435	GCST90234717
http://www.ebi.ac.uk/efo/EFO_0000544	GCST90276152
http://purl.obolibrary.org/obo/OBA_2040436	GCST90235040
http://purl.obolibrary.org/obo/OBA_2040437	GCST90235976
http://purl.obolibrary.org/obo/OBA_2040438	GCST90234582
http://www.ebi.ac.uk/efo/EFO_0000546	GCST90038667,GCST90038601,GCST90081047,GCST90079432,GCST90041750,GCST90041723,GCST90042808,GCST90042811,GCST90044319,GCST90084978,GCST90084983,GCST90084979,GCST90084980,GCST90084981,GCST90084982,GCST90084985,GCST90084984,GCST90084987,GCST90085010,GCST90085009,GCST90085012,GCST90085011,GCST90085013,GCST90085016,GCST90085019,GCST90085018,GCST90085022,GCST90085021,GCST90084969,GCST90084986,GCST90084…
http://purl.obolibrary.org/obo/OBA_2040439	GCST90234556
http://purl.obolibrary.org/obo/OBA_2044320	GCST90236247,GCST90236285
http://purl.obolibrary.org/obo/OBA_2044321	GCST90236082,GCST90236192
http://purl.obolibrary.org/obo/OBA_2044322	GCST90238870
http://www.ebi.ac.uk/efo/EFO_0801710	GCST90241571,GCST90247987
http://www.ebi.ac.uk/efo/EFO_0801711	GCST90241575,GCST90241576,GCST90248049
http://purl.obolibrary.org/obo/OBA_2044324	GCST90238857
http://www.ebi.ac.uk/efo/EFO_0801712	GCST90241577,GCST90248050
http://purl.obolibrary.org/obo/OBA_2044325	GCST90234900
http://www.ebi.ac.uk/efo/EFO_0801713	GCST90241581,GCST90248051
http://purl.obolibrary.org/obo/OBA_2044326	GCST90236904
http://www.ebi.ac.uk/efo/EFO_0801714	GCST90241582,GCST90248052
http://purl.obolibrary.org/obo/OBA_2044327	GCST90235128
http://www.ebi.ac.uk/efo/EFO_0801715	GCST90241590,GCST90248031
http://purl.obolibrary.org/obo/OBA_2044328	GCST90235816
http://www.ebi.ac.uk/efo/EFO_0801716	GCST90241594,GCST90241595,GCST90274800,GCST90248035
http://purl.obolibrary.org/obo/OBA_2044329	GCST90239330
http://www.ebi.ac.uk/efo/EFO_0801717	GCST90241596,GCST90248036
http://www.ebi.ac.uk/efo/EFO_0801718	GCST90241597,GCST90248041
http://www.ebi.ac.uk/efo/EFO_0801719	GCST90241598,GCST90248042
http://purl.obolibrary.org/obo/HP_0004398	GCST90086123,GCST90086124,GCST90086125,GCST90086126,GCST90086127,GCST90044133,GCST90084186,GCST90080200,GCST90239640,GCST90246133
http://www.ebi.ac.uk/efo/EFO_0008320	GCST009206,GCST009254,GCST90103382
http://purl.obolibrary.org/obo/OBA_2045190	GCST90277241,GCST90244373,GCST90244194
http://www.ebi.ac.uk/efo/EFO_0008321	GCST90243362,GCST90101711,GCST90234033,GCST90137697,GCST90161617,GCST90250213
http://purl.obolibrary.org/obo/OBA_2045191	GCST90277240,GCST90244372,GCST90244193
http://www.ebi.ac.uk/efo/EFO_0008322	GCST004689,GCST004690,GCST011663,GCST011664
http://purl.obolibrary.org/obo/OBA_2045192	GCST90277242,GCST90244374,GCST90244195
http://purl.obolibrary.org/obo/OBA_2045193	GCST90277247,GCST90244379,GCST90244200
http://purl.obolibrary.org/obo/OBA_2045194	GCST90277246,GCST90244378,GCST90244199
http://purl.obolibrary.org/obo/OBA_2045195	GCST90277245,GCST90244377,GCST90244198
http://www.ebi.ac.uk/efo/EFO_0008326	GCST90088240,GCST90240165,GCST90100612,GCST90237246,GCST90137688,GCST90161643,GCST90225923,GCST90246431
http://purl.obolibrary.org/obo/OBA_2045196	GCST90277244,GCST90244376,GCST90244197
http://www.ebi.ac.uk/efo/EFO_0008327	GCST90100636,GCST90237430,GCST90137532,GCST90161838,GCST90012603,GCST90246390
http://purl.obolibrary.org/obo/OBA_2045197	GCST90277251,GCST90244383,GCST90244204
http://www.ebi.ac.uk/efo/EFO_0008328	GCST004697,GCST007565,GCST007576,GCST90029029,GCST010981,GCST90077574,GCST90077575,GCST90077573,GCST90077576,GCST90081562,GCST90081560,GCST90081561,GCST90081559,GCST011658,GCST007983,GCST007986,GCST007083,GCST010576,GCST010575,GCST010574,GCST012037,GCST012036,GCST90103352,GCST90267308,GCST90267309,GCST90267310
http://purl.obolibrary.org/obo/OBA_2045198	GCST90277250,GCST90244382,GCST90244203
http://www.ebi.ac.uk/efo/EFO_0008329	GCST004727,GCST004729,GCST004730,GCST004728,GCST004731,GCST010093,GCST010094,GCST010095
http://purl.obolibrary.org/obo/OBA_2045199	GCST90277249,GCST90244381,GCST90244202
http://www.ebi.ac.uk/efo/EFO_0802590	GCST90241381
http://www.ebi.ac.uk/efo/EFO_0802591	GCST90241385,GCST90241386,GCST90247867
http://www.ebi.ac.uk/efo/EFO_0802592	GCST90241388,GCST90247949
http://www.ebi.ac.uk/efo/EFO_0802593	GCST90241389,GCST90247950
http://purl.obolibrary.org/obo/OBA_2043000	GCST90236111
http://www.ebi.ac.uk/efo/EFO_0802594	GCST90241391
http://purl.obolibrary.org/obo/OBA_2043001	GCST90235095
http://www.ebi.ac.uk/efo/EFO_0802595	GCST90241399
http://www.ebi.ac.uk/efo/EFO_0009190	GCST90043625,GCST90081714,GCST90081715,GCST90077728,GCST90077729,GCST90079727,GCST90083716,GCST90083713,GCST90083715,GCST90083714,GCST90079729,GCST90079728,GCST90079730,GCST90246051
http://purl.obolibrary.org/obo/OBA_2043002	GCST90234752
http://www.ebi.ac.uk/efo/EFO_0802596	GCST90241400
http://purl.obolibrary.org/obo/OBA_2043003	GCST90235122,GCST90179394
http://purl.obolibrary.org/obo/OBA_2041760	GCST90232962
http://www.ebi.ac.uk/efo/EFO_0802597	GCST90241404,GCST90247925
http://purl.obolibrary.org/obo/OBA_2041761	GCST90235134
http://purl.obolibrary.org/obo/OBA_2043004	GCST90233678
http://www.ebi.ac.uk/efo/EFO_0802598	GCST90241418,GCST90247843
http://purl.obolibrary.org/obo/HP_0000975	GCST90044531,GCST006090,GCST90084878,GCST90084877,GCST90080892,GCST90080891
http://purl.obolibrary.org/obo/OBA_2043005	GCST90233788
http://purl.obolibrary.org/obo/OBA_2041762	GCST90234712,GCST90239135
http://www.ebi.ac.uk/efo/EFO_0802599	GCST90241421,GCST90247900
http://purl.obolibrary.org/obo/OBA_2041763	GCST90236722
http://purl.obolibrary.org/obo/OBA_2043006	GCST90235953
http://www.ebi.ac.uk/efo/EFO_0021030	GCST90133773,GCST90264815,GCST90264816,GCST90243412,GCST90139630,GCST90299538
http://www.ebi.ac.uk/efo/EFO_0021031	GCST90243842,GCST90257474,GCST90258079,GCST90299802
http://purl.obolibrary.org/obo/OBA_2043007	GCST90233574
http://purl.obolibrary.org/obo/OBA_2041764	GCST90236415
http://purl.obolibrary.org/obo/HP_0000978	GCST90044678
http://purl.obolibrary.org/obo/HP_0003073	GCST012007
http://purl.obolibrary.org/obo/HP_0000979	GCST90256695
http://purl.obolibrary.org/obo/OBA_2041765	GCST90238569
http://purl.obolibrary.org/obo/OBA_2043008	GCST90234015
http://www.ebi.ac.uk/efo/EFO_0021032	GCST90134214,GCST90266068,GCST90266069,GCST90257426,GCST90243566,GCST90258031,GCST90139634,GCST90245455,GCST90103216,GCST90202123,GCST90199687,GCST90201088,GCST90203153,GCST90299803
http://purl.obolibrary.org/obo/HP_0003074	GCST90084891,GCST90080905,GCST90032675
http://purl.obolibrary.org/obo/OBA_2041766	GCST90238638
http://purl.obolibrary.org/obo/OBA_2043009	GCST90236719
http://www.ebi.ac.uk/efo/EFO_0021033	GCST90133797,GCST90176159,GCST90264873,GCST90257495,GCST90243459,GCST90280571,GCST90128876,GCST90258100,GCST90267456,GCST90267457,GCST90139667,GCST90134443,GCST90245128,GCST90102893,GCST90201772,GCST90203796,GCST90202791,GCST90200706,GCST90299554
http://www.ebi.ac.uk/efo/EFO_0000094	GCST005965,GCST005966,GCST005967,GCST005968,GCST005969,GCST005970,GCST005971,GCST005972,GCST003798,GCST009638,GCST009637,GCST009636,GCST002158,GCST005832
http://purl.obolibrary.org/obo/OBA_2041767	GCST90234898,GCST90236528
http://www.ebi.ac.uk/efo/EFO_0021034	GCST90134111,GCST90129191,GCST90176324,GCST90265795,GCST90265796,GCST90257457,GCST90243438,GCST90257548,GCST90258153,GCST90258062,GCST90139662,GCST90245364,GCST90103133,GCST90201671,GCST90200279,GCST90203719,GCST90202723,GCST90299749
http://www.ebi.ac.uk/efo/EFO_0000095	GCST001570,GCST000224,GCST000906,GCST002073,GCST002299,GCST90079124,GCST90083110,GCST90041912,GCST90042757,GCST90043911,GCST008721,GCST008724,GCST008727,GCST90079641,GCST90083627,GCST003468,GCST004146,GCST004099,GCST012155,GCST90027053,GCST90267402
http://purl.obolibrary.org/obo/HP_0003076	GCST008605,GCST008606,GCST008614,GCST010720,GCST010719,GCST010718
http://www.ebi.ac.uk/efo/EFO_0021035	GCST90243480
http://purl.obolibrary.org/obo/OBA_2041768	GCST90239000
http://www.ebi.ac.uk/efo/EFO_0000096	GCST000734,GCST000448,GCST001051,GCST002643
http://purl.obolibrary.org/obo/OBA_2041769	GCST90235049
http://www.ebi.ac.uk/efo/EFO_0021036	GCST90134208,GCST90266046,GCST90266047,GCST90243872,GCST90139796,GCST90245450,GCST90103210,GCST90201220,GCST90202249,GCST90199809,GCST90299798
http://www.ebi.ac.uk/efo/EFO_0021037	GCST90243614,GCST90267437
http://www.ebi.ac.uk/efo/EFO_0021038	GCST90176193,GCST90264748,GCST90264749,GCST90243576,GCST90240001,GCST90134382,GCST90128880,GCST90129003,GCST90139704,GCST90102860,GCST90245096,GCST90202103,GCST90199669,GCST90201064,GCST90203137,GCST90299518
http://www.ebi.ac.uk/efo/EFO_0007000	GCST90093062,GCST002886
http://www.ebi.ac.uk/efo/EFO_0021039	GCST90176161,GCST90264997,GCST90264998,GCST90243737,GCST90239992,GCST90134372,GCST90128879,GCST90129002,GCST90139736,GCST90102928,GCST90245164,GCST90202157,GCST90199722,GCST90201130,GCST90203183,GCST90299578
http://www.ebi.ac.uk/efo/EFO_0007001	GCST004941,GCST005274,GCST008883,GCST90093090,GCST90093091,GCST90093092,GCST90265002,GCST90265003,GCST90139703,GCST90199673,GCST90201070
http://www.ebi.ac.uk/efo/EFO_0007002	GCST005269,GCST010262,GCST010261,GCST010260,GCST90241825,GCST90101269,GCST90237162,GCST90137560,GCST90012687,GCST90161554,GCST90225903,GCST90225743,GCST90248348
http://www.ebi.ac.uk/efo/EFO_0801260	GCST90240040
http://www.ebi.ac.uk/efo/EFO_0007003	GCST90012030,GCST90242388,GCST90101444,GCST90236971,GCST90233041,GCST90161380,GCST90012722
http://www.ebi.ac.uk/efo/EFO_0005760	GCST009650,GCST90104261,GCST002485,GCST90103746
http://www.ebi.ac.uk/efo/EFO_0801261	GCST90240041
http://www.ebi.ac.uk/efo/EFO_0007004	GCST008885,GCST90094671,GCST90094672,GCST90094673,GCST90102113
http://www.ebi.ac.uk/efo/EFO_0005761	GCST002479,GCST012003,GCST90244184
http://www.ebi.ac.uk/efo/EFO_0007005	GCST90239823,GCST90239824
http://www.ebi.ac.uk/efo/EFO_0801262	GCST90240042
http://www.ebi.ac.uk/efo/EFO_0005762	GCST003963,GCST003063,GCST90095046,GCST002507,GCST005934
http://www.ebi.ac.uk/efo/EFO_0801263	GCST90240043
http://www.ebi.ac.uk/efo/EFO_0007006	GCST005323,GCST005324,GCST003824,GCST004024,GCST003769,GCST003667,GCST003669,GCST003668,GCST002755,GCST006631,GCST90078455,GCST90078452,GCST90078454,GCST90078451,GCST90078453,GCST90078463,GCST90078464,GCST90078462,GCST90082441,GCST90079211,GCST90042782,GCST90044036,GCST007666,GCST008840,GCST008841,GCST008842,GCST008843,GCST008844,GCST008845,GCST008846,GCST008849,GCST008848,GCST008850,GCST008851,G…
http://www.ebi.ac.uk/efo/EFO_0005763	GCST004892,GCST004775,GCST004387,GCST004388,GCST006230,GCST006022,GCST006009,GCST002310,GCST002470,GCST003274,GCST006117,GCST006118,GCST005201,GCST007705,GCST007269,GCST007272,GCST006168,GCST006171,GCST006629,GCST006626,GCST90058962,GCST004278,GCST004260,GCST004205,GCST007096,GCST007097,GCST008673,GCST011762,GCST010420,GCST010419,GCST011062,GCST011059,GCST011056,GCST90018970,GCST90134636,GCST9001…
http://www.ebi.ac.uk/efo/EFO_0801264	GCST90240044
http://www.ebi.ac.uk/efo/EFO_0007007	GCST002882
http://www.ebi.ac.uk/efo/EFO_0801265	GCST90240045
http://www.ebi.ac.uk/efo/EFO_0801266	GCST90240046
http://www.ebi.ac.uk/efo/EFO_0007009	GCST003591,GCST005084,GCST005188,GCST007739,GCST008516,GCST008518,GCST008519,GCST011355,GCST90100219,GCST90026491,GCST90090981,GCST90090982,GCST007452,GCST007451,GCST90246327,GCST90255688,GCST90255689,GCST90255690,GCST90269962,GCST90269963,GCST90269964,GCST90269965
http://www.ebi.ac.uk/efo/EFO_0005766	GCST002484,GCST003418
http://www.ebi.ac.uk/efo/EFO_0801267	GCST90240047
http://www.ebi.ac.uk/efo/EFO_0005767	GCST003330,GCST002489,GCST90256777,GCST90256778,GCST90256779,GCST90256780,GCST90256781,GCST90256962,GCST90256963,GCST90256964,GCST90256965,GCST90256966
http://www.ebi.ac.uk/efo/EFO_0801268	GCST90240048
http://www.ebi.ac.uk/efo/EFO_0005768	GCST002473
http://www.ebi.ac.uk/efo/EFO_0801269	GCST90240049
http://www.ebi.ac.uk/efo/EFO_0005769	GCST90079771,GCST90083757
http://purl.obolibrary.org/obo/OBA_2040440	GCST90238592,GCST90238589,GCST90238590
http://purl.obolibrary.org/obo/OBA_2040441	GCST90233801
http://purl.obolibrary.org/obo/OBA_2040442	GCST90234751
http://purl.obolibrary.org/obo/OBA_2040443	GCST90234642
http://www.ebi.ac.uk/efo/EFO_0000551	GCST90043996,GCST90080032,GCST90084018,GCST90044648,GCST90246097
http://purl.obolibrary.org/obo/OBA_2040444	GCST90233520
http://purl.obolibrary.org/obo/OBA_2040445	GCST90233921
http://www.ebi.ac.uk/efo/EFO_0000553	GCST002266
http://www.ebi.ac.uk/efo/EFO_0009657	GCST90080087,GCST90044040,GCST90084073,GCST90084072,GCST90080086,GCST90246106
http://purl.obolibrary.org/obo/OBA_2040446	GCST90233186
http://www.ebi.ac.uk/efo/EFO_0009658	GCST009028,GCST90041721,GCST90044298,GCST008379,GCST90085048,GCST90085052,GCST90085051,GCST90085050,GCST90085053,GCST90085054,GCST90085055,GCST90085063,GCST90085062,GCST90085069,GCST90085064,GCST90085065,GCST90085066,GCST90085068,GCST90085067,GCST90085073,GCST90085070,GCST90085071,GCST90085072,GCST90085056,GCST90085057,GCST90085058,GCST90085059,GCST90085061,GCST90085060,GCST90085074,GCST90085078,…
http://www.ebi.ac.uk/efo/EFO_0009659	GCST90297741,GCST90297692,GCST90297587,GCST90297641
http://purl.obolibrary.org/obo/OBA_2040447	GCST90239395
http://www.ebi.ac.uk/efo/EFO_0000555	GCST002629,GCST002436,GCST90038626,GCST90078833,GCST90078834,GCST90086103,GCST90086104,GCST90086105,GCST90086106,GCST90086107,GCST90044173,GCST006304,GCST90081685,GCST90081686,GCST90082819,GCST90082820,GCST90077699,GCST90077700,GCST90084237,GCST90080250,GCST90080251,GCST90084238,GCST90084236,GCST90080252,GCST90016564,GCST011502,GCST006535,GCST90269915,GCST90129446,GCST90277988,GCST90239641,GCST90…
http://purl.obolibrary.org/obo/OBA_2040448	GCST90234532
http://purl.obolibrary.org/obo/OBA_2040449	GCST90233447
http://www.ebi.ac.uk/efo/EFO_0000557	GCST006053,GCST90162630,GCST90162637,GCST90270219
http://purl.obolibrary.org/obo/OBA_2044330	GCST90232916
http://purl.obolibrary.org/obo/OBA_2044331	GCST90235697
http://purl.obolibrary.org/obo/OBA_2044332	GCST90233903
http://www.ebi.ac.uk/efo/EFO_0801720	GCST90241600,GCST90248043
http://purl.obolibrary.org/obo/OBA_2044333	GCST90234074,GCST90239176,GCST90239568
http://www.ebi.ac.uk/efo/EFO_0801721	GCST90241607,GCST90241608,GCST90274804,GCST90248044
http://purl.obolibrary.org/obo/OBA_2044334	GCST90236752
http://www.ebi.ac.uk/efo/EFO_0801722	GCST90241610,GCST90248046
http://purl.obolibrary.org/obo/OBA_2044335	GCST90234114
http://www.ebi.ac.uk/efo/EFO_0801723	GCST90241611,GCST90274806
http://purl.obolibrary.org/obo/OBA_2044336	GCST90234377
http://www.ebi.ac.uk/efo/EFO_0801724	GCST90241615,GCST90248057
http://purl.obolibrary.org/obo/OBA_2044337	GCST90236932
http://www.ebi.ac.uk/efo/EFO_0801725	GCST90241623,GCST90248062
http://purl.obolibrary.org/obo/OBA_2044338	GCST90234286
http://www.ebi.ac.uk/efo/EFO_0801726	GCST90241625,GCST90248063
http://purl.obolibrary.org/obo/OBA_2044339	GCST90233428
http://www.ebi.ac.uk/efo/EFO_0801727	GCST90241627,GCST90248067
http://www.ebi.ac.uk/efo/EFO_0801728	GCST90241631,GCST90248069
http://www.ebi.ac.uk/efo/EFO_0801729	GCST90241641,GCST90241642,GCST90274814
http://www.ebi.ac.uk/efo/EFO_0008330	GCST004706
http://www.ebi.ac.uk/efo/EFO_0008331	GCST90088221,GCST004455,GCST90101189,GCST90137558,GCST90161625
http://purl.obolibrary.org/obo/OBA_2040900	GCST90233703
http://www.ebi.ac.uk/efo/EFO_0008332	GCST004454
http://purl.obolibrary.org/obo/OBA_2040901	GCST90234186
http://www.ebi.ac.uk/efo/EFO_0008333	GCST005135,GCST005136,GCST005138,GCST005139
http://www.ebi.ac.uk/efo/EFO_1000566	GCST004713,GCST004635,GCST003247,GCST003246,GCST002855
http://purl.obolibrary.org/obo/OBA_2040902	GCST90238075
http://www.ebi.ac.uk/efo/EFO_0008334	GCST005134,GCST005136,GCST005138,GCST005139
http://purl.obolibrary.org/obo/OBA_2040903	GCST90232933,GCST90239048
http://www.ebi.ac.uk/efo/EFO_0008335	GCST005140,GCST005136,GCST005138,GCST005139
http://purl.obolibrary.org/obo/OBA_2040904	GCST90234557
http://www.ebi.ac.uk/efo/EFO_0008336	GCST005359,GCST005360,GCST005358,GCST009144,GCST004691,GCST004981,GCST004998,GCST008216,GCST008219,GCST008220,GCST008221,GCST007358,GCST006286,GCST009999,GCST011823,GCST012255,GCST90096811,GCST009417,GCST007434,GCST007550,GCST008274,GCST007497,GCST007498,GCST007499,GCST011038,GCST011037,GCST011039,GCST90270129,GCST90244572,GCST90321081,GCST90321082,GCST90321083
http://purl.obolibrary.org/obo/OBA_2040905	GCST90233157
http://www.ebi.ac.uk/efo/EFO_0008337	GCST004678,GCST004685,GCST004680,GCST004686,GCST004679,GCST004687,GCST004681,GCST004682,GCST004688,GCST004683,GCST004684
http://purl.obolibrary.org/obo/OBA_2040906	GCST90235208
http://www.ebi.ac.uk/efo/EFO_0008338	GCST004709
http://purl.obolibrary.org/obo/OBA_2040907	GCST90233734
http://www.ebi.ac.uk/efo/EFO_0008339	GCST004707
http://purl.obolibrary.org/obo/OBA_2040908	GCST90239362
http://purl.obolibrary.org/obo/OBA_2040909	GCST90238998
http://purl.obolibrary.org/obo/OBA_2043010	GCST90233988
http://purl.obolibrary.org/obo/OBA_2043011	GCST90235984
http://www.ebi.ac.uk/efo/EFO_0800400	GCST90265780,GCST90139957,GCST90245359,GCST90103124,GCST90201448,GCST90203486,GCST90200035,GCST90202483,GCST90300430
http://purl.obolibrary.org/obo/OBA_2043012	GCST90235030
http://www.ebi.ac.uk/efo/EFO_0800401	GCST90266092,GCST90139958,GCST90103222,GCST90201458,GCST90203489,GCST90200034,GCST90202473,GCST90300479
http://purl.obolibrary.org/obo/OBA_2043013	GCST90236112
http://purl.obolibrary.org/obo/OBA_2041770	GCST90234035,GCST90233053
http://www.ebi.ac.uk/efo/EFO_0800402	GCST90139961,GCST90244970,GCST90102753,GCST90201452,GCST90203487,GCST90200039,GCST90300468
http://purl.obolibrary.org/obo/OBA_2043014	GCST90239265
http://purl.obolibrary.org/obo/OBA_2041771	GCST90238249
http://www.ebi.ac.uk/efo/EFO_0800403	GCST90264284,GCST90139962,GCST90244962,GCST90102744,GCST90201451,GCST90203491,GCST90200045,GCST90202489,GCST90300465
http://purl.obolibrary.org/obo/OBA_2041772	GCST90236737
http://purl.obolibrary.org/obo/OBA_2043015	GCST90233246
http://www.ebi.ac.uk/efo/EFO_0800404	GCST90264288,GCST90264289,GCST90139963,GCST90244969,GCST90102752,GCST90201460,GCST90203503,GCST90200037,GCST90202491,GCST90300467
http://www.ebi.ac.uk/efo/EFO_0021040	GCST90176241,GCST90265331,GCST90265332,GCST90243580,GCST90134373,GCST90128883,GCST90129006,GCST90139702,GCST90245243,GCST90103008,GCST90202100,GCST90199668,GCST90201068,GCST90203136,GCST90299641
http://purl.obolibrary.org/obo/OBA_2043016	GCST90236995
http://purl.obolibrary.org/obo/OBA_2041773	GCST90234540
http://www.ebi.ac.uk/efo/EFO_0800405	GCST90139964,GCST90244927
http://www.ebi.ac.uk/efo/EFO_0021041	GCST90265436,GCST90265437,GCST90243794,GCST90129017,GCST90128974,GCST90139752,GCST90103033,GCST90245278,GCST90202188,GCST90199750,GCST90203216,GCST90201142,GCST90299681
http://purl.obolibrary.org/obo/OBA_2041774	GCST90233771
http://purl.obolibrary.org/obo/OBA_2043017	GCST90233312,GCST90234312
http://www.ebi.ac.uk/efo/EFO_0800406	GCST90264273,GCST90139965,GCST90201453,GCST90203501,GCST90200038,GCST90202492
http://purl.obolibrary.org/obo/OBA_2041775	GCST90235050
http://www.ebi.ac.uk/efo/EFO_0021042	GCST90176243,GCST90265742,GCST90265743,GCST90243734,GCST90240006,GCST90134374,GCST90128884,GCST90129007,GCST90139734,GCST90245345,GCST90103104,GCST90202155,GCST90199720,GCST90201128,GCST90203194,GCST90299731
http://purl.obolibrary.org/obo/OBA_2043018	GCST90238056
http://purl.obolibrary.org/obo/HP_0000989	GCST90044519,GCST90080342,GCST90084329,GCST90084330,GCST90084328,GCST90080344,GCST90080343,GCST009549
http://www.ebi.ac.uk/efo/EFO_0800407	GCST90264262,GCST90139966,GCST90244939,GCST90201455,GCST90203495,GCST90200051,GCST90202496,GCST90300500
http://purl.obolibrary.org/obo/OBA_2043019	GCST90233684
http://purl.obolibrary.org/obo/OBA_2041776	GCST90232985,GCST90179218
http://www.ebi.ac.uk/efo/EFO_0021043	GCST90134089,GCST90265753,GCST90243807,GCST90128981,GCST90129024,GCST90139761,GCST90245349,GCST90103108,GCST90203240,GCST90201184,GCST90202222,GCST90199774
http://www.ebi.ac.uk/efo/EFO_0800408	GCST90139967,GCST90244942,GCST90102719
http://purl.obolibrary.org/obo/OBA_2041777	GCST90235675
http://www.ebi.ac.uk/efo/EFO_0021044	GCST90134109,GCST90176170,GCST90265790,GCST90243546,GCST90129034,GCST90267498,GCST90128991,GCST90139701,GCST90245362,GCST90103127,GCST90202101,GCST90199666,GCST90201065,GCST90203141,GCST90299743
http://www.ebi.ac.uk/efo/EFO_0004908	GCST005074,GCST005272,GCST001555,GCST001762,GCST008884,GCST001653,GCST002195,GCST90083028,GCST90094683,GCST90094684,GCST90094685,GCST90012102,GCST90012103,GCST90012104,GCST90012112,GCST90012113,GCST90012114,GCST90079042,GCST90019520,GCST90104272,GCST90104276,GCST90104280,GCST90104284,GCST90104288,GCST90104292,GCST90104296,GCST011519,GCST011518,GCST90026655,GCST011153,GCST011152,GCST011151,GCST011…
http://www.ebi.ac.uk/efo/EFO_0800409	GCST90264260,GCST90139968,GCST90244937,GCST90102715,GCST90201456,GCST90203497,GCST90200054,GCST90300419
http://purl.obolibrary.org/obo/OBA_2041778	GCST90235051
http://www.ebi.ac.uk/efo/EFO_0021045	GCST90134192,GCST90265988,GCST90243779,GCST90129035,GCST90128992,GCST90139751,GCST90245435,GCST90103198,GCST90202184,GCST90199743,GCST90203215,GCST90201143
http://www.ebi.ac.uk/efo/EFO_0004909	GCST001653,GCST90101961
http://www.ebi.ac.uk/efo/EFO_0021046	GCST90265028,GCST90243840,GCST90139801,GCST90102935,GCST90245169,GCST90201227,GCST90202263,GCST90203288,GCST90199820,GCST90299583
http://purl.obolibrary.org/obo/OBA_2041779	GCST90235877
http://www.ebi.ac.uk/efo/EFO_0021047	GCST90265049,GCST90243519,GCST90245175,GCST90102940,GCST90202090,GCST90199651,GCST90201053,GCST90203126,GCST90299586
http://www.ebi.ac.uk/efo/EFO_0021048	GCST90265051,GCST90243597,GCST90245176,GCST90102941,GCST90202144,GCST90199713,GCST90201107,GCST90203179,GCST90299588
http://www.ebi.ac.uk/efo/EFO_0007010	GCST002755,GCST90082119,GCST90082059,GCST90082089,GCST90082077,GCST90082000,GCST90082003,GCST90082044,GCST90082047,GCST90082166,GCST90082043,GCST90081981,GCST90082173,GCST90082206,GCST90082030,GCST90081992,GCST90082025,GCST90082164,GCST90082038,GCST90082002,GCST90082124,GCST90082106,GCST90082066,GCST90082001,GCST90082023,GCST90082216,GCST90081989,GCST90082190,GCST90082179,GCST90082142,GCST9008207…
http://www.ebi.ac.uk/efo/EFO_0021049	GCST90133864,GCST90243512,GCST90299595
http://www.ebi.ac.uk/efo/EFO_0007011	GCST002755
http://www.ebi.ac.uk/efo/EFO_0007012	GCST002816
http://www.ebi.ac.uk/efo/EFO_0801270	GCST90240050
http://www.ebi.ac.uk/efo/EFO_0007013	GCST002816,GCST007937,GCST90018995,GCST90018775
http://www.ebi.ac.uk/efo/EFO_0801271	GCST90240051
http://www.ebi.ac.uk/efo/EFO_0007014	GCST002956
http://www.ebi.ac.uk/efo/EFO_0801272	GCST90240052
http://www.ebi.ac.uk/efo/EFO_0007015	GCST002957
http://www.ebi.ac.uk/efo/EFO_0005772	GCST90079820,GCST90083807,GCST90083806,GCST90079821,GCST90246063
http://www.ebi.ac.uk/efo/EFO_0801273	GCST90240053
http://www.ebi.ac.uk/efo/EFO_0007016	GCST006038,GCST002790,GCST004979,GCST005721,GCST005724,GCST90018625,GCST90018845
http://www.ebi.ac.uk/efo/EFO_0005773	GCST90134548,GCST90043773,GCST90043775,GCST009958,GCST009959,GCST009960,GCST90077760,GCST90081745,GCST90081746,GCST90077759,GCST90079894,GCST90079895,GCST90079897,GCST90083883,GCST90083880,GCST90083881,GCST010377,GCST90013896,GCST90013946,GCST90018691,GCST90018911,GCST90246075
http://www.ebi.ac.uk/efo/EFO_0801274	GCST90240054
http://www.ebi.ac.uk/efo/EFO_0007017	GCST006039,GCST003881,GCST002791,GCST004980,GCST005727,GCST005723
http://www.ebi.ac.uk/efo/EFO_0005774	GCST90043758,GCST90079858,GCST90083844,GCST90246069
http://www.ebi.ac.uk/efo/EFO_0801275	GCST90240055
http://www.ebi.ac.uk/efo/EFO_0005775	GCST90104135
http://www.ebi.ac.uk/efo/EFO_0007018	GCST002789,GCST004977,GCST005725,GCST005728
http://www.ebi.ac.uk/efo/EFO_0801276	GCST90240056
http://www.ebi.ac.uk/efo/EFO_0007019	GCST002788,GCST004978,GCST005726,GCST005722
http://www.ebi.ac.uk/efo/EFO_0801277	GCST90240057
http://www.ebi.ac.uk/efo/EFO_0801278	GCST90240058
http://www.ebi.ac.uk/efo/EFO_0801279	GCST90240059
http://www.ebi.ac.uk/efo/EFO_1001890	GCST90038662,GCST90081797,GCST90081798,GCST90077811,GCST90077812,GCST90044679
http://www.ebi.ac.uk/efo/EFO_1001892	GCST90078639,GCST90082625,GCST90083795,GCST90079809,GCST90103928,GCST90103930,GCST90102442,GCST90102443,GCST90292532,GCST90292533
http://www.ebi.ac.uk/efo/EFO_1001893	GCST90017219,GCST90017220,GCST90017221,GCST90017222,GCST011420
http://www.ebi.ac.uk/efo/EFO_0009660	GCST90084254,GCST90084252,GCST90084253,GCST90080266,GCST90080267,GCST90080268,GCST90246145
http://www.ebi.ac.uk/efo/EFO_0009661	GCST90038668,GCST90080125,GCST90084111,GCST90013950,GCST90013900,GCST90018582,GCST90018802
http://purl.obolibrary.org/obo/OBA_2040450	GCST90234397
http://www.ebi.ac.uk/efo/EFO_0009662	GCST90041718,GCST90083536,GCST90079550,GCST90103384
http://purl.obolibrary.org/obo/OBA_2040451	GCST90239010
http://www.ebi.ac.uk/efo/EFO_1001896	GCST90080539,GCST90084525
http://www.ebi.ac.uk/efo/EFO_0009663	GCST90085359,GCST90080702,GCST90081373,GCST90084688
http://purl.obolibrary.org/obo/OBA_2040452	GCST90233002
http://purl.obolibrary.org/obo/OBA_2040453	GCST90235749
http://www.ebi.ac.uk/efo/EFO_0009665	GCST90080433,GCST90084419
http://www.ebi.ac.uk/efo/EFO_0021500	GCST90128578,GCST90128590,GCST90128548,GCST90128563
http://www.ebi.ac.uk/efo/EFO_1001898	GCST90102495,GCST90102505,GCST90102507
http://purl.obolibrary.org/obo/OBA_2040454	GCST90235967
http://www.ebi.ac.uk/efo/EFO_0021501	GCST90128579,GCST90128591,GCST90128549,GCST90128564
http://www.ebi.ac.uk/efo/EFO_0009666	GCST90080541,GCST90080538,GCST90084524,GCST90084527,GCST90044558,GCST90044561,GCST90129437,GCST90129438
http://purl.obolibrary.org/obo/OBA_2040455	GCST90233398
http://www.ebi.ac.uk/efo/EFO_0021502	GCST90128581,GCST90128551,GCST90128566,GCST90128593
http://www.ebi.ac.uk/efo/EFO_0009667	GCST90043815,GCST90083922,GCST90079936
http://purl.obolibrary.org/obo/OBA_2040456	GCST90234655
http://www.ebi.ac.uk/efo/EFO_0021503	GCST90128570,GCST90128585,GCST90128596,GCST90128597,GCST90128555
http://www.ebi.ac.uk/efo/EFO_0009668	GCST90043812,GCST90083916,GCST90079930
http://purl.obolibrary.org/obo/OBA_2040457	GCST90239105
http://www.ebi.ac.uk/efo/EFO_0000565	GCST90041908,GCST90042803,GCST90246038
http://www.ebi.ac.uk/efo/EFO_0021504	GCST90128572,GCST90128587,GCST90128598,GCST90128557
http://www.ebi.ac.uk/efo/EFO_0009669	GCST90044166,GCST90084788,GCST90084787,GCST90080801,GCST90080802
http://purl.obolibrary.org/obo/OBA_2040458	GCST90238051
http://purl.obolibrary.org/obo/OBA_2040459	GCST90235221
http://www.ebi.ac.uk/efo/EFO_0021506	GCST90133633,GCST90264363,GCST90264364,GCST90257400,GCST90243881,GCST90258005,GCST90267433,GCST90267434,GCST90139841,GCST90102776,GCST90202305,GCST90201279,GCST90203305,GCST90199865,GCST90299655
http://www.ebi.ac.uk/efo/EFO_0021507	GCST90133637,GCST90264372,GCST90243838,GCST90139781,GCST90244996,GCST90102779,GCST90202240,GCST90203262,GCST90201200,GCST90199795,GCST90299661
http://www.ebi.ac.uk/efo/EFO_0021508	GCST90133711,GCST90264632,GCST90264633,GCST90243831,GCST90140691,GCST90245063,GCST90102833,GCST90202189,GCST90199765,GCST90203245,GCST90201171,GCST90299656
http://purl.obolibrary.org/obo/OBA_2044340	GCST90238170
http://www.ebi.ac.uk/efo/EFO_0021509	GCST90133817,GCST90264918,GCST90264919,GCST90243550,GCST90140189,GCST90102905,GCST90245140,GCST90201733,GCST90200321,GCST90202764,GCST90299565
http://purl.obolibrary.org/obo/OBA_2044341	GCST90235069
http://purl.obolibrary.org/obo/OBA_2044342	GCST90233654
http://www.ebi.ac.uk/efo/EFO_0801730	GCST90241643,GCST90241644,GCST90248075
http://purl.obolibrary.org/obo/OBA_2044343	GCST90235548
http://www.ebi.ac.uk/efo/EFO_0801731	GCST90241647,GCST90241648,GCST90248076
http://purl.obolibrary.org/obo/OBA_2044344	GCST90236955
http://www.ebi.ac.uk/efo/EFO_0801732	GCST90241649,GCST90248077
http://purl.obolibrary.org/obo/OBA_2044345	GCST90238325
http://www.ebi.ac.uk/efo/EFO_0801733	GCST90241655,GCST90248141
http://purl.obolibrary.org/obo/OBA_2044346	GCST90239261
http://www.ebi.ac.uk/efo/EFO_0801734	GCST90241656,GCST90248136
http://purl.obolibrary.org/obo/OBA_2044347	GCST90236531
http://www.ebi.ac.uk/efo/EFO_0801735	GCST90241659,GCST90248131
http://purl.obolibrary.org/obo/OBA_2044348	GCST90236567
http://www.ebi.ac.uk/efo/EFO_0801736	GCST90241661
http://purl.obolibrary.org/obo/OBA_2044349	GCST90235698
http://www.ebi.ac.uk/efo/EFO_0801737	GCST90241662,GCST90248130
http://www.ebi.ac.uk/efo/EFO_0801738	GCST90241663,GCST90248145
http://www.ebi.ac.uk/efo/EFO_0004458	GCST005067,GCST004815,GCST000083,GCST000337,GCST000965,GCST000179,GCST001605,GCST001762,GCST001472,GCST000933,GCST001093,GCST001247,GCST000430,GCST000178,GCST006012,GCST007121,GCST002424,GCST001385,GCST002640,GCST001650,GCST90025959,GCST012480,GCST90319532,GCST90134509,GCST90134478,GCST90019446,GCST005770,GCST009777,GCST012140,GCST011350,GCST008055,GCST011657,GCST011919,GCST90079026,GCST90083012,…
http://purl.obolibrary.org/obo/HP_0012735	GCST004049,GCST003027,GCST90084750,GCST90080764,GCST90044090,GCST90078872,GCST90082858,GCST90246201
http://www.ebi.ac.uk/efo/EFO_0801739	GCST90241678,GCST90248162
http://www.ebi.ac.uk/efo/EFO_0004459	GCST005072,GCST001247,GCST90013337,GCST90241157,GCST90241158,GCST002578,GCST002677,GCST004573,GCST012145,GCST011869,GCST90100994,GCST90238124,GCST011758,GCST011369,GCST90012653,GCST90162473,GCST90225973,GCST90247573,GCST90270865
http://www.ebi.ac.uk/efo/EFO_0022377	GCST90274734,GCST90274752
http://www.ebi.ac.uk/efo/EFO_0022378	GCST90274736,GCST90274737,GCST90274734,GCST90274739,GCST90274735,GCST90274738,GCST90274740,GCST90274741,GCST90274742,GCST90274743,GCST90274744,GCST90274745,GCST90274746,GCST90274747,GCST90274748,GCST90274749,GCST90274750,GCST90274751,GCST90274752
http://www.ebi.ac.uk/efo/EFO_0008340	GCST004708
http://www.ebi.ac.uk/efo/EFO_0022379	GCST90274740,GCST90274747
http://www.ebi.ac.uk/efo/EFO_0008341	GCST004698,GCST90041775,GCST009761,GCST009762,GCST009763,GCST009760,GCST010982,GCST007985
http://purl.obolibrary.org/obo/OBA_2040910	GCST90232819
http://www.ebi.ac.uk/efo/EFO_0008342	GCST000247,GCST000245
http://purl.obolibrary.org/obo/OBA_2040911	GCST90233386
http://www.ebi.ac.uk/efo/EFO_0008343	GCST001566,GCST007016,GCST000930,GCST000931,GCST000928,GCST002445,GCST005949,GCST005950,GCST005955,GCST005959,GCST005960,GCST005962,GCST005086,GCST005092,GCST005090,GCST005088,GCST006680,GCST90027904,GCST90095141,GCST009533,GCST010313,GCST009419,GCST007207,GCST90014239,GCST90014240,GCST90014241,GCST90014242,GCST008224,GCST90239710,GCST002635,GCST002856,GCST005361,GCST011463,GCST011462,GCST008138,…
http://purl.obolibrary.org/obo/OBA_2040912	GCST90236064
http://www.ebi.ac.uk/efo/EFO_0008344	GCST004961,GCST004965,GCST004742,GCST004743,GCST004739,GCST012001,GCST009277,GCST009276
http://purl.obolibrary.org/obo/OBA_2040913	GCST90239305
http://purl.obolibrary.org/obo/OBA_2040914	GCST90235909
http://www.ebi.ac.uk/efo/EFO_0008346	GCST004799
http://purl.obolibrary.org/obo/OBA_2040915	GCST90238035
http://www.ebi.ac.uk/efo/EFO_0008347	GCST004790,GCST004788,GCST009381
http://purl.obolibrary.org/obo/OBA_2040916	GCST90233423
http://www.ebi.ac.uk/efo/EFO_0008348	GCST004801,GCST004803,GCST004802,GCST006277
http://purl.obolibrary.org/obo/OBA_2040917	GCST90234182
http://www.ebi.ac.uk/efo/EFO_0008349	GCST004786
http://purl.obolibrary.org/obo/OBA_2040918	GCST90235571
http://purl.obolibrary.org/obo/OBA_2040919	GCST90232837
http://purl.obolibrary.org/obo/OBA_2043020	GCST90238909
http://purl.obolibrary.org/obo/OBA_2044800	GCST90235650
http://purl.obolibrary.org/obo/OBA_2043021	GCST90238630
http://purl.obolibrary.org/obo/OBA_2044801	GCST90239070
http://www.ebi.ac.uk/efo/EFO_0800410	GCST90264264,GCST90139969,GCST90244941,GCST90102718,GCST90201454,GCST90203499,GCST90200063,GCST90300502
http://purl.obolibrary.org/obo/OBA_2043022	GCST90234249
http://purl.obolibrary.org/obo/OBA_2044802	GCST90234527
http://www.ebi.ac.uk/efo/EFO_0004910	GCST001661
http://www.ebi.ac.uk/efo/EFO_0800411	GCST90264287,GCST90139970,GCST90244966,GCST90102749,GCST90201457,GCST90203504,GCST90200065,GCST90202503,GCST90300505
http://purl.obolibrary.org/obo/OBA_2043023	GCST90238573
http://purl.obolibrary.org/obo/OBA_2041780	GCST90239368
http://purl.obolibrary.org/obo/OBA_2044803	GCST90238706
http://www.ebi.ac.uk/efo/EFO_0004911	GCST011014
http://www.ebi.ac.uk/efo/EFO_0800412	GCST90264261,GCST90139971,GCST90244938,GCST90102716,GCST90201459,GCST90203507,GCST90200062,GCST90202499,GCST90300420
http://purl.obolibrary.org/obo/OBA_2041781	GCST90238899
http://purl.obolibrary.org/obo/OBA_2043024	GCST90239155
http://purl.obolibrary.org/obo/OBA_2044804	GCST90238475
http://www.ebi.ac.uk/efo/EFO_0004912	GCST002402,GCST001626,GCST011917,GCST008568,GCST006360,GCST90233055,GCST90137505,GCST90012678
http://www.ebi.ac.uk/efo/EFO_0800413	GCST90264291,GCST90139972,GCST90244971,GCST90102754,GCST90201445,GCST90203494,GCST90200067,GCST90202486,GCST90300469
http://purl.obolibrary.org/obo/OBA_2041782	GCST90233711
http://purl.obolibrary.org/obo/OBA_2043025	GCST90233970
http://purl.obolibrary.org/obo/OBA_2044805	GCST90233487
http://www.ebi.ac.uk/efo/EFO_0004913	GCST001141,GCST001296,GCST001640
http://www.ebi.ac.uk/efo/EFO_0800414	GCST90139973
http://www.ebi.ac.uk/efo/EFO_0021050	GCST90265451,GCST90243747,GCST90139748,GCST90103036,GCST90245281,GCST90202183,GCST90199748,GCST90201146,GCST90203210,GCST90299685
http://purl.obolibrary.org/obo/OBA_2044806	GCST90238996
http://purl.obolibrary.org/obo/OBA_2043026	GCST90235731
http://purl.obolibrary.org/obo/OBA_2041783	GCST90233212
http://www.ebi.ac.uk/efo/EFO_0004914	GCST001618
http://www.ebi.ac.uk/efo/EFO_0800415	GCST90264201,GCST90139974,GCST90244864,GCST90102644,GCST90201463,GCST90200058,GCST90202487,GCST90300324
http://purl.obolibrary.org/obo/OBA_2044807	GCST90238013
http://purl.obolibrary.org/obo/OBA_2043027	GCST90233490
http://purl.obolibrary.org/obo/OBA_2041784	GCST90233992
http://www.ebi.ac.uk/efo/EFO_0021051	GCST90133966,GCST90243798,GCST90257446,GCST90258051,GCST90245270
http://www.ebi.ac.uk/efo/EFO_0004915	GCST001642,GCST90085786,GCST90085814
http://www.ebi.ac.uk/efo/EFO_0800416	GCST90139975,GCST90244853,GCST90102633
http://www.ebi.ac.uk/efo/EFO_0021052	GCST90243886
http://purl.obolibrary.org/obo/OBA_2044808	GCST90239267
http://purl.obolibrary.org/obo/OBA_2043028	GCST90235103
http://purl.obolibrary.org/obo/OBA_2041785	GCST90233167
http://www.ebi.ac.uk/efo/EFO_0800417	GCST90139976,GCST90244851,GCST90102631,GCST90201465,GCST90203498,GCST90200048,GCST90202501,GCST90300316
http://purl.obolibrary.org/obo/OBA_2041786	GCST90237976
http://purl.obolibrary.org/obo/OBA_2044809	GCST90234623
http://purl.obolibrary.org/obo/OBA_2043029	GCST90236943
http://www.ebi.ac.uk/efo/EFO_0021053	GCST90133667,GCST90257423,GCST90243574,GCST90258028,GCST90139725,GCST90245018,GCST90102795,GCST90202143,GCST90199712,GCST90201114,GCST90203178,GCST90299561
http://www.ebi.ac.uk/efo/EFO_0800418	GCST90139977,GCST90244866,GCST90102646
http://purl.obolibrary.org/obo/OBA_2041787	GCST90234932
http://www.ebi.ac.uk/efo/EFO_0021054	GCST90133859,GCST90243586,GCST90139717,GCST90245177,GCST90102944,GCST90202130,GCST90199697,GCST90201098,GCST90203159
http://www.ebi.ac.uk/efo/EFO_0004918	GCST008217,GCST008218,GCST90079137,GCST011773,GCST90083123,GCST007198,GCST90102280,GCST90102281,GCST90102282,GCST90102283,GCST010774,GCST010773,GCST010772,GCST010771,GCST010770,GCST010769,GCST010768,GCST010767,GCST010766,GCST010765,GCST010764,GCST010763,GCST90297777,GCST90295969
http://www.ebi.ac.uk/efo/EFO_0800419	GCST90139978,GCST90244858,GCST90102638,GCST90201464,GCST90203492,GCST90200061,GCST90202502,GCST90300320
http://purl.obolibrary.org/obo/OBA_2041788	GCST90232982
http://www.ebi.ac.uk/efo/EFO_0021055	GCST90133936,GCST90243839,GCST90128892,GCST90139787,GCST90245242,GCST90103006,GCST90201211,GCST90202246,GCST90203258,GCST90199807,GCST90299640
http://purl.obolibrary.org/obo/OBA_2041789	GCST90233906
http://www.ebi.ac.uk/efo/EFO_0021056	GCST90134079,GCST90265738,GCST90243867,GCST90139788,GCST90245344,GCST90201210,GCST90202245,GCST90203252,GCST90199805,GCST90299730
http://www.ebi.ac.uk/efo/EFO_0021057	GCST90134210,GCST90266052,GCST90243837,GCST90139786,GCST90245451,GCST90103212,GCST90201209,GCST90202257,GCST90203264,GCST90199806
http://purl.obolibrary.org/obo/MONDO_0000916	GCST90041707,GCST90079538,GCST90083524
http://www.ebi.ac.uk/efo/EFO_0021058	GCST90243870
http://www.ebi.ac.uk/efo/EFO_0007020	GCST002883
http://www.ebi.ac.uk/efo/EFO_0021059	GCST90133639,GCST90264377,GCST90243502,GCST90140186,GCST90244998,GCST90102780,GCST90201718,GCST90200312,GCST90203754,GCST90202761,GCST90299664
http://www.ebi.ac.uk/efo/EFO_0007021	GCST002778
http://www.ebi.ac.uk/efo/EFO_0801280	GCST90240060
http://www.ebi.ac.uk/efo/EFO_0801281	GCST90240061
http://www.ebi.ac.uk/efo/EFO_0801282	GCST90240062
http://www.ebi.ac.uk/efo/EFO_0005782	GCST003763,GCST002491,GCST002487,GCST90053841,GCST90053842,GCST90053843,GCST90012115,GCST008899,GCST008898,GCST012442,GCST009431,GCST009430,GCST009432,GCST009429,GCST90132906,GCST90132907
http://www.ebi.ac.uk/efo/EFO_0801283	GCST90240063
http://www.ebi.ac.uk/efo/EFO_0801284	GCST90240064
http://www.ebi.ac.uk/efo/EFO_0801285	GCST90240065
http://www.ebi.ac.uk/efo/EFO_0801286	GCST90240066
http://www.ebi.ac.uk/efo/EFO_0801287	GCST90240067
http://purl.obolibrary.org/obo/MONDO_0004805	GCST90083703,GCST90079717
http://www.ebi.ac.uk/efo/EFO_0801288	GCST90240068
http://www.ebi.ac.uk/efo/EFO_0801289	GCST90240069
http://www.ebi.ac.uk/efo/EFO_0009670	GCST90044342
http://purl.obolibrary.org/obo/OBA_2040460	GCST90235873
http://www.ebi.ac.uk/efo/EFO_0009672	GCST90079945,GCST90083931
http://purl.obolibrary.org/obo/OBA_2040461	GCST90236423
http://www.ebi.ac.uk/efo/EFO_0009673	GCST90038671,GCST90044048,GCST90044050,GCST90080121,GCST90084108,GCST90084107,GCST90080122,GCST90269776,GCST90246118
http://purl.obolibrary.org/obo/OBA_2040462	GCST90233964
http://www.ebi.ac.uk/efo/EFO_0009674	GCST90043807
http://www.ebi.ac.uk/efo/EFO_0021510	GCST90243417,GCST90299684
http://purl.obolibrary.org/obo/OBA_2040463	GCST90239271
http://www.ebi.ac.uk/efo/EFO_0009675	GCST90042870,GCST90083663,GCST90083659,GCST90083660,GCST90083661,GCST90083662,GCST90079673,GCST90079674,GCST90079675,GCST90079676,GCST90079677
http://www.ebi.ac.uk/efo/EFO_0000571	GCST004744,GCST000947,GCST000223,GCST001609,GCST000761,GCST000810,GCST000506,GCST002466,GCST003605,GCST003776,GCST003588,GCST003587,GCST005909,GCST006087,GCST012201,GCST003326,GCST003794,GCST008375,GCST008836,GCST011177,GCST90134662,GCST90297562,GCST90297563
http://www.ebi.ac.uk/efo/EFO_0021511	GCST90243542
http://purl.obolibrary.org/obo/OBA_2040464	GCST90238166,GCST90234399
http://www.ebi.ac.uk/efo/EFO_0009676	GCST90038601,GCST90134417,GCST90134418,GCST90134419,GCST90080570,GCST90080569,GCST90084555,GCST90084556,GCST90044619,GCST90044622
http://purl.obolibrary.org/obo/OBA_2040465	GCST90235940
http://www.ebi.ac.uk/efo/EFO_0021512	GCST90133609,GCST90176134,GCST90178714,GCST90264314,GCST90264315,GCST90243776,GCST90140686,GCST90244877,GCST90102659,GCST90199756,GCST90202206,GCST90203219,GCST90201168,GCST90299840
http://www.ebi.ac.uk/efo/EFO_0009677	GCST90043997,GCST90043998,GCST90043999,GCST90080038,GCST90084024,GCST90246100,GCST90246101
http://www.ebi.ac.uk/efo/EFO_0021513	GCST90243889
http://purl.obolibrary.org/obo/OBA_2040466	GCST90234795
http://www.ebi.ac.uk/efo/EFO_0009678	GCST90043805,GCST90083841,GCST90079855
http://www.ebi.ac.uk/efo/EFO_0000574	GCST001826,GCST002066,GCST90079120,GCST90083106,GCST90041907,GCST90042740,GCST90043907,GCST90083621,GCST90083622,GCST90079636,GCST90079635,GCST90018658,GCST90018878
http://www.ebi.ac.uk/efo/EFO_0021514	GCST90243892
http://purl.obolibrary.org/obo/OBA_2040467	GCST90233236
http://www.ebi.ac.uk/efo/EFO_0009679	GCST90043752
http://www.ebi.ac.uk/efo/EFO_0021515	GCST90243896
http://purl.obolibrary.org/obo/OBA_2040468	GCST90234842
http://purl.obolibrary.org/obo/OBA_2040469	GCST90234662
http://www.ebi.ac.uk/efo/EFO_0021517	GCST90243898
http://www.ebi.ac.uk/efo/EFO_0021518	GCST90243911
http://www.ebi.ac.uk/efo/EFO_0021519	GCST90243912
http://purl.obolibrary.org/obo/OBA_2044350	GCST90235057
http://purl.obolibrary.org/obo/OBA_2044351	GCST90233311
http://www.ebi.ac.uk/efo/EFO_0004460	GCST90085780
http://purl.obolibrary.org/obo/OBA_2044352	GCST90233664
http://www.ebi.ac.uk/efo/EFO_0801740	GCST90241684,GCST90248179
http://purl.obolibrary.org/obo/OBA_2044353	GCST90239294
http://www.ebi.ac.uk/efo/EFO_0011000	GCST90013573,GCST90279651,GCST90176333
http://www.ebi.ac.uk/efo/EFO_0801741	GCST90241686,GCST90248207
http://www.ebi.ac.uk/efo/EFO_0004461	GCST000517,GCST000302,GCST000301,GCST000505,GCST001021,GCST000935,GCST000913,GCST002609,GCST90013341,GCST002677,GCST002680,GCST002679,GCST002678,GCST90016676,GCST008960
http://www.ebi.ac.uk/efo/EFO_0011001	GCST90013574,GCST90265939,GCST90243585,GCST90299778
http://purl.obolibrary.org/obo/OBA_2044354	GCST90235615
http://www.ebi.ac.uk/efo/EFO_0801742	GCST90241688
http://www.ebi.ac.uk/efo/EFO_0004462	GCST001925,GCST001735,GCST000561,GCST000971,GCST002279,GCST000562,GCST002535,GCST005080,GCST007226,GCST011856,GCST008042,GCST007045,GCST011859,GCST010320,GCST010321,GCST011484,GCST90093374
http://purl.obolibrary.org/obo/OBA_2044355	GCST90233913
http://www.ebi.ac.uk/efo/EFO_0011002	GCST90134195,GCST90013575,GCST90265994,GCST90265995,GCST90257467,GCST90258072,GCST90139677,GCST90245437,GCST90103199,GCST90201784,GCST90200362,GCST90202801,GCST90299792
http://www.ebi.ac.uk/efo/EFO_0801743	GCST90241694,GCST90248214
http://www.ebi.ac.uk/efo/EFO_0004463	GCST000565,GCST90232965
http://purl.obolibrary.org/obo/OBA_2044356	GCST90233593
http://www.ebi.ac.uk/efo/EFO_0011003	GCST90013578
http://www.ebi.ac.uk/efo/EFO_0801744	GCST90241696,GCST90248168
http://www.ebi.ac.uk/efo/EFO_0004464	GCST000615,GCST000597,GCST001481,GCST001045,GCST001109,GCST007712,GCST008795,GCST008796,GCST008797,GCST008798,GCST008799,GCST008800,GCST90010427,GCST90012995,GCST90012996,GCST90012997,GCST90012998,GCST90012999,GCST90013000,GCST90013001,GCST90013002,GCST90013003,GCST90013004,GCST90013005,GCST90013006,GCST90013007,GCST90013008,GCST90013009,GCST90013010,GCST90013011,GCST90013012,GCST90013013,GCST900…
http://www.ebi.ac.uk/efo/EFO_0022381	GCST90274743,GCST90274751
http://www.ebi.ac.uk/efo/EFO_0011004	GCST90013579
http://purl.obolibrary.org/obo/OBA_2044357	GCST90235620
http://www.ebi.ac.uk/efo/EFO_0801745	GCST90241699,GCST90241700,GCST90248171
http://www.ebi.ac.uk/efo/EFO_0004465	GCST005877,GCST000085,GCST001762,GCST000591,GCST000457,GCST001233,GCST000568,GCST000205,GCST001486,GCST000202,GCST008144,GCST002586,GCST002110,GCST001527,GCST005186,GCST000291,GCST000276,GCST002610,GCST90134406,GCST010062,GCST009660,GCST009655,GCST007670,GCST009864,GCST006404,GCST006257,GCST011340,GCST011332,GCST011324,GCST005913,GCST008777,GCST011685,GCST008032,GCST011587,GCST90084887,GCST900809…
http://www.ebi.ac.uk/efo/EFO_0022382	GCST90274746,GCST90274752
http://purl.obolibrary.org/obo/OBA_2044358	GCST90234720
http://www.ebi.ac.uk/efo/EFO_0801746	GCST90241701,GCST90248172
http://www.ebi.ac.uk/efo/EFO_0011005	GCST90134491,GCST90134517,GCST90100562,GCST90013581,GCST90266119,GCST90266120,GCST90243454,GCST90132751,GCST90139592,GCST90103232,GCST90309893,GCST90201818,GCST90200417,GCST90203847,GCST90202854,GCST90029152,GCST90029153,GCST90029154,GCST90299816
http://www.ebi.ac.uk/efo/EFO_0004466	GCST000077,GCST001762,GCST000571,GCST001526,GCST005185,GCST002248,GCST90134407,GCST010271,GCST007671,GCST006404,GCST011341,GCST011333,GCST011325,GCST005915,GCST008778,GCST008033,GCST90310275,GCST90310276,GCST90310277,GCST90310278,GCST90310279,GCST004533,GCST007760,GCST007762,GCST007764,GCST007766,GCST007768,GCST007769,GCST007770,GCST007771,GCST007772,GCST007773,GCST008673,GCST008674,GCST007898,GC…
http://purl.obolibrary.org/obo/OBA_2044359	GCST90236460
http://www.ebi.ac.uk/efo/EFO_0801747	GCST90241710,GCST90248192
http://www.ebi.ac.uk/efo/EFO_0004467	GCST005220,GCST005219,GCST000073,GCST000526,GCST001604,GCST000292,GCST005159,GCST005160,GCST005161,GCST90079488,GCST90027075,GCST90027076,GCST90027077,GCST90002236,GCST90002237,GCST90002238,GCST90002239,GCST90002240,GCST90002241,GCST009863,GCST90091146,GCST90091171,GCST90091152,GCST90091182,GCST90091194,GCST90091161,GCST008109,GCST008113,GCST008112,GCST90012183,GCST90083474,GCST90241505,GCST00121…
http://www.ebi.ac.uk/efo/EFO_0011007	GCST011407,GCST90101963
http://www.ebi.ac.uk/efo/EFO_0801748	GCST90241713,GCST90248620
http://www.ebi.ac.uk/efo/EFO_0004468	GCST000073,GCST000292,GCST006002,GCST005577,GCST003540,GCST90025986,GCST90025999,GCST90134494,GCST90134499,GCST90134505,GCST90134484,GCST90002230,GCST90002231,GCST90002232,GCST90002233,GCST90002234,GCST90002235,GCST010661,GCST90091517,GCST005763,GCST90095207,GCST90084892,GCST90083015,GCST90080906,GCST90079029,GCST90019508,GCST90297374,GCST90297330,GCST90297286,GCST90297506,GCST90297462,GCST902974…
http://www.ebi.ac.uk/efo/EFO_0011008	GCST012150
http://www.ebi.ac.uk/efo/EFO_0801749	GCST90241715,GCST90248211
http://www.ebi.ac.uk/efo/EFO_0004469	GCST005180,GCST002251,GCST010270,GCST010724,GCST008674,GCST011759,GCST90269895,GCST90281116,GCST90281123
http://www.ebi.ac.uk/efo/EFO_0011009	GCST011373
http://purl.obolibrary.org/obo/MONDO_0000465	GCST90083989,GCST90080003
http://purl.obolibrary.org/obo/MONDO_0000468	GCST90043972
http://purl.obolibrary.org/obo/OBA_2040920	GCST90235013
http://purl.obolibrary.org/obo/OBA_2040921	GCST90236002
http://www.ebi.ac.uk/efo/EFO_0008353	GCST004820
http://purl.obolibrary.org/obo/OBA_2040922	GCST90235031
http://www.ebi.ac.uk/efo/EFO_0008354	GCST004823,GCST008587,GCST008583,GCST008584,GCST008585,GCST008586,GCST008588,GCST008589,GCST008590,GCST004975,GCST006933,GCST90082372,GCST90082373,GCST90082371,GCST90082370,GCST90078350,GCST90078353,GCST90078354,GCST90078355,GCST90078356,GCST90078357,GCST90079169,GCST90082300,GCST90083127,GCST90083155,GCST90078352,GCST90078351,GCST90079378,GCST90079377,GCST90079380,GCST90079379,GCST90078365,GCST9…
http://purl.obolibrary.org/obo/OBA_2040923	GCST90233786
http://www.ebi.ac.uk/efo/EFO_0008355	GCST001843,GCST90255443
http://purl.obolibrary.org/obo/OBA_2040924	GCST90234679,GCST90179345
http://purl.obolibrary.org/obo/OBA_2040925	GCST90233615
http://purl.obolibrary.org/obo/OBA_2040926	GCST90233691
http://www.ebi.ac.uk/efo/EFO_0008358	GCST000271
http://purl.obolibrary.org/obo/OBA_2040927	GCST90235658
http://purl.obolibrary.org/obo/OBA_2040928	GCST90236054
http://purl.obolibrary.org/obo/OBA_2040929	GCST90238398
http://purl.obolibrary.org/obo/HP_0002239	GCST90084251,GCST90080265
http://purl.obolibrary.org/obo/OBA_2044810	GCST90236288
http://purl.obolibrary.org/obo/OBA_2043030	GCST90238034
http://purl.obolibrary.org/obo/OBA_2044811	GCST90236275
http://purl.obolibrary.org/obo/OBA_2043031	GCST90235962
http://www.ebi.ac.uk/efo/EFO_0800420	GCST90264196,GCST90139979,GCST90244857,GCST90102637,GCST90201466,GCST90203493,GCST90200057,GCST90202505,GCST90300319
http://purl.obolibrary.org/obo/OBA_2044812	GCST90239163
http://purl.obolibrary.org/obo/OBA_2043032	GCST90238327
http://www.ebi.ac.uk/efo/EFO_0004920	GCST004897,GCST90095080,GCST012474,GCST012473,GCST012472,GCST012471,GCST90267409,GCST90267411,GCST003328,GCST003058,GCST003057,GCST003794,GCST007365,GCST012155
http://www.ebi.ac.uk/efo/EFO_0800421	GCST90139980,GCST90244852,GCST90102632
http://purl.obolibrary.org/obo/OBA_2044813	GCST90233849
http://purl.obolibrary.org/obo/OBA_2041790	GCST90233671
http://purl.obolibrary.org/obo/OBA_2043033	GCST90233628
http://www.ebi.ac.uk/efo/EFO_0800422	GCST90139981,GCST90244854,GCST90102634,GCST90201472,GCST90203502,GCST90200060,GCST90202504
http://purl.obolibrary.org/obo/OBA_2044814	GCST90238713
http://purl.obolibrary.org/obo/OBA_2041791	GCST90235465
http://purl.obolibrary.org/obo/OBA_2043034	GCST90234896
http://www.ebi.ac.uk/efo/EFO_0800423	GCST90264191,GCST90139982,GCST90244850,GCST90102630,GCST90201467,GCST90200052,GCST90202498,GCST90271642,GCST90271659
http://purl.obolibrary.org/obo/OBA_2044815	GCST90239076
http://purl.obolibrary.org/obo/OBA_2041792	GCST90236615
http://purl.obolibrary.org/obo/OBA_2043035	GCST90232979
http://www.ebi.ac.uk/efo/EFO_0800424	GCST90139983,GCST90244865,GCST90102645
http://www.ebi.ac.uk/efo/EFO_0021060	GCST90264316,GCST90243744,GCST90139744,GCST90244878,GCST90102660,GCST90202172,GCST90199731,GCST90201125,GCST90299637
http://purl.obolibrary.org/obo/OBA_2041793	GCST90235745
http://purl.obolibrary.org/obo/OBA_2044816	GCST90236866
http://purl.obolibrary.org/obo/OBA_2043036	GCST90238322
http://www.ebi.ac.uk/efo/EFO_0003144	GCST000104,GCST000675,GCST90085925,GCST90043986,GCST009541,GCST005765,GCST010663,GCST90080022,GCST90085471,GCST90084009,GCST90084007,GCST90084008,GCST90081485,GCST90080023,GCST90080021,GCST004044,GCST004045,GCST007715,GCST90103407,GCST90018586,GCST90018806,GCST90250820,GCST90162626,GCST90239776,GCST90274223,GCST90246093
http://www.ebi.ac.uk/efo/EFO_0800425	GCST90139984,GCST90102734
http://purl.obolibrary.org/obo/OBA_2044817	GCST90238912
http://purl.obolibrary.org/obo/OBA_2041794	GCST90236535
http://purl.obolibrary.org/obo/OBA_2043037	GCST90235420
http://www.ebi.ac.uk/efo/EFO_0021061	GCST90133611,GCST90264317,GCST90243745,GCST90139743,GCST90244879,GCST90102661,GCST90202173,GCST90199728,GCST90201126,GCST90203199,GCST90299728
http://www.ebi.ac.uk/efo/EFO_0800426	GCST90139985,GCST90244957,GCST90102732
http://purl.obolibrary.org/obo/OBA_2044818	GCST90238923
http://purl.obolibrary.org/obo/OBA_2041795	GCST90238482
http://purl.obolibrary.org/obo/OBA_2043038	GCST90236808
http://www.ebi.ac.uk/efo/EFO_0021062	GCST90133756,GCST90243651,GCST90139728,GCST90102864,GCST90245101,GCST90202145,GCST90199709,GCST90201113,GCST90203187,GCST90299521
http://www.ebi.ac.uk/efo/EFO_0021063	GCST90264822,GCST90243419,GCST90128870,GCST90140206,GCST90245115,GCST90102878,GCST90200358,GCST90201760,GCST90203790,GCST90202793,GCST90299540,GCST90271645,GCST90271662
http://www.ebi.ac.uk/efo/EFO_0800427	GCST90264842,GCST90139987,GCST90201469,GCST90203500,GCST90200059,GCST90202494,GCST90300291
http://purl.obolibrary.org/obo/OBA_2044819	GCST90236341
http://purl.obolibrary.org/obo/OBA_2043039	GCST90233225
http://purl.obolibrary.org/obo/OBA_2041796	GCST90236034
http://www.ebi.ac.uk/efo/EFO_0800428	GCST90265656,GCST90139989,GCST90103099,GCST90201471,GCST90203511,GCST90200064,GCST90300698,GCST90271652,GCST90271669
http://purl.obolibrary.org/obo/OBA_2041797	GCST90236538
http://www.ebi.ac.uk/efo/EFO_0021064	GCST90133843,GCST90265027,GCST90243500,GCST90140185,GCST90102934,GCST90245168,GCST90201709,GCST90200320,GCST90203750,GCST90202758,GCST90299582
http://www.ebi.ac.uk/efo/EFO_0021065	GCST90243704,GCST90299597
http://www.ebi.ac.uk/efo/EFO_0800429	GCST90265432,GCST90139990,GCST90103031,GCST90201474,GCST90203509,GCST90200055,GCST90202497,GCST90300361
http://purl.obolibrary.org/obo/OBA_2041798	GCST90233730
http://purl.obolibrary.org/obo/OBA_2041799	GCST90236558
http://www.ebi.ac.uk/efo/EFO_0021066	GCST90134000,GCST90265484,GCST90243421,GCST90140228,GCST90103049,GCST90245289,GCST90200459,GCST90201841,GCST90202866,GCST90203864,GCST90299693
http://www.ebi.ac.uk/efo/EFO_0021067	GCST90265521,GCST90243434,GCST90140225,GCST90103059,GCST90245297,GCST90201811,GCST90200414,GCST90203843,GCST90202860,GCST90299711
http://www.ebi.ac.uk/efo/EFO_0021068	GCST90176287,GCST90265523,GCST90243590,GCST90257522,GCST90258127,GCST90139730,GCST90103060,GCST90245298,GCST90202152,GCST90199715,GCST90201117,GCST90299712
http://www.ebi.ac.uk/efo/EFO_0021069	GCST90134076,GCST90265727,GCST90243430,GCST90140229,GCST90245340,GCST90103097,GCST90200451,GCST90201834,GCST90202869,GCST90203868,GCST90299727
http://purl.obolibrary.org/obo/HP_0008770	GCST012194
http://www.ebi.ac.uk/efo/EFO_0801290	GCST90240070
http://www.ebi.ac.uk/efo/EFO_0801291	GCST90240071
http://www.ebi.ac.uk/efo/EFO_0007034	GCST90295923,GCST90295924,GCST90295925,GCST90295926,GCST90295927,GCST90295928,GCST90295929,GCST90295930,GCST90295931,GCST90295932,GCST90295933,GCST90295934,GCST90295935,GCST90295936,GCST90295937,GCST90295938,GCST90295939,GCST90295940,GCST90295941,GCST90295942,GCST90295943,GCST90295944,GCST90104165,GCST002804
http://www.ebi.ac.uk/efo/EFO_0801292	GCST90240072
http://purl.obolibrary.org/obo/MONDO_0017427	GCST90044584
http://www.ebi.ac.uk/efo/EFO_0801293	GCST90240073
http://purl.obolibrary.org/obo/MONDO_0017428	GCST90084418,GCST90080432
http://www.ebi.ac.uk/efo/EFO_0007036	GCST90078886,GCST90078887,GCST90082872,GCST90082873,GCST90294172,GCST90294173,GCST90294174,GCST90294175,GCST90294176,GCST90294177,GCST90294178,GCST90294179,GCST90294180,GCST90294195,GCST90294196,GCST90294197,GCST90294183,GCST90294184,GCST90294201,GCST90294202,GCST90294203,GCST90294204,GCST90294205,GCST90294206,GCST90294189,GCST90294209,GCST90294210,GCST90294211,GCST90294192,GCST90294214,GCST90294…
http://www.ebi.ac.uk/efo/EFO_0801294	GCST90240074
http://www.ebi.ac.uk/efo/EFO_0007037	GCST90078889,GCST90082875,GCST90294306,GCST90294308,GCST90294310,GCST90294311,GCST90294312,GCST90294313,GCST90294317,GCST90294319,GCST90294321,GCST90294307,GCST90294309,GCST90294315,GCST90294316,GCST90294318,GCST90294320,GCST90294225,GCST90294226,GCST90294227,GCST90294228,GCST90294229,GCST90294230,GCST90294231,GCST90294232,GCST90294233,GCST90294234,GCST90294235,GCST90294236,GCST90294237,GCST90294…
http://www.ebi.ac.uk/efo/EFO_0801295	GCST90240075
http://www.ebi.ac.uk/efo/EFO_0007038	GCST90294473,GCST90294458,GCST90294459,GCST90294460,GCST90294461,GCST90294462,GCST90294463,GCST90294464,GCST90294465,GCST90294466,GCST90294467,GCST90294468,GCST90294469,GCST90294470,GCST90294474,GCST90294475,GCST90294476,GCST90294477,GCST90294478,GCST90294479,GCST90294480,GCST90294481,GCST90294482,GCST90294483,GCST90294484,GCST90294485,GCST90294486,GCST90294487,GCST90294488,GCST90294489,GCST006339
http://www.ebi.ac.uk/efo/EFO_0801296	GCST90240076
http://www.ebi.ac.uk/efo/EFO_0801297	GCST90240077
http://www.ebi.ac.uk/efo/EFO_0801298	GCST90240078
http://www.ebi.ac.uk/efo/EFO_0801299	GCST90240079
http://www.ebi.ac.uk/efo/EFO_0005799	GCST90134522,GCST90134523,GCST90134524
http://www.ebi.ac.uk/efo/EFO_0009680	GCST90044082
http://purl.obolibrary.org/obo/MONDO_0001798	GCST90044568
http://www.ebi.ac.uk/efo/EFO_0009681	GCST90080723,GCST90084709,GCST90245832,GCST90245835,GCST90275119
http://purl.obolibrary.org/obo/OBA_2040470	GCST90234690
http://www.ebi.ac.uk/efo/EFO_0009682	GCST90084727,GCST90084728,GCST90084732,GCST90084729,GCST90080741,GCST90080726,GCST90080725,GCST90080743,GCST90080742,GCST90080746,GCST90084712,GCST90084711,GCST90103426,GCST90245836,GCST90245837,GCST90245838
http://purl.obolibrary.org/obo/OBA_2040471	GCST90234695
http://purl.obolibrary.org/obo/OBA_2040472	GCST90235187
http://www.ebi.ac.uk/efo/EFO_0009684	GCST90043752
http://purl.obolibrary.org/obo/OBA_2040473	GCST90233400
http://www.ebi.ac.uk/efo/EFO_0009685	GCST90084254,GCST90080268,GCST90246145
http://www.ebi.ac.uk/efo/EFO_0021521	GCST90243917
http://purl.obolibrary.org/obo/OBA_2040474	GCST90234665
http://www.ebi.ac.uk/efo/EFO_0009686	GCST90044085,GCST90080156,GCST90080157,GCST90084143,GCST90084142,GCST90129579,GCST90278684,GCST90278685,GCST90278686,GCST90246128
http://purl.obolibrary.org/obo/OBA_2040475	GCST90232830,GCST90235230
http://www.ebi.ac.uk/efo/EFO_0009687	GCST90079814,GCST90083800,GCST90246059
http://purl.obolibrary.org/obo/OBA_2040476	GCST90238418
http://www.ebi.ac.uk/efo/EFO_0009688	GCST90079555,GCST90083541,GCST90080178,GCST90084165,GCST90080179,GCST90084164,GCST90017195,GCST90017196,GCST90017197,GCST90017198
http://www.ebi.ac.uk/efo/EFO_0000584	GCST90081720,GCST90081721,GCST90077734,GCST90077735
http://purl.obolibrary.org/obo/OBA_2040477	GCST90233048,GCST90234433
http://www.ebi.ac.uk/efo/EFO_0021524	GCST90104595
http://www.ebi.ac.uk/efo/EFO_0009689	GCST90044246,GCST90044247,GCST90080608,GCST90080609,GCST90084595,GCST90084594,GCST90084596,GCST90080610
http://purl.obolibrary.org/obo/OBA_2040478	GCST90233631
http://www.ebi.ac.uk/efo/EFO_0021525	GCST90104597
http://purl.obolibrary.org/obo/OBA_2040479	GCST90235321
http://www.ebi.ac.uk/efo/EFO_0021527	GCST90100518,GCST90100539
http://www.ebi.ac.uk/efo/EFO_0000588	GCST002085
http://www.ebi.ac.uk/efo/EFO_0021528	GCST90100519,GCST90100540
http://www.ebi.ac.uk/efo/EFO_0000589	GCST90043664,GCST90043665,GCST90083766,GCST90083768,GCST90079782,GCST90079780,GCST90102531,GCST90102532,GCST90103393
http://purl.obolibrary.org/obo/OBA_2044360	GCST90236498
http://www.ebi.ac.uk/efo/EFO_0021529	GCST90100531,GCST90100552
http://purl.obolibrary.org/obo/OBA_2044361	GCST90239481
http://purl.obolibrary.org/obo/MONDO_0021400	GCST90080271,GCST90084257,GCST90018607,GCST90018827
http://purl.obolibrary.org/obo/OBA_2044362	GCST90238997
http://www.ebi.ac.uk/efo/EFO_0801750	GCST90241719,GCST90248217
http://purl.obolibrary.org/obo/OBA_2044363	GCST90235666
http://www.ebi.ac.uk/efo/EFO_0011010	GCST011372
http://www.ebi.ac.uk/efo/EFO_0801751	GCST90241720,GCST90248218
http://www.ebi.ac.uk/efo/EFO_0004471	GCST003659,GCST005178,GCST003658,GCST005221,GCST005216,GCST000077,GCST001762,GCST002726,GCST008781,GCST009642,GCST010558
http://purl.obolibrary.org/obo/OBA_2044364	GCST90236166
http://www.ebi.ac.uk/efo/EFO_0801752	GCST90241722,GCST90248221
http://www.ebi.ac.uk/efo/EFO_0011011	GCST90013303,GCST90082231,GCST90083316,GCST90079330,GCST90078245,GCST90309820
http://purl.obolibrary.org/obo/OBA_2044365	GCST90236653
http://www.ebi.ac.uk/efo/EFO_0801753	GCST90241728,GCST90248315
http://www.ebi.ac.uk/efo/EFO_0011012	GCST90013312,GCST90012670
http://www.ebi.ac.uk/efo/EFO_0011013	GCST011387,GCST011386,GCST011385,GCST011384,GCST011388,GCST90026991,GCST90026992,GCST90026993,GCST90026994,GCST90026995,GCST90026996,GCST90026997,GCST90026998,GCST90026999,GCST90027000,GCST90027001,GCST90027002,GCST90027003,GCST90027004,GCST90026988,GCST90026989,GCST90026666,GCST90026990,GCST90026983,GCST90026984,GCST90026985,GCST90027005,GCST90027006,GCST90027007,GCST90027008,GCST90026703,GCST90…
http://purl.obolibrary.org/obo/OBA_2044366	GCST90234886
http://www.ebi.ac.uk/efo/EFO_0801754	GCST90241736,GCST90248243
http://purl.obolibrary.org/obo/OBA_2044367	GCST90235908
http://www.ebi.ac.uk/efo/EFO_0011014	GCST011362,GCST011361
http://www.ebi.ac.uk/efo/EFO_0801755	GCST90241738,GCST90248236
http://purl.obolibrary.org/obo/OBA_2044368	GCST90235120
http://www.ebi.ac.uk/efo/EFO_0801756	GCST90241739,GCST90248237
http://www.ebi.ac.uk/efo/EFO_0011015	GCST90029012,GCST90029013,GCST90044291,GCST90044292,GCST90044293,GCST90044294,GCST90044295,GCST90044296,GCST90044297,GCST011358,GCST011357,GCST011356,GCST90082939,GCST90078953,GCST90100570,GCST90104204,GCST90095190,GCST012283,GCST012282,GCST011422,GCST011421,GCST90267548,GCST90267549,GCST90267550,GCST90267551,GCST90267552,GCST90267553,GCST90017139,GCST90017140,GCST90133140,GCST90133116,GCST901050…
http://purl.obolibrary.org/obo/OBA_2044369	GCST90233135
http://www.ebi.ac.uk/efo/EFO_0801757	GCST90241745
http://www.ebi.ac.uk/efo/EFO_0801758	GCST90241752
http://www.ebi.ac.uk/efo/EFO_0801759	GCST90241760,GCST90248339
http://www.ebi.ac.uk/efo/EFO_0011018	GCST011911,GCST90087740,GCST90087937,GCST90240466,GCST011378,GCST90100711,GCST90234151,GCST90161354,GCST90246684
http://www.ebi.ac.uk/efo/EFO_0008360	GCST90043276,GCST90043277,GCST90043284,GCST90043285,GCST90043286,GCST90043287,GCST90043288,GCST90043289,GCST90043290,GCST90043291,GCST90043292,GCST90043266,GCST90043267,GCST90043268,GCST90043269,GCST90043270,GCST90043271,GCST90043272,GCST90043273,GCST90043274,GCST90043275,GCST008669,GCST008670,GCST008671,GCST90319482,GCST90319483,GCST90319484,GCST90319485,GCST90319486,GCST90319473,GCST90319474,GC…
http://www.ebi.ac.uk/efo/EFO_0008361	GCST004800,GCST002348,GCST90041844,GCST90043278,GCST90043279,GCST90043280,GCST009238
http://purl.obolibrary.org/obo/OBA_2040930	GCST90233402
http://www.ebi.ac.uk/efo/EFO_0008362	GCST000934
http://purl.obolibrary.org/obo/OBA_2040931	GCST90234319
http://purl.obolibrary.org/obo/HP_0002240	GCST90084791,GCST90080805
http://purl.obolibrary.org/obo/OBA_2040932	GCST90234444
http://www.ebi.ac.uk/efo/EFO_0008364	GCST002131
http://purl.obolibrary.org/obo/OBA_2040933	GCST90239431
http://www.ebi.ac.uk/efo/EFO_0020200	GCST90100740,GCST90237627,GCST90162051,GCST90247048
http://www.ebi.ac.uk/efo/EFO_0008365	GCST004806,GCST004805
http://purl.obolibrary.org/obo/OBA_2040934	GCST90234881
http://www.ebi.ac.uk/efo/EFO_0020201	GCST90240513,GCST90100741,GCST90100743,GCST90237341,GCST90161740
http://www.ebi.ac.uk/efo/EFO_0008366	GCST004804,GCST004810,GCST004811,GCST004809,GCST004808
http://purl.obolibrary.org/obo/OBA_2040935	GCST90235064,GCST90239498
http://www.ebi.ac.uk/efo/EFO_0020202	GCST90240514,GCST90100742,GCST90161596,GCST90247056
http://www.ebi.ac.uk/efo/EFO_0008367	GCST004796
http://www.ebi.ac.uk/efo/EFO_0020203	GCST90161849,GCST90225700
http://purl.obolibrary.org/obo/OBA_2040936	GCST90236003
http://www.ebi.ac.uk/efo/EFO_0008368	GCST004797
http://purl.obolibrary.org/obo/OBA_2040937	GCST90239077
http://www.ebi.ac.uk/efo/EFO_0020204	GCST90240519,GCST90100744,GCST90237210,GCST90137810,GCST90161604,GCST90248516
http://www.ebi.ac.uk/efo/EFO_0008369	GCST004794
http://purl.obolibrary.org/obo/OBA_2040938	GCST90236005
http://www.ebi.ac.uk/efo/EFO_0020205	GCST90240522,GCST90100747,GCST90234039,GCST90237406,GCST90161814,GCST90247203
http://purl.obolibrary.org/obo/OBA_2040939	GCST90235190
http://www.ebi.ac.uk/efo/EFO_0020206	GCST90086908,GCST90240529,GCST90100751,GCST90237080,GCST90161463
http://purl.obolibrary.org/obo/HP_0002248	GCST90044208,GCST90084305,GCST90080319
http://www.ebi.ac.uk/efo/EFO_0020207	GCST90100752,GCST90237736,GCST90162173,GCST90246776
http://www.ebi.ac.uk/efo/EFO_0020208	GCST90100753,GCST90237124,GCST90161514,GCST90246788
http://purl.obolibrary.org/obo/OBA_2044820	GCST90236763
http://purl.obolibrary.org/obo/OBA_2043040	GCST90234960
http://www.ebi.ac.uk/efo/EFO_0020209	GCST90240530,GCST90100754,GCST90236793,GCST90234303,GCST90161367,GCST90085726,GCST90085797,GCST90246801
http://purl.obolibrary.org/obo/OBA_2043041	GCST90239369
http://purl.obolibrary.org/obo/OBA_2044821	GCST90238481
http://www.ebi.ac.uk/efo/EFO_0800430	GCST90139991,GCST90244959
http://purl.obolibrary.org/obo/OBA_2044822	GCST90233882
http://purl.obolibrary.org/obo/OBA_2043042	GCST90235121
http://www.ebi.ac.uk/efo/EFO_0800431	GCST90139992,GCST90244914
http://purl.obolibrary.org/obo/OBA_2044823	GCST90239185
http://purl.obolibrary.org/obo/OBA_2043043	GCST90236444
http://www.ebi.ac.uk/efo/EFO_0800432	GCST90139993,GCST90244913
http://purl.obolibrary.org/obo/OBA_2044824	GCST90238927
http://purl.obolibrary.org/obo/OBA_2043044	GCST90232938
http://www.ebi.ac.uk/efo/EFO_0800433	GCST90265526,GCST90139994,GCST90201475,GCST90203510,GCST90200049,GCST90202511,GCST90300382
http://purl.obolibrary.org/obo/OBA_2043045	GCST90239408
http://purl.obolibrary.org/obo/OBA_2044825	GCST90236149
http://www.ebi.ac.uk/efo/EFO_0800434	GCST90139995,GCST90244964,GCST90102746
http://www.ebi.ac.uk/efo/EFO_0021070	GCST90243432,GCST90299732
http://purl.obolibrary.org/obo/OBA_2043046	GCST90236544
http://purl.obolibrary.org/obo/OBA_2044826	GCST90236367
http://www.ebi.ac.uk/efo/EFO_0800435	GCST90265785,GCST90139996
http://www.ebi.ac.uk/efo/EFO_0021071	GCST90265774,GCST90243429,GCST90140221,GCST90245356,GCST90103120,GCST90201800,GCST90200397,GCST90203823,GCST90202834,GCST90299740
http://purl.obolibrary.org/obo/OBA_2043047	GCST90239574
http://purl.obolibrary.org/obo/OBA_2044827	GCST90236293
http://www.ebi.ac.uk/efo/EFO_0800436	GCST90139997
http://purl.obolibrary.org/obo/OBA_2044828	GCST90236629
http://purl.obolibrary.org/obo/OBA_2043048	GCST90238173,GCST90234413,GCST90179397
http://www.ebi.ac.uk/efo/EFO_0021072	GCST90134097,GCST90265776,GCST90243694,GCST90140223,GCST90245358,GCST90103121,GCST90201795,GCST90200388,GCST90202843,GCST90299741
http://www.ebi.ac.uk/efo/EFO_0800437	GCST90139998
http://www.ebi.ac.uk/efo/EFO_0021073	GCST90265801,GCST90243433,GCST90140234,GCST90200457,GCST90201861,GCST90202885,GCST90203874,GCST90300189
http://purl.obolibrary.org/obo/OBA_2043049	GCST90238903
http://purl.obolibrary.org/obo/OBA_2044829	GCST90236153
http://www.ebi.ac.uk/efo/EFO_0800438	GCST90265786,GCST90139999,GCST90103129,GCST90103130,GCST90300432
http://www.ebi.ac.uk/efo/EFO_0021074	GCST90265984,GCST90243431,GCST90140222,GCST90245432,GCST90103195,GCST90201793,GCST90200390,GCST90203824,GCST90202839,GCST90299783
http://www.ebi.ac.uk/efo/EFO_0800439	GCST90264272,GCST90140000,GCST90102726,GCST90201478,GCST90200080,GCST90202507,GCST90300426
http://www.ebi.ac.uk/efo/EFO_0021075	GCST90134188,GCST90265985,GCST90243743,GCST90139732,GCST90245433,GCST90103196,GCST90202164,GCST90199721,GCST90201119,GCST90203181,GCST90299784
http://www.ebi.ac.uk/efo/EFO_0021076	GCST90243674,GCST90128856,GCST90128998
http://www.ebi.ac.uk/efo/EFO_0021077	GCST90243808
http://www.ebi.ac.uk/efo/EFO_0021078	GCST90243754
http://www.ebi.ac.uk/efo/EFO_0007040	GCST004768,GCST004769,GCST006133,GCST006132,GCST002935,GCST002831,GCST90032170,GCST90100530,GCST90102512,GCST90100551
http://www.ebi.ac.uk/efo/EFO_0021079	GCST90243721,GCST90128997,GCST90128999,GCST90299587
http://www.ebi.ac.uk/efo/EFO_0007041	GCST007240,GCST007241
http://www.ebi.ac.uk/efo/EFO_0007042	GCST004284,GCST004283,GCST002839
http://www.ebi.ac.uk/efo/EFO_0007043	GCST006496
http://www.ebi.ac.uk/efo/EFO_0007044	GCST002958,GCST90092524,GCST90092525,GCST90092526,GCST90092518,GCST90092519,GCST90092520,GCST90092521,GCST90092522,GCST90092523,GCST90085702,GCST90085703,GCST90085704,GCST90092527,GCST90092528,GCST90092529,GCST90102560,GCST90102578,GCST90102566,GCST90102584,GCST90102572,GCST90102590
http://www.ebi.ac.uk/efo/EFO_0007046	GCST002849
http://www.ebi.ac.uk/efo/EFO_0007047	GCST007726,GCST90082879,GCST90078893,GCST90295882,GCST90295883,GCST90295884,GCST90295885,GCST90295886,GCST90295887,GCST90295888,GCST90295889,GCST002812,GCST90006925,GCST006338
http://purl.obolibrary.org/obo/MONDO_0004822	GCST90081663,GCST90081664,GCST90044075,GCST90077678,GCST90078865,GCST90077677,GCST90082851,GCST90080142,GCST90084128,GCST90018581,GCST90018801,GCST90246124
http://www.ebi.ac.uk/efo/EFO_0007048	GCST90078890,GCST90078891,GCST90078892,GCST90082876,GCST90082877,GCST90082878,GCST90294264,GCST90006902,GCST90006903,GCST90006905
http://purl.obolibrary.org/obo/OBA_2043500	GCST90236424
http://purl.obolibrary.org/obo/OBA_2043501	GCST90232875
http://www.ebi.ac.uk/efo/EFO_0009690	GCST90038598,GCST90080616,GCST90044210,GCST90044229,GCST90044248,GCST90044249,GCST90044254,GCST90044256,GCST90044275,GCST90080592,GCST90084578,GCST90084579,GCST90084580,GCST90080614,GCST90080593,GCST90080615,GCST90080595,GCST90084602,GCST90084600,GCST90084601,GCST90080594,GCST90084581,GCST90103424,GCST90246187
http://purl.obolibrary.org/obo/OBA_2043502	GCST90236519
http://www.ebi.ac.uk/efo/EFO_0009691	GCST90081820,GCST90081821,GCST90043832,GCST90077834,GCST90077835,GCST90083929,GCST90079943,GCST90246079
http://purl.obolibrary.org/obo/OBA_2043503	GCST90233396
http://purl.obolibrary.org/obo/OBA_2040480	GCST90236457
http://www.ebi.ac.uk/efo/EFO_0009692	GCST90084853,GCST90084851,GCST90084852,GCST90080865,GCST90080866,GCST90080867
http://purl.obolibrary.org/obo/OBA_2043504	GCST90233623
http://www.ebi.ac.uk/efo/EFO_0009693	GCST007149,GCST007150,GCST007151,GCST007148
http://purl.obolibrary.org/obo/OBA_2040481	GCST90234694
http://purl.obolibrary.org/obo/OBA_2043505	GCST90236716
http://purl.obolibrary.org/obo/OBA_2040482	GCST90235767
http://www.ebi.ac.uk/efo/EFO_0009694	GCST007161
http://purl.obolibrary.org/obo/OBA_2043506	GCST90235901
http://purl.obolibrary.org/obo/OBA_2040483	GCST90238074,GCST90179215
http://www.ebi.ac.uk/efo/EFO_0021530	GCST90100533,GCST90100554
http://www.ebi.ac.uk/efo/EFO_0009695	GCST009524,GCST009523,GCST012283,GCST012282,GCST007155
http://purl.obolibrary.org/obo/OBA_2043507	GCST90238889
http://www.ebi.ac.uk/efo/EFO_0009696	GCST007156,GCST90102529,GCST90102530,GCST90093145,GCST90093148,GCST90093151,GCST90093154,GCST90093157,GCST90093160,GCST90093163,GCST90093166,GCST90093193,GCST90093196,GCST90093199,GCST90093202,GCST90093205,GCST90093208,GCST90093211,GCST90093214,GCST90093217,GCST90093244,GCST90093247,GCST90093250,GCST90093253,GCST90093256,GCST90093259,GCST90093262,GCST90093265,GCST90093169,GCST90093172,GCST9009317…
http://purl.obolibrary.org/obo/OBA_2040484	GCST90238153
http://www.ebi.ac.uk/efo/EFO_0021531	GCST90100534,GCST90100555
http://purl.obolibrary.org/obo/OBA_2040485	GCST90235219
http://purl.obolibrary.org/obo/OBA_2043508	GCST90233004
http://www.ebi.ac.uk/efo/EFO_0021532	GCST90100535,GCST90100556
http://purl.obolibrary.org/obo/OBA_2040486	GCST90232894
http://purl.obolibrary.org/obo/OBA_2043509	GCST90235674
http://www.ebi.ac.uk/efo/EFO_0021533	GCST90100536,GCST90100557
http://www.ebi.ac.uk/efo/EFO_0009698	GCST007179,GCST007180,GCST007181,GCST007182,GCST007183,GCST007184,GCST007185,GCST007186,GCST010720,GCST010719,GCST010718
http://purl.obolibrary.org/obo/OBA_2040487	GCST90234715
http://www.ebi.ac.uk/efo/EFO_0021534	GCST90104785
http://www.ebi.ac.uk/efo/EFO_0009699	GCST008544,GCST008542,GCST008539,GCST007304
http://www.ebi.ac.uk/efo/EFO_0021535	GCST90104806,GCST90104807
http://purl.obolibrary.org/obo/OBA_2040488	GCST90236835
http://purl.obolibrary.org/obo/OBA_2040489	GCST90239493
http://www.ebi.ac.uk/efo/EFO_0021536	GCST90128542,GCST90104793,GCST90104792
http://www.ebi.ac.uk/efo/EFO_0021537	GCST90129345,GCST90129346,GCST90129347,GCST90129348,GCST90129349,GCST90129350,GCST90129351,GCST90129352,GCST90129353,GCST90129354,GCST90129355,GCST90129356,GCST90129357,GCST90129358,GCST90129359,GCST90129360,GCST90129361,GCST90129362,GCST90129363,GCST90129364,GCST90129365,GCST90129366,GCST90129367,GCST90129368,GCST90129369,GCST90129370,GCST90129371,GCST90129372,GCST90129373,GCST90129374,GCST90129…
http://www.ebi.ac.uk/efo/EFO_0803000	GCST90242607,GCST90249180
http://purl.obolibrary.org/obo/OBA_2044370	GCST90233900
http://www.ebi.ac.uk/efo/EFO_0803001	GCST90242608,GCST90249181
http://purl.obolibrary.org/obo/OBA_2044371	GCST90236463
http://www.ebi.ac.uk/efo/EFO_0803002	GCST90242609,GCST90249182
http://purl.obolibrary.org/obo/OBA_2044372	GCST90236174
http://www.ebi.ac.uk/efo/EFO_0803003	GCST90242610,GCST90249273
http://www.ebi.ac.uk/efo/EFO_0801760	GCST90241762,GCST90241763,GCST90248334
http://www.ebi.ac.uk/efo/EFO_0007503	GCST90043813,GCST90079935,GCST90083921,GCST90018589,GCST90018809
http://purl.obolibrary.org/obo/OBA_2044373	GCST90233549
http://www.ebi.ac.uk/efo/EFO_0803004	GCST90242613,GCST90249275
http://www.ebi.ac.uk/efo/EFO_0801761	GCST90241775,GCST90248316
http://purl.obolibrary.org/obo/OBA_2044374	GCST90236416
http://www.ebi.ac.uk/efo/EFO_0011021	GCST011402,GCST011400
http://www.ebi.ac.uk/efo/EFO_0803005	GCST90242616
http://www.ebi.ac.uk/efo/EFO_0801762	GCST90241776
http://purl.obolibrary.org/obo/OBA_2044375	GCST90236570
http://www.ebi.ac.uk/efo/EFO_0011022	GCST011401,GCST011399
http://www.ebi.ac.uk/efo/EFO_0803006	GCST90242619,GCST90249305
http://www.ebi.ac.uk/efo/EFO_0801763	GCST90241781,GCST90248324
http://purl.obolibrary.org/obo/OBA_2044376	GCST90235408
http://www.ebi.ac.uk/efo/EFO_0803007	GCST90242622
http://www.ebi.ac.uk/efo/EFO_0011023	GCST90044647,GCST011408
http://www.ebi.ac.uk/efo/EFO_0801764	GCST90241786,GCST90274819,GCST90248284,GCST90244838
http://purl.obolibrary.org/obo/OBA_2044377	GCST90238523
http://www.ebi.ac.uk/efo/EFO_0803008	GCST90242626,GCST90249280
http://purl.obolibrary.org/obo/MONDO_0021416	GCST90104149,GCST90018626,GCST90018846
http://www.ebi.ac.uk/efo/EFO_0801765	GCST90241789,GCST90248298
http://purl.obolibrary.org/obo/MONDO_0000481	GCST90027049
http://purl.obolibrary.org/obo/OBA_2044378	GCST90232997
http://www.ebi.ac.uk/efo/EFO_0801766	GCST90241790,GCST90241791,GCST90248299
http://www.ebi.ac.uk/efo/EFO_0803009	GCST90242631
http://purl.obolibrary.org/obo/OBA_2044379	GCST90234747
http://www.ebi.ac.uk/efo/EFO_0801767	GCST90241792,GCST90248300
http://purl.obolibrary.org/obo/HP_0030680	GCST011984
http://www.ebi.ac.uk/efo/EFO_0801768	GCST90241797,GCST90248304
http://www.ebi.ac.uk/efo/EFO_0801769	GCST90241798,GCST90248305
http://www.ebi.ac.uk/efo/EFO_0008370	GCST004795
http://www.ebi.ac.uk/efo/EFO_0008371	GCST004806,GCST004812
http://purl.obolibrary.org/obo/OBA_2040940	GCST90239133
http://www.ebi.ac.uk/efo/EFO_0008372	GCST004813
http://purl.obolibrary.org/obo/OBA_2040941	GCST90235941,GCST90179250
http://www.ebi.ac.uk/efo/EFO_0008373	GCST009395,GCST90006790,GCST90006791,GCST010617,GCST011209,GCST011204,GCST010125,GCST90101736,GCST90268125,GCST90268128,GCST90268134,GCST90268137
http://purl.obolibrary.org/obo/OBA_2040942	GCST90232964
http://www.ebi.ac.uk/efo/EFO_0008374	GCST004807
http://purl.obolibrary.org/obo/OBA_2040943	GCST90237992
http://www.ebi.ac.uk/efo/EFO_0020210	GCST90240531,GCST90240532,GCST90100755,GCST90235250,GCST90238892,GCST90161879
http://www.ebi.ac.uk/efo/EFO_0008375	GCST004802,GCST006976
http://purl.obolibrary.org/obo/OBA_2040944	GCST90235486,GCST90235487
http://purl.obolibrary.org/obo/HP_0002253	GCST007921
http://www.ebi.ac.uk/efo/EFO_0020211	GCST90240533,GCST90240534,GCST90100756,GCST90233131,GCST90237930,GCST90162398,GCST90246803
http://purl.obolibrary.org/obo/OBA_2040945	GCST90234875
http://www.ebi.ac.uk/efo/EFO_0020212	GCST90240535,GCST90100757,GCST90237489,GCST90161903,GCST90179256
http://www.ebi.ac.uk/efo/EFO_0008377	GCST004861,GCST004862,GCST004865
http://purl.obolibrary.org/obo/OBA_2040946	GCST90235291
http://www.ebi.ac.uk/efo/EFO_0020213	GCST90240536,GCST90100758,GCST90237031,GCST90137667,GCST90161411,GCST90225862,GCST90246805
http://www.ebi.ac.uk/efo/EFO_0008378	GCST004862,GCST004863,GCST004865
http://purl.obolibrary.org/obo/OBA_2040947	GCST90235730
http://www.ebi.ac.uk/efo/EFO_0020214	GCST90100760,GCST90234521,GCST90237435,GCST90137933,GCST90161843,GCST90246807
http://www.ebi.ac.uk/efo/EFO_0008379	GCST004824
http://purl.obolibrary.org/obo/OBA_2040948	GCST90234707
http://www.ebi.ac.uk/efo/EFO_0020215	GCST90240546,GCST90100762,GCST90234431,GCST90161880,GCST90246831
http://purl.obolibrary.org/obo/OBA_2040949	GCST90232905
http://www.ebi.ac.uk/efo/EFO_0020216	GCST90240551,GCST90100763,GCST90236659,GCST90161361,GCST90246833
http://www.ebi.ac.uk/efo/EFO_0020217	GCST90240554,GCST90100764,GCST90235027,GCST90161950,GCST90246828
http://www.ebi.ac.uk/efo/EFO_0020218	GCST90240557,GCST90100767,GCST90237333,GCST90161732
http://purl.obolibrary.org/obo/OBA_2043050	GCST90236927
http://purl.obolibrary.org/obo/OBA_2044830	GCST90232952
http://www.ebi.ac.uk/efo/EFO_0020219	GCST90240558,GCST90100768,GCST90237334,GCST90161733
http://purl.obolibrary.org/obo/OBA_2043051	GCST90239036
http://purl.obolibrary.org/obo/OBA_2044831	GCST90236473
http://www.ebi.ac.uk/efo/EFO_0800440	GCST90140001,GCST90244855,GCST90102635,GCST90201479,GCST90203521,GCST90200075,GCST90202509
http://purl.obolibrary.org/obo/OBA_2043052	GCST90234969
http://purl.obolibrary.org/obo/OBA_2044832	GCST90233067
http://www.ebi.ac.uk/efo/EFO_0800441	GCST90140002
http://purl.obolibrary.org/obo/OBA_2043053	GCST90233795
http://purl.obolibrary.org/obo/OBA_2044833	GCST90238513
http://www.ebi.ac.uk/efo/EFO_0800442	GCST90140003
http://purl.obolibrary.org/obo/OBA_2044834	GCST90239204
http://purl.obolibrary.org/obo/OBA_2043054	GCST90236471
http://www.ebi.ac.uk/efo/EFO_0800443	GCST90264249,GCST90140004,GCST90201480,GCST90203525,GCST90200082,GCST90202517
http://purl.obolibrary.org/obo/OBA_2044835	GCST90233015
http://purl.obolibrary.org/obo/OBA_2043055	GCST90234476
http://www.ebi.ac.uk/efo/EFO_0800444	GCST90140005
http://www.ebi.ac.uk/efo/EFO_0021080	GCST90243725
http://purl.obolibrary.org/obo/OBA_2044836	GCST90238525
http://purl.obolibrary.org/obo/OBA_2043056	GCST90238662
http://www.ebi.ac.uk/efo/EFO_0021081	GCST90243720,GCST90129014,GCST90128988,GCST90299596
http://www.ebi.ac.uk/efo/EFO_0800445	GCST90264217,GCST90140006,GCST90244909,GCST90300372
http://purl.obolibrary.org/obo/OBA_2044837	GCST90236875
http://purl.obolibrary.org/obo/OBA_2043057	GCST90238255
http://www.ebi.ac.uk/efo/EFO_0800446	GCST90140007,GCST90102738
http://www.ebi.ac.uk/efo/EFO_0021082	GCST90243739,GCST90129015,GCST90128993
http://purl.obolibrary.org/obo/OBA_2044838	GCST90236651
http://purl.obolibrary.org/obo/OBA_2043058	GCST90238277
http://www.ebi.ac.uk/efo/EFO_0800447	GCST90140008,GCST90102739
http://www.ebi.ac.uk/efo/EFO_0021083	GCST90243781,GCST90128987,GCST90129025
http://purl.obolibrary.org/obo/OBA_2043059	GCST90238011
http://purl.obolibrary.org/obo/OBA_2044839	GCST90236009
http://www.ebi.ac.uk/efo/EFO_0800448	GCST90140009,GCST90102695
http://www.ebi.ac.uk/efo/EFO_0021084	GCST90243611,GCST90128857
http://www.ebi.ac.uk/efo/EFO_0021085	GCST90243833,GCST90128984,GCST90129027,GCST90300118
http://www.ebi.ac.uk/efo/EFO_0800449	GCST90264248,GCST90140010,GCST90244925,GCST90102708,GCST90201477,GCST90203523,GCST90200081,GCST90202520,GCST90300499
http://purl.obolibrary.org/obo/HP_0011446	GCST90043697
http://www.ebi.ac.uk/efo/EFO_0021086	GCST90243740,GCST90128989,GCST90129029
http://www.ebi.ac.uk/efo/EFO_0021087	GCST90243834
http://www.ebi.ac.uk/efo/EFO_0021088	GCST90243675,GCST90129030,GCST90128982
http://www.ebi.ac.uk/efo/EFO_0007050	GCST002812,GCST002815,GCST006334
http://www.ebi.ac.uk/efo/EFO_0021089	GCST90243738,GCST90129031,GCST90128995
[truncated: 13,218 more rows]

## Sheet: Table S3a
Trait	Ancestry	Largest GWAS sample size	Number of significant association signals produced by each analysis
			Largest GWAS	Any GWAS	Any GWAS but not the largest GWAS	Uncorrected meta-analysis	Uncorrected meta-analysis but not the largest GWAS	Overlap-corrected meta-analysis	Overlap-corrected meta-analysis but not the largest GWAS	Largest GWAS but not the overlap-corrected meta-analysis
2hrG	EU	133010	7	7	0	18	11	7	1	1
AD	EU	487511	64	73	9	92	40	71	17	10
ADHD	EU	32012	3	3	0	9	8	4	3	2
Adiponectin	EU	7193	0	8	8	8	8	6	6	0
AF	EU	537409	103	103	0	118	17	107	9	5
AFR	EU	116138	21	30	9	871	850	21	0	0
AHI	EU	10110	0	1	1	2338	2338	2	2	0
AHIinNREM	EU	10110	0	1	1	1010	1010	0	0	0
AHIinREM	EU	10110	0	1	1	1089	1089	0	0	0
Alb	EU	459135	390	391	1	248	8	391	16	15
ALBUMIN	EU	3414	29	29	0	19	1	29	0	0
allDKD	EU	47140	2	2	0	3	1	1	0	1
AllergicRhinitis	EU	56637	3	3	0	6	3	3	0	0
Allergy	EU	360838	79	80	1	187	108	85	8	2
ALLOA	EU	455221	37	37	0	199	163	33	10	14
ALP	EU	459135	412	483	71	2692	2283	391	30	51
ALS	EU	138086	13	14	1	390	377	14	2	1
ALT	EA	288127	69	71	2	238	169	61	3	11
ALT	EU	459135	299	374	75	2259	1960	305	35	29
AMD	EU	342499	27	27	0	32	7	22	2	7
AnyCVD	EU	56637	2	2	0	6	4	2	0	0
Ap-LM	EU	450243	1219	1245	26	4879	3660	1244	45	20
ApoB	EU	459135	655	656	1	659	4	657	2	0
AscAortaDiam	EU	41135	78	88	10	773	695	86	8	0
AST	EA	288127	81	81	0	264	183	73	3	11
AST	EU	459135	377	406	29	991	620	390	16	3
Asthma_AdultOnset	EU	394283	16	46	30	241	225	43	27	0
Asthma	EA	341204	32	32	0	125	93	34	4	2
Asthma	EU	1376071	135	174	39	5770	5635	194	78	19
Asthma_ChildhoodOnset	EU	394283	53	103	50	370	317	99	47	1
BackPain	EU	453862	23	25	2	525	502	23	4	4
BarretsEsophagus	EU	602604	17	18	1	75	58	15	1	3
BasoCount	EU	563946	260	288	28	2568	2308	267	40	33
BasoPerc	EU	459135	190	219	29	860	670	211	23	2
BFP	EU	155961	72	75	3	986	914	77	11	6
BILIRUBIN	EU	459135	282	306	24	717	436	266	13	29
BIP	EU	51710	16	23	7	99	83	22	12	6
BMIadjSMK	EU	209894	54	55	1	462	408	52	1	3
BMI	EA	191764	70	72	2	4695	4625	73	4	1
BMI	EU	795640	425	542	117	9877	9452	515	120	30
BMI	HS	59771	15	15	0	18	4	16	1	0
BMI	SA	17348	5	5	0	7	2	7	2	0
BS	EU	518615	112	161	49	1733	1621	153	45	4
BUN	EU	110517	71	71	0	90	21	70	0	1
Ca	EU	459135	350	366	16	1379	1029	352	19	17
CAD	EA	168228	58	60	2	94	36	67	11	2
CAD	EU	1347212	212	228	16	1918	1706	219	21	14
CADinT1D	EU	4869	2	3	1	4	2	2	0	0
Cancer	EU	56637	12	12	0	15	3	12	0	0
CD	EU	86640	49	99	50	380	331	93	44	0
CHOL	AF	99432	108	108	0	112	4	108	0	0
CHOL	EA	288127	120	134	14	497	378	153	35	2
CHOL	EU	1320016	485	520	35	919	447	429	62	118
CHOL	HS	49582	36	36	0	38	3	38	2	0
CHOL	SA	40963	21	22	1	36	15	31	10	0
CHOL	SSAF	24616	16	19	3	308	296	16	2	2
cIMT	SSAF	7894	2	5	3	645	643	2	0	0
Cirrhosis	EU	406638	4	8	4	16	12	9	6	1
CKD	EU	133413	4	24	20	39	35	26	22	0
CKD_DM	EU	26785	2	2	0	37	35	2	0	0
CKDpDKD_T1D	EU	19327	1	1	0	9	8	0	0	1
CKD_T1D	EU	19327	2	2	0	3	1	3	1	0
Creatinine	EA	191764	68	68	0	68	0	68	0	0
Creatinine	EU	459135	731	733	2	727	46	717	16	30
CreatinineUrinary	EU	7119	1	2	1	2	1	1	0	0
CRP	EU	459135	327	362	35	1005	689	286	31	72
DBP	EA	191764	18	18	0	19	1	19	1	0
DBP	EU	757601	410	500	90	4223	3813	450	88	48
DBP	SA	17348	1	1	0	1	0	1	0	0
Dermatophytosis	EU	56637	0	0	0	4	4	0	0	0
DiabeticNephro	EU	96499	5	5	0	4	0	4	0	1
DiabeticRetino	EU	96499	7	7	0	5	0	7	0	0
DirectBilirubin	EU	459135	190	193	3	608	418	155	1	36
Dyslipid	EU	56637	30	30	0	33	3	29	0	1
eBMD	EU	426824	712	715	3	1601	891	700	31	43
Eczema	EU	342499	40	46	6	64	29	53	21	8
eGFRcrea	EA	191764	72	72	0	73	1	73	1	0
eGFRcrea	EU	133413	47	245	198	399	352	248	201	0
eGFRcreaInDiabetes	EU	1142422	29	29	0	38	9	29	2	2
eGFRcreaNoDiabetes	EU	1142422	510	510	0	569	71	522	17	5
EosinCount	EU	563946	641	734	93	5629	4988	687	68	22
EosinPerc	EU	459135	700	753	53	2193	1493	722	46	24
ESRDvControl_T1D	EU	19327	1	1	0	9	8	1	0	0
ESRDvNonESRD_DM	EU	26785	1	2	1	42	41	2	1	0
ESRDvNonESRD_T1D	EU	19327	1	1	0	8	7	1	0	0
Estradiol	EU	206927	22	23	1	86	64	23	1	0
EtOH	EU	20032	1	1	0	1	0	1	0	0
FBW	EU	406063	187	188	1	592	405	153	4	38
FEV1	EU	400102	344	359	15	2087	1743	338	3	9
FEV1toFVC	EU	400102	405	437	32	1777	1372	409	8	4
FGadjBMI	EA	35619	15	15	0	40	28	15	0	0
FGadjBMI	EU	200622	74	74	0	1943	1870	80	8	2
FG	EA	288127	76	76	0	78	2	77	1	0
FG	EU	151188	47	52	5	1516	1469	43	4	8
FIadjBMI	EA	35619	0	0	0	1956	1956	0	0	0
FIadjBMI	EU	200622	42	43	1	5976	5939	41	4	5
FI	EA	6742	0	0	0	1	1	0	0	0
FI	EU	151188	14	21	7	1624	1610	13	2	3
FNBMD	EU	32965	22	25	3	73	51	33	11	0
FVC	EU	400102	325	340	15	1976	1651	324	7	8
GGT	EA	288127	116	118	2	319	203	111	9	14
GGT	EU	459135	407	517	110	2929	2522	453	59	13
HBA1CadjBMI	EA	35619	22	23	1	176	154	21	2	3
HBA1CadjBMI	EU	200622	96	96	0	1685	1597	96	0	0
HBA1C	AA	7564	3	4	1	4	1	4	1	0
HBA1C	EA	288127	86	89	3	204	119	86	5	5
HBA1C	EU	459135	425	522	97	1649	1224	483	75	17
HBA1C	SA	8874	9	10	1	9	1	10	1	0
HbConc	EU	563946	610	683	73	4974	4364	639	65	36
HCC	EU	406638	4	4	0	6	4	1	0	3
HDL	AF	99432	84	84	0	87	3	84	0	0
HDL	EA	288127	110	116	6	408	299	126	22	6
HDL	EU	1320016	400	462	62	1429	1034	447	94	47
HDL	HS	49582	34	36	2	39	5	35	1	0
HDL	SA	40963	20	23	3	38	18	29	9	0
HDL	SSAF	24616	10	11	1	341	331	9	1	2
HEIGHT	AA	293593	156	200	44	1836	1687	117	18	57
HEIGHT	EA	472730	512	512	0	510	4	513	5	4
HEIGHT	EU	4080687	418	509	91	2772	2355	364	33	87
HEIGHT	HS	455180	75	81	6	246	171	84	16	7
HEIGHT	SA	77890	25	25	0	32	7	27	2	0
Hematocrit	EU	563946	697	734	37	2520	1823	712	43	28
Hemorrhoids	EU	56637	1	1	0	8	7	1	0	0
HerniaAbdomin	EU	56637	5	5	0	8	3	5	0	0
HF	EU	1020441	15	19	4	150	136	22	9	2
HighScatReticuloCount	EU	459135	504	639	135	1825	1325	603	136	37
HighScatReticuloPerc	EU	459135	484	621	137	1807	1327	595	137	26
HIPCadjBMI	EU	232101	89	97	8	958	869	89	6	6
HIPC	EU	232101	55	60	5	882	827	58	4	1
HIPOA	EU	455221	30	30	0	54	25	29	3	4
HOMAB	EU	46186	4	4	0	4	0	4	0	0
HOMAIR	EU	46186	0	0	0	1	1	1	1	0
HR	EU	458969	399	404	5	441	73	384	17	32
HYPERTENSION	EU	458969	308	309	1	453	151	346	56	18
IBD	EU	86640	67	141	74	495	428	107	40	0
IBS	EU	486601	7	8	1	32	25	5	0	2
IGF1	EU	459135	689	691	2	447	11	684	17	22
ImReticuloFrac	EU	459135	389	469	80	1396	1011	461	83	11
Intelligence	EU	269867	210	212	2	29	0	32	0	178
IPF	EU	953873	14	38	24	16	8	38	25	1
IronDef	EU	56637	0	0	0	6	6	0	0	0
KNEEOA	EU	455221	14	14	0	50	36	12	0	2
LateAD	EU	63926	17	18	1	128	111	19	2	0
lateDKD_T1D	EU	19327	2	2	0	5	3	2	0	0
LDL	AF	99432	110	110	0	111	2	110	0	0
LDL	EA	288127	89	93	4	223	134	111	22	0
LDL	EU	1320016	345	410	65	3139	2794	369	82	58
LDL	HS	49582	22	22	0	27	5	25	3	0
LDL	SA	40963	17	18	1	31	14	24	7	0
LDL	SSAF	24616	13	13	0	318	308	10	0	3
LEPadjBMI	EU	32161	0	5	5	22	22	5	5	0
LEP	EU	32161	2	4	2	21	19	7	5	0
LFR	EU	116138	24	38	14	842	818	25	1	0
LowGripEWGSOP	EU	256523	23	27	4	569	546	23	1	1
LowGripFNIH	EU	256523	8	9	1	527	519	10	2	0
LSBMD	EU	32965	25	31	6	94	69	35	10	0
LVEDV	EU	41135	20	28	8	582	562	26	10	4
LVEDVI	EU	41135	12	19	7	247	235	17	8	3
LVEF	EU	41135	19	29	10	206	187	31	12	0
LVESV	EU	41135	25	39	14	424	399	40	16	1
LVESVI	EU	41135	24	33	9	218	194	34	12	2
LymphoCount	EU	563946	649	734	85	5565	4916	708	78	19
LymphoPerc	EU	459135	554	613	59	2146	1593	590	59	23
MA_DM	EU	26785	3	3	0	51	48	3	0	0
MA_T1D	EU	19327	5	5	0	7	2	5	0	0
MBW	EU	406063	90	90	0	205	115	74	2	18
MDD	EU	322580	13	17	4	117	111	24	17	6
MeanCorpHb	EU	563946	560	669	109	4914	4354	634	86	12
MeanCorpHbConc	EU	563946	284	310	26	3015	2731	285	27	26
MeanCorpVol	EU	563946	663	764	101	5027	4364	729	91	25
MeanReticuloVol	EU	459135	507	636	129	1760	1253	612	117	12
MeanSpheredVol	EU	459135	418	637	219	1718	1301	593	178	3
MI	EU	639221	87	102	15	177	91	141	56	2
MonoCount	EU	563946	655	718	63	5229	4574	689	60	26
MonoPerc	EU	459135	602	678	76	1904	1302	656	71	17
MultipleSclerosis	EU	26621	23	57	34	39	19	34	15	4
NAFLD	EU	778614	4	9	5	125	121	9	5	0
Neuroticism	EU	329821	81	82	1	68	16	77	13	17
NeutCount	EU	563946	585	675	90	5303	4718	616	64	33
NeutroPerc	EU	459135	530	603	73	2003	1473	584	67	13
nonHDL	AF	99432	32	33	1	40	8	33	1	0
nonHDL	EA	147492	75	75	0	77	2	77	2	0
nonHDL	EU	1320016	661	661	0	677	16	665	4	0
nonHDL	HS	49582	17	18	1	21	4	18	1	0
nonHDL	SA	40963	17	17	0	23	6	17	0	0
Osteoporosis	EU	56637	6	6	0	13	7	6	0	0
ParentalLongevity_AtDeath	EU	415311	8	8	0	27	19	8	1	1
Parkinsons	EU	110616	26	32	6	224	199	23	3	6
PaternalLongevity_AtDeath	EU	415311	5	5	0	17	12	6	2	1
PEF	EU	400102	265	283	18	1414	1149	274	10	1
PepticUlcers	EU	56637	0	0	0	2	2	0	0	0
PI	EU	45861	35	36	1	44	9	34	1	2
PlatCount	EU	563946	710	815	105	5704	4995	759	68	19
PlatCrit	EU	459135	763	851	88	2400	1637	854	105	14
PlatDistWidth	EU	459135	639	689	50	1956	1320	671	64	32
PlatVol	EU	563946	457	676	219	5090	4633	615	161	3
POAG	EA	269960	9	15	6	197	188	14	6	1
POAG	EU	1172905	40	82	42	626	586	105	66	1
Psychiatric	EU	56637	1	1	0	7	6	1	0	0
PulsePress	EU	757601	445	474	29	697	265	462	37	20
PVD	EU	56637	3	3	0	6	3	3	0	0
RA	EU	77440	2	4	2	223	221	2	0	0
RAQT	EU	77440	0	1	1	306	306	0	0	0
RBCDistWidth	EU	563946	506	594	88	5766	5260	553	68	21
RedCount	EU	563946	583	695	112	8961	8378	638	89	34
ReticuloCount	EU	459135	473	611	138	1807	1337	575	128	26
ReticuloPerc	EU	459135	477	609	132	1788	1313	590	128	15
RhA	EA	173633	36	37	1	104	68	31	0	5
RhA	EU	291471	6	73	67	109	103	78	73	1
RNFL	EU	33129	39	52	13	157	119	48	11	2
SBP	EA	191764	26	26	0	27	1	26	0	0
SBP	EU	757601	469	559	90	3426	2957	531	97	35
SBP	SA	17348	2	2	0	2	0	2	0	0
SeropositiveRhA	EU	342499	19	83	64	113	94	108	89	0
SHBGadjBMI	EU	425097	698	730	32	2617	1919	717	31	12
SHBG	EU	459135	450	577	127	5781	5331	547	105	8
SleepDuration	EU	453379	82	91	9	99	30	86	19	15
SleepInsomnia	EU	453379	46	53	7	1349	1303	33	14	27
SmokingFGmain	AA	4824	0	0	0	1	1	0	0	0
SmokingFGmain	EU	18365	5	5	0	10	5	6	1	0
SmokingT2Dmain	AA	4824	0	9	9	7	7	1	1	0
SmokingT2Dmain	EU	18365	5	11	6	15	10	5	0	0
Snoring	EU	408317	43	45	2	972	929	43	0	0
Stress	EU	56637	0	0	0	4	4	0	0	0
Stroke	AA	23991	0	1	1	519	519	1	1	0
Stroke	EU	1308460	24	26	2	165	141	26	5	3
Stroke_deep	EU	967	0	1	1	335	335	0	0	0
Stroke_hemorrhagic	EU	96499	1	1	0	324	323	1	0	0
Stroke_ischemic	AF	25577	1	1	0	4	3	2	1	0
Stroke_ischemic	EA	268930	5	5	0	127	122	7	2	0
Stroke_ischemic	EU	1308460	26	35	9	503	477	32	9	3
Stroke_ischemic	HS	29770	0	1	1	0	0	1	1	0
Stroke_lobar	EU	967	1	1	0	319	319	0	0	1
SVI	EU	41135	10	12	2	198	188	11	2	1
SVL	EU	41135	11	14	3	236	225	15	4	0
T1D	EU	520580	81	150	69	497	417	120	44	5
T2DadjBMI	EU	898130	162	164	2	300	141	163	19	18
T2D	AA	23827	1	1	0	1	0	1	0	0
T2D	EA	433540	189	205	16	3604	3415	202	19	6
T2D	EU	933970	188	248	60	2951	2763	241	72	19
T2D	HS	8891	3	3	0	12	9	3	0	0
T2D	SA	50533	25	27	2	352	329	36	13	2
TB-LM	EU	155961	656	672	16	2920	2264	680	38	14
Testosterone_bioavailable	EU	425097	141	288	147	1025	884	184	45	2
Testosterone_total	EU	425097	205	431	226	986	781	260	56	1
TFR	EU	116138	34	55	21	883	849	33	0	1
TG	AF	99432	78	78	0	80	2	79	1	0
TG	EA	288127	106	109	3	294	191	126	23	3
TG	EU	1320016	432	461	29	1725	1295	436	78	74
TG	HS	49582	36	37	1	48	12	38	2	0
TG	SA	40963	18	19	1	35	17	22	4	0
TG	SSAF	24616	10	10	0	314	307	7	0	3
toastCE	EU	446696	4	4	0	101	97	4	0	0
toastLAA	EU	446696	4	5	1	147	143	3	0	1
toastSAO	EU	446696	0	0	0	138	138	0	0	0
UACR	EU	547361	61	82	21	5466	5405	60	9	10
UC	EU	86640	37	69	32	377	340	62	25	0
Urate	EU	459135	412	478	66	627	220	457	79	34
VaricoseVeins	EU	207055	51	53	2	65	18	58	13	6
VitD	EU	496946	128	158	30	619	492	148	34	14
WAISTadjBMI	EU	232101	72	79	7	889	817	72	7	7
WAIST	EU	232101	45	109	64	3927	3882	84	59	20
WBC	EU	563946	752	838	86	5505	4753	796	77	33
WCadjBMISMK	EU	209894	56	66	10	395	339	63	8	1
WEIGHT	EU	459135	853	853	0	874	45	791	18	80
WHRadjBMI	EU	694649	379	444	65	3604	3225	382	31	28
WHRadjBMISMK	EU	209894	30	39	9	281	252	31	3	2
WHR	EU	694649	373	435	62	5288	4915	326	15	62
YouthT2D	AA	2136	0	2	2	17	17	0	0	0
YouthT2D	EU	2078	1	1	0	12	11	1	1	1

## Sheet: Table S3b
Trait	Ancestry	Gold-standard GWAS sample size	Largest GWAS	Largest GWAS sample size	Number of significant association signals produced by each analysis
					Gold-standard GWAS	Largest GWAS		Any GWAS				Uncorrected meta-analysis				Overlap-corrected meta-analysis				Largest GWAS but not overlap-corrected meta-analysis
					Gold-standard GWAS	Largest GWAS	Largest GWAS, replicated in gold-standard GWAS	Any GWAS	Any GWAS, replicated in gold-standard GWAS	Any GWAS but not the largest GWAS	Any GWAS but not the largest GWAS, replicated in gold-standard GWAS	Uncorrected meta-analysis	Uncorrected meta-analysis, replicated in gold-standard GWAS	Uncorrected meta-analysis but not the largest GWAS	Uncorrected meta-analysis but not the largest GWAS, replicated in the largest GWAS	Overlap-corrected meta-analysis	Overlap-corrected meta-analysis, replicated in gold-standard GWAS	Overlap-corrected meta-analysis but not the largest GWAS	Overlap-corrected meta-analysis but not the largest GWAS, replicated in gold-standard GWAS	Largest GWAS but not overlap-corrected meta-analysis	Largest GWAS but not overlap-corrected meta-analysis, replicated in gold-standard GWAS
2hrG	EU	133010	GWAS_MAGIC-2hrGlucose_eu	15234	7	1	1	1	1	0	0	2	2	1	1	2	2	1	1	0	0
AD	EU	487511	GWAS_UKBiobankAD_eu	455258	69	30	26	37	28	7	2	35	27	7	2	39	29	10	4	1	1
AF	EU	537409	GWAS_FinnGen_eu	96499	116	4	4	4	4	0	0	6	6	2	2	6	6	2	2	0	0
Alb	EU	459135	Prins2017_Biomarkers_EU	9961	496	1	1	2	1	1	0	3	2	2	1	3	2	2	1	0	0
ALLOA	EU	455221	Zengini2018_Osteoarthritis_SelfReported_EU	63556	38	1	1	1	1	0	0	30	8	29	7	4	4	3	3	0	0
ALP	EU	459135	Barton2021_Cardiometabolic_EU	458235	441	399	343	455	386	56	43	1010	404	613	61	387	352	39	27	51	18
ALS	EU	138086	Nicolas2018_ALS_EU	80610	15	7	7	8	7	1	0	125	11	118	4	7	7	0	0	0	0
ALT	EU	459135	Barton2021_Cardiometabolic_EU	458235	307	288	237	341	271	53	34	816	291	530	54	297	256	40	25	31	6
AST	EU	459135	Barton2021_Cardiometabolic_EU	458235	466	379	344	382	344	3	0	368	324	30	3	382	343	5	0	2	1
Asthma	EU	1376071	Olafsdottir2020_Asthma_eu	771388	136	79	69	119	79	40	10	4675	134	4596	65	126	86	47	17	0	0
BasoCount	EU	563946	Jurgens2022_Quantitative_EU	459135	261	115	105	225	200	110	95	589	242	474	137	210	175	97	70	2	0
BFP	EU	155961	GWAS_GS-SFHS-2789-3393_eu	20032	76	1	1	1	1	0	0	1	1	0	0	1	1	0	0	0	0
BMI	EA	191764	Akiyama2017_BMI_EA	158284	71	71	71	71	71	0	0	75	71	4	0	74	71	3	0	0	0
BMI	EU	795640	Jurgens2022_Quantitative_EU	459135	462	425	364	447	370	22	6	1588	455	1167	91	407	365	32	17	50	16
BS	EU	518615	Jurgens2022_Quantitative_EU	459135	110	155	101	156	101	1	0	623	110	468	9	153	99	8	0	10	2
CAD	EU	1347212	GWAS_CADMETA_eu	547261	208	159	145	162	145	3	0	653	199	494	54	137	128	3	1	25	18
CD	EU	86640	deLange2017_CD_EU	40266	51	88	48	97	48	9	0	124	49	37	1	110	49	23	1	1	0
CHOL	EA	288127	GWAS_BBJ_ea	191764	128	36	35	82	66	46	31	142	85	106	50	88	70	53	35	1	0
CHOL	EU	1320016	Jurgens2022_Quantitative_EU	459135	667	327	281	329	281	2	0	271	231	33	13	272	246	20	16	75	51
CHOL	SA	40963	Huang2021_Cardiometabolic_SA	17348	23	11	10	12	11	1	1	17	14	6	4	15	14	4	4	0	0
Cirrhosis	EU	406638	Sveinbjornsson2022_NAFLD_deCODE_EU	397105	4	1	1	6	2	5	1	8	2	7	1	6	2	5	1	0	0
CKD	EU	133413	GWAS_CKDGenConsortium_eu	110517	4	25	4	25	4	0	0	24	4	1	0	25	4	0	0	0	0
Creatinine	EU	459135	GWAS_GS-SFHS-2789-3393_eu	20032	901	1	1	4	2	3	1	49	6	48	5	9	8	8	7	0	0
CreatinineUrinary	EU	7119	GWAS_HOORN_2018_DCS	3414	1	1	1	2	1	1	0	1	1	0	0	1	1	0	0	0	0
CRP	EU	459135	Said2022_CRP_EU	427367	391	274	238	277	240	3	2	249	199	44	11	186	173	5	3	93	68
eGFRcrea	EU	133413	GWAS_CKDGenConsortium_eu	110517	47	248	46	258	46	10	0	308	46	71	0	244	46	17	0	21	0
EosinCount	EU	563946	Jurgens2022_Quantitative_EU	459135	574	553	494	619	528	66	34	1932	573	1379	79	602	527	67	34	18	1
Estradiol	EU	206927	Schmitz2021_Estradiol_EU_Females	163985	21	2	1	16	15	14	14	9	9	8	8	9	9	8	8	1	0
FEV1	EU	400102	GWAS_SpiroMeta_eu_UKBiobank	321047	336	254	240	255	241	1	1	337	335	97	95	274	273	44	44	24	11
FEV1toFVC	EU	400102	GWAS_SpiroMeta_eu_UKBiobank	321047	390	368	338	370	338	2	0	390	390	52	52	358	355	30	30	40	13
FGadjBMI	EA	35619	Spracklen2018_glycemic_EA	6943	17	2	2	2	2	0	0	3	3	1	1	3	3	1	1	0	0
FGadjBMI	EU	200622	GWAS_MAGIC-FGFI2012_eu	58074	87	22	22	24	24	2	2	31	30	9	8	29	28	7	6	0	0
FG	EA	288127	GWAS_DCSP2LB_ea	3515	79	1	1	1	1	0	0	1	1	0	0	1	1	0	0	0	0
FG	EU	151188	GWAS_MAGIC-Metabochip_eu	133010	49	33	30	34	31	1	1	199	45	167	15	28	27	3	2	8	5
FIadjBMI	EU	200622	GWAS_MAGIC-FGFI2012_eu	58074	45	10	9	10	9	0	0	18	15	8	6	15	13	5	4	0	0
FI	EU	151188	GWAS_MAGIC-Metabochip_eu	133010	14	14	11	15	12	1	1	178	13	164	2	9	8	2	1	7	4
FVC	EU	400102	GWAS_SpiroMeta_eu_UKBiobank	321047	303	233	218	233	218	0	0	300	299	82	81	243	242	36	36	26	12
GGT	EU	459135	Barton2021_Cardiometabolic_EU	458235	428	409	319	489	374	80	55	1030	401	621	82	447	368	82	53	44	4
HBA1C	EA	288127	GWAS_BBJ_ea	191764	93	27	26	32	29	5	3	40	37	13	11	39	36	12	10	0	0
HBA1C	EU	459135	SinnottArmstrong2021_HBA1C_EU	318779	504	257	251	468	369	211	118	545	369	293	120	442	350	191	102	6	3
HbConc	EU	563946	Jurgens2022_Quantitative_EU	459135	514	401	366	490	425	89	59	1698	509	1298	143	476	413	87	52	12	5
HCC	EU	406638	Sveinbjornsson2022_NAFLD_deCODE_EU	397105	4	0	0	0	0	0	0	2		2	0	0	0	0	0	0	0
HDL	EA	288127	GWAS_BBJ_ea	191764	133	32	31	65	56	33	25	97	72	65	41	72	64	41	33	1	0
HDL	EU	1320016	Jurgens2022_Quantitative_EU	459135	648	323	282	409	319	86	37	813	415	495	134	352	305	57	40	28	17
HDL	SA	40963	Huang2021_Cardiometabolic_SA	17348	25	14	12	16	14	2	2	20	17	6	5	19	16	5	4	0	0
HEIGHT	AA	293593	Graff2021_Height_AA_Male_Female	41389	214	41	30	42	31	1	1	56	38	15	8	42	31	2	2	1	1
HEIGHT	EA	472730	GWAS_CUHK_ea	6742	538	0	0	0	0	0	0	0		0	0	0	0	0	0	0	0
HEIGHT	EU	4080687	GWAS_GiantUKBB_eu	795640	577	234	228	328	243	94	15	1612	395	1379	168	239	220	28	9	23	17
HEIGHT	HS	455180	Fernandez-Rhodes2022_Anthropometric_HS	59771	77	42	34	43	34	1	0	56	40	15	7	54	40	14	8	2	2
HF	EU	1020441	GWAS_HERMES_eu	972032	15	12	8	12	8	0	0	40	9	28	1	9	6	0	0	3	2
HR	EU	458969	GWAS_GS-SFHS-2789-3393_eu	20032	460	6	1	8	1	2	0	6	2	1	1	6	1	0	0	0	0
HYPERTENSION	EU	458969	GWAS_FinnGen_eu	96499	341	13	13	15	14	2	1	36	33	23	20	30	28	17	15	0	0
IBD	EU	86640	deLange2017_IBD_EU	59957	79	138	62	138	62	0	0	143	63	8	1	144	63	8	1	2	0
IBS	EU	486601	Bonfiglio2018_IBS_EU	346075	7	1	0	1	0	0	0	0		0	0	1	0	0	0	0	0
IPF	EU	953873	Duckworth2020_IPF_EU	437235	15	10	2	37	9	27	7	10	2	0	0	33	9	26	7	3	0
LDL	EA	288127	GWAS_BBJ_ea	191764	101	22	20	53	44	31	24	68	54	47	34	60	52	40	32	2	0
LDL	EU	1320016	Jurgens2022_Quantitative_EU	459135	372	239	214	304	237	65	23	1707	321	1470	107	261	218	52	25	30	21
LDL	SA	40963	Huang2021_Cardiometabolic_SA	17348	16	7	6	9	8	2	2	10	9	3	3	10	9	3	3	0	0
LVEDV	EU	41135	GWAS_UKBiobankMRI_eu	36041	19	19	12	19	12	0	0	60	15	41	3	22	12	3	0	0	0
LVEF	EU	41135	GWAS_UKBiobankMRI_eu	36041	19	22	12	23	13	1	1	43	15	23	4	20	12	2	1	4	1
LVESV	EU	41135	GWAS_UKBiobankMRI_eu	36041	25	31	17	31	17	0	0	71	22	41	5	31	18	5	1	5	0
LymphoCount	EU	563946	Jurgens2022_Quantitative_EU	459135	523	441	392	525	457	84	65	1898	520	1458	128	517	447	89	56	13	1
MDD	EU	322580	Howard2018_DepressionICD_EU	217584	13	1	0	9	4	8	4	38	3	37	3	10	4	10	4	1	0
MeanCorpHb	EU	563946	Jurgens2022_Quantitative_EU	459135	489	473	415	557	458	84	43	1646	489	1174	74	557	455	91	40	7	0
MeanCorpHbConc	EU	563946	Jurgens2022_Quantitative_EU	459135	260	134	125	236	208	102	83	697	256	563	131	216	188	84	63	2	0
MeanCorpVol	EU	563946	Jurgens2022_Quantitative_EU	459135	540	476	418	570	473	94	55	1707	536	1234	118	561	463	95	46	10	1
MI	EU	639221	Kurki2023_FinnGen_EU	342499	94	48	29	48	29	0	0	50	29	2	0	50	29	2	0	0	0
MonoCount	EU	563946	Jurgens2022_Quantitative_EU	459135	543	441	403	519	462	78	59	1754	542	1313	139	515	455	82	54	8	2
NAFLD	EU	778614	Sveinbjornsson2022_NAFLD_UKBB_EU	406638	4	6	4	9	4	3	0	69	4	63	0	9	4	3	0	0	0
NeutCount	EU	563946	Jurgens2022_Quantitative_EU	459135	503	426	367	518	431	92	64	1780	501	1355	134	498	422	85	55	13	0
PEF	EU	400102	GWAS_SpiroMeta_eu_UKBiobank	321047	257	247	228	247	228	0	0	256	255	30	29	249	242	23	20	21	6
PlatCount	EU	563946	Jurgens2022_Quantitative_EU	459135	624	603	527	655	550	52	23	2120	619	1517	92	640	551	67	31	30	7
PlatVol	EU	563946	Jurgens2022_Quantitative_EU	459135	529	700	509	769	517	69	8	2105	528	1405	19	758	521	94	12	36	0
POAG	EA	269960	GWAS_BBJ_ea	191764	9	6	5	11	5	5	0	49	8	43	3	10	5	4	0	0	0
POAG	EU	1172905	Kurki2023_FinnGen_EU	342499	41	34	23	77	33	43	10	253	40	219	17	93	39	63	16	4	0
RBCDistWidth	EU	563946	Jurgens2022_Quantitative_EU	459135	459	411	363	480	400	69	37	2354	457	1943	94	466	394	63	32	8	1
RedCount	EU	563946	Jurgens2022_Quantitative_EU	459135	522	446	396	550	444	104	48	4959	521	4513	125	517	427	79	34	8	3
RhA	EU	291471	Ishigaki2022_RhA_EU	97173	8	69	4	71	4	2	0	107	4	38	0	72	4	5	0	2	0
SmokingFGmain	EU	18365	GWAS_SmokingT2Des_eu	10639	5	3	3	3	3	0	0	5	5	2	2	5	5	2	2	0	0
SmokingT2Dmain	EU	18365	GWAS_SmokingT2Des_eu	10639	5	7	2	10	4	3	2	8	5	4	3	7	4	4	3	4	1
Stroke_hemorrhagic	EU	96499	GWAS_Stroke_europe	967	1	0	0	0	0	0	0	340		340	0	0	0	0	0	0	0
Stroke_ischemic	EU	1308460	Surakka2022_IschemicStroke_EU	1039382	26	8	2	18	9	10	7	69	24	63	22	21	15	17	13	4	0
T1D	EU	520580	Kurki2023_FinnGen_EU	342499	87	16	16	120	56	104	40	213	71	197	55	117	60	101	44	0	0
T2DadjBMI	EU	898130	GWAS_DIAGRAMimputed_eu	159208	182	27	26	60	58	33	32	80	73	53	47	58	57	31	31	0	0
T2D	EU	933970	Kurki2023_FinnGen_EU	342499	186	140	98	184	123	44	25	1965	184	1829	86	183	130	69	36	26	4
T2D	SA	50533	Mahajan2022_T2D_SA	49492	25	11	10	12	10	1	0	27	10	16	0	25	10	14	0	0	0
TG	EA	288127	GWAS_BBJ_ea	191764	111	26	26	37	33	11	7	65	51	40	26	53	44	28	19	1	1
TG	EU	1320016	Jurgens2022_Quantitative_EU	459135	584	318	285	327	288	9	3	678	361	373	82	272	249	21	11	67	47
TG	SA	40963	Huang2021_Cardiometabolic_SA	17348	26	10	10	12	11	2	1	16	12	6	2	12	11	2	1	0	0
UACR	EU	547361	GWAS_Exeter-Casanova2019UACR_eu	437027	61	54	45	69	48	15	3	2966	61	2912	16	52	43	9	3	11	5
Urate	EU	459135	GWAS_CDKGen-Tin2019Urate_eu	288666	626	95	87	159	89	64	2	285	164	190	77	159	88	66	3	2	2
VitD	EU	496946	Jurgens2022_Quantitative_EU	459135	129	140	85	140	85	0	0	139	85	0	0	139	85	0	0	1	0
WAIST	EU	232101	GWAS_GODARTS_METABO	7119	45	1	0	3	1	2	1	16	3	16	3	1	1	1	1	1	0
WBC	EU	563946	Jurgens2022_Quantitative_EU	459135	624	502	451	605	525	103	74	1883	618	1382	167	590	519	107	72	19	4
WEIGHT	EU	459135	GWAS_GODARTS_METABO	7119	1134	1	0	5	2	4	2	5	3	5	3	1	1	1	1	1	0
WHRadjBMI	EU	694649	GWAS_GIANT-A_eu	232101	605	42	42	52	52	10	10	70	67	28	25	58	57	16	15	0	0
WHR	EU	694649	GWAS_GIANT-A_eu	232101	594	33	33	33	33	0	0	31	31	5	5	31	31	2	2	4	4

## Sheet: Table S4a
Trait, ancestry, chromosome, shared association region ID	Number of independent signals produced by the largest GWAS	Number of independent signals produced by the overlap-corrected GWAS
2hrG.EU.chr15.locus1	0	1
2hrG.EU.chr19.locus1	1	1
2hrG.EU.chr2.locus1	1	1
2hrG.EU.chr3.locus1	1	1
2hrG.EU.chr5.locus1	1	0
2hrG.EU.chr7.locus1	1	1
2hrG.EU.chr8.locus1	1	1
AD.EU.chr11.locus1	1	2
AD.EU.chr11.locus2	0	1
AD.EU.chr11.locus3	2	2
AD.EU.chr11.locus4	2	1
AD.EU.chr14.locus1	1	0
AD.EU.chr14.locus2	1	1
AD.EU.chr14.locus3	1	1
AD.EU.chr14.locus4	0	1
AD.EU.chr15.locus1	1	1
AD.EU.chr15.locus2	1	1
AD.EU.chr16.locus1	2	0
AD.EU.chr16.locus2	1	0
AD.EU.chr17.locus1	1	1
AD.EU.chr17.locus2	0	1
AD.EU.chr17.locus3	0	1
AD.EU.chr17.locus4	1	0
AD.EU.chr18.locus1	0	1
AD.EU.chr19.locus1	2	4
AD.EU.chr19.locus2	8	8
AD.EU.chr1.locus1	1	1
AD.EU.chr20.locus1	1	1
AD.EU.chr2.locus1	3	4
AD.EU.chr2.locus2	0	1
AD.EU.chr2.locus3	1	1
AD.EU.chr3.locus1	1	0
AD.EU.chr4.locus1	1	1
AD.EU.chr5.locus1	1	1
AD.EU.chr5.locus2	1	1
AD.EU.chr6.locus1	1	1
AD.EU.chr6.locus2	0	1
AD.EU.chr7.locus1	1	0
AD.EU.chr7.locus2	1	1
AD.EU.chr7.locus3	1	2
AD.EU.chr7.locus4	1	1
AD.EU.chr8.locus1	1	0
AD.EU.chr8.locus2	2	1
AD.EU.chr8.locus3	2	2
AD.EU.chr9.locus1	1	0
ADHD.EU.chr15.locus1	0	1
ADHD.EU.chr4.locus1	0	1
ADHD.EU.chr5.locus1	1	0
AF.EU.chr10.locus1	1	0
AF.EU.chr10.locus2	1	1
AF.EU.chr10.locus3	1	1
AF.EU.chr10.locus4	1	1
AF.EU.chr10.locus5	4	4
AF.EU.chr11.locus1	1	1
AF.EU.chr11.locus2	1	1
AF.EU.chr12.locus1	2	2
AF.EU.chr12.locus2	1	1
AF.EU.chr12.locus3	3	3
AF.EU.chr12.locus4	1	1
AF.EU.chr14.locus1	1	1
AF.EU.chr14.locus2	1	1
AF.EU.chr14.locus3	1	1
AF.EU.chr14.locus4	1	1
AF.EU.chr15.locus1	1	1
AF.EU.chr15.locus2	1	1
AF.EU.chr15.locus3	1	1
AF.EU.chr15.locus4	1	1
AF.EU.chr16.locus1	2	2
AF.EU.chr16.locus2	1	1
AF.EU.chr17.locus1	0	1
AF.EU.chr17.locus2	1	1
AF.EU.chr1.locus1	1	1
AF.EU.chr1.locus2	0	1
AF.EU.chr1.locus3	1	1
AF.EU.chr1.locus4	2	3
AF.EU.chr1.locus5	5	5
AF.EU.chr20.locus1	1	1
AF.EU.chr20.locus2	0	1
AF.EU.chr21.locus1	1	1
AF.EU.chr2.locus1	1	1
AF.EU.chr2.locus2	1	1
AF.EU.chr2.locus3	1	1
AF.EU.chr2.locus4	1	1
AF.EU.chr2.locus5	1	1
AF.EU.chr3.locus1	2	2
AF.EU.chr3.locus2	1	1
AF.EU.chr3.locus3	1	1
AF.EU.chr4.locus1	6	5
AF.EU.chr4.locus2	1	1
AF.EU.chr4.locus3	2	3
AF.EU.chr5.locus1	0	1
AF.EU.chr5.locus2	1	1
AF.EU.chr5.locus3	1	1
AF.EU.chr5.locus4	1	1
AF.EU.chr6.locus1	1	1
AF.EU.chr6.locus2	1	1
AF.EU.chr6.locus3	1	1
AF.EU.chr6.locus4	1	1
AF.EU.chr6.locus5	1	2
AF.EU.chr6.locus6	1	1
AF.EU.chr7.locus1	0	1
AF.EU.chr7.locus2	1	1
AF.EU.chr7.locus3	1	1
AF.EU.chr7.locus4	2	2
AF.EU.chr7.locus5	1	1
AF.EU.chr7.locus6	1	1
AF.EU.chr8.locus1	2	1
AF.EU.chr8.locus2	1	1
AF.EU.chr8.locus3	1	1
AF.EU.chr8.locus4	1	0
AF.EU.chr9.locus1	1	1
AFR.EU.chr10.locus1	1	1
AFR.EU.chr16.locus1	1	1
AFR.EU.chr18.locus1	1	1
AFR.EU.chr1.locus1	1	1
AFR.EU.chr20.locus1	1	1
AFR.EU.chr2.locus1	2	2
AFR.EU.chr2.locus2	1	1
AFR.EU.chr3.locus1	1	1
AFR.EU.chr5.locus1	1	1
AFR.EU.chr6.locus1	1	1
Alb.EU.chr10.locus1	3	3
Alb.EU.chr10.locus2	1	1
Alb.EU.chr10.locus3	1	0
Alb.EU.chr10.locus4	1	0
Alb.EU.chr11.locus1	1	1
Alb.EU.chr11.locus10	3	0
Alb.EU.chr11.locus11	2	1
Alb.EU.chr11.locus12	1	1
Alb.EU.chr11.locus13	1	1
Alb.EU.chr11.locus14	1	0
Alb.EU.chr11.locus15	1	1
Alb.EU.chr11.locus16	3	1
Alb.EU.chr11.locus17	2	2
Alb.EU.chr11.locus2	1	1
Alb.EU.chr11.locus3	3	2
Alb.EU.chr11.locus4	0	2
Alb.EU.chr11.locus5	2	0
Alb.EU.chr11.locus6	1	1
Alb.EU.chr11.locus7	1	0
Alb.EU.chr11.locus8	1	1
Alb.EU.chr11.locus9	1	1
Alb.EU.chr12.locus1	1	1
Alb.EU.chr12.locus2	1	1
Alb.EU.chr12.locus3	1	1
Alb.EU.chr12.locus4	1	1
Alb.EU.chr12.locus5	3	3
Alb.EU.chr12.locus6	2	1
Alb.EU.chr12.locus7	1	1
Alb.EU.chr13.locus1	1	1
Alb.EU.chr14.locus1	1	0
Alb.EU.chr14.locus2	2	2
Alb.EU.chr14.locus3	2	2
Alb.EU.chr14.locus4	7	8
Alb.EU.chr14.locus5	3	4
Alb.EU.chr15.locus1	1	0
Alb.EU.chr15.locus10	3	3
Alb.EU.chr15.locus2	2	0
Alb.EU.chr15.locus3	2	1
Alb.EU.chr15.locus4	3	3
Alb.EU.chr15.locus5	1	1
Alb.EU.chr15.locus6	1	0
Alb.EU.chr15.locus7	2	1
Alb.EU.chr15.locus8	1	1
Alb.EU.chr15.locus9	2	0
Alb.EU.chr16.locus1	1	1
Alb.EU.chr16.locus2	1	0
Alb.EU.chr16.locus3	2	2
Alb.EU.chr16.locus4	1	1
Alb.EU.chr16.locus5	1	1
Alb.EU.chr17.locus1	7	5
Alb.EU.chr17.locus10	1	1
Alb.EU.chr17.locus11	5	5
Alb.EU.chr17.locus2	1	1
Alb.EU.chr17.locus3	4	3
Alb.EU.chr17.locus4	1	1
Alb.EU.chr17.locus5	1	1
Alb.EU.chr17.locus6	1	1
Alb.EU.chr17.locus7	2	2
Alb.EU.chr17.locus8	2	2
Alb.EU.chr17.locus9	2	2
Alb.EU.chr18.locus1	1	0
Alb.EU.chr18.locus2	1	1
Alb.EU.chr18.locus3	1	1
Alb.EU.chr18.locus4	1	1
Alb.EU.chr19.locus1	1	0
Alb.EU.chr19.locus10	1	0
Alb.EU.chr19.locus11	4	3
Alb.EU.chr19.locus12	1	0
Alb.EU.chr19.locus2	1	1
Alb.EU.chr19.locus3	1	0
Alb.EU.chr19.locus4	1	1
Alb.EU.chr19.locus5	4	3
Alb.EU.chr19.locus6	1	1
Alb.EU.chr19.locus7	3	3
Alb.EU.chr19.locus8	9	7
Alb.EU.chr19.locus9	1	1
Alb.EU.chr1.locus1	1	1
Alb.EU.chr1.locus10	1	0
Alb.EU.chr1.locus11	2	5
Alb.EU.chr1.locus12	1	0
Alb.EU.chr1.locus13	2	2
Alb.EU.chr1.locus14	1	0
Alb.EU.chr1.locus15	1	1
Alb.EU.chr1.locus16	1	1
Alb.EU.chr1.locus17	3	2
Alb.EU.chr1.locus18	2	1
Alb.EU.chr1.locus19	1	0
Alb.EU.chr1.locus2	1	0
Alb.EU.chr1.locus3	1	0
Alb.EU.chr1.locus4	1	1
Alb.EU.chr1.locus5	1	1
Alb.EU.chr1.locus6	1	1
Alb.EU.chr1.locus7	2	2
Alb.EU.chr1.locus8	3	2
Alb.EU.chr1.locus9	1	1
Alb.EU.chr20.locus1	1	0
Alb.EU.chr20.locus2	1	0
Alb.EU.chr20.locus3	2	1
Alb.EU.chr20.locus4	2	1
Alb.EU.chr20.locus5	1	0
Alb.EU.chr20.locus6	1	1
Alb.EU.chr20.locus7	2	1
Alb.EU.chr21.locus1	1	0
Alb.EU.chr22.locus1	1	1
Alb.EU.chr22.locus2	1	1
Alb.EU.chr22.locus3	2	2
Alb.EU.chr22.locus4	1	0
Alb.EU.chr22.locus5	1	1
Alb.EU.chr2.locus1	11	8
Alb.EU.chr2.locus10	1	1
Alb.EU.chr2.locus11	1	0
Alb.EU.chr2.locus12	1	1
Alb.EU.chr2.locus13	2	2
Alb.EU.chr2.locus2	0	2
Alb.EU.chr2.locus3	1	1
Alb.EU.chr2.locus4	1	0
Alb.EU.chr2.locus5	1	1
Alb.EU.chr2.locus6	1	1
Alb.EU.chr2.locus7	1	1
Alb.EU.chr2.locus8	1	1
Alb.EU.chr2.locus9	1	1
Alb.EU.chr3.locus1	2	2
Alb.EU.chr3.locus10	2	2
Alb.EU.chr3.locus11	1	0
Alb.EU.chr3.locus12	1	1
Alb.EU.chr3.locus13	1	1
Alb.EU.chr3.locus2	1	0
Alb.EU.chr3.locus3	1	1
Alb.EU.chr3.locus4	1	1
Alb.EU.chr3.locus5	1	1
Alb.EU.chr3.locus6	1	1
Alb.EU.chr3.locus7	1	0
Alb.EU.chr3.locus8	1	0
Alb.EU.chr3.locus9	1	1
Alb.EU.chr4.locus1	5	7
Alb.EU.chr4.locus10	1	1
Alb.EU.chr4.locus11	1	0
Alb.EU.chr4.locus12	1	1
Alb.EU.chr4.locus13	1	1
Alb.EU.chr4.locus14	1	0
Alb.EU.chr4.locus15	1	1
Alb.EU.chr4.locus16	4	3
Alb.EU.chr4.locus2	1	0
Alb.EU.chr4.locus3	4	4
Alb.EU.chr4.locus4	1	0
Alb.EU.chr4.locus5	1	0
Alb.EU.chr4.locus6	1	0
Alb.EU.chr4.locus7	4	4
Alb.EU.chr4.locus8	1	1
Alb.EU.chr4.locus9	1	2
Alb.EU.chr5.locus1	1	0
Alb.EU.chr5.locus10	1	1
Alb.EU.chr5.locus11	1	0
Alb.EU.chr5.locus12	1	0
Alb.EU.chr5.locus13	1	0
Alb.EU.chr5.locus14	1	0
Alb.EU.chr5.locus15	1	0
Alb.EU.chr5.locus2	1	0
Alb.EU.chr5.locus3	4	2
Alb.EU.chr5.locus4	3	3
Alb.EU.chr5.locus5	2	2
Alb.EU.chr5.locus6	1	1
Alb.EU.chr5.locus7	1	0
Alb.EU.chr5.locus8	1	0
Alb.EU.chr5.locus9	2	1
Alb.EU.chr6.locus1	1	0
Alb.EU.chr6.locus10	1	1
Alb.EU.chr6.locus11	4	4
Alb.EU.chr6.locus2	1	0
Alb.EU.chr6.locus3	1	2
Alb.EU.chr6.locus4	1	0
Alb.EU.chr6.locus5	1	0
Alb.EU.chr6.locus6	1	1
Alb.EU.chr6.locus7	1	1
Alb.EU.chr6.locus8	1	0
Alb.EU.chr6.locus9	1	1
Alb.EU.chr7.locus1	2	1
Alb.EU.chr7.locus10	3	3
Alb.EU.chr7.locus2	1	0
Alb.EU.chr7.locus3	1	1
Alb.EU.chr7.locus4	1	0
Alb.EU.chr7.locus5	1	1
Alb.EU.chr7.locus6	1	1
Alb.EU.chr7.locus7	1	1
Alb.EU.chr7.locus8	1	1
Alb.EU.chr7.locus9	1	1
Alb.EU.chr8.locus1	3	4
Alb.EU.chr8.locus2	1	1
Alb.EU.chr8.locus3	1	1
Alb.EU.chr8.locus4	1	0
Alb.EU.chr8.locus5	1	0
Alb.EU.chr8.locus6	1	1
Alb.EU.chr8.locus7	1	0
Alb.EU.chr9.locus1	1	0
Alb.EU.chr9.locus2	1	0
Alb.EU.chr9.locus3	1	1
Alb.EU.chr9.locus4	1	1
Alb.EU.chr9.locus5	1	1
Alb.EU.chr9.locus6	1	1
allDKD.EU.chr10.locus1	1	1
AllergicRhinitis.EU.chr2.locus1	1	1
Allergy.EU.chr10.locus1	1	2
Allergy.EU.chr10.locus2	2	3
Allergy.EU.chr11.locus1	3	3
Allergy.EU.chr11.locus2	1	1
Allergy.EU.chr11.locus3	1	1
Allergy.EU.chr12.locus1	1	1
Allergy.EU.chr12.locus2	1	0
Allergy.EU.chr12.locus3	1	1
Allergy.EU.chr13.locus1	1	1
Allergy.EU.chr14.locus1	1	1
Allergy.EU.chr14.locus2	0	1
Allergy.EU.chr15.locus1	1	1
Allergy.EU.chr15.locus2	1	1
Allergy.EU.chr16.locus1	1	1
Allergy.EU.chr17.locus1	2	3
Allergy.EU.chr18.locus1	0	1
Allergy.EU.chr19.locus1	1	1
Allergy.EU.chr1.locus1	1	0
Allergy.EU.chr1.locus2	3	3
Allergy.EU.chr20.locus1	1	1
Allergy.EU.chr20.locus2	1	1
Allergy.EU.chr20.locus3	1	1
Allergy.EU.chr22.locus1	1	1
Allergy.EU.chr2.locus1	1	2
Allergy.EU.chr2.locus2	1	1
Allergy.EU.chr3.locus1	2	2
Allergy.EU.chr3.locus2	1	1
Allergy.EU.chr4.locus1	1	1
Allergy.EU.chr4.locus2	2	2
Allergy.EU.chr5.locus1	1	1
Allergy.EU.chr5.locus2	1	1
Allergy.EU.chr5.locus3	4	5
Allergy.EU.chr5.locus4	1	1
Allergy.EU.chr5.locus5	1	1
Allergy.EU.chr6.locus1	1	1
Allergy.EU.chr6.locus2	1	1
Allergy.EU.chr7.locus1	1	1
Allergy.EU.chr7.locus2	1	1
Allergy.EU.chr7.locus3	1	1
Allergy.EU.chr9.locus1	3	3
Allergy.EU.chr9.locus2	1	1
ALLOA.EU.chr12.locus1	1	0
ALLOA.EU.chr17.locus1	1	1
ALLOA.EU.chr19.locus1	1	1
ALLOA.EU.chr1.locus1	1	1
ALLOA.EU.chr1.locus2	1	0
ALLOA.EU.chr20.locus1	1	1
ALLOA.EU.chr2.locus1	1	0
ALLOA.EU.chr2.locus2	1	1
ALLOA.EU.chr4.locus1	1	1
ALLOA.EU.chr4.locus2	1	1
ALLOA.EU.chr4.locus3	1	1
ALLOA.EU.chr4.locus4	0	1
ALLOA.EU.chr6.locus1	1	0
ALLOA.EU.chr8.locus1	0	1
ALP.EU.chr10.locus1	1	2
ALP.EU.chr10.locus10	1	1
ALP.EU.chr10.locus11	2	3
ALP.EU.chr10.locus12	1	1
ALP.EU.chr10.locus13	2	3
ALP.EU.chr10.locus14	2	2
ALP.EU.chr10.locus15	6	5
ALP.EU.chr10.locus16	4	6
ALP.EU.chr10.locus17	1	3
ALP.EU.chr10.locus18	5	6
ALP.EU.chr10.locus19	1	1
ALP.EU.chr10.locus2	0	1
ALP.EU.chr10.locus3	1	0
ALP.EU.chr10.locus4	2	3
ALP.EU.chr10.locus5	1	1
ALP.EU.chr10.locus6	1	2
ALP.EU.chr10.locus7	1	0
ALP.EU.chr10.locus8	12	15
ALP.EU.chr10.locus9	0	1
ALP.EU.chr11.locus1	13	11
ALP.EU.chr11.locus10	1	2
ALP.EU.chr11.locus11	1	2
ALP.EU.chr11.locus12	1	1
ALP.EU.chr11.locus13	1	1
ALP.EU.chr11.locus14	14	13
ALP.EU.chr11.locus15	1	1
ALP.EU.chr11.locus16	2	3
ALP.EU.chr11.locus2	6	4
ALP.EU.chr11.locus3	2	4
ALP.EU.chr11.locus4	2	3
ALP.EU.chr11.locus5	1	2
ALP.EU.chr11.locus6	1	0
ALP.EU.chr11.locus7	4	6
ALP.EU.chr11.locus8	1	2
ALP.EU.chr11.locus9	1	2
ALP.EU.chr12.locus1	8	5
ALP.EU.chr12.locus10	0	1
ALP.EU.chr12.locus11	1	1
ALP.EU.chr12.locus12	2	1
ALP.EU.chr12.locus13	1	1
ALP.EU.chr12.locus14	1	1
ALP.EU.chr12.locus15	2	5
ALP.EU.chr12.locus16	0	2
ALP.EU.chr12.locus17	15	10
ALP.EU.chr12.locus18	1	1
ALP.EU.chr12.locus19	2	1
ALP.EU.chr12.locus2	1	0
ALP.EU.chr12.locus20	1	2
ALP.EU.chr12.locus3	1	3
ALP.EU.chr12.locus4	1	1
ALP.EU.chr12.locus5	0	1
ALP.EU.chr12.locus6	1	1
ALP.EU.chr12.locus7	1	1
ALP.EU.chr12.locus8	3	3
ALP.EU.chr12.locus9	1	3
ALP.EU.chr13.locus1	1	2
ALP.EU.chr13.locus2	6	15
ALP.EU.chr13.locus3	1	2
ALP.EU.chr13.locus4	4	3
ALP.EU.chr13.locus5	3	3
ALP.EU.chr13.locus6	1	0
ALP.EU.chr14.locus1	3	5
ALP.EU.chr14.locus10	1	3
ALP.EU.chr14.locus11	1	1
ALP.EU.chr14.locus12	1	1
ALP.EU.chr14.locus2	1	1
ALP.EU.chr14.locus3	1	1
ALP.EU.chr14.locus4	1	0
ALP.EU.chr14.locus5	3	4
ALP.EU.chr14.locus6	2	2
ALP.EU.chr14.locus7	1	0
ALP.EU.chr14.locus8	1	1
ALP.EU.chr14.locus9	1	3
ALP.EU.chr15.locus1	1	2
ALP.EU.chr15.locus2	0	1
ALP.EU.chr15.locus3	0	1
ALP.EU.chr15.locus4	2	1
ALP.EU.chr15.locus5	7	9
ALP.EU.chr15.locus6	0	1
ALP.EU.chr15.locus7	1	1
ALP.EU.chr15.locus8	1	1
ALP.EU.chr15.locus9	1	1
ALP.EU.chr16.locus1	1	1
ALP.EU.chr16.locus10	2	1
ALP.EU.chr16.locus11	1	2
ALP.EU.chr16.locus12	2	3
ALP.EU.chr16.locus13	2	1
ALP.EU.chr16.locus14	6	8
ALP.EU.chr16.locus15	0	5
ALP.EU.chr16.locus16	3	7
ALP.EU.chr16.locus17	2	2
ALP.EU.chr16.locus18	4	3
ALP.EU.chr16.locus19	1	0
ALP.EU.chr16.locus2	3	4
ALP.EU.chr16.locus3	2	2
ALP.EU.chr16.locus4	0	1
ALP.EU.chr16.locus5	1	2
ALP.EU.chr16.locus6	1	1
ALP.EU.chr16.locus7	1	1
ALP.EU.chr16.locus8	1	1
ALP.EU.chr16.locus9	1	1
ALP.EU.chr17.locus1	5	6
ALP.EU.chr17.locus10	2	3
ALP.EU.chr17.locus11	1	1
ALP.EU.chr17.locus12	1	1
ALP.EU.chr17.locus13	0	1
ALP.EU.chr17.locus14	1	0
ALP.EU.chr17.locus15	1	0
ALP.EU.chr17.locus16	4	5
ALP.EU.chr17.locus17	1	1
ALP.EU.chr17.locus2	1	1
ALP.EU.chr17.locus3	4	6
ALP.EU.chr17.locus4	0	1
ALP.EU.chr17.locus5	1	1
ALP.EU.chr17.locus6	1	2
ALP.EU.chr17.locus7	0	1
ALP.EU.chr17.locus8	3	5
ALP.EU.chr17.locus9	2	3
ALP.EU.chr18.locus1	1	1
ALP.EU.chr18.locus2	1	1
ALP.EU.chr18.locus3	1	0
ALP.EU.chr18.locus4	1	1
ALP.EU.chr18.locus5	3	5
ALP.EU.chr18.locus6	3	2
ALP.EU.chr18.locus7	5	4
ALP.EU.chr18.locus8	1	1
ALP.EU.chr19.locus1	1	2
ALP.EU.chr19.locus10	7	3
ALP.EU.chr19.locus11	1	1
ALP.EU.chr19.locus12	12	12
ALP.EU.chr19.locus13	2	2
ALP.EU.chr19.locus14	26	16
ALP.EU.chr19.locus15	1	0
ALP.EU.chr19.locus16	8	7
ALP.EU.chr19.locus17	1	0
ALP.EU.chr19.locus2	1	1
ALP.EU.chr19.locus3	1	2
ALP.EU.chr19.locus4	1	0
ALP.EU.chr19.locus5	2	3
ALP.EU.chr19.locus6	2	4
ALP.EU.chr19.locus7	3	9
ALP.EU.chr19.locus8	3	7
ALP.EU.chr19.locus9	1	2
ALP.EU.chr1.locus1	1	3
ALP.EU.chr1.locus10	1	1
ALP.EU.chr1.locus11	1	1
ALP.EU.chr1.locus12	0	1
ALP.EU.chr1.locus13	1	2
ALP.EU.chr1.locus14	2	1
ALP.EU.chr1.locus15	1	1
ALP.EU.chr1.locus16	1	1
ALP.EU.chr1.locus17	1	3
ALP.EU.chr1.locus18	1	1
ALP.EU.chr1.locus19	0	1
ALP.EU.chr1.locus2	1	1
ALP.EU.chr1.locus20	4	6
ALP.EU.chr1.locus21	2	5
ALP.EU.chr1.locus22	1	2
ALP.EU.chr1.locus23	1	1
ALP.EU.chr1.locus24	1	0
ALP.EU.chr1.locus25	1	1
ALP.EU.chr1.locus26	1	2
ALP.EU.chr1.locus27	1	2
ALP.EU.chr1.locus28	2	3
ALP.EU.chr1.locus29	1	0
ALP.EU.chr1.locus3	6	5
ALP.EU.chr1.locus30	2	3
ALP.EU.chr1.locus31	1	1
ALP.EU.chr1.locus32	1	3
ALP.EU.chr1.locus4	18	37
ALP.EU.chr1.locus5	1	2
ALP.EU.chr1.locus6	1	2
ALP.EU.chr1.locus7	2	5
ALP.EU.chr1.locus8	1	2
ALP.EU.chr1.locus9	4	5
ALP.EU.chr20.locus1	1	2
ALP.EU.chr20.locus10	1	1
ALP.EU.chr20.locus11	1	0
ALP.EU.chr20.locus12	1	2
ALP.EU.chr20.locus13	1	1
ALP.EU.chr20.locus14	1	2
ALP.EU.chr20.locus15	0	1
ALP.EU.chr20.locus16	1	2
ALP.EU.chr20.locus17	1	1
ALP.EU.chr20.locus2	1	0
ALP.EU.chr20.locus3	1	0
ALP.EU.chr20.locus4	1	1
ALP.EU.chr20.locus5	4	7
ALP.EU.chr20.locus6	1	1
ALP.EU.chr20.locus7	3	5
ALP.EU.chr20.locus8	1	2
ALP.EU.chr20.locus9	4	7
ALP.EU.chr21.locus1	2	0
ALP.EU.chr21.locus2	0	1
ALP.EU.chr21.locus3	1	1
ALP.EU.chr21.locus4	1	1
ALP.EU.chr22.locus1	2	2
ALP.EU.chr22.locus10	1	1
ALP.EU.chr22.locus11	1	2
ALP.EU.chr22.locus2	1	1
ALP.EU.chr22.locus3	0	1
ALP.EU.chr22.locus4	1	2
ALP.EU.chr22.locus5	1	3
ALP.EU.chr22.locus6	1	1
ALP.EU.chr22.locus7	3	4
ALP.EU.chr22.locus8	2	3
ALP.EU.chr22.locus9	1	1
ALP.EU.chr2.locus1	1	1
ALP.EU.chr2.locus10	1	1
ALP.EU.chr2.locus11	1	1
ALP.EU.chr2.locus12	2	2
ALP.EU.chr2.locus13	0	2
ALP.EU.chr2.locus14	1	1
ALP.EU.chr2.locus15	1	1
ALP.EU.chr2.locus16	3	3
ALP.EU.chr2.locus17	3	3
ALP.EU.chr2.locus18	1	1
ALP.EU.chr2.locus19	1	1
ALP.EU.chr2.locus2	2	3
ALP.EU.chr2.locus20	1	1
ALP.EU.chr2.locus21	6	5
ALP.EU.chr2.locus22	2	3
ALP.EU.chr2.locus23	1	2
ALP.EU.chr2.locus24	1	0
ALP.EU.chr2.locus25	3	3
ALP.EU.chr2.locus26	2	2
ALP.EU.chr2.locus27	1	1
ALP.EU.chr2.locus28	2	2
ALP.EU.chr2.locus29	1	1
ALP.EU.chr2.locus3	1	1
ALP.EU.chr2.locus30	2	2
ALP.EU.chr2.locus4	8	10
ALP.EU.chr2.locus5	0	2
ALP.EU.chr2.locus6	1	1
ALP.EU.chr2.locus7	1	2
ALP.EU.chr2.locus8	2	1
ALP.EU.chr2.locus9	1	1
ALP.EU.chr3.locus1	2	2
ALP.EU.chr3.locus10	1	1
ALP.EU.chr3.locus11	1	1
ALP.EU.chr3.locus12	1	2
ALP.EU.chr3.locus13	0	1
ALP.EU.chr3.locus14	2	2
ALP.EU.chr3.locus15	2	3
ALP.EU.chr3.locus16	0	1
ALP.EU.chr3.locus17	2	1
ALP.EU.chr3.locus18	1	1
ALP.EU.chr3.locus19	1	1
ALP.EU.chr3.locus2	2	3
ALP.EU.chr3.locus3	1	1
ALP.EU.chr3.locus4	1	1
ALP.EU.chr3.locus5	1	2
ALP.EU.chr3.locus6	1	1
ALP.EU.chr3.locus7	2	4
ALP.EU.chr3.locus8	2	3
ALP.EU.chr3.locus9	1	1
ALP.EU.chr4.locus1	2	3
ALP.EU.chr4.locus10	1	2
ALP.EU.chr4.locus11	1	1
ALP.EU.chr4.locus12	5	9
ALP.EU.chr4.locus13	1	2
ALP.EU.chr4.locus14	1	1
ALP.EU.chr4.locus15	1	1
ALP.EU.chr4.locus16	2	1
ALP.EU.chr4.locus17	1	2
ALP.EU.chr4.locus18	1	2
ALP.EU.chr4.locus2	1	0
ALP.EU.chr4.locus3	1	1
ALP.EU.chr4.locus4	1	1
ALP.EU.chr4.locus5	2	2
ALP.EU.chr4.locus6	7	4
ALP.EU.chr4.locus7	1	0
ALP.EU.chr4.locus8	2	1
ALP.EU.chr4.locus9	1	1
ALP.EU.chr5.locus1	1	0
ALP.EU.chr5.locus10	1	1
ALP.EU.chr5.locus11	1	1
ALP.EU.chr5.locus12	1	1
ALP.EU.chr5.locus13	1	1
ALP.EU.chr5.locus14	1	1
ALP.EU.chr5.locus15	1	0
ALP.EU.chr5.locus2	1	2
ALP.EU.chr5.locus3	2	1
ALP.EU.chr5.locus4	1	1
ALP.EU.chr5.locus5	1	2
ALP.EU.chr5.locus6	0	1
ALP.EU.chr5.locus7	2	2
ALP.EU.chr5.locus8	2	3
ALP.EU.chr5.locus9	1	1
ALP.EU.chr6.locus1	1	1
ALP.EU.chr6.locus10	2	3
ALP.EU.chr6.locus11	1	1
ALP.EU.chr6.locus12	1	1
ALP.EU.chr6.locus13	1	1
ALP.EU.chr6.locus14	1	1
ALP.EU.chr6.locus15	1	1
ALP.EU.chr6.locus16	1	1
ALP.EU.chr6.locus17	0	2
ALP.EU.chr6.locus18	1	3
ALP.EU.chr6.locus19	1	1
ALP.EU.chr6.locus2	1	1
ALP.EU.chr6.locus20	3	3
ALP.EU.chr6.locus21	1	1
ALP.EU.chr6.locus3	3	4
ALP.EU.chr6.locus4	29	16
ALP.EU.chr6.locus5	2	3
ALP.EU.chr6.locus6	1	2
ALP.EU.chr6.locus7	1	1
ALP.EU.chr6.locus8	4	4
ALP.EU.chr6.locus9	1	2
ALP.EU.chr7.locus1	1	2
ALP.EU.chr7.locus10	1	1
ALP.EU.chr7.locus11	1	2
ALP.EU.chr7.locus12	1	1
ALP.EU.chr7.locus13	2	2
ALP.EU.chr7.locus14	3	4
ALP.EU.chr7.locus15	0	1
ALP.EU.chr7.locus16	3	3
ALP.EU.chr7.locus2	1	1
ALP.EU.chr7.locus3	0	1
ALP.EU.chr7.locus4	2	1
ALP.EU.chr7.locus5	1	1
ALP.EU.chr7.locus6	1	1
ALP.EU.chr7.locus7	2	2
ALP.EU.chr7.locus8	0	1
ALP.EU.chr7.locus9	3	5
ALP.EU.chr8.locus1	5	4
ALP.EU.chr8.locus10	2	3
ALP.EU.chr8.locus11	1	1
ALP.EU.chr8.locus12	1	1
ALP.EU.chr8.locus13	7	8
ALP.EU.chr8.locus14	16	12
ALP.EU.chr8.locus15	1	1
ALP.EU.chr8.locus16	3	3
ALP.EU.chr8.locus2	6	3
ALP.EU.chr8.locus3	6	3
ALP.EU.chr8.locus4	7	4
ALP.EU.chr8.locus5	1	1
ALP.EU.chr8.locus6	1	1
ALP.EU.chr8.locus7	1	0
ALP.EU.chr8.locus8	1	2
ALP.EU.chr8.locus9	1	1
ALP.EU.chr9.locus1	2	2
ALP.EU.chr9.locus10	1	1
ALP.EU.chr9.locus11	1	2
ALP.EU.chr9.locus12	15	6
ALP.EU.chr9.locus13	1	2
ALP.EU.chr9.locus2	1	2
ALP.EU.chr9.locus3	1	1
ALP.EU.chr9.locus4	3	2
ALP.EU.chr9.locus5	1	2
ALP.EU.chr9.locus6	1	1
ALP.EU.chr9.locus7	8	7
ALP.EU.chr9.locus8	0	1
ALP.EU.chr9.locus9	1	1
ALS.EU.chr12.locus1	1	1
ALS.EU.chr12.locus2	1	0
ALS.EU.chr17.locus1	0	1
ALS.EU.chr21.locus1	1	1
ALS.EU.chr9.locus1	2	5
ALT.EU.chr10.locus1	1	1
ALT.EU.chr10.locus10	1	2
ALT.EU.chr10.locus11	3	3
ALT.EU.chr10.locus2	1	0
ALT.EU.chr10.locus3	2	2
ALT.EU.chr10.locus4	1	1
ALT.EU.chr10.locus5	2	2
ALT.EU.chr10.locus6	1	0
ALT.EU.chr10.locus7	2	2
ALT.EU.chr10.locus8	1	3
ALT.EU.chr10.locus9	11	14
ALT.EU.chr11.locus1	2	2
ALT.EU.chr11.locus10	1	1
ALT.EU.chr11.locus11	0	1
ALT.EU.chr11.locus12	1	1
ALT.EU.chr11.locus13	2	1
ALT.EU.chr11.locus14	1	1
ALT.EU.chr11.locus15	2	2
ALT.EU.chr11.locus16	4	8
ALT.EU.chr11.locus17	1	1
ALT.EU.chr11.locus2	1	1
ALT.EU.chr11.locus3	0	1
ALT.EU.chr11.locus4	0	1
ALT.EU.chr11.locus5	1	1
ALT.EU.chr11.locus6	1	1
ALT.EU.chr11.locus7	1	1
ALT.EU.chr11.locus8	1	1
ALT.EU.chr11.locus9	0	1
ALT.EU.chr12.locus1	1	0
ALT.EU.chr12.locus10	1	2
ALT.EU.chr12.locus11	3	4
ALT.EU.chr12.locus12	2	2
ALT.EU.chr12.locus2	1	1
ALT.EU.chr12.locus3	3	3
ALT.EU.chr12.locus4	1	1
ALT.EU.chr12.locus5	1	0
ALT.EU.chr12.locus6	1	2
ALT.EU.chr12.locus7	1	1
ALT.EU.chr12.locus8	1	1
ALT.EU.chr12.locus9	1	1
ALT.EU.chr13.locus1	2	1
ALT.EU.chr13.locus2	1	0
ALT.EU.chr13.locus3	1	1
ALT.EU.chr13.locus4	1	0
ALT.EU.chr13.locus5	1	2
ALT.EU.chr14.locus1	1	3
ALT.EU.chr14.locus2	2	3
ALT.EU.chr14.locus3	1	1
ALT.EU.chr14.locus4	1	1
ALT.EU.chr14.locus5	2	2
ALT.EU.chr14.locus6	1	1
ALT.EU.chr15.locus1	3	5
ALT.EU.chr15.locus2	1	0
ALT.EU.chr15.locus3	0	1
ALT.EU.chr15.locus4	1	1
ALT.EU.chr15.locus5	1	1
ALT.EU.chr15.locus6	1	1
ALT.EU.chr16.locus1	2	1
ALT.EU.chr16.locus2	1	1
ALT.EU.chr16.locus3	1	1
ALT.EU.chr16.locus4	3	4
ALT.EU.chr16.locus5	1	2
ALT.EU.chr16.locus6	1	1
ALT.EU.chr17.locus1	1	1
ALT.EU.chr17.locus10	0	1
ALT.EU.chr17.locus11	1	2
ALT.EU.chr17.locus2	1	1
ALT.EU.chr17.locus3	2	2
ALT.EU.chr17.locus4	0	1
ALT.EU.chr17.locus5	1	1
ALT.EU.chr17.locus6	1	1
ALT.EU.chr17.locus7	2	1
ALT.EU.chr17.locus8	1	2
ALT.EU.chr17.locus9	0	1
ALT.EU.chr18.locus1	0	1
ALT.EU.chr18.locus2	5	7
ALT.EU.chr18.locus3	1	2
ALT.EU.chr19.locus1	1	2
ALT.EU.chr19.locus2	1	2
ALT.EU.chr19.locus3	6	7
ALT.EU.chr19.locus4	1	1
ALT.EU.chr19.locus5	0	1
ALT.EU.chr19.locus6	1	1
ALT.EU.chr19.locus7	2	1
ALT.EU.chr19.locus8	2	2
ALT.EU.chr19.locus9	1	0
ALT.EU.chr1.locus1	1	1
ALT.EU.chr1.locus10	1	1
ALT.EU.chr1.locus11	1	1
ALT.EU.chr1.locus12	1	1
ALT.EU.chr1.locus13	2	2
ALT.EU.chr1.locus14	2	4
ALT.EU.chr1.locus15	4	5
ALT.EU.chr1.locus16	1	1
ALT.EU.chr1.locus17	0	1
ALT.EU.chr1.locus18	1	0
ALT.EU.chr1.locus19	2	1
ALT.EU.chr1.locus2	0	1
ALT.EU.chr1.locus20	3	3
ALT.EU.chr1.locus21	1	1
ALT.EU.chr1.locus3	2	3
ALT.EU.chr1.locus4	0	1
ALT.EU.chr1.locus5	1	3
ALT.EU.chr1.locus6	1	1
ALT.EU.chr1.locus7	1	0
ALT.EU.chr1.locus8	1	1
ALT.EU.chr1.locus9	1	1
ALT.EU.chr20.locus1	1	1
ALT.EU.chr20.locus2	1	0
ALT.EU.chr20.locus3	2	2
ALT.EU.chr20.locus4	0	1
ALT.EU.chr20.locus5	1	0
ALT.EU.chr20.locus6	1	1
ALT.EU.chr20.locus7	1	1
ALT.EU.chr20.locus8	1	1
ALT.EU.chr20.locus9	1	3
ALT.EU.chr21.locus1	1	1
ALT.EU.chr21.locus2	1	1
ALT.EU.chr21.locus3	0	1
ALT.EU.chr21.locus4	1	1
ALT.EU.chr21.locus5	1	2
ALT.EU.chr22.locus1	1	2
ALT.EU.chr22.locus2	2	2
ALT.EU.chr22.locus3	11	5
ALT.EU.chr22.locus4	1	1
ALT.EU.chr2.locus1	1	1
ALT.EU.chr2.locus10	4	5
ALT.EU.chr2.locus11	1	2
ALT.EU.chr2.locus12	2	3
ALT.EU.chr2.locus13	2	3
ALT.EU.chr2.locus2	1	1
ALT.EU.chr2.locus3	1	0
ALT.EU.chr2.locus4	1	1
ALT.EU.chr2.locus5	1	1
ALT.EU.chr2.locus6	2	3
ALT.EU.chr2.locus7	1	2
ALT.EU.chr2.locus8	1	1
ALT.EU.chr2.locus9	1	2
ALT.EU.chr3.locus1	3	4
ALT.EU.chr3.locus10	1	1
ALT.EU.chr3.locus11	3	2
ALT.EU.chr3.locus12	1	1
ALT.EU.chr3.locus2	1	0
ALT.EU.chr3.locus3	1	1
ALT.EU.chr3.locus4	3	2
ALT.EU.chr3.locus5	1	1
ALT.EU.chr3.locus6	4	2
ALT.EU.chr3.locus7	1	1
ALT.EU.chr3.locus8	1	0
ALT.EU.chr3.locus9	1	1
ALT.EU.chr4.locus1	1	1
ALT.EU.chr4.locus2	0	1
ALT.EU.chr4.locus3	0	1
ALT.EU.chr4.locus4	4	6
ALT.EU.chr4.locus5	1	2
ALT.EU.chr4.locus6	1	1
ALT.EU.chr4.locus7	1	1
ALT.EU.chr4.locus8	1	3
ALT.EU.chr5.locus1	1	1
ALT.EU.chr5.locus10	1	1
ALT.EU.chr5.locus2	1	1
ALT.EU.chr5.locus3	2	2
ALT.EU.chr5.locus4	1	1
ALT.EU.chr5.locus5	1	1
ALT.EU.chr5.locus6	2	3
ALT.EU.chr5.locus7	1	1
ALT.EU.chr5.locus8	1	2
ALT.EU.chr5.locus9	1	1
ALT.EU.chr6.locus1	1	1
ALT.EU.chr6.locus10	1	1
ALT.EU.chr6.locus11	1	1
ALT.EU.chr6.locus12	1	1
ALT.EU.chr6.locus13	1	1
ALT.EU.chr6.locus2	0	1
ALT.EU.chr6.locus3	0	1
ALT.EU.chr6.locus4	1	1
ALT.EU.chr6.locus5	2	1
ALT.EU.chr6.locus6	1	1
ALT.EU.chr6.locus7	2	2
ALT.EU.chr6.locus8	1	1
ALT.EU.chr6.locus9	1	1
ALT.EU.chr7.locus1	1	0
ALT.EU.chr7.locus2	1	1
ALT.EU.chr7.locus3	1	1
ALT.EU.chr7.locus4	0	1
ALT.EU.chr7.locus5	2	2
ALT.EU.chr7.locus6	2	3
ALT.EU.chr7.locus7	1	1
ALT.EU.chr7.locus8	1	1
ALT.EU.chr7.locus9	0	1
ALT.EU.chr8.locus1	1	3
ALT.EU.chr8.locus10	4	6
ALT.EU.chr8.locus11	2	2
ALT.EU.chr8.locus12	2	4
ALT.EU.chr8.locus2	1	2
ALT.EU.chr8.locus3	2	6
ALT.EU.chr8.locus4	0	1
ALT.EU.chr8.locus5	1	1
ALT.EU.chr8.locus6	1	1
ALT.EU.chr8.locus7	1	1
ALT.EU.chr8.locus8	0	1
ALT.EU.chr8.locus9	1	1
ALT.EU.chr9.locus1	1	1
ALT.EU.chr9.locus2	1	1
ALT.EU.chr9.locus3	2	3
ALT.EU.chr9.locus4	1	1
ALT.EU.chr9.locus5	0	1
ALT.EU.chr9.locus6	1	1
ALT.EU.chr9.locus7	5	5
ALT.EU.chr9.locus8	1	1
ALT.EU.chr9.locus9	1	2
AMD.EU.chr10.locus1	15	11
AMD.EU.chr14.locus1	1	0
AMD.EU.chr19.locus1	1	1
AMD.EU.chr19.locus2	1	1
AMD.EU.chr1.locus1	3	3
AMD.EU.chr1.locus2	11	6
AMD.EU.chr1.locus3	4	8
AMD.EU.chr1.locus4	5	4
AMD.EU.chr1.locus5	1	0
AMD.EU.chr3.locus1	1	0
AMD.EU.chr7.locus1	1	0
Ap-LM.EU.chr10.locus1	2	2
Ap-LM.EU.chr10.locus10	1	1
Ap-LM.EU.chr10.locus11	0	1
Ap-LM.EU.chr10.locus12	1	2
Ap-LM.EU.chr10.locus13	2	2
Ap-LM.EU.chr10.locus14	2	2
Ap-LM.EU.chr10.locus15	4	9
Ap-LM.EU.chr10.locus16	2	3
Ap-LM.EU.chr10.locus17	2	2
Ap-LM.EU.chr10.locus18	2	3
Ap-LM.EU.chr10.locus19	2	3
Ap-LM.EU.chr10.locus2	1	1
Ap-LM.EU.chr10.locus20	2	2
Ap-LM.EU.chr10.locus21	1	2
Ap-LM.EU.chr10.locus22	2	3
Ap-LM.EU.chr10.locus23	7	10
Ap-LM.EU.chr10.locus24	1	1
Ap-LM.EU.chr10.locus25	4	5
Ap-LM.EU.chr10.locus26	3	4
Ap-LM.EU.chr10.locus27	1	1
Ap-LM.EU.chr10.locus28	2	5
Ap-LM.EU.chr10.locus29	2	3
Ap-LM.EU.chr10.locus3	1	1
Ap-LM.EU.chr10.locus30	1	2
Ap-LM.EU.chr10.locus31	2	2
Ap-LM.EU.chr10.locus32	2	2
Ap-LM.EU.chr10.locus4	0	1
Ap-LM.EU.chr10.locus5	3	4
Ap-LM.EU.chr10.locus6	5	6
Ap-LM.EU.chr10.locus7	1	2
Ap-LM.EU.chr10.locus8	1	1
Ap-LM.EU.chr10.locus9	1	2
Ap-LM.EU.chr11.locus1	8	9
Ap-LM.EU.chr11.locus10	1	1
Ap-LM.EU.chr11.locus11	1	2
Ap-LM.EU.chr11.locus12	1	1
Ap-LM.EU.chr11.locus13	2	3
Ap-LM.EU.chr11.locus14	2	5
Ap-LM.EU.chr11.locus15	1	2
Ap-LM.EU.chr11.locus16	1	3
Ap-LM.EU.chr11.locus17	1	0
Ap-LM.EU.chr11.locus18	0	2
Ap-LM.EU.chr11.locus19	2	1
Ap-LM.EU.chr11.locus2	5	7
Ap-LM.EU.chr11.locus20	1	1
Ap-LM.EU.chr11.locus21	1	1
Ap-LM.EU.chr11.locus22	1	1
Ap-LM.EU.chr11.locus23	0	1
Ap-LM.EU.chr11.locus24	2	2
Ap-LM.EU.chr11.locus25	3	3
Ap-LM.EU.chr11.locus26	8	5
Ap-LM.EU.chr11.locus27	2	3
Ap-LM.EU.chr11.locus28	1	0
Ap-LM.EU.chr11.locus29	1	1
Ap-LM.EU.chr11.locus3	2	2
Ap-LM.EU.chr11.locus30	1	1
Ap-LM.EU.chr11.locus31	1	1
Ap-LM.EU.chr11.locus32	1	1
Ap-LM.EU.chr11.locus33	1	1
Ap-LM.EU.chr11.locus34	1	2
Ap-LM.EU.chr11.locus35	1	1
Ap-LM.EU.chr11.locus4	1	1
Ap-LM.EU.chr11.locus5	1	2
Ap-LM.EU.chr11.locus6	1	1
Ap-LM.EU.chr11.locus7	1	1
Ap-LM.EU.chr11.locus8	1	1
Ap-LM.EU.chr11.locus9	3	3
Ap-LM.EU.chr12.locus1	2	2
Ap-LM.EU.chr12.locus10	1	1
Ap-LM.EU.chr12.locus11	1	2
Ap-LM.EU.chr12.locus12	1	1
Ap-LM.EU.chr12.locus13	1	1
Ap-LM.EU.chr12.locus14	5	6
Ap-LM.EU.chr12.locus15	1	1
Ap-LM.EU.chr12.locus16	1	1
Ap-LM.EU.chr12.locus17	2	3
Ap-LM.EU.chr12.locus18	3	4
Ap-LM.EU.chr12.locus19	1	1
Ap-LM.EU.chr12.locus2	10	9
Ap-LM.EU.chr12.locus20	7	11
Ap-LM.EU.chr12.locus21	2	3
Ap-LM.EU.chr12.locus22	1	1
Ap-LM.EU.chr12.locus23	3	3
Ap-LM.EU.chr12.locus24	1	2
Ap-LM.EU.chr12.locus25	1	1
Ap-LM.EU.chr12.locus26	5	5
Ap-LM.EU.chr12.locus27	1	1
Ap-LM.EU.chr12.locus28	9	13
Ap-LM.EU.chr12.locus29	2	3
Ap-LM.EU.chr12.locus3	3	4
Ap-LM.EU.chr12.locus30	1	1
Ap-LM.EU.chr12.locus31	1	1
Ap-LM.EU.chr12.locus32	1	1
Ap-LM.EU.chr12.locus33	1	1
Ap-LM.EU.chr12.locus34	3	4
Ap-LM.EU.chr12.locus35	1	1
Ap-LM.EU.chr12.locus36	2	2
Ap-LM.EU.chr12.locus37	1	2
Ap-LM.EU.chr12.locus38	3	6
Ap-LM.EU.chr12.locus39	4	7
Ap-LM.EU.chr12.locus4	1	3
Ap-LM.EU.chr12.locus40	3	4
Ap-LM.EU.chr12.locus5	1	1
Ap-LM.EU.chr12.locus6	1	1
Ap-LM.EU.chr12.locus7	3	4
Ap-LM.EU.chr12.locus8	1	1
Ap-LM.EU.chr12.locus9	3	3
Ap-LM.EU.chr13.locus1	2	3
Ap-LM.EU.chr13.locus10	1	3
Ap-LM.EU.chr13.locus11	1	1
Ap-LM.EU.chr13.locus12	2	2
Ap-LM.EU.chr13.locus13	1	1
Ap-LM.EU.chr13.locus14	2	2
Ap-LM.EU.chr13.locus15	1	1
Ap-LM.EU.chr13.locus16	2	3
Ap-LM.EU.chr13.locus2	2	3
Ap-LM.EU.chr13.locus3	2	2
Ap-LM.EU.chr13.locus4	1	1
Ap-LM.EU.chr13.locus5	1	1
Ap-LM.EU.chr13.locus6	1	1
Ap-LM.EU.chr13.locus7	0	2
Ap-LM.EU.chr13.locus8	11	9
Ap-LM.EU.chr13.locus9	4	5
Ap-LM.EU.chr14.locus1	3	4
Ap-LM.EU.chr14.locus10	2	2
Ap-LM.EU.chr14.locus11	4	2
Ap-LM.EU.chr14.locus12	1	2
Ap-LM.EU.chr14.locus13	2	4
Ap-LM.EU.chr14.locus14	1	1
Ap-LM.EU.chr14.locus15	1	1
Ap-LM.EU.chr14.locus16	1	1
Ap-LM.EU.chr14.locus17	4	5
Ap-LM.EU.chr14.locus18	1	1
Ap-LM.EU.chr14.locus19	1	2
Ap-LM.EU.chr14.locus2	2	3
Ap-LM.EU.chr14.locus20	1	1
Ap-LM.EU.chr14.locus21	2	2
Ap-LM.EU.chr14.locus22	2	2
Ap-LM.EU.chr14.locus3	4	4
Ap-LM.EU.chr14.locus4	2	2
Ap-LM.EU.chr14.locus5	0	1
Ap-LM.EU.chr14.locus6	1	1
Ap-LM.EU.chr14.locus7	1	1
Ap-LM.EU.chr14.locus8	4	5
Ap-LM.EU.chr14.locus9	2	2
Ap-LM.EU.chr15.locus1	1	1
Ap-LM.EU.chr15.locus10	4	4
Ap-LM.EU.chr15.locus11	1	2
Ap-LM.EU.chr15.locus12	3	4
Ap-LM.EU.chr15.locus13	2	2
Ap-LM.EU.chr15.locus14	1	2
Ap-LM.EU.chr15.locus15	3	4
Ap-LM.EU.chr15.locus16	2	2
Ap-LM.EU.chr15.locus17	1	1
Ap-LM.EU.chr15.locus18	0	1
Ap-LM.EU.chr15.locus19	1	3
Ap-LM.EU.chr15.locus2	2	2
Ap-LM.EU.chr15.locus20	2	2
Ap-LM.EU.chr15.locus21	3	5
Ap-LM.EU.chr15.locus22	7	7
Ap-LM.EU.chr15.locus23	1	2
Ap-LM.EU.chr15.locus24	1	1
Ap-LM.EU.chr15.locus25	4	5
Ap-LM.EU.chr15.locus26	1	2
Ap-LM.EU.chr15.locus3	1	2
Ap-LM.EU.chr15.locus4	3	5
Ap-LM.EU.chr15.locus5	2	2
Ap-LM.EU.chr15.locus6	1	1
Ap-LM.EU.chr15.locus7	1	1
Ap-LM.EU.chr15.locus8	3	5
Ap-LM.EU.chr15.locus9	2	2
Ap-LM.EU.chr16.locus1	7	7
Ap-LM.EU.chr16.locus10	1	1
Ap-LM.EU.chr16.locus11	2	5
Ap-LM.EU.chr16.locus12	1	1
Ap-LM.EU.chr16.locus13	3	4
Ap-LM.EU.chr16.locus14	2	2
Ap-LM.EU.chr16.locus15	1	2
Ap-LM.EU.chr16.locus16	1	1
Ap-LM.EU.chr16.locus17	1	1
Ap-LM.EU.chr16.locus18	1	2
Ap-LM.EU.chr16.locus19	4	4
Ap-LM.EU.chr16.locus2	6	2
Ap-LM.EU.chr16.locus20	8	7
Ap-LM.EU.chr16.locus21	1	1
Ap-LM.EU.chr16.locus3	1	2
Ap-LM.EU.chr16.locus4	1	2
Ap-LM.EU.chr16.locus5	1	2
Ap-LM.EU.chr16.locus6	2	2
Ap-LM.EU.chr16.locus7	3	3
Ap-LM.EU.chr16.locus8	1	1
Ap-LM.EU.chr16.locus9	3	5
Ap-LM.EU.chr17.locus1	1	1
Ap-LM.EU.chr17.locus10	1	2
Ap-LM.EU.chr17.locus11	4	8
Ap-LM.EU.chr17.locus12	3	5
Ap-LM.EU.chr17.locus13	1	1
Ap-LM.EU.chr17.locus14	2	2
Ap-LM.EU.chr17.locus15	6	9
Ap-LM.EU.chr17.locus16	1	1
Ap-LM.EU.chr17.locus17	1	1
Ap-LM.EU.chr17.locus18	5	5
Ap-LM.EU.chr17.locus19	0	1
Ap-LM.EU.chr17.locus2	2	3
Ap-LM.EU.chr17.locus20	4	5
Ap-LM.EU.chr17.locus21	5	5
Ap-LM.EU.chr17.locus22	10	13
Ap-LM.EU.chr17.locus23	7	7
Ap-LM.EU.chr17.locus24	4	5
Ap-LM.EU.chr17.locus25	3	3
Ap-LM.EU.chr17.locus26	1	2
Ap-LM.EU.chr17.locus27	0	1
Ap-LM.EU.chr17.locus28	1	1
Ap-LM.EU.chr17.locus29	1	1
Ap-LM.EU.chr17.locus3	1	1
Ap-LM.EU.chr17.locus30	4	4
Ap-LM.EU.chr17.locus31	1	1
Ap-LM.EU.chr17.locus4	6	6
Ap-LM.EU.chr17.locus5	1	1
Ap-LM.EU.chr17.locus6	1	1
Ap-LM.EU.chr17.locus7	1	2
Ap-LM.EU.chr17.locus8	1	2
Ap-LM.EU.chr17.locus9	2	3
Ap-LM.EU.chr18.locus1	1	1
Ap-LM.EU.chr18.locus10	5	5
Ap-LM.EU.chr18.locus11	2	3
Ap-LM.EU.chr18.locus12	1	1
Ap-LM.EU.chr18.locus13	2	3
Ap-LM.EU.chr18.locus2	1	1
Ap-LM.EU.chr18.locus3	2	4
Ap-LM.EU.chr18.locus4	0	1
Ap-LM.EU.chr18.locus5	1	1
Ap-LM.EU.chr18.locus6	1	1
Ap-LM.EU.chr18.locus7	4	4
Ap-LM.EU.chr18.locus8	1	3
Ap-LM.EU.chr18.locus9	1	2
Ap-LM.EU.chr19.locus1	4	4
Ap-LM.EU.chr19.locus10	5	5
Ap-LM.EU.chr19.locus11	2	2
Ap-LM.EU.chr19.locus12	1	2
Ap-LM.EU.chr19.locus13	1	2
Ap-LM.EU.chr19.locus14	2	2
Ap-LM.EU.chr19.locus15	1	1
Ap-LM.EU.chr19.locus16	3	3
Ap-LM.EU.chr19.locus17	1	2
Ap-LM.EU.chr19.locus18	1	1
Ap-LM.EU.chr19.locus19	3	3
Ap-LM.EU.chr19.locus2	5	5
Ap-LM.EU.chr19.locus20	3	3
Ap-LM.EU.chr19.locus21	2	4
Ap-LM.EU.chr19.locus3	4	5
Ap-LM.EU.chr19.locus4	3	3
Ap-LM.EU.chr19.locus5	2	4
Ap-LM.EU.chr19.locus6	4	4
Ap-LM.EU.chr19.locus7	1	2
Ap-LM.EU.chr19.locus8	1	2
Ap-LM.EU.chr19.locus9	1	1
Ap-LM.EU.chr1.locus1	3	5
Ap-LM.EU.chr1.locus10	1	1
Ap-LM.EU.chr1.locus11	2	3
Ap-LM.EU.chr1.locus12	1	1
Ap-LM.EU.chr1.locus13	2	2
Ap-LM.EU.chr1.locus14	1	3
Ap-LM.EU.chr1.locus15	2	2
Ap-LM.EU.chr1.locus16	3	5
Ap-LM.EU.chr1.locus17	1	1
Ap-LM.EU.chr1.locus18	1	2
Ap-LM.EU.chr1.locus19	2	2
Ap-LM.EU.chr1.locus2	2	3
Ap-LM.EU.chr1.locus20	1	1
Ap-LM.EU.chr1.locus21	0	1
Ap-LM.EU.chr1.locus22	2	2
Ap-LM.EU.chr1.locus23	2	3
Ap-LM.EU.chr1.locus24	1	1
Ap-LM.EU.chr1.locus25	1	1
Ap-LM.EU.chr1.locus26	1	2
Ap-LM.EU.chr1.locus27	0	1
Ap-LM.EU.chr1.locus28	2	2
Ap-LM.EU.chr1.locus29	1	2
Ap-LM.EU.chr1.locus3	2	1
Ap-LM.EU.chr1.locus30	2	2
Ap-LM.EU.chr1.locus31	1	2
Ap-LM.EU.chr1.locus32	2	3
Ap-LM.EU.chr1.locus33	1	1
Ap-LM.EU.chr1.locus34	3	2
Ap-LM.EU.chr1.locus35	1	1
Ap-LM.EU.chr1.locus36	1	1
Ap-LM.EU.chr1.locus37	1	1
Ap-LM.EU.chr1.locus38	4	6
Ap-LM.EU.chr1.locus39	6	9
Ap-LM.EU.chr1.locus4	3	5
Ap-LM.EU.chr1.locus40	1	2
Ap-LM.EU.chr1.locus41	1	2
Ap-LM.EU.chr1.locus42	1	1
Ap-LM.EU.chr1.locus43	1	1
Ap-LM.EU.chr1.locus44	3	3
Ap-LM.EU.chr1.locus45	4	5
Ap-LM.EU.chr1.locus46	8	5
Ap-LM.EU.chr1.locus47	1	1
Ap-LM.EU.chr1.locus48	1	1
Ap-LM.EU.chr1.locus49	2	2
Ap-LM.EU.chr1.locus5	0	1
Ap-LM.EU.chr1.locus50	1	1
Ap-LM.EU.chr1.locus51	2	2
Ap-LM.EU.chr1.locus52	2	3
Ap-LM.EU.chr1.locus53	0	1
Ap-LM.EU.chr1.locus54	2	4
Ap-LM.EU.chr1.locus55	1	2
Ap-LM.EU.chr1.locus56	2	2
Ap-LM.EU.chr1.locus57	4	4
Ap-LM.EU.chr1.locus58	5	9
Ap-LM.EU.chr1.locus59	2	2
Ap-LM.EU.chr1.locus6	2	3
Ap-LM.EU.chr1.locus60	1	1
Ap-LM.EU.chr1.locus61	2	2
Ap-LM.EU.chr1.locus62	2	2
Ap-LM.EU.chr1.locus63	1	1
Ap-LM.EU.chr1.locus64	1	1
Ap-LM.EU.chr1.locus65	1	1
Ap-LM.EU.chr1.locus66	2	3
Ap-LM.EU.chr1.locus7	4	3
Ap-LM.EU.chr1.locus8	2	3
Ap-LM.EU.chr1.locus9	3	3
Ap-LM.EU.chr20.locus1	1	2
Ap-LM.EU.chr20.locus10	5	5
Ap-LM.EU.chr20.locus11	2	2
Ap-LM.EU.chr20.locus12	1	2
Ap-LM.EU.chr20.locus13	1	1
Ap-LM.EU.chr20.locus14	1	1
Ap-LM.EU.chr20.locus15	3	4
Ap-LM.EU.chr20.locus16	1	1
Ap-LM.EU.chr20.locus17	2	2
Ap-LM.EU.chr20.locus18	2	2
Ap-LM.EU.chr20.locus19	3	3
Ap-LM.EU.chr20.locus2	3	4
Ap-LM.EU.chr20.locus20	2	2
Ap-LM.EU.chr20.locus21	1	0
Ap-LM.EU.chr20.locus3	0	2
Ap-LM.EU.chr20.locus4	1	1
Ap-LM.EU.chr20.locus5	3	4
Ap-LM.EU.chr20.locus6	2	2
Ap-LM.EU.chr20.locus7	3	2
Ap-LM.EU.chr20.locus8	5	7
Ap-LM.EU.chr20.locus9	5	20
Ap-LM.EU.chr21.locus1	1	2
Ap-LM.EU.chr21.locus2	0	1
Ap-LM.EU.chr21.locus3	1	1
Ap-LM.EU.chr21.locus4	1	2
Ap-LM.EU.chr21.locus5	2	2
Ap-LM.EU.chr21.locus6	2	3
Ap-LM.EU.chr21.locus7	2	2
Ap-LM.EU.chr22.locus1	1	1
Ap-LM.EU.chr22.locus10	2	2
Ap-LM.EU.chr22.locus2	2	2
Ap-LM.EU.chr22.locus3	2	2
Ap-LM.EU.chr22.locus4	1	1
Ap-LM.EU.chr22.locus5	1	2
Ap-LM.EU.chr22.locus6	1	1
Ap-LM.EU.chr22.locus7	1	2
Ap-LM.EU.chr22.locus8	2	3
Ap-LM.EU.chr22.locus9	1	1
Ap-LM.EU.chr2.locus1	3	5
Ap-LM.EU.chr2.locus10	1	3
Ap-LM.EU.chr2.locus11	4	7
Ap-LM.EU.chr2.locus12	1	1
Ap-LM.EU.chr2.locus13	4	4
Ap-LM.EU.chr2.locus14	1	1
Ap-LM.EU.chr2.locus15	1	1
Ap-LM.EU.chr2.locus16	1	1
Ap-LM.EU.chr2.locus17	2	3
Ap-LM.EU.chr2.locus18	1	2
Ap-LM.EU.chr2.locus19	2	2
Ap-LM.EU.chr2.locus2	1	1
Ap-LM.EU.chr2.locus20	2	4
Ap-LM.EU.chr2.locus21	3	3
Ap-LM.EU.chr2.locus22	1	1
Ap-LM.EU.chr2.locus23	4	5
Ap-LM.EU.chr2.locus24	1	1
Ap-LM.EU.chr2.locus25	2	2
Ap-LM.EU.chr2.locus26	2	2
Ap-LM.EU.chr2.locus27	4	5
Ap-LM.EU.chr2.locus28	2	2
Ap-LM.EU.chr2.locus29	1	2
Ap-LM.EU.chr2.locus3	1	1
Ap-LM.EU.chr2.locus30	1	1
Ap-LM.EU.chr2.locus31	1	1
Ap-LM.EU.chr2.locus32	3	4
Ap-LM.EU.chr2.locus33	1	1
Ap-LM.EU.chr2.locus34	2	2
Ap-LM.EU.chr2.locus35	3	5
Ap-LM.EU.chr2.locus36	2	2
Ap-LM.EU.chr2.locus37	1	1
Ap-LM.EU.chr2.locus38	0	1
Ap-LM.EU.chr2.locus39	1	1
Ap-LM.EU.chr2.locus4	1	1
Ap-LM.EU.chr2.locus40	1	2
Ap-LM.EU.chr2.locus41	2	2
Ap-LM.EU.chr2.locus42	1	1
Ap-LM.EU.chr2.locus43	4	6
Ap-LM.EU.chr2.locus44	1	1
Ap-LM.EU.chr2.locus45	2	4
Ap-LM.EU.chr2.locus46	2	2
Ap-LM.EU.chr2.locus47	1	2
Ap-LM.EU.chr2.locus48	2	3
Ap-LM.EU.chr2.locus49	1	1
Ap-LM.EU.chr2.locus5	1	1
Ap-LM.EU.chr2.locus50	2	3
Ap-LM.EU.chr2.locus51	1	2
Ap-LM.EU.chr2.locus52	1	1
Ap-LM.EU.chr2.locus53	1	2
Ap-LM.EU.chr2.locus54	2	2
Ap-LM.EU.chr2.locus55	1	1
Ap-LM.EU.chr2.locus56	1	3
Ap-LM.EU.chr2.locus57	1	1
Ap-LM.EU.chr2.locus58	1	2
Ap-LM.EU.chr2.locus59	5	5
Ap-LM.EU.chr2.locus6	1	1
Ap-LM.EU.chr2.locus60	3	4
Ap-LM.EU.chr2.locus61	1	1
Ap-LM.EU.chr2.locus62	2	3
Ap-LM.EU.chr2.locus63	4	4
Ap-LM.EU.chr2.locus64	9	5
Ap-LM.EU.chr2.locus65	10	11
Ap-LM.EU.chr2.locus66	2	3
Ap-LM.EU.chr2.locus67	1	1
Ap-LM.EU.chr2.locus68	1	1
Ap-LM.EU.chr2.locus69	1	1
Ap-LM.EU.chr2.locus7	2	2
Ap-LM.EU.chr2.locus8	4	4
Ap-LM.EU.chr2.locus9	3	6
Ap-LM.EU.chr3.locus1	1	2
Ap-LM.EU.chr3.locus10	2	6
Ap-LM.EU.chr3.locus11	1	0
Ap-LM.EU.chr3.locus12	3	3
Ap-LM.EU.chr3.locus13	1	1
Ap-LM.EU.chr3.locus14	2	2
Ap-LM.EU.chr3.locus15	3	3
Ap-LM.EU.chr3.locus16	1	1
Ap-LM.EU.chr3.locus17	2	3
Ap-LM.EU.chr3.locus18	1	1
Ap-LM.EU.chr3.locus19	2	3
Ap-LM.EU.chr3.locus2	6	8
Ap-LM.EU.chr3.locus20	1	1
Ap-LM.EU.chr3.locus21	1	1
Ap-LM.EU.chr3.locus22	1	1
Ap-LM.EU.chr3.locus23	2	2
Ap-LM.EU.chr3.locus24	1	1
Ap-LM.EU.chr3.locus25	2	4
Ap-LM.EU.chr3.locus26	1	1
Ap-LM.EU.chr3.locus27	2	3
Ap-LM.EU.chr3.locus28	6	8
Ap-LM.EU.chr3.locus29	0	1
Ap-LM.EU.chr3.locus3	2	2
Ap-LM.EU.chr3.locus30	2	2
Ap-LM.EU.chr3.locus31	1	1
Ap-LM.EU.chr3.locus32	1	2
Ap-LM.EU.chr3.locus33	2	2
Ap-LM.EU.chr3.locus34	2	2
Ap-LM.EU.chr3.locus35	8	10
Ap-LM.EU.chr3.locus36	1	2
Ap-LM.EU.chr3.locus37	4	4
Ap-LM.EU.chr3.locus38	1	1
Ap-LM.EU.chr3.locus39	1	1
Ap-LM.EU.chr3.locus4	2	2
Ap-LM.EU.chr3.locus5	1	3
Ap-LM.EU.chr3.locus6	1	2
Ap-LM.EU.chr3.locus7	4	6
Ap-LM.EU.chr3.locus8	1	3
Ap-LM.EU.chr3.locus9	1	1
Ap-LM.EU.chr4.locus1	4	4
Ap-LM.EU.chr4.locus10	1	2
Ap-LM.EU.chr4.locus11	2	3
Ap-LM.EU.chr4.locus12	1	1
Ap-LM.EU.chr4.locus13	1	1
Ap-LM.EU.chr4.locus14	1	2
Ap-LM.EU.chr4.locus15	2	2
Ap-LM.EU.chr4.locus16	2	2
Ap-LM.EU.chr4.locus17	1	1
Ap-LM.EU.chr4.locus18	3	3
Ap-LM.EU.chr4.locus19	1	1
Ap-LM.EU.chr4.locus2	1	2
Ap-LM.EU.chr4.locus20	1	2
Ap-LM.EU.chr4.locus21	1	1
Ap-LM.EU.chr4.locus22	1	1
Ap-LM.EU.chr4.locus23	4	4
Ap-LM.EU.chr4.locus24	1	1
Ap-LM.EU.chr4.locus25	1	1
Ap-LM.EU.chr4.locus26	3	4
Ap-LM.EU.chr4.locus27	2	3
Ap-LM.EU.chr4.locus28	2	3
Ap-LM.EU.chr4.locus29	1	3
Ap-LM.EU.chr4.locus3	2	5
Ap-LM.EU.chr4.locus30	1	1
Ap-LM.EU.chr4.locus31	8	10
Ap-LM.EU.chr4.locus32	1	0
Ap-LM.EU.chr4.locus33	0	1
Ap-LM.EU.chr4.locus34	1	1
Ap-LM.EU.chr4.locus35	1	2
Ap-LM.EU.chr4.locus36	1	1
Ap-LM.EU.chr4.locus37	3	5
Ap-LM.EU.chr4.locus38	1	1
Ap-LM.EU.chr4.locus4	1	1
Ap-LM.EU.chr4.locus5	1	1
Ap-LM.EU.chr4.locus6	2	3
Ap-LM.EU.chr4.locus7	6	7
Ap-LM.EU.chr4.locus8	1	1
Ap-LM.EU.chr4.locus9	2	4
Ap-LM.EU.chr5.locus1	1	2
Ap-LM.EU.chr5.locus10	2	3
Ap-LM.EU.chr5.locus11	2	2
Ap-LM.EU.chr5.locus12	5	7
Ap-LM.EU.chr5.locus13	2	3
Ap-LM.EU.chr5.locus14	1	1
Ap-LM.EU.chr5.locus15	1	3
Ap-LM.EU.chr5.locus16	1	2
Ap-LM.EU.chr5.locus17	1	1
Ap-LM.EU.chr5.locus18	1	1
Ap-LM.EU.chr5.locus19	1	1
Ap-LM.EU.chr5.locus2	3	4
Ap-LM.EU.chr5.locus20	3	5
Ap-LM.EU.chr5.locus21	3	3
Ap-LM.EU.chr5.locus22	7	7
Ap-LM.EU.chr5.locus23	2	3
Ap-LM.EU.chr5.locus24	1	1
Ap-LM.EU.chr5.locus25	1	3
Ap-LM.EU.chr5.locus26	4	4
Ap-LM.EU.chr5.locus27	1	1
Ap-LM.EU.chr5.locus28	1	1
Ap-LM.EU.chr5.locus29	1	1
Ap-LM.EU.chr5.locus3	2	2
Ap-LM.EU.chr5.locus30	2	4
Ap-LM.EU.chr5.locus31	1	1
Ap-LM.EU.chr5.locus32	1	2
Ap-LM.EU.chr5.locus33	2	2
Ap-LM.EU.chr5.locus34	2	2
Ap-LM.EU.chr5.locus35	1	2
Ap-LM.EU.chr5.locus36	5	6
Ap-LM.EU.chr5.locus37	1	3
Ap-LM.EU.chr5.locus38	1	1
Ap-LM.EU.chr5.locus4	3	4
Ap-LM.EU.chr5.locus5	0	1
Ap-LM.EU.chr5.locus6	1	2
Ap-LM.EU.chr5.locus7	4	6
Ap-LM.EU.chr5.locus8	7	9
Ap-LM.EU.chr5.locus9	2	3
Ap-LM.EU.chr6.locus1	1	1
Ap-LM.EU.chr6.locus10	9	11
Ap-LM.EU.chr6.locus11	6	8
Ap-LM.EU.chr6.locus12	1	2
Ap-LM.EU.chr6.locus13	2	3
Ap-LM.EU.chr6.locus14	3	4
Ap-LM.EU.chr6.locus15	1	1
Ap-LM.EU.chr6.locus16	2	3
Ap-LM.EU.chr6.locus17	1	2
Ap-LM.EU.chr6.locus18	1	1
Ap-LM.EU.chr6.locus19	1	1
Ap-LM.EU.chr6.locus2	1	2
Ap-LM.EU.chr6.locus20	1	1
Ap-LM.EU.chr6.locus21	1	1
Ap-LM.EU.chr6.locus22	6	7
Ap-LM.EU.chr6.locus23	1	2
Ap-LM.EU.chr6.locus24	1	1
Ap-LM.EU.chr6.locus25	1	1
Ap-LM.EU.chr6.locus26	1	2
Ap-LM.EU.chr6.locus27	0	1
Ap-LM.EU.chr6.locus28	1	1
Ap-LM.EU.chr6.locus29	1	1
Ap-LM.EU.chr6.locus3	3	4
Ap-LM.EU.chr6.locus30	4	4
Ap-LM.EU.chr6.locus31	1	1
Ap-LM.EU.chr6.locus32	1	1
Ap-LM.EU.chr6.locus33	5	7
Ap-LM.EU.chr6.locus34	3	4
Ap-LM.EU.chr6.locus35	5	5
Ap-LM.EU.chr6.locus36	1	2
Ap-LM.EU.chr6.locus37	1	1
Ap-LM.EU.chr6.locus38	1	1
Ap-LM.EU.chr6.locus39	3	3
Ap-LM.EU.chr6.locus4	1	1
Ap-LM.EU.chr6.locus40	1	1
Ap-LM.EU.chr6.locus41	3	4
Ap-LM.EU.chr6.locus42	1	1
Ap-LM.EU.chr6.locus43	1	1
Ap-LM.EU.chr6.locus44	4	7
Ap-LM.EU.chr6.locus45	1	2
Ap-LM.EU.chr6.locus46	0	1
Ap-LM.EU.chr6.locus47	2	3
Ap-LM.EU.chr6.locus48	3	3
Ap-LM.EU.chr6.locus49	3	6
Ap-LM.EU.chr6.locus5	1	1
Ap-LM.EU.chr6.locus50	3	4
Ap-LM.EU.chr6.locus6	2	3
Ap-LM.EU.chr6.locus7	1	2
Ap-LM.EU.chr6.locus8	3	3
Ap-LM.EU.chr6.locus9	1	3
Ap-LM.EU.chr7.locus1	1	1
Ap-LM.EU.chr7.locus10	3	3
Ap-LM.EU.chr7.locus11	2	3
Ap-LM.EU.chr7.locus12	1	1
Ap-LM.EU.chr7.locus13	1	1
Ap-LM.EU.chr7.locus14	5	7
Ap-LM.EU.chr7.locus15	3	4
Ap-LM.EU.chr7.locus16	1	2
Ap-LM.EU.chr7.locus17	1	2
Ap-LM.EU.chr7.locus18	1	1
Ap-LM.EU.chr7.locus19	1	2
Ap-LM.EU.chr7.locus2	3	4
Ap-LM.EU.chr7.locus20	2	2
Ap-LM.EU.chr7.locus21	6	8
Ap-LM.EU.chr7.locus22	2	3
Ap-LM.EU.chr7.locus23	1	1
Ap-LM.EU.chr7.locus24	0	1
Ap-LM.EU.chr7.locus25	1	1
Ap-LM.EU.chr7.locus26	1	1
Ap-LM.EU.chr7.locus27	2	3
Ap-LM.EU.chr7.locus28	2	3
Ap-LM.EU.chr7.locus29	1	1
Ap-LM.EU.chr7.locus3	1	1
Ap-LM.EU.chr7.locus30	5	5
Ap-LM.EU.chr7.locus31	9	7
Ap-LM.EU.chr7.locus32	1	1
Ap-LM.EU.chr7.locus4	2	2
Ap-LM.EU.chr7.locus5	1	2
Ap-LM.EU.chr7.locus6	3	5
Ap-LM.EU.chr7.locus7	1	3
Ap-LM.EU.chr7.locus8	2	2
Ap-LM.EU.chr7.locus9	1	2
Ap-LM.EU.chr8.locus1	3	5
Ap-LM.EU.chr8.locus10	0	1
Ap-LM.EU.chr8.locus11	1	1
Ap-LM.EU.chr8.locus12	1	2
Ap-LM.EU.chr8.locus13	2	1
Ap-LM.EU.chr8.locus14	5	5
Ap-LM.EU.chr8.locus15	1	2
Ap-LM.EU.chr8.locus16	1	2
Ap-LM.EU.chr8.locus17	1	1
Ap-LM.EU.chr8.locus18	1	1
Ap-LM.EU.chr8.locus19	5	7
Ap-LM.EU.chr8.locus2	1	1
Ap-LM.EU.chr8.locus20	1	1
Ap-LM.EU.chr8.locus21	2	2
Ap-LM.EU.chr8.locus22	2	2
Ap-LM.EU.chr8.locus23	2	2
Ap-LM.EU.chr8.locus24	2	2
Ap-LM.EU.chr8.locus25	6	9
Ap-LM.EU.chr8.locus26	1	2
Ap-LM.EU.chr8.locus27	1	2
Ap-LM.EU.chr8.locus28	1	1
Ap-LM.EU.chr8.locus3	1	1
Ap-LM.EU.chr8.locus4	0	2
Ap-LM.EU.chr8.locus5	1	1
Ap-LM.EU.chr8.locus6	1	1
Ap-LM.EU.chr8.locus7	1	4
Ap-LM.EU.chr8.locus8	7	9
Ap-LM.EU.chr8.locus9	1	1
Ap-LM.EU.chr9.locus1	1	2
Ap-LM.EU.chr9.locus10	1	1
Ap-LM.EU.chr9.locus11	4	5
Ap-LM.EU.chr9.locus12	3	4
Ap-LM.EU.chr9.locus13	10	8
Ap-LM.EU.chr9.locus14	1	4
Ap-LM.EU.chr9.locus15	0	1
Ap-LM.EU.chr9.locus16	1	4
Ap-LM.EU.chr9.locus17	1	2
Ap-LM.EU.chr9.locus18	1	1
Ap-LM.EU.chr9.locus19	1	2
Ap-LM.EU.chr9.locus2	1	1
Ap-LM.EU.chr9.locus20	3	6
Ap-LM.EU.chr9.locus21	8	8
Ap-LM.EU.chr9.locus22	1	2
Ap-LM.EU.chr9.locus23	2	2
Ap-LM.EU.chr9.locus24	1	1
Ap-LM.EU.chr9.locus25	3	4
Ap-LM.EU.chr9.locus26	0	1
Ap-LM.EU.chr9.locus27	1	2
Ap-LM.EU.chr9.locus3	1	1
Ap-LM.EU.chr9.locus4	1	1
Ap-LM.EU.chr9.locus5	2	2
Ap-LM.EU.chr9.locus6	1	1
Ap-LM.EU.chr9.locus7	1	1
Ap-LM.EU.chr9.locus8	2	2
Ap-LM.EU.chr9.locus9	2	2
ApoB.EU.chr10.locus1	1	1
ApoB.EU.chr10.locus2	2	2
ApoB.EU.chr10.locus3	1	1
ApoB.EU.chr10.locus4	4	4
ApoB.EU.chr10.locus5	1	1
ApoB.EU.chr10.locus6	1	1
ApoB.EU.chr10.locus7	1	1
ApoB.EU.chr10.locus8	1	1
ApoB.EU.chr10.locus9	1	1
ApoB.EU.chr11.locus1	1	1
ApoB.EU.chr11.locus10	2	2
ApoB.EU.chr11.locus11	1	1
ApoB.EU.chr11.locus12	15	13
ApoB.EU.chr11.locus13	4	4
ApoB.EU.chr11.locus2	1	1
ApoB.EU.chr11.locus3	3	3
ApoB.EU.chr11.locus4	1	1
ApoB.EU.chr11.locus5	2	2
ApoB.EU.chr11.locus6	1	1
ApoB.EU.chr11.locus7	1	1
ApoB.EU.chr11.locus8	5	5
ApoB.EU.chr11.locus9	2	2
ApoB.EU.chr12.locus1	1	1
ApoB.EU.chr12.locus10	1	1
ApoB.EU.chr12.locus11	1	1
ApoB.EU.chr12.locus12	1	1
ApoB.EU.chr12.locus13	1	1
ApoB.EU.chr12.locus14	1	1
ApoB.EU.chr12.locus15	1	1
ApoB.EU.chr12.locus16	4	4
ApoB.EU.chr12.locus17	1	1
ApoB.EU.chr12.locus18	1	1
ApoB.EU.chr12.locus2	1	1
ApoB.EU.chr12.locus3	1	1
ApoB.EU.chr12.locus4	1	1
ApoB.EU.chr12.locus5	1	1
ApoB.EU.chr12.locus6	1	1
ApoB.EU.chr12.locus7	2	2
ApoB.EU.chr12.locus8	1	1
ApoB.EU.chr12.locus9	3	3
ApoB.EU.chr13.locus1	4	4
ApoB.EU.chr13.locus2	1	1
ApoB.EU.chr13.locus3	1	1
ApoB.EU.chr13.locus4	1	1
ApoB.EU.chr13.locus5	3	3
ApoB.EU.chr14.locus1	3	3
ApoB.EU.chr14.locus2	1	1
ApoB.EU.chr14.locus3	2	2
ApoB.EU.chr14.locus4	1	1
ApoB.EU.chr14.locus5	1	1
ApoB.EU.chr15.locus1	1	1
ApoB.EU.chr15.locus2	1	1
ApoB.EU.chr15.locus3	1	1
ApoB.EU.chr15.locus4	4	4
ApoB.EU.chr15.locus5	1	1
ApoB.EU.chr15.locus6	1	1
ApoB.EU.chr16.locus1	1	1
ApoB.EU.chr16.locus10	1	1
ApoB.EU.chr16.locus11	1	1
ApoB.EU.chr16.locus12	2	2
ApoB.EU.chr16.locus13	1	1
ApoB.EU.chr16.locus2	1	1
ApoB.EU.chr16.locus3	1	1
ApoB.EU.chr16.locus4	1	1
ApoB.EU.chr16.locus5	9	9
ApoB.EU.chr16.locus6	2	2
ApoB.EU.chr16.locus7	2	3
ApoB.EU.chr16.locus8	10	8
ApoB.EU.chr16.locus9	1	1
ApoB.EU.chr17.locus1	1	1
ApoB.EU.chr17.locus10	2	2
ApoB.EU.chr17.locus11	3	3
ApoB.EU.chr17.locus12	7	7
ApoB.EU.chr17.locus13	2	2
ApoB.EU.chr17.locus14	2	2
ApoB.EU.chr17.locus2	3	3
ApoB.EU.chr17.locus3	2	2
ApoB.EU.chr17.locus4	3	3
ApoB.EU.chr17.locus5	1	1
ApoB.EU.chr17.locus6	1	1
ApoB.EU.chr17.locus7	4	4
ApoB.EU.chr17.locus8	1	2
ApoB.EU.chr17.locus9	1	1
ApoB.EU.chr18.locus1	1	1
ApoB.EU.chr19.locus1	2	2
ApoB.EU.chr19.locus10	0	1
ApoB.EU.chr19.locus11	7	7
ApoB.EU.chr19.locus12	2	2
ApoB.EU.chr19.locus2	6	6
ApoB.EU.chr19.locus3	3	3
ApoB.EU.chr19.locus4	1	1
ApoB.EU.chr19.locus5	1	1
ApoB.EU.chr19.locus6	1	1
ApoB.EU.chr19.locus7	3	5
ApoB.EU.chr19.locus8	13	11
ApoB.EU.chr19.locus9	3	3
ApoB.EU.chr1.locus1	1	1
ApoB.EU.chr1.locus10	1	1
ApoB.EU.chr1.locus11	2	2
ApoB.EU.chr1.locus12	10	10
ApoB.EU.chr1.locus13	1	1
ApoB.EU.chr1.locus14	1	1
ApoB.EU.chr1.locus15	1	1
ApoB.EU.chr1.locus16	1	1
ApoB.EU.chr1.locus17	1	1
ApoB.EU.chr1.locus18	2	2
ApoB.EU.chr1.locus19	2	2
ApoB.EU.chr1.locus2	1	1
ApoB.EU.chr1.locus20	7	7
ApoB.EU.chr1.locus3	5	5
ApoB.EU.chr1.locus4	2	2
ApoB.EU.chr1.locus5	2	2
ApoB.EU.chr1.locus6	1	1
ApoB.EU.chr1.locus7	9	9
ApoB.EU.chr1.locus8	1	1
ApoB.EU.chr1.locus9	2	2
ApoB.EU.chr20.locus1	1	1
ApoB.EU.chr20.locus10	3	3
ApoB.EU.chr20.locus2	3	3
ApoB.EU.chr20.locus3	6	6
ApoB.EU.chr20.locus4	1	1
ApoB.EU.chr20.locus5	4	4
ApoB.EU.chr20.locus6	4	4
ApoB.EU.chr20.locus7	1	1
ApoB.EU.chr20.locus8	5	6
ApoB.EU.chr20.locus9	1	1
ApoB.EU.chr21.locus1	1	1
ApoB.EU.chr21.locus2	1	1
ApoB.EU.chr21.locus3	1	1
ApoB.EU.chr21.locus4	2	2
ApoB.EU.chr22.locus1	2	2
ApoB.EU.chr22.locus2	1	1
ApoB.EU.chr2.locus1	1	1
ApoB.EU.chr2.locus10	3	3
ApoB.EU.chr2.locus11	1	1
ApoB.EU.chr2.locus12	1	1
ApoB.EU.chr2.locus13	2	2
ApoB.EU.chr2.locus14	1	1
ApoB.EU.chr2.locus15	2	2
ApoB.EU.chr2.locus16	1	1
ApoB.EU.chr2.locus17	1	1
ApoB.EU.chr2.locus18	3	3
ApoB.EU.chr2.locus19	1	1
ApoB.EU.chr2.locus2	4	4
ApoB.EU.chr2.locus20	2	2
ApoB.EU.chr2.locus3	4	5
ApoB.EU.chr2.locus4	1	1
ApoB.EU.chr2.locus5	2	1
ApoB.EU.chr2.locus6	10	14
ApoB.EU.chr2.locus7	1	1
ApoB.EU.chr2.locus8	1	1
ApoB.EU.chr2.locus9	11	10
ApoB.EU.chr3.locus1	3	3
ApoB.EU.chr3.locus10	1	1
ApoB.EU.chr3.locus11	1	1
ApoB.EU.chr3.locus2	1	1
ApoB.EU.chr3.locus3	2	2
ApoB.EU.chr3.locus4	1	1
ApoB.EU.chr3.locus5	1	1
ApoB.EU.chr3.locus6	2	2
ApoB.EU.chr3.locus7	1	1
ApoB.EU.chr3.locus8	2	2
ApoB.EU.chr3.locus9	3	3
ApoB.EU.chr4.locus1	5	5
ApoB.EU.chr4.locus10	1	1
ApoB.EU.chr4.locus11	1	1
ApoB.EU.chr4.locus2	1	1
ApoB.EU.chr4.locus3	1	1
ApoB.EU.chr4.locus4	1	1
ApoB.EU.chr4.locus5	3	3
ApoB.EU.chr4.locus6	1	1
ApoB.EU.chr4.locus7	1	1
ApoB.EU.chr4.locus8	2	2
ApoB.EU.chr4.locus9	1	1
ApoB.EU.chr5.locus1	1	1
ApoB.EU.chr5.locus10	2	2
ApoB.EU.chr5.locus11	2	2
ApoB.EU.chr5.locus12	1	1
ApoB.EU.chr5.locus13	4	4
ApoB.EU.chr5.locus2	1	1
ApoB.EU.chr5.locus3	1	1
ApoB.EU.chr5.locus4	1	1
ApoB.EU.chr5.locus5	1	1
ApoB.EU.chr5.locus6	1	1
ApoB.EU.chr5.locus7	11	11
ApoB.EU.chr5.locus8	1	1
ApoB.EU.chr5.locus9	1	1
ApoB.EU.chr6.locus1	1	1
ApoB.EU.chr6.locus10	1	1
ApoB.EU.chr6.locus11	1	2
ApoB.EU.chr6.locus12	1	1
ApoB.EU.chr6.locus13	3	3
ApoB.EU.chr6.locus14	1	1
ApoB.EU.chr6.locus15	1	1
ApoB.EU.chr6.locus16	1	1
ApoB.EU.chr6.locus17	11	10
ApoB.EU.chr6.locus2	2	2
ApoB.EU.chr6.locus3	1	1
ApoB.EU.chr6.locus4	5	3
ApoB.EU.chr6.locus5	3	3
ApoB.EU.chr6.locus6	1	0
ApoB.EU.chr6.locus7	2	2
ApoB.EU.chr6.locus8	2	2
ApoB.EU.chr6.locus9	2	2
ApoB.EU.chr7.locus1	1	1
ApoB.EU.chr7.locus10	1	1
ApoB.EU.chr7.locus11	1	1
ApoB.EU.chr7.locus12	4	4
ApoB.EU.chr7.locus13	1	1
ApoB.EU.chr7.locus14	1	1
ApoB.EU.chr7.locus15	1	1
ApoB.EU.chr7.locus16	1	1
ApoB.EU.chr7.locus2	1	1
ApoB.EU.chr7.locus3	5	5
ApoB.EU.chr7.locus4	3	3
ApoB.EU.chr7.locus5	1	1
ApoB.EU.chr7.locus6	2	2
ApoB.EU.chr7.locus7	2	2
ApoB.EU.chr7.locus8	1	1
ApoB.EU.chr7.locus9	1	1
ApoB.EU.chr8.locus1	3	3
ApoB.EU.chr8.locus10	1	1
ApoB.EU.chr8.locus11	1	1
ApoB.EU.chr8.locus12	1	1
ApoB.EU.chr8.locus13	16	15
ApoB.EU.chr8.locus14	2	2
ApoB.EU.chr8.locus2	1	1
ApoB.EU.chr8.locus3	1	1
ApoB.EU.chr8.locus4	7	6
ApoB.EU.chr8.locus5	1	1
ApoB.EU.chr8.locus6	1	1
ApoB.EU.chr8.locus7	1	1
ApoB.EU.chr8.locus8	4	4
ApoB.EU.chr8.locus9	1	1
ApoB.EU.chr9.locus1	1	1
ApoB.EU.chr9.locus10	3	3
ApoB.EU.chr9.locus11	1	1
ApoB.EU.chr9.locus2	1	1
ApoB.EU.chr9.locus3	1	1
ApoB.EU.chr9.locus4	1	1
ApoB.EU.chr9.locus5	2	2
ApoB.EU.chr9.locus6	1	1
ApoB.EU.chr9.locus7	1	1
ApoB.EU.chr9.locus8	1	1
ApoB.EU.chr9.locus9	1	1
AscAortaDiam.EU.chr10.locus1	2	2
AscAortaDiam.EU.chr10.locus2	1	1
AscAortaDiam.EU.chr11.locus1	1	1
AscAortaDiam.EU.chr11.locus2	1	2
AscAortaDiam.EU.chr11.locus3	0	1
AscAortaDiam.EU.chr12.locus1	1	1
AscAortaDiam.EU.chr12.locus2	1	1
AscAortaDiam.EU.chr12.locus3	1	1
AscAortaDiam.EU.chr13.locus1	1	1
AscAortaDiam.EU.chr15.locus1	0	1
AscAortaDiam.EU.chr15.locus2	1	1
AscAortaDiam.EU.chr15.locus3	1	1
AscAortaDiam.EU.chr16.locus1	2	2
AscAortaDiam.EU.chr16.locus2	1	2
AscAortaDiam.EU.chr16.locus3	0	1
AscAortaDiam.EU.chr16.locus4	1	2
AscAortaDiam.EU.chr17.locus1	1	1
AscAortaDiam.EU.chr17.locus2	0	1
AscAortaDiam.EU.chr17.locus3	0	2
AscAortaDiam.EU.chr17.locus4	1	1
AscAortaDiam.EU.chr22.locus1	1	1
AscAortaDiam.EU.chr2.locus1	1	2
AscAortaDiam.EU.chr2.locus2	1	1
AscAortaDiam.EU.chr3.locus1	1	1
AscAortaDiam.EU.chr3.locus2	1	1
AscAortaDiam.EU.chr3.locus3	1	1
AscAortaDiam.EU.chr3.locus4	1	1
AscAortaDiam.EU.chr3.locus5	1	2
AscAortaDiam.EU.chr3.locus6	1	1
AscAortaDiam.EU.chr4.locus1	1	1
AscAortaDiam.EU.chr5.locus1	1	1
AscAortaDiam.EU.chr5.locus2	2	3
AscAortaDiam.EU.chr5.locus3	2	4
AscAortaDiam.EU.chr5.locus4	1	1
AscAortaDiam.EU.chr6.locus1	1	1
AscAortaDiam.EU.chr6.locus2	1	1
AscAortaDiam.EU.chr6.locus3	1	1
AscAortaDiam.EU.chr7.locus1	2	2
AscAortaDiam.EU.chr7.locus2	3	4
AscAortaDiam.EU.chr7.locus3	1	1
AscAortaDiam.EU.chr8.locus1	1	1
AscAortaDiam.EU.chr8.locus2	0	1
AscAortaDiam.EU.chr8.locus3	1	2
AscAortaDiam.EU.chr8.locus4	0	1
AscAortaDiam.EU.chr8.locus5	1	1
AscAortaDiam.EU.chr8.locus6	1	2
AscAortaDiam.EU.chr8.locus7	1	1
AscAortaDiam.EU.chr8.locus8	1	1
AscAortaDiam.EU.chr9.locus1	1	1
AST.EU.chr10.locus1	9	14
AST.EU.chr10.locus10	0	1
AST.EU.chr10.locus11	2	2
AST.EU.chr10.locus12	2	2
AST.EU.chr10.locus2	2	3
AST.EU.chr10.locus3	1	1
AST.EU.chr10.locus4	0	1
AST.EU.chr10.locus5	2	2
AST.EU.chr10.locus6	2	2
AST.EU.chr10.locus7	1	1
AST.EU.chr10.locus8	7	7
AST.EU.chr10.locus9	8	9
AST.EU.chr11.locus1	1	1
AST.EU.chr11.locus10	1	1
AST.EU.chr11.locus11	1	1
AST.EU.chr11.locus12	2	1
AST.EU.chr11.locus13	0	1
AST.EU.chr11.locus14	1	1
AST.EU.chr11.locus15	3	3
AST.EU.chr11.locus16	1	1
AST.EU.chr11.locus17	1	1
AST.EU.chr11.locus18	1	1
AST.EU.chr11.locus19	1	1
AST.EU.chr11.locus2	1	2
AST.EU.chr11.locus20	2	2
AST.EU.chr11.locus21	1	1
AST.EU.chr11.locus3	2	2
AST.EU.chr11.locus4	1	0
AST.EU.chr11.locus5	3	3
AST.EU.chr11.locus6	0	2
AST.EU.chr11.locus7	1	0
AST.EU.chr11.locus8	1	1
AST.EU.chr11.locus9	1	0
AST.EU.chr12.locus1	1	2
AST.EU.chr12.locus10	1	1
AST.EU.chr12.locus11	1	1
AST.EU.chr12.locus12	2	2
AST.EU.chr12.locus13	1	2
AST.EU.chr12.locus14	0	1
AST.EU.chr12.locus15	1	1
AST.EU.chr12.locus16	1	1
AST.EU.chr12.locus2	1	1
AST.EU.chr12.locus3	2	2
AST.EU.chr12.locus4	1	1
AST.EU.chr12.locus5	2	2
AST.EU.chr12.locus6	4	3
AST.EU.chr12.locus7	0	1
AST.EU.chr12.locus8	2	2
AST.EU.chr12.locus9	1	1
AST.EU.chr13.locus1	1	1
AST.EU.chr13.locus2	1	1
AST.EU.chr13.locus3	2	2
AST.EU.chr13.locus4	1	1
AST.EU.chr14.locus1	1	1
AST.EU.chr14.locus2	2	3
AST.EU.chr14.locus3	2	3
AST.EU.chr14.locus4	1	1
AST.EU.chr14.locus5	1	1
AST.EU.chr14.locus6	2	5
AST.EU.chr14.locus7	1	0
AST.EU.chr14.locus8	1	1
AST.EU.chr15.locus1	2	2
AST.EU.chr15.locus2	0	1
AST.EU.chr15.locus3	3	2
[truncated: 26,374 more rows]

## Sheet: Table S4b
Trait	Number of independent signals produced by the largest GWAS	Number of independent signals ratio (overlap-corrected GWAS / largest GWAS)	Number of independent signals difference (overlap-corrected GWAS - largest GWAS)	Ancestry	Largest GWAS sample size	Overlap-corrected GWAS sample size	Sample size difference (overlap-corrected GWAS / largest GWAS)	Sample size ratio (overlap-corrected GWAS / largest GWAS)	Number of shared association regions	Number of shared association regions with different numbers of independent signals	Number of shared association regions with more independent signals produced by the overlap-corrected GWAS	Number of shared association regions with more independent signals produced by the largest GWAS	Average number of additional independent signals produced by the overlap-corrected GWAS	Average number of additional independent signals produced by the largest GWAS	Proportion of shared association regions with different numbers of independent signals
PlatVol	1192	1.41107	490	EU	460935	1.01997e+06	559033	2.21282	417	293	264	29	2.1553	-2.72414	0.702638
PlatCount	1304	1.32209	420	EU	542827	1273109	730282	2.34533	519	298	267	31	1.76404	-1.64516	0.574181
Ap-LM	1381	1.27154	375	EU	450243	554289	104046	1.23109	650	291	275	16	1.47273	-1.875	0.447692
MeanSpheredVol	754	1.47745	360	EU	438558	597643	159085	1.36275	345	225	214	11	1.82243	-2.72727	0.652174
HEIGHT	2243	1.15782	354	EU	1597374	3.78404e+06	2186660	2.36891	653	413	292	121	1.85274	-1.54545	0.632466
BMI	473	1.65116	308	EU	795640	4.64041e+06	3844770	5.83229	361	195	186	9	1.70968	-1.11111	0.540166
WBC	838	1.36277	304	EU	562243	927757	365514	1.6501	437	216	204	12	1.60294	-1.91667	0.494279
MeanCorpVol	1227	1.22005	270	EU	544127	974027	429900	1.79007	461	240	206	34	1.78155	-2.85294	0.520607
RedCount	986	1.27282	269	EU	545203	1.43311e+06	887910	2.62859	449	222	196	26	1.66837	-2.23077	0.494432
PlatCrit	981	1.26504	260	EU	445857	535610	89753.4	1.20131	458	211	194	17	1.47938	-1.58824	0.460699
RBCDistWidth	865	1.30058	260	EU	531774	1445011	913237	2.71734	363	198	170	28	1.91176	-2.32143	0.545455
EosinCount	833	1.29412	245	EU	474237	898054	423817	1.89368	368	185	165	20	1.73333	-2.05	0.502717
MeanCorpHb	1044	1.2318	242	EU	486823	936996	450173	1.92472	403	221	195	26	1.66667	-3.19231	0.548387
SHBGadjBMI	732	1.31557	231	EU	368929	454381	85452.3	1.23162	345	160	154	6	1.55844	-1.5	0.463768
MeanReticuloVol	809	1.27936	226	EU	438557	553869	115312	1.26293	348	182	171	11	1.53801	-3.36364	0.522989
SHBG	491	1.45214	222	EU	397367	489967	92600.4	1.23303	261	148	142	6	1.61268	-1.16667	0.56705
ReticuloPerc	657	1.31507	207	EU	438557	571378	132821	1.30286	293	152	141	11	1.60284	-1.72727	0.518771
NeutCount	634	1.32334	205	EU	519288	1274938	755650	2.45517	333	151	141	10	1.60993	-2.2	0.453453
MonoCount	1023	1.19941	204	EU	521594	1.11213e+06	590535	2.13217	412	208	176	32	1.59091	-2.375	0.504854
HighScatReticuloCount	704	1.28551	201	EU	438557	580496	141939	1.32365	321	170	151	19	1.61589	-2.26316	0.529595
HbConc	677	1.28065	190	EU	563946	998025	434079	1.76972	357	164	148	16	1.52027	-2.1875	0.459384
GGT	614	1.30945	190	EU	437980	543250	105270	1.24035	304	129	122	7	1.68033	-2.14286	0.424342
HighScatReticuloPerc	743	1.24092	179	EU	438558	574745	136187	1.31053	320	171	151	20	1.56291	-2.85	0.534375
ReticuloCount	656	1.25762	169	EU	438557	578264	139707	1.31856	298	155	137	18	1.53285	-2.27778	0.520134
HBA1C	687	1.23581	162	EU	438069	1.39423e+06	956157	3.18266	332	127	114	13	1.60526	-1.61538	0.38253
PlatDistWidth	934	1.16809	157	EU	445856	526988	81132.2	1.18197	381	152	130	22	1.56154	-2.09091	0.39895
MonoPerc	711	1.218	155	EU	445069	522733	77663.8	1.1745	325	140	128	12	1.4375	-2.41667	0.430769
LDL	615	1.2374	146	EU	1231289	2.76483e+06	1533550	2.24548	247	142	116	26	1.93103	-3	0.574899
SBP	455	1.30989	141	EU	745787	2.99428e+06	2248490	4.01492	286	124	112	12	1.375	-1.08333	0.433566
ImReticuloFrac	456	1.30702	140	EU	438557	558860	120303	1.27431	216	95	88	7	1.72727	-1.71429	0.439815
EosinPerc	805	1.16646	134	EU	445069	497488	52419.1	1.11778	339	144	123	21	1.5122	-2.47619	0.424779
NeutroPerc	473	1.2537	120	EU	445069	493187	48118.4	1.10811	274	105	99	6	1.36364	-2.5	0.383212
Hematocrit	684	1.17398	119	EU	562259	577873	15613.6	1.02777	352	122	107	15	1.31776	-1.46667	0.346591
DBP	428	1.26168	112	EU	757569	3301228	2543659	4.35766	253	109	91	18	1.46154	-1.16667	0.43083
WHRadjBMI	410	1.26829	110	EU	694649	2.33707e+06	1642420	3.36439	247	92	85	7	1.4	-1.28571	0.37247
ALP	715	1.15105	108	EU	438226	529154	90928	1.20749	301	156	119	37	1.64706	-2.37838	0.518272
LymphoPerc	535	1.19065	102	EU	445069	494752	49683.2	1.11163	305	91	83	8	1.46988	-2.5	0.298361
HDL	649	1.14946	97	EU	1244580	2.33391e+06	1089330	1.87526	295	136	102	34	1.7451	-2.38235	0.461017
TG	712	1.12781	91	EU	1253277	2.33793e+06	1084650	1.86545	315	144	108	36	1.59259	-2.25	0.457143
LymphoCount	281	1.29537	83	EU	524923	1273042	748119	2.4252	140	65	60	5	1.65	-3.2	0.464286
eBMD	988	1.06984	69	EU	426824	492996	66172	1.15503	381	118	85	33	1.34118	-1.36364	0.309711
FEV1toFVC	321	1.19938	64	EU	404128	791038	386910	1.95739	220	59	56	3	1.19643	-1	0.268182
Testosterone_total	179	1.3352	60	EU	425097	584999	159902	1.37615	122	50	49	1	1.2449	-1	0.409836
Ca	299	1.19064	57	EU	401109	442378	41269.3	1.10289	174	45	43	2	1.4186	-2	0.258621
AST	400	1.1425	57	EU	436605	490334	53729	1.12306	231	52	45	7	1.42222	-1	0.225108
BILIRUBIN	262	1.20992	55	EU	436388	503160	66771.7	1.15301	158	34	28	6	2.35714	-1.83333	0.21519
BS	104	1.51923	54	EU	367427	739993	372566	2.01399	67	27	27	0	2		0.402985
BasoCount	200	1.255	51	EU	474001	990981	516980	2.09067	121	40	34	6	1.88235	-2.16667	0.330579
ALT	274	1.18613	51	EU	438049	523607	85557.6	1.19532	171	59	48	11	1.41667	-1.54545	0.345029
MeanCorpHbConc	322	1.15528	50	EU	491553	936087	444534	1.90435	146	63	51	12	1.52941	-2.33333	0.431507
T2D	145	1.33793	49	EU	293100	1.11863e+06	825530	3.81654	94	39	37	2	1.45946	-2.5	0.414894
WHR	262	1.17939	47	EU	697734	2.37287e+06	1675140	3.40082	179	51	41	10	1.39024	-1	0.284916
FEV1	229	1.19214	44	EU	404165	748032	343867	1.85081	168	39	39	0	1.12821		0.232143
Urate	481	1.08316	40	EU	437683	750997	313314	1.71585	254	63	51	12	1.11765	-1.41667	0.248031
FVC	179	1.21229	38	EU	403912	776992	373080	1.92367	142	31	31	0	1.22581		0.21831
PEF	174	1.20115	35	EU	345265	376953	31688.1	1.09178	136	29	29	0	1.2069		0.213235
CRP	230	1.12174	28	EU	437260	687580	250320	1.57247	125	43	32	11	1.25	-1.09091	0.344
CD	37	1.75676	28	EU	60870	106153	45282.8	1.74393	27	13	13	0	2.15385		0.481481
eGFRcrea	26	1.96154	25	EU	133413	750257	616844	5.62357	23	14	14	0	1.78571		0.608696
BasoPerc	139	1.17986	25	EU	445069	496130	51061.1	1.11473	87	27	25	2	1.36	-4.5	0.310345
CAD	168	1.13095	22	EU	613027	864960	251933	1.41096	112	30	26	4	1.19231	-2.25	0.267857
RhA	5	5.4	22	EU	19913.9	102023	82109.1	5.1232	4	3	3	0	7.33333		0.75
VitD	135	1.15556	21	EU	485762	588451	102689	1.2114	66	21	18	3	1.66667	-3	0.318182
Testosterone_bioavailable	80	1.2625	21	EU	382988	512745	129757	1.3388	68	19	19	0	1.10526		0.279412
SeropositiveRhA	20	2	20	EU	32098.2	86606.8	54508.6	2.69818	11	5	5	0	4		0.454545
IBD	51	1.37255	19	EU	95324	101267	5942.74	1.06234	40	15	15	0	1.26667		0.375
T1D	94	1.19149	18	EU	73011.1	126571	53559.7	1.73358	46	21	17	4	1.70588	-2.75	0.456522
POAG	24	1.625	15	EU	64507.8	144836	80328.2	2.24525	19	10	9	1	1.77778	-1	0.526316
HYPERTENSION	196	1.07653	15	EU	396293	478059	81766.1	1.20633	144	25	19	6	1.10526	-1	0.173611
Asthma_ChildhoodOnset	43	1.34884	15	EU	37655.4	56632.6	18977.2	1.50397	25	7	7	0	2.14286		0.28
T2DadjBMI	122	1.12295	15	EU	157390	334423	177033	2.1248	82	13	13	0	1.15385		0.158537
MI	59	1.23729	14	EU	222348	307000	84651.3	1.38071	44	12	11	1	1.36364	-1	0.272727
SerumUrea	259	1.04633	12	EU	437908	452161	14253.5	1.03255	161	12	11	1	1.18182	-1	0.0745342
Creatinine	604	1.01821	11	EU	437987	484689	46702.3	1.10663	306	34	21	13	1.14286	-1	0.111111
AscAortaDiam	49	1.22449	11	EU	41135	41135	0	1	42	10	10	0	1.1		0.238095
PulsePress	421	1.02613	11	EU	745787	2.11803e+06	1372240	2.83999	282	40	24	16	1.125	-1	0.141844
HIPCadjBMI	31	1.32258	10	EU	211117	563328	352211	2.66832	26	9	9	0	1.11111		0.346154
eGFRcreaNoDiabetes	564	1.01773	10	EU	1109050	1203998	94948	1.08561	309	28	19	9	1.05263	-1.11111	0.0906149
BMIadjSMK	26	1.34615	9	EU	210235	291230	80995.3	1.38526	24	7	7	0	1.28571		0.291667
Eczema	22	1.36364	8	EU	46060.5	91372.6	45312.2	1.98375	17	5	4	1	2.25	-1	0.294118
FBW	83	1.09639	8	EU	298142	345993	47851	1.1605	67	17	12	5	1.08333	-1	0.253731
LateAD	12	1.66667	8	EU	57692.5	62915.3	5222.79	1.09053	8	2	2	0	4		0.25
Parkinsons	12	1.58333	7	EU	31325	190833	159508	6.09203	10	6	5	1	1.6	-1	0.6
Asthma	10	1.7	7	EU	444537	1.15454e+06	710006	2.59718	9	4	4	0	1.75		0.444444
FG	38	1.18421	7	EU	151188	455324	304136	3.01164	26	5	5	0	1.4		0.192308
UC	16	1.375	6	EU	58715	61148.4	2433.42	1.04144	16	4	4	0	1.5		0.25
Asthma_AdultOnset	10	1.6	6	EU	83806.6	110380	26573	1.31708	8	4	4	0	1.5		0.5
Allergy	50	1.1	5	EU	360837	360837	0	1	37	5	5	0	1		0.135135
PI	35	1.14286	5	EU	45861	48969	3108	1.06777	17	4	4	0	1.25		0.235294
WAISTadjBMI	20	1.25	5	EU	231355	604786	373431	2.6141	18	3	3	0	1.66667		0.166667
MultipleSclerosis	7	1.57143	4	EU	24739.6	61321	36581.4	2.47866	7	3	3	0	1.33333		0.428571
LVESV	17	1.23529	4	EU	41135	54599	13464	1.32731	15	3	3	0	1.33333		0.2
HIPC	19	1.21053	4	EU	213038	456576	243538	2.14317	18	3	3	0	1.33333		0.166667
WCadjBMISMK	17	1.23529	4	EU	183591	308084	124493	1.6781	17	4	4	0	1		0.235294
UACR	33	1.12121	4	EU	547361	1258405	711044	2.29904	27	9	6	3	1.16667	-1	0.333333
ALS	4	1.75	3	EU	80713	112863	32150.1	1.39833	3	1	1	0	3		0.333333
LSBMD	16	1.1875	3	EU	44731	59044.6	14313.6	1.31999	15	3	3	0	1		0.2
FGadjBMI	87	1.03448	3	EU	200622	283816	83193.9	1.41468	42	5	4	1	1	-1	0.119048
AD	37	1.08108	3	EU	283145	757279	474134	2.67452	23	6	4	2	1.25	-1	0.26087
Cirrhosis	3	2	3	EU	1494.62	29952.2	28457.6	20.04	3	2	2	0	1.5		0.666667
NAFLD	4	1.75	3	EU	33370.6	61353.8	27983.3	1.83856	3	2	2	0	1.5		0.666667
T2D_add	71	1.04225	3	EU	118506	121793	3287.17	1.02774	49	3	3	0	1		0.0612245
WHRadjBMISMK	13	1.15385	2	EU	167499	236717	69218.1	1.41324	12	2	2	0	1		0.166667
RNFL	21	1.09524	2	EU	38485	53000.4	14515.4	1.37717	19	2	2	0	1		0.105263
LVEDV	10	1.2	2	EU	41135	51115.4	9980.43	1.24263	8	1	1	0	2		0.125
Snoring	14	1.14286	2	EU	381973	447011	65037.9	1.17027	14	2	2	0	1		0.142857
CKD	1	3	2	EU	44303.3	173450	129147	3.91506	1	1	1	0	2		1
SleepInsomnia	7	1.28571	2	EU	236965	630415	393450	2.66037	6	3	2	1	1.5	-1	0.5
FNBMD	11	1.18182	2	EU	49988	68137.7	18149.7	1.36308	10	2	2	0	1		0.2
FIadjBMI	23	1.04348	1	EU	151013	237820	86807.5	1.57483	16	1	1	0	1		0.0625
Estradiol	17	1.05882	1	EU	206927	367808	160881	1.77748	11	1	1	0	1		0.0909091
Stroke_ischemic	12	1.08333	1	EU	236506	732887	496382	3.09881	12	1	1	0	1		0.0833333
SVI	3	1.33333	1	EU	41135	49511.3	8376.28	1.20363	3	1	1	0	1		0.333333
LVEDVI	6	1.16667	1	EU	41135	46588.6	5453.6	1.13258	4	1	1	0	1		0.25
LVEF	12	1.08333	1	EU	41135	62681	21546	1.52379	12	1	1	0	1		0.0833333
LVESVI	14	1.07143	1	EU	41135	50120.9	8985.89	1.21845	12	1	1	0	1		0.0833333
BackPain	5	1.2	1	EU	351925	352165	240.17	1.00068	5	1	1	0	1		0.2
AF	77	1.01299	1	EU	197847	219622	21774.4	1.11006	56	5	3	2	1	-1	0.0892857
VaricoseVeins	29	1.03448	1	EU	62507.2	94154.3	31647.1	1.5063	21	1	1	0	1		0.047619
toastLAA	3	1	0	EU	204991	204991	0	1	3	0	0	0			0
2hrG	5	1	0	EU	15234	28730	13496	1.88591	5	0	0	0			0
AFR	11	1	0	EU	116138	137109	20970.8	1.18057	10	0	0	0			0
ALLOA	8	1	0	EU	256039	316613	60574.2	1.23658	8	0	0	0			0
allDKD	1	1	0	EU	4759.87	25411.9	20652	5.33877	1	0	0	0			0
BarretsEsophagus	2	1	0	EU	40783.5	41469.5	686.023	1.01682	2	0	0	0			0
CADinT1D	1	1	0	EU	3036.56	4516.64	1480.08	1.48742	1	0	0	0			0
TFR	18	1	0	EU	116138	136967	20828.9	1.17935	18	0	0	0			0
BIP	4	1	0	EU	23291.1	46988.9	23697.9	2.01747	4	0	0	0			0
PVD	2	1	0	EU	15897	16853.2	956.19	1.06015	2	0	0	0			0
ParentalLongevity_AtDeath	4	1	0	EU	208118	216469	8351.48	1.04013	3	0	0	0			0
KNEEOA	5	1	0	EU	93640	97851.5	4211.49	1.04498	5	0	0	0			0
LFR	11	1	0	EU	116138	137367	21229.1	1.18279	11	0	0	0			0
Hemorrhoids	1	1	0	EU	30630	32326.2	1696.18	1.05538	1	0	0	0			0
HerniaAbdomin	3	1	0	EU	22368	25490.7	3122.65	1.1396	3	0	0	0			0
IBS	1	1	0	EU	190159	200675	10515.9	1.0553	1	0	0	0			0
IPF	4	1	0	EU	24863.8	39314.4	14450.6	1.58119	3	0	0	0			0
PaternalLongevity_AtDeath	4	1	0	EU	317652	331954	14301.9	1.04502	4	0	0	0			0
RA	2	1	0	EU	10389	12770.4	2381.38	1.22922	2	0	0	0			0
HIPOA	13	1	0	EU	60311	62837.2	2526.17	1.04189	13	0	0	0			0
HOMAB	2	1	0	EU	46186	50463.9	4277.93	1.09262	2	0	0	0			0
HR	330	1	0	EU	458969	477113	18143.6	1.03953	195	16	8	8	1	-1	0.0820513
HBA1CadjBMI	75	1	0	EU	146806	153999	7193	1.049	47	0	0	0			0
HCC	1	1	0	EU	2599.73	19394.1	16794.4	7.46004	1	0	0	0			0
HF	7	1	0	EU	199181	343994	144813	1.72704	7	0	0	0			0
EtOH	1	1	0	EU	18213	30982	12769	1.70109	1	0	0	0			0
Dyslipid	23	1	0	EU	56375	59108.3	2733.28	1.04848	14	0	0	0			0
ESRDvControl_T1D	1	1	0	EU	7408	7976.07	568.07	1.07668	1	0	0	0			0
ESRDvNonESRD_DM	1	1	0	EU	9716.39	17514.4	7798	1.80256	1	0	0	0			0
ESRDvNonESRD_T1D	1	1	0	EU	7762	8580.94	818.94	1.10551	1	0	0	0			0
SVL	3	1	0	EU	41135	49231.6	8096.6	1.19683	3	0	0	0			0
SmokingFGmain	2	1	0	EU	54731	100824	46093	1.84217	2	0	0	0			0
Cancer	6	1	0	EU	47797	48892.8	1095.82	1.02293	5	0	0	0			0
CreatinineUrinary	1	1	0	EU	7119	22179	15060	3.11547	1	0	0	0			0
DiabeticNephro	1	1	0	EU	3854	5017.91	1163.91	1.302	1	0	0	0			0
DiabeticRetino	3	1	0	EU	6018	8391.66	2373.66	1.39443	3	0	0	0			0
Stroke	12	1	0	EU	278025	630996	352971	2.26957	12	0	0	0			0
Stroke_hemorrhagic	1	1	0	EU	38850.8	40387.3	1536.51	1.03955	1	0	0	0			0
Stroke_lobar	1	1	0	EU	514	1037.71	523.71	2.01889	1	0	0	0			0
T2D_rec	8	1	0	EU	118506	123752	5246.25	1.04427	7	0	0	0			0
CKD_DM	2	1	0	EU	21646	42958	21312	1.98457	2	0	0	0			0
CKD_T1D	2	1	0	EU	13253	14564.4	1311.43	1.09895	2	0	0	0			0
CKDpDKD_T1D	1	1	0	EU	14039	14886	847	1.06033	1	0	0	0			0
AllergicRhinitis	1	1	0	EU	42027	43371	1344.04	1.03198	1	0	0	0			0
lateDKD_T1D	1	1	0	EU	9298	11274.9	1976.85	1.21261	1	0	0	0			0
toastCE	3	1	0	EU	322150	319199	-2951	0.99084	3	0	0	0			0
eGFRcreaInDiabetes	15	1	0	EU	135277	144999	9722	1.07187	11	0	0	0			0
Neuroticism	22	1	0	EU	329821	385501	55679.7	1.16882	21	2	1	1	1	-1	0.0952381
MA_DM	3	1	0	EU	14573.2	24483.2	9910	1.68001	3	0	0	0			0
MA_T1D	4	1	0	EU	8142	9292.28	1150.28	1.14128	4	0	0	0			0
MBW	33	1	0	EU	210267	296641	86374	1.41078	29	2	1	1	1	-1	0.0689655
MDD	3	1	0	EU	294578	496766	202189	1.68637	3	0	0	0			0
LowGripEWGSOP	5	1	0	EU	157560	175244	17683.8	1.11224	5	0	0	0			0
LowGripFNIH	2	1	0	EU	157560	171978	14418.5	1.09151	2	0	0	0			0
Osteoporosis	4	1	0	EU	19537	20229.2	692.19	1.03543	4	0	0	0			0
WAIST	13	0.923077	-1	EU	232101	1.24084e+06	1008740	5.34611	10	5	2	3	1	-1	0.5
Intelligence	17	0.941176	-1	EU	269867	348175	78308	1.29017	16	1	0	1		-1	0.0625
nonHDL	613	0.996737	-2	EU	926571	1013999	87428	1.09436	267	29	14	15	1.71429	-1.73333	0.108614
BUN	45	0.955556	-2	EU	243031	252849	9818	1.0404	34	2	0	2		-1	0.0588235
DirectBilirubin	193	0.989637	-2	EU	372739	452072	79332.8	1.21284	93	22	13	9	1.23077	-2	0.236559
ApoB	539	0.996289	-2	EU	436068	447144	11075.7	1.0254	243	16	7	9	1.57143	-1.44444	0.0658436
SleepDuration	35	0.885714	-4	EU	446228	521080	74851.7	1.16774	24	3	2	1	1	-6	0.125
AMD	40	0.85	-6	EU	29621.8	44214.8	14592.9	1.49264	7	4	1	3	4	-3.33333	0.571429
TB-LM	1253	0.994413	-7	EU	155961	217572	61611.1	1.39504	349	159	81	78	1.81481	-1.97436	0.455587
CHOL	850	0.982353	-15	EU	1320016	2.11269e+06	792673	1.6005	324	137	77	60	1.71429	-2.45	0.42284
BFP	62	0.758065	-15	EU	155961	207423	51461.7	1.32997	25	13	2	11	1	-1.54545	0.52
Alb	249	0.927711	-18	EU	401257	415719	14461.9	1.03604	136	29	7	22	1.42857	-1.27273	0.213235
WEIGHT	602	0.935216	-39	EU	458243	487801	29557.6	1.0645	392	57	15	42	1	-1.28571	0.145408
IGF1	680	0.898529	-69	EU	435841	443966	8125.02	1.01864	301	108	25	83	1.4	-1.25301	0.358804

## Sheet: Table S5a
Ancestry	Trait											Trait heritability (basic LDSC) results using the overlap-corrected GWAS summary statistics
		obs_h2_largest	obs_h2_se_largest	lambda_gc_largest	mean_chi_sq_largest	intercept_largest	intercept_se_largest	ratio_largest	ratio_se_largest	z_score_largest	pValue_largest	num_snps_BL	obs_h2_BL	obs_h2_se_BL	lambda_gc_BL	mean_chi_sq_BL	intercept_BL	intercept_se_BL	ratio_BL	ratio_se_BL	z_score_BL	pValue_BL
AA	HBA1C	0.1496	0.0814	1.0016	1.0082	0.9966	0.0068	-1		1.83784	0.0660863	1011325	0.15	0.0801	1.0016	1.0081	0.9964	0.0068	-1		1.87266	0.0611155
AA	HEIGHT	0.4439	0.0467	1.6448	1.9285	1.4747	0.0548	0.5112	0.059	9.50535	1.9937e-21	984448	0.2028	0.0236	1.5144	1.7439	1.3531	0.0457	0.4746	0.0614	8.59322	8.45652e-18
AA	SmokingFGmain	-0.1384	1.0105	1.0046	1.0088	1.0364	0.043	4.1493	4.8973	-0.136962	0.891061	17349	0.397	0.3974	0.9986	1.0079	0.9989	0.0345	-1		0.998993	0.317798
AA	SmokingT2Dmain	-0.1278	0.7955	1.0345	1.0095	1.0202	0.0314	2.115	3.2862	-0.160654	0.872366	17153	-0.0038	0.3823	1.0345	1.0261	1.0386	0.0297	1.4783	1.1371	-0.00993984	0.992069
AA	Stroke	0.1304	0.0556	1.0618	1.0558	1.0379	0.0065	0.6785	0.1157	2.34532	0.0190106	993716	0.0554	0.0307	1.0588	1.0564	1.0412	0.0069	0.7312	0.1222	1.80456	0.0711435
AA	T2D	0.064	0.0293	1.0075	1.007	0.9928	0.0077	-1		2.1843	0.0289402	957640	0.063	0.029	1.0046	1.0065	0.9925	0.0078	-1		2.17241	0.0298245
AA	YouthT2D	-0.5797	0.3485	1.0075	1.0085	1.0222	0.0072	2.6176	0.851	-1.66341	0.0962295	856592	-0.5281	0.2293	1.0075	1.0069	1.0248	0.0068	3.5697	0.9848	-2.3031	0.0212734
AF	CHOL	0.1612	0.0324	1.1523	1.2742	1.1113	0.0247	0.4059	0.09	4.97531	6.51438e-07	1070127	0.1616	0.0324	1.1523	1.2736	1.1105	0.0246	0.4039	0.0899	4.98765	6.11168e-07
AF	HDL	0.1527	0.029	1.1333	1.2299	1.0795	0.0238	0.346	0.1034	5.26552	1.39795e-07	1070129	0.1524	0.0288	1.1333	1.2296	1.0795	0.0237	0.3462	0.1032	5.29167	1.21207e-07
AF	LDL	0.1428	0.0309	1.1333	1.2204	1.0836	0.0215	0.3794	0.0976	4.62136	3.81234e-06	1070135	0.1429	0.0309	1.127	1.2199	1.0832	0.0214	0.3786	0.0975	4.6246	3.7533e-06
AF	nonHDL	0.1068	0.0317	1.0375	1.0574	1.0246	0.0085	0.4293	0.148	3.36909	0.000754181	1063848	0.1091	0.0314	1.0375	1.0567	1.0234	0.0084	0.4123	0.1478	3.47452	0.000511764
AF	Stroke_ischemic	0.009	0.1451	1.0016	1.0054	1.0049	0.007	0.9067	1.3021	0.0620262	0.950542	973731	0.1213	0.0688	1.0075	1.0067	0.9946	0.0061	-1		1.76308	0.0778868
AF	TG	0.1039	0.0207	1.1683	1.2254	1.1221	0.0209	0.542	0.093	5.01932	5.18537e-07	1070131	0.1041	0.0206	1.1683	1.2257	1.1221	0.0209	0.541	0.0925	5.0534	4.34018e-07
EA	ALT	0.0582	0.006	1.2267	1.3918	1.0649	0.011	0.1656	0.028	9.7	3.01499e-22	955292	0.0349	0.0038	1.2038	1.3489	1.07	0.0105	0.2007	0.0302	9.18421	4.14557e-20
EA	AST	0.0569	0.006	1.2234	1.3862	1.0625	0.0107	0.1619	0.0278	9.48333	2.46287e-21	955304	0.0356	0.0039	1.2103	1.3524	1.0664	0.0103	0.1884	0.0294	9.12821	6.96443e-20
EA	Asthma	0.1099	0.0121	1.1082	1.1618	1.0094	0.0084	0.0582	0.052	9.08264	1.05968e-19	938230	0.0772	0.0093	1.1082	1.1601	1.012	0.009	0.0747	0.0562	8.30108	1.03173e-16
EA	BMI	0.1652	0.0086	1.4602	1.6325	1.1183	0.0134	0.187	0.0211	19.2093	3.09396e-82	843578	0.0572	0.0032	1.5035	1.6867	1.1392	0.0144	0.2027	0.021	17.875	1.84675e-71
EA	CAD	0.1492	0.0166	1.2267	1.3378	1.0829	0.0104	0.2454	0.0307	8.98795	2.5188e-19	951282	0.1197	0.0126	1.2103	1.33	1.0402	0.0103	0.1218	0.0313	9.5	2.0989e-21
EA	CHOL	0.0771	0.0071	1.2464	1.516	1.0829	0.0122	0.1607	0.0236	10.8592	1.80411e-27	856382	0.0435	0.0044	1.2531	1.5588	1.0975	0.0137	0.1744	0.0245	9.88636	4.77042e-23
EA	Creatinine	0.1027	0.0084	1.2631	1.3983	1.1036	0.0115	0.2601	0.0289	12.2262	2.25257e-34	932066	0.1028	0.0084	1.2631	1.3984	1.1032	0.0114	0.2592	0.0287	12.2381	1.94545e-34
EA	DBP	0.0554	0.0061	1.1683	1.2179	1.0632	0.0103	0.2898	0.0471	9.08197	1.0663e-19	932074	0.0556	0.0061	1.1683	1.2177	1.0624	0.0103	0.2869	0.0472	9.11475	7.88491e-20
EA	eGFRcrea	0.0977	0.0082	1.2798	1.4035	1.1191	0.012	0.2952	0.0298	11.9146	9.93011e-33	932367	0.0982	0.0082	1.2798	1.4037	1.1175	0.012	0.2912	0.0298	11.9756	4.76918e-33
EA	FGadjBMI	0.0427	0.0165	1.0165	1.041	1.0151	0.008	0.3671	0.1948	2.58788	0.0096569	908899	0.0521	0.0137	1.0075	1.0318	0.992	0.0084	-1		3.80292	0.000143001
EA	FG	0.0455	0.004	1.194	1.3115	1.0663	0.0106	0.2127	0.0342	11.375	5.57029e-30	954165	0.0454	0.004	1.194	1.312	1.0661	0.0107	0.2117	0.0344	11.35	7.41627e-30
EA	FIadjBMI	0.0298	0.0152	1.0165	1.0147	0.9985	0.0066	-1		1.96053	0.0499343	903217	0.0456	0.0118	0.9957	1.0209	0.9907	0.0067	-1		3.86441	0.00011136
EA	FI	-0.707	1.5027	1.0105	1.0116	1.0156	0.0079	1.3491	0.6847	-0.470486	0.638008	458994	-0.0426	0.181	0.9927	0.9966	0.9991	0.0072			-0.235359	0.81393
EA	GGT	0.097	0.014	1.2631	1.5952	1.068	0.0115	0.1142	0.0194	6.92857	4.25112e-12	954978	0.0628	0.0096	1.2431	1.5433	1.0772	0.0113	0.1422	0.0209	6.54167	6.0837e-11
EA	HBA1CadjBMI	0.1173	0.0185	1.0345	1.0661	0.9911	0.0077	-1		6.34054	2.2896e-10	910556	0.1166	0.0151	1.0345	1.083	0.9934	0.0079	-1		7.72185	1.14649e-14
EA	HBA1C	0.0452	0.0051	1.1683	1.3197	1.0679	0.01	0.2124	0.0313	8.86275	7.80679e-19	954452	0.0363	0.0041	1.1523	1.2937	1.0524	0.0101	0.1784	0.0343	8.85366	8.46962e-19
EA	HDL	0.117	0.0159	1.3135	1.6988	1.1131	0.0152	0.1619	0.0217	7.35849	1.86001e-13	863382	0.0781	0.0115	1.3272	1.7806	1.1376	0.0162	0.1762	0.0207	6.7913	1.11124e-11
EA	HEIGHT	0.2629	0.0138	1.6792	2.5556	1.2784	0.0229	0.1789	0.0147	19.0507	6.4799e-81	925370	0.2615	0.0137	1.6754	2.548	1.2756	0.0228	0.178	0.0147	19.0876	3.20197e-81
EA	LDL	0.0658	0.0073	1.1908	1.4445	1.0611	0.0119	0.1375	0.0269	9.0137	1.99222e-19	864168	0.0495	0.006	1.2136	1.526	1.0786	0.013	0.1494	0.0248	8.25	1.58395e-16
EA	nonHDL	0.1119	0.0146	1.1459	1.2694	1.044	0.0092	0.1633	0.034	7.66438	1.79692e-14	906567	0.1127	0.0146	1.1459	1.27	1.0435	0.0092	0.161	0.034	7.71918	1.17082e-14
EA	POAG	0.0962	0.0142	1.0405	1.0744	1.0019	0.0077	0.0254	0.1033	6.77465	1.2471e-11	850775	0.0682	0.0089	1.1113	1.1522	1.0481	0.0085	0.3164	0.0562	7.66292	1.81751e-14
EA	RhA	0.1923	0.0247	1.1459	1.2291	1.0649	0.0095	0.2833	0.0414	7.78543	6.94792e-15	961895	0.1471	0.021	1.1238	1.2047	1.0519	0.0094	0.2535	0.0461	7.00476	2.47406e-12
EA	SBP	0.0729	0.0068	1.194	1.2774	1.0749	0.0101	0.2699	0.0365	10.7206	8.14834e-27	931226	0.0729	0.0068	1.194	1.2767	1.0741	0.0102	0.2677	0.0367	10.7206	8.14834e-27
EA	Stroke_ischemic	0.0343	0.0066	1.0527	1.0685	1.0073	0.0075	0.1062	0.1092	5.19697	2.02563e-07	846097	0.0226	0.0041	1.0864	1.1074	1.0322	0.0093	0.2997	0.0863	5.5122	3.54386e-08
EA	T2D	0.1705	0.0108	1.3581	1.6928	1.0368	0.0125	0.0531	0.0181	15.787	3.82112e-56	869994	0.049	0.0035	1.4069	1.7752	1.071	0.0154	0.0916	0.0199	14	1.55871e-44
EA	TG	0.0993	0.0173	1.2831	1.643	1.0783	0.0144	0.1217	0.0224	5.73988	9.47412e-09	864304	0.0655	0.0118	1.2697	1.6942	1.0667	0.0151	0.0961	0.0217	5.55085	2.84288e-08
EU	2hrG	0.5507	0.1157	1.1333	1.2186	1.0782	0.0232	0.3577	0.1063	4.75972	1.93858e-06	949220	0.1446	0.0279	1.0165	1.0246	0.9841	0.0071	-1		5.1828	2.18584e-07
EU	AD	0.0352	0.0036	1.2103	1.28	1.0857	0.0111	0.3059	0.0398	9.77778	1.40256e-22	922828	0.0141	0.0014	1.1747	1.2703	1.0457	0.0127	0.169	0.047	10.0714	7.38968e-24
EU	ADHD	0.2097	0.0196	1.1651	1.1766	1.0334	0.0084	0.1894	0.0474	10.699	1.02905e-26	938803	0.2073	0.0148	1.1715	1.2014	0.9941	0.0086	-1		14.0068	1.41731e-44
EU	Adiponectin	-0.4059	0.3809	0.9986	1.0107	1.0766	0.0611	7.1478	5.7032	-1.06563	0.286589	959150	0.0156	0.0391	1.0016	0.9991	0.9952	0.0068			0.398977	0.68991
EU	AF	0.1112	0.0172	1.2136	1.4265	1.0306	0.0109	0.0717	0.0255	6.46512	1.01221e-10	1082778	0.1068	0.0161	1.1973	1.4251	1.0029	0.0109	0.0069	0.0255	6.63354	3.27729e-11
EU	AFR	0.129	0.0078	1.2365	1.2998	1.0137	0.009	0.0456	0.0299	16.5385	1.93912e-61	1068950	0.0647	0.0039	1.2398	1.3009	1.0141	0.009	0.0468	0.0298	16.5897	8.26726e-62
EU	AHI	0.0635	0.0387	1.0075	1.0079	0.9951	0.0061	-1		1.64083	0.100833	956541	0.0252	0.009	1.0135	1.0222	0.9978	0.0066	-1		2.8	0.00511026
EU	AHIinNREM	-0.047	0.1552	1.0075	1.0026	1.0051	0.0069	1.9258	2.6016	-0.302835	0.762016	924348	0.0271	0.0248	1.0075	1.0108	1.0012	0.0075	0.1145	0.6888	1.09274	0.274507
EU	AHIinREM	0.4443	0.1679	1.0105	1.009	0.9871	0.0074	-1		2.64622	0.00813973	924337	0.0555	0.0258	1.0016	1.0137	0.9936	0.0085	-1		2.15116	0.0314634
EU	Alb	0.1364	0.0085	1.6108	2.1797	1.1907	0.0169	0.1617	0.0144	16.0471	5.99379e-58	1084332	0.1333	0.0083	1.5995	2.1714	1.1836	0.0171	0.1567	0.0146	16.0602	4.84665e-58
EU	ALBUMIN	-0.1462	0.1145	0.9986	0.9975	1.0078	0.0068			-1.27686	0.201653	956481	-0.0382	0.0723	0.9898	0.983	0.9875	0.0078			-0.528354	0.597254
EU	allDKD	0.3079	0.0983	0.9986	0.9998	0.9695	0.0064			3.13225	0.00173473	997292	0.0912	0.0309	1.0225	1.0221	0.9943	0.0069	-1		2.95146	0.00316279
EU	AllergicRhinitis	0.0349	0.0113	1.0345	1.0411	1.011	0.007	0.2683	0.1698	3.0885	0.00201173	1066268	0.0349	0.0113	1.0345	1.0411	1.011	0.007	0.2682	0.17	3.0885	0.00201173
EU	Allergy	0.0428	0.0038	1.2299	1.3599	1.0572	0.0104	0.159	0.0289	11.2632	1.9948e-29	1060762	0.0365	0.0031	1.2464	1.3718	1.0694	0.0103	0.1867	0.0276	11.7742	5.30217e-32
EU	ALLOA	0.0786	0.0041	1.3581	1.4516	1.0564	0.0103	0.1248	0.0227	19.1707	6.49883e-82	969943	0.0459	0.0024	1.334	1.4174	1.0273	0.0103	0.0655	0.0246	19.125	1.56373e-81
EU	ALP	0.2846	0.0371	1.7885	3.5971	1.2756	0.0228	0.1061	0.0088	7.67116	1.70449e-14	149041	0.2018	0.0348	1.9881	5.1232	1.2688	0.0326	0.0652	0.0079	5.79885	6.6771e-09
EU	ALS	0.059	0.0075	1.1082	1.1367	1.041	0.0079	0.2998	0.058	7.86667	3.64215e-15	957365	0.0251	0.0034	1.071	1.1057	1.0159	0.0087	0.1504	0.0821	7.38235	1.55516e-13
EU	ALT	0.125	0.0089	1.5622	2.1754	1.1407	0.0162	0.1197	0.0137	14.0449	8.2734e-45	203676	0.0741	0.0081	1.6108	2.4137	1.1273	0.0208	0.0901	0.0147	9.14815	5.79178e-20
EU	AMD	0.2549	0.0959	1.1207	1.2172	1.0664	0.0118	0.3055	0.0542	2.65798	0.00786112	952938	0.1982	0.0813	1.0926	1.2259	1.0461	0.0127	0.2041	0.0561	2.43788	0.0147735
EU	AnyCVD	0.019	0.0074	1.0375	1.0367	1.0148	0.0067	0.4031	0.1828	2.56757	0.0102415	1066273	0.019	0.0074	1.0375	1.0367	1.0148	0.0067	0.4027	0.1834	2.56757	0.0102415
EU	Ap-LM	0.3715	0.0154	2.7085	4.7305	1.5357	0.03	0.1436	0.008	24.1234	1.42128e-128	962013	0.1848	0.0078	2.8619	5.0642	1.6633	0.0389	0.1632	0.0096	23.6923	4.32804e-124
EU	ApoB	0.2334	0.0388	1.6145	2.9117	1.2206	0.0201	0.1154	0.0105	6.01546	1.79372e-09	1084328	0.2331	0.0387	1.6145	2.9106	1.2195	0.02	0.1149	0.0105	6.02326	1.70943e-09
EU	AscAortaDiam	0.3995	0.0323	1.2005	1.3677	1.0474	0.0105	0.129	0.0286	12.3684	3.87361e-35	976295	0.2392	0.0202	1.2531	1.4324	1.0749	0.0131	0.1733	0.0304	11.8416	2.37916e-32
EU	AST	0.1406	0.012	1.5511	2.3978	1.1679	0.0175	0.1201	0.0125	11.7167	1.04712e-31	148899	0.1254	0.0129	1.714	2.9542	1.1657	0.0256	0.0848	0.0131	9.72093	2.45528e-22
EU	Asthma_AdultOnset	0.0814	0.0082	1.1459	1.1754	1.0452	0.0088	0.2574	0.0504	9.92683	3.18214e-23	617492	0.0567	0.0052	1.1973	1.2684	1.0672	0.0109	0.2503	0.0407	10.9038	1.10486e-27
EU	Asthma_ChildhoodOnset	0.2722	0.0416	1.1459	1.2748	1.08	0.012	0.2913	0.0437	6.54327	6.01883e-11	617489	0.1728	0.0221	1.2299	1.4118	1.1104	0.0151	0.268	0.0366	7.819	5.32427e-15
EU	Asthma	0.0774	0.0049	1.4962	1.7847	1.1315	0.0131	0.1676	0.0167	15.7959	3.31924e-56	967770	0.0337	0.0025	1.5217	1.9568	1.1286	0.0177	0.1344	0.0185	13.48	2.05107e-41
EU	BackPain	0.0503	0.0025	1.3581	1.4186	1.0588	0.0092	0.1406	0.0221	20.12	4.93078e-90	817751	0.0273	0.0016	1.3789	1.4362	1.0756	0.0121	0.1734	0.0277	17.0625	2.82215e-65
EU	BarretsEsophagus	0.3899	0.021	1.1876	1.2557	0.9342	0.0093	-1		18.5667	5.98022e-77	928783	0.2289	0.0153	1.1747	1.2288	0.9632	0.0093	-1		14.9608	1.32456e-50
EU	BasoCount	0.0669	0.0057	1.3169	1.7395	1.1142	0.0144	0.1545	0.0194	11.7368	8.25101e-32	972088	0.0245	0.0023	1.3719	1.8158	1.1605	0.0171	0.1967	0.0209	10.6522	1.7034e-26
EU	BasoPerc	0.0481	0.005	1.2201	1.4813	1.0761	0.0121	0.1581	0.0251	9.62	6.58312e-22	971706	0.0287	0.0029	1.2498	1.5642	1.0876	0.015	0.1552	0.0266	9.89655	4.30876e-23
EU	BFP	0.1916	0.0078	1.4962	1.6525	1.0915	0.0106	0.1402	0.0163	24.5641	3.05727e-133	978444	0.0873	0.0038	1.4926	1.652	1.0908	0.0124	0.1393	0.019	22.9737	8.545e-117
EU	BILIRUBIN	0.2028	0.0937	1.4998	2.6729	1.1521	0.0167	0.0909	0.01	2.16435	0.0304372	148924	0.1761	0.0853	1.6108	3.3864	1.125	0.0241	0.0524	0.0101	2.06448	0.0389724
EU	BIP	0.7117	0.0399	1.3101	1.369	1.0526	0.0083	0.1426	0.0225	17.8371	3.64156e-71	972254	0.3999	0.021	1.3034	1.3797	1.0123	0.0111	0.0324	0.0292	19.0429	7.53054e-81
[truncated: 197 more rows]

## Sheet: Table S5b
Trait 1	Trait 2	Genetic correlation results using the overlap-corrected GWAS summary statistics			Genetic correlation results using the largest GWAS summary statistics
[truncated: 8,098 more rows]

[truncated: 15 more sheets: Table S5c, Table S6a, Table S6b, Table S6c, Table S7, Table S8a, Table S8b, Table S8c, Table S9a, Table S9b, Table S10a, Table S10b, Table S10c, Table S11, Table S12]
